# Supplementary material for: Heat Shock Protein SSA1 Enriched in Hypoxic Secretome of Candida albicans Exerts an Immunomodulatory Effect via Regulating Macrophage Function
Source: MDPI journal article supplement (doi:10.3390/cells13020127), 2024-01-10
Supplement: s1 [file s1]

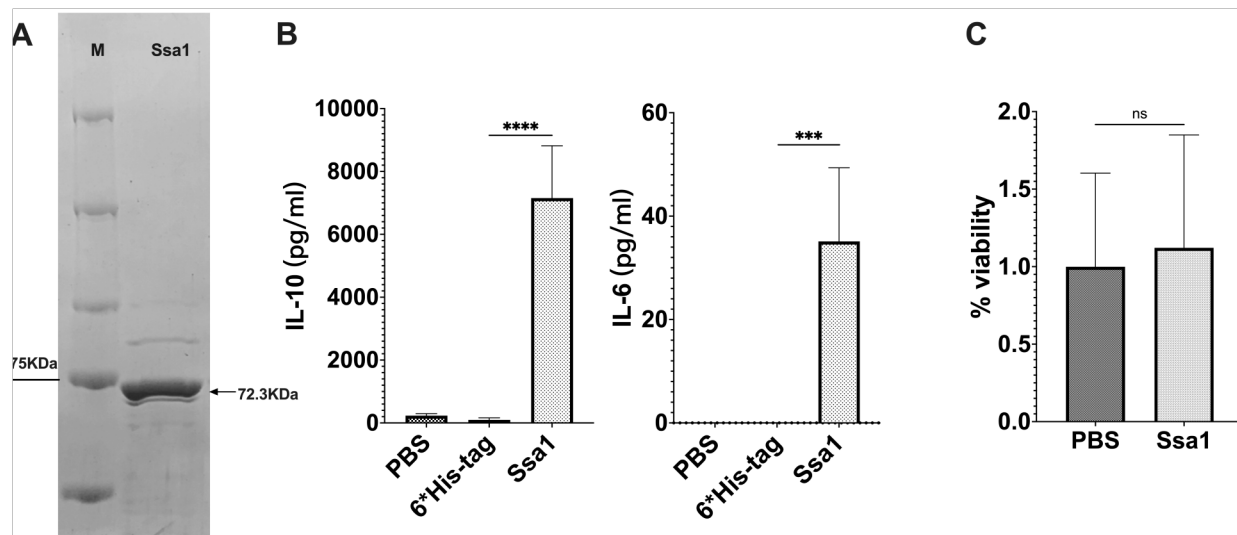

**Figure S2. Recombinant *C. albicans* Ssa1 (A), and its effect on cytokine production (B) and viability (C) of RAW 264.7 cells.** (A) Purified recombinant Ssa1 on 8% SDS-polyacrylamide gel with CBB-staining. (His)6-tagged Ssa1 from *E. coli* lysate was purified, and lipopolysaccharide was removed as described in the Materials and Methods. From 1.2 L of *E. coli* culture, 7.36 mg of recombinant Ssa1 protein was obtained. The estimated sized of (His)6-tagged Ssa1 was 72.3 kDa. (B) Cytokine production of RAW 264.7 cells after stimulated by recombinant Ssa1. RAW 264.7 cells ( $1 \times 10^6$  cells) were seeded in 24-well plates and incubated with or without 5  $\mu$ g recombinant Ssa1 for 48 h, and the production IL-10 and IL-6 was determined by ELISA. To examine neither 6 histamine residues nor residual lipopolysaccharide affect this cytokine response, a 2.3 kDa (His)6-containing protein from the pET-15b plasmid was prepared by the same procedure and 0.5  $\mu$ g of this protein used as a control. As the molecular weight of the (His)6-protein control (2.3 kDa) is 31-fold smaller than that of (His)6-tagged Ssa1 (72.3 kDa), 0.5  $\mu$ g (His)6-protein control (217.39 pmol) was three times higher in molar mass than 5  $\mu$ g (His)6-tagged Ssa1 (69.16 pmol). There was a significant difference in the production of IL-10 and IL-6 between (His)6-protein control and (His)6-tagged Ssa1 (\*\*\*\*:  $P < 0.0001$ , \*\*\*:  $P < 0.0002$ , statistical analysis by unpaired Student's *t*-test,  $n = 6$ ). Moreover, no significant differences in cytokine production between PBS group and (His)6-protein control group were found, indicating that the cytokine response was due to Ssa1, but not 6 histidine residues or lipopolysaccharide. (C) Recombinant Ssa1 does not affect cell viability of mouse macrophages. RAW 264.7 cells ( $1 \times 10^4$  cells/well) were seeded in a 96-well plate with or without 0.5  $\mu$ g Ssa1. After 24 h of incubation, the culture supernatant in each well was replaced with 100  $\mu$ L of fresh medium containing 10  $\mu$ L of cell proliferation reagent (WST1; Roche). After color development, the absorbance at 420 nm was measured using the absorbance at 600 nm as a reference wavelength. Cell-free medium was used as blank, and the absorbance of RAW 264.7 cells without Ssa1 was calculated as 100% viability (ns: not significant, statistical analysis by unpaired Students' *t*-test,  $n = 9$  from 3 independent experiments).
