# Supplementary material for: Heat Shock Protein SSA1 Enriched in Hypoxic Secretome of Candida albicans Exerts an Immunomodulatory Effect via Regulating Macrophage Function
Source: MDPI journal article supplement (doi:10.3390/cells13020127), 2024-01-10
Supplement: s1 [file s1]

**Table S2 Oligomers and primers for Ssa1- construction**

| Oligomer/primer                     | Sequence                                    |
|-------------------------------------|---------------------------------------------|
| guide-RNA oligos F                  | 5'-ATTTGAAAATGAGCAACACAAGAATG-3'            |
| guide-RNA oligos R                  | 5'-AAAACATTCTTGTGTTGCTCATTTTC-3'            |
| Repair template primer upstream F   | 5'-CTCTTTCTAGTTTATTCCAATG-3'                |
| Repair template primer upstream R   | 5'-AATGAGCAACACAAGAAT <b>TC</b> AGGTTGT-3'  |
| Repair template primer downstream F | 5'-ATTGATTTAGGTACAACCT <b>GAATT</b> CTTG-3' |
| Repair template primer downstream R | 5'-AAATGGGAAATGTTTAGCATCA-3'                |
| Checking primer F                   | 5'-GTACCACCACCCAAATCG-3'                    |
| Checking primer R                   | 5'-CCTTAAATCACCTTTTCAACAATTTTCC-3'          |
| Sequencing F                        | 5'-TATTCTATTCTATTTCTTCTTTAC-3'              |
| Sequencing R                        | 5'-GGATCATCAAATTTTCTCCCAA-3'                |

Underlines: EcoRI recognition site in repair template

Bold font: Stop codon
