# Supplementary material for: Heat Shock Protein SSA1 Enriched in Hypoxic Secretome of Candida albicans Exerts an Immunomodulatory Effect via Regulating Macrophage Function
Source: MDPI journal article supplement (doi:10.3390/cells13020127), 2024-01-10
Supplement: s1 [file s1]

**Table S4. List of proteins that were significantly less abundant in hypoxic secretome ( $P < 0.05$ )**

| Gene ID                            | Protein Name                                                     | P-value | Fold Change<br>(Hypoxic vs<br>Normoxic) |
|------------------------------------|------------------------------------------------------------------|---------|-----------------------------------------|
| <i>HHF1</i>                        | Histone H4                                                       | 0.01428 | 0                                       |
| <i>CAT1</i>                        | Peroxisomal catalase                                             | 0.04663 | 0.0102965                               |
| <i>PET9</i>                        | ADP/ATP translocase                                              | 0.04014 | 0.019962                                |
| <i>RPS19A</i>                      | Ribosomal 40S subunit protein S19A                               | 0.00192 | 0.0235732                               |
| <i>RPL38</i>                       | Ribosomal 60S subunit protein L38                                | 0.00341 | 0.0256623                               |
| <i>TMA19</i>                       | Translationally-controlled tumor protein<br>homolog              | 0.00691 | 0.0271787                               |
| <i>RPS20</i>                       | Ribosomal 40S subunit protein S20                                | 0.00002 | 0.0454775                               |
| <i>RAD23</i>                       | UV excision repair protein RAD23                                 | 0.01059 | 0.0473624                               |
| <i>CAALFM_C5024</i><br><i>00WA</i> | Acyl-protein thioesterase 1                                      | 0.02943 | 0.0488435                               |
| <i>COX5</i>                        | Cytochrome c oxidase subunit Va                                  | 0.01808 | 0.0524154                               |
| <i>DUT1</i>                        | Deoxyuridine 5'-triphosphate<br>nucleotidohydrolase              | 0.00324 | 0.0536025                               |
| <i>MDH1-1</i>                      | Malate dehydrogenase                                             | 0.00004 | 0.0549651                               |
| <i>COX2</i>                        | Cytochrome c oxidase subunit 2                                   | 0.01501 | 0.0555613                               |
| <i>DPH5</i>                        | Diphthine methyl ester synthase 1                                | 0.01436 | 0.0682456                               |
| <i>CAALFM_CR030</i><br><i>20CA</i> | 5'-Deoxynucleotidase                                             | 0.01800 | 0.0921407                               |
| <i>FUM12</i>                       | Fumarate hydratase                                               | 0.00219 | 0.0961438                               |
| <i>orf19.5783</i>                  | Protein-arginine N-methyltransferase                             | 0.00406 | 0.0976128                               |
| <i>SSC1</i>                        | Heat shock protein SSC1, mitochondrial                           | 0.00813 | 0.0995035                               |
| <i>THS1</i>                        | Threonyl-tRNA synthetase                                         | 0.00353 | 0.1027321                               |
| <i>POR1</i>                        | Mitochondrial outer membrane protein                             | 0.00181 | 0.1062212                               |
| <i>LOS1</i>                        | Exportin-T                                                       | 0.03128 | 0.1085245                               |
| <i>SSA2</i>                        | Heat shock protein SSA2                                          | 0.00014 | 0.1131992                               |
| <i>ATP2</i>                        | ATP synthase subunit beta                                        | 0.00018 | 0.1218883                               |
| <i>RPS12</i>                       | 40S ribosomal protein S12                                        | 0.04509 | 0.1309219                               |
| <i>NPT1</i>                        | Nicotinate phosphoribosyltransferase                             | 0.04194 | 0.1332343                               |
| <i>orf19.2489</i>                  | Uncharacterized protein                                          | 0.01524 | 0.1341046                               |
| <i>ALD5</i>                        | Aldehyde dehydrogenase (NAD(P)(+))                               | 0.04257 | 0.138377                                |
| <i>THR1</i>                        | Homoserine kinase                                                | 0.01069 | 0.1418983                               |
| <i>LAT1</i>                        | Acetyltransferase component of pyruvate<br>dehydrogenase complex | 0.03934 | 0.145565                                |
| <i>MIC60</i>                       | MICOS complex subunit MIC60                                      | 0.00737 | 0.148982                                |
| <i>orf19.6717</i>                  | Putative serine hydrolase                                        | 0.00227 | 0.1496993                               |
| <i>PDB1</i>                        | Pyruvate dehydrogenase E1 component<br>subunit beta              | 0.00650 | 0.1541602                               |
| <i>RNA1</i>                        | GTPase-activating protein                                        | 0.00387 | 0.1609203                               |
| <i>HGT6</i>                        | Hexose transporter                                               | 0.00918 | 0.1631077                               |
| <i>ARD</i>                         | Ardp                                                             | 0.00699 | 0.1679522                               |
| <i>CAALFM_CR101</i><br><i>40WA</i> | Uncharacterized protein                                          | 0.00238 | 0.1851241                               |
| <i>orf19.5627</i>                  | Uncharacterized protein                                          | 0.03996 | 0.1932374                               |

**Table S4. List of proteins that were significantly less abundant in hypoxic secretome ( $P < 0.05$ )**

|                     |                                               |         |           |
|---------------------|-----------------------------------------------|---------|-----------|
| <i>CHS3</i>         | Chitin synthase                               | 0.00467 | 0.1976797 |
| <i>ERG10</i>        | Acetyl-CoA C-acetyltransferase                | 0.03883 | 0.1977768 |
| <i>PNP1</i>         | Purine nucleoside phosphorylase               | 0.01285 | 0.2027644 |
| <i>ERO1</i>         | ER oxidoreductin                              | 0.01050 | 0.2045617 |
| <i>CAALFM_CR035</i> | Uncharacterized protein                       | 0.04243 | 0.2060871 |
| <i>20CA</i>         |                                               |         |           |
| <i>orf19.4149.1</i> | Ribosomal 40S subunit protein S11A            | 0.00556 | 0.2067683 |
| <i>AIP2</i>         | D-lactate dehydrogenase                       | 0.00707 | 0.2126529 |
| <i>GLK1</i>         | Phosphotransferase                            | 0.01040 | 0.2144066 |
| <i>MRPL4</i>        | 54S ribosomal protein L4, mitochondrial       | 0.00126 | 0.220519  |
| <i>TIF5</i>         | Translation initiation factor eIF5            | 0.01271 | 0.2218943 |
| <i>CIT1</i>         | Citrate synthase                              | 0.01295 | 0.2321603 |
| <i>RPL27A</i>       | 60S ribosomal protein L27                     | 0.00221 | 0.2451604 |
| <i>TUP1</i>         | Transcriptional repressor TUP1                | 0.00382 | 0.2475561 |
| <i>PGM2</i>         | Phosphoglucomutase                            | 0.02810 | 0.2612159 |
| <i>PHM7</i>         | Phm7p                                         | 0.00061 | 0.2625286 |
| <i>RPS6A</i>        | 40S ribosomal protein S6                      | 0.00666 | 0.2648646 |
| <i>orf19.6701</i>   | Prolyl-tRNA synthetase                        | 0.03186 | 0.2673893 |
| <i>GLN4</i>         | Glutamyl-tRNA synthetase                      | 0.01776 | 0.2852747 |
| <i>RPL32</i>        | Ribosomal 60S subunit protein L32             | 0.01907 | 0.2936814 |
| <i>GUA1</i>         | GMP synthase [glutamine-hydrolyzing]          | 0.00866 | 0.3205714 |
| <i>orf19.6559</i>   | Transcription factor TFIIC subunit            | 0.03934 | 0.3323373 |
| <i>CYS3</i>         | Cystathionine gamma-lyase                     | 0.02218 | 0.3369011 |
| <i>CAALFM_CR037</i> | Flavin mononucleotide kinase 1                | 0.00929 | 0.3388528 |
| <i>40CA</i>         |                                               |         |           |
| <i>URA2</i>         | Aspartate carbamoyltransferase                | 0.00022 | 0.3638344 |
| <i>PIL1</i>         | Lipid-binding protein                         | 0.02135 | 0.3686599 |
| <i>PDII</i>         | Protein disulfide-isomerase                   | 0.01568 | 0.374841  |
| <i>BNA5</i>         | Kynureninase                                  | 0.03719 | 0.383384  |
| <i>ARC1</i>         | Arc1p                                         | 0.03805 | 0.3857364 |
| <i>RIB3</i>         | 3,4-Dihydroxy-2-butanone 4-phosphate synthase | 0.04770 | 0.390528  |
| <i>orf19.3053</i>   | Uncharacterized protein                       | 0.01348 | 0.4065866 |
| <i>ATP4</i>         | ATP synthase subunit 4                        | 0.00952 | 0.4099336 |
| <i>LKH1</i>         | Leucine aminopeptidase 2                      | 0.01740 | 0.4869792 |
| <i>RPS24</i>        | 40S ribosomal protein S24                     | 0.00904 | 0.501866  |
| <i>SAP2</i>         | Candidapepsin-2                               | 0.04047 | 0.5108188 |
| <i>RPS22A</i>       | 40S ribosomal protein S22-A                   | 0.00245 | 0.5465655 |
| <i>ARF3</i>         | Arf3p                                         | 0.03362 | 0.5566354 |
| <i>KRE30</i>        | ATP-binding cassette family ATPase            | 0.02218 | 0.5724679 |
