# Supplementary material for: Heat Shock Protein SSA1 Enriched in Hypoxic Secretome of Candida albicans Exerts an Immunomodulatory Effect via Regulating Macrophage Function
Source: MDPI journal article supplement (doi:10.3390/cells13020127), 2024-01-10
Supplement: s1 [file s1]

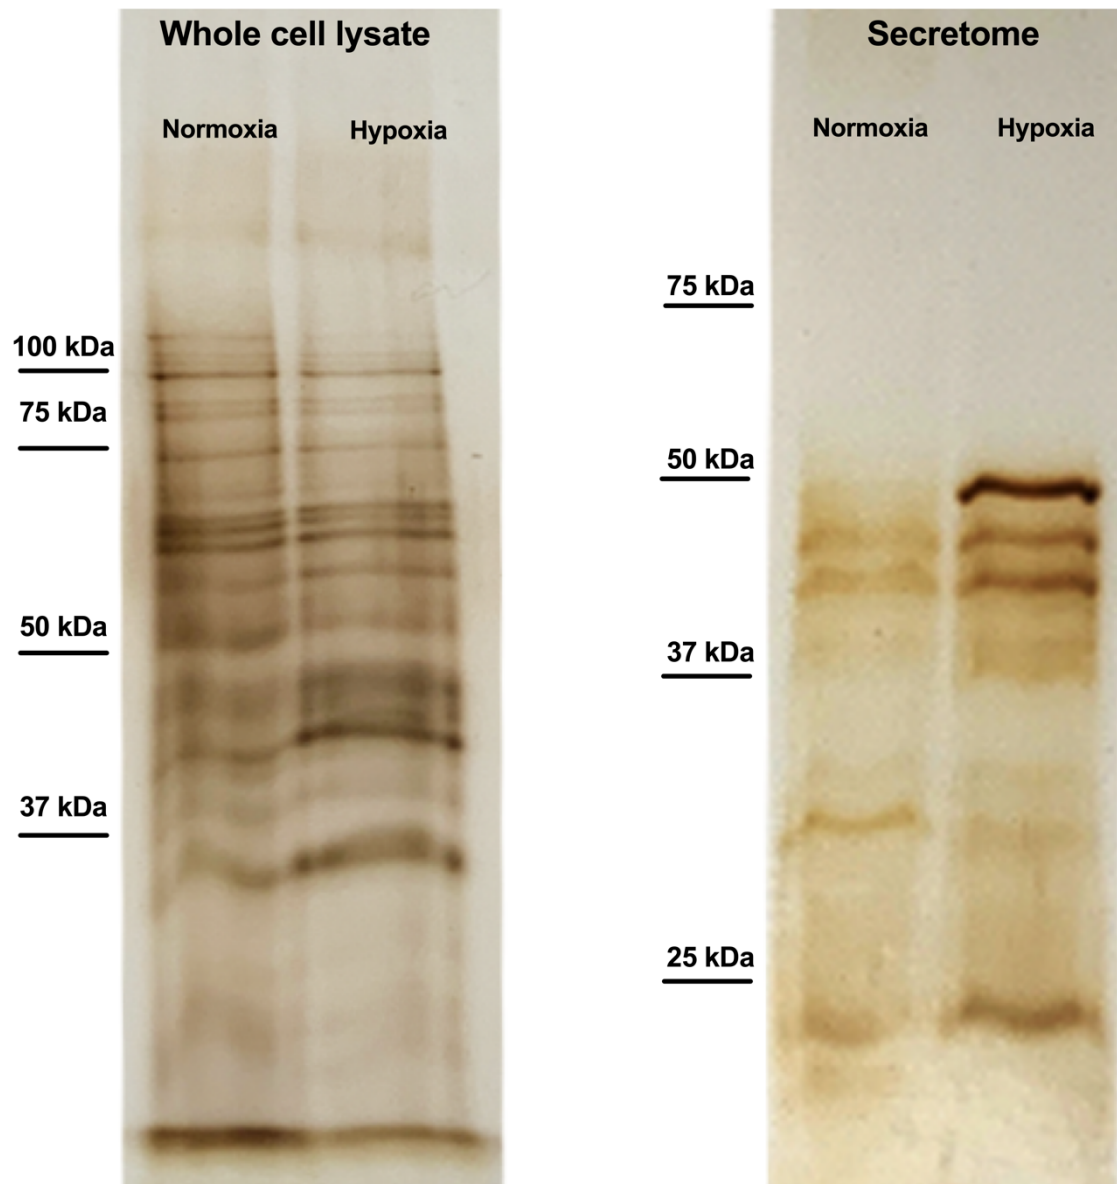

**Figure S1: Difference in protein pattern between NS and HS.** Five  $\mu\text{g}$  protein of NS and HS was applied to 10% SDS-polyacrylamide gel. Yeast cell lysates from normoxic and hypoxic culture condition were also applied to 10% gel. After electrophoresis, the gels were stained using Silver Stain II Kit (Wako) according to the manufacturer's protocol.
