# Supplementary material for: Heat Shock Protein SSA1 Enriched in Hypoxic Secretome of Candida albicans Exerts an Immunomodulatory Effect via Regulating Macrophage Function
Source: MDPI journal article supplement (doi:10.3390/cells13020127), 2024-01-10
Supplement: s1 [file s1]

Table S6. GO enrichment of the significantly up-regulated and down-regulated proteins in Ssa1-treated mouse BMMs

| Function                                      | Group Genes                                                                                                                                                                                                                                                                                                                                                                                                                                                                                                                                                       |
|-----------------------------------------------|-------------------------------------------------------------------------------------------------------------------------------------------------------------------------------------------------------------------------------------------------------------------------------------------------------------------------------------------------------------------------------------------------------------------------------------------------------------------------------------------------------------------------------------------------------------------|
| signaling receptor binding                    | <i>Apoe, Cd86, H2-Q8, H2-T23, Hsp90ab1, Hsp90b1, Icam1, Il1rn, Isg15, Lpl, Lrp1, Nampt, Pdia3, Sem4d, Src, Tap1, Tap2, Tlr2</i>                                                                                                                                                                                                                                                                                                                                                                                                                                   |
| protein-containing complex binding            | <i>Apoe, Capn2, Clic4, Colec12, Ddb1, Gbp2, H2-Q8, H2-T23, Hspa5, Icam1, Isg15, Lpl, Lrp1, Src, Tap1, Tap2, Tapbp, Tlr2, Trex1</i>                                                                                                                                                                                                                                                                                                                                                                                                                                |
| establishment of protein localization         | <i>Apoe, Cd200, Chmp4b, Cpt1a, Gbp4, Hnrnp, Hsp90ab1, Hsp90b1, Hspa5, Il1rn, Lrp1, Ptgs2, Rsad2, Slc15a3, Src, Tap1, Tap2, Tlr2, Trex1</i>                                                                                                                                                                                                                                                                                                                                                                                                                        |
| binding                                       | <i>Apoe, Aqr, Bst2, Capn2, Cd200, Cd274, Cd300ld3, Cd40, Cd86, Chmp4b, Clec4e, Clic4, Cmpk2, Colec12, Cpt1a, Csf1r, Daxx, Ddb1, Dlat, Gbp2, Gbp2b, Gbp4, Gbp5, Glg1, Gpaal, Gyg, H2-Q8, H2-T23, Herc6, Hnrnp, Hsp90ab1, Hsp90b1, Hspa5, Icam1, Ifi205, Ifit1, Ifit2, Ifit3, Iigp1, Il18bp, Il1rn, Irgm1, Isg15, Isg20, Lpl, Lrp1, Mov10, Mthfd2, Nampt, Nfkb2, Nt5c3, Oasl1, Oat, Pdia3, Phf11, Plxna1, Ptgs2, Rnaset2a, Rnaset2b, Rnf114, Rpl221l, Rsad2, Sdc1, Sem4d, Serpina3k, Sp110, Src, Tap1, Tap2, Tapbp, Tgm2, Tlr2, Trex1</i>                           |
| protein binding                               | <i>Apoe, Bst2, Capn2, Cd200, Cd274, Cd300ld3, Cd40, Cd86, Chmp4b, Clec4e, Clic4, Cpt1a, Csf1r, Daxx, Ddb1, Dlat, Gbp2, Gbp2b, Gbp4, Gbp5, Glg1, Gyg, H2-Q8, H2-T23, Herc6, Hnrnp, Hsp90ab1, Hsp90b1, Hspa5, Icam1, Ifi205, Ifit1, Ifit2, Ifit3, Iigp1, Il18bp, Il1rn, Irgm1, Isg15, Lpl, Lrp1, Mov10, Nampt, Nfkb2, Oat, Pdia3, Plxna1, Ptgs2, Rsad2, Sdc1, Sem4d, Serpina3k, Src, Tap1, Tap2, Tapbp, Tlr2, Trex1</i>                                                                                                                                             |
| viral process                                 | <i>Apoe, Bst2, Chmp4b, Csf1r, Ddb1, Hsp90ab1, Icam1, Isg15, Isg20, Oasl1, Rsad2</i>                                                                                                                                                                                                                                                                                                                                                                                                                                                                               |
| hydrolase activity, acting on ester bonds     | <i>Cd86, Hsp90ab1, Hsp90b1, Isg20, Lpl, Lrp1, Nt5c3, Oasl1, Rnaset2a, Rnaset2b, Sem4d, Src, Trex1</i>                                                                                                                                                                                                                                                                                                                                                                                                                                                             |
| identical protein binding                     | <i>Apoe, Bst2, Chmp4b, Cpt1a, Csf1r, Daxx, Dlat, Gbp2, Gbp2b, Gbp4, Gbp5, Gyg, H2-Q8, H2-T23, Hsp90ab1, Ifit3, Iigp1, Lpl, Nampt, Oat, Pdia3, Ptgs2, Sdc1, Sem4d, Tap1, Tap2, Tlr2, Trex1</i>                                                                                                                                                                                                                                                                                                                                                                     |
| hydrolase activity, acting on acid anhydrides | <i>Apoe, Aqr, Cd40, Clec4e, Cmpk2, Csf1r, Gbp2, Gbp2b, Gbp4, Gbp5, Gpaal, Hsp90ab1, Hsp90b1, Hspa5, Icam1, Iigp1, Irgm1, Lpl, Mov10, Plxna1, Sem4d, Src, Tap1, Tap2, Tgm2, Tlr2, Trex1</i>                                                                                                                                                                                                                                                                                                                                                                        |
| hydrolase activity                            | <i>Acod1, Aldh1b1, Apoe, Aqr, Bst2, Capn2, Cd200, Cd40, Cd86, Cmpk2, Cpt1a, Csf1r, Daxx, Dlat, Gbp2, Gbp2b, Gbp4, Gbp5, Gpaal, Gyg, Herc6, Hsp90ab1, Hsp90b1, Hspa5, Icam1, Iigp1, Il1rn, Irgm1, Isg20, Lpl, Lrp1, Mov10, Mthfd2, Nampt, Nt5c3, Oasl1, Oat, Pdia3, Plxna1, Ptgs2, Rnaset2a, Rnaset2b, Rnf114, Rsad2, Sec11a, Sem4d, Serpina3k, Src, Tap1, Tgm2, Tlr2, Trex1</i>                                                                                                                                                                                   |
| regulation of response to external stimulus   | <i>Acod1, Apoe, Cd200, Cd274, Cd40, Clec4e, Csf1r, Gbp4, Gbp5, Hspa5, Ifi205, Irgm1, Isg15, Lpl, Lrp1, Oasl1, Ptgs2, Rsad2, Sem4d, Slc7a2, Src, Tap1, Tap2, Tlr2, Trex1</i>                                                                                                                                                                                                                                                                                                                                                                                       |
| cellular catabolic process                    | <i>Aldh1b1, Apoe, Capn2, Chmp4b, Cpt1a, Ddb1, Herc6, Hnrnp, Hsp90ab1, Hsp90b1, Hspa5, Iigp1, Irgm1, Isg15, Isg20, Lpl, Lrp1, Mov10, Nampt, Nt5c3, Oat, Rnaset2a, Rnaset2b, Rnf114, Tlr2, Trex1, Ubxn6</i>                                                                                                                                                                                                                                                                                                                                                         |
| adaptive immune response                      | <i>Acod1, Apoe, Bst2, Cd200, Cd274, Cd40, Cd86, Clec4e, Csf1r, Gbp5, H2-T23, Icam1, Ifi205, Il18bp, Irgm1, Lrp1, Nampt, Nfkb2, Rsad2, Slc7a2, Tap1, Tap2, Tlr2, Trex1</i>                                                                                                                                                                                                                                                                                                                                                                                         |
| regulation of cytokine production             | <i>Acod1, Apoe, Bst2, Capn2, Cd200, Cd274, Cd300ld3, Cd40, Cd86, Clec4e, Colec12, Csf1r, Daxx, Gbp4, Gbp5, Glg1, H2-T23, Hsp90ab1, Hspa5, Icam1, Ifi205, Il1rn, Irgm1, Isg15, Lpl, Lrp1, Oasl1, Pdia3, Ptgs2, Rsad2, Sem4d, Slc15a3, Slc7a2, Src, Tap1, Tap2, Tapbp, Tgm2, Tlr2, Trex1</i>                                                                                                                                                                                                                                                                        |
| immune response                               | <i>Acod1, Apoe, Bst2, Cd200, Cd274, Cd300ld3, Cd40, Cd86, Clec4e, Colec12, Csf1r, Daxx, Gbp2, Gbp2b, Gbp4, Gbp5, Glg1, H2-L, H2-Q8, H2-T23, Herc6, Hsp90ab1, Hspa5, Icam1, Ifi205, Ifit1, Ifit2, Ifit3, Iigp1, Il18bp, Il1rn, Irgm1, Isg15, Isg20, Lpl, Lrp1, Nampt, Nfkb2, Oasl1, Pdia3, Ptgs2, Rnaset2a, Rnaset2b, Rsad2, Sem4d, Slc15a3, Slc7a2, Sp110, Src, Tap1, Tap2, Tapbp, Tgm2, Tlr2, Trex1</i>                                                                                                                                                          |
| defense response                              | <i>AA467197, Acod1, Apoe, Bst2, Capn2, Cd200, Cd274, Cd300ld3, Cd40, Cd86, Chmp4b, Clec4e, Clic4, Cmpk2, Colec12, Cpt1a, Csf1r, Daxx, Ddb1, Gbp2, Gbp2b, Gbp4, Gbp5, Glg1, H2-L, H2-Q8, H2-T23, Herc6, Hnrnp, Hsp90ab1, Hsp90b1, Hspa5, Icam1, Ifi205, Ifit1, Ifit2, Ifit3, Iigp1, Il18bp, Il1rn, Irgm1, Isg15, Isg20, Lpl, Lrp1, Mov10, Nampt, Nfkb2, Nt5c3, Oasl1, Pdia3, Plxna1, Ptgs2, Rnaset2a, Rnaset2b, Rsad2, Sdc1, Sem4d, Serpina3k, Slc15a3, Slc7a2, Sp110, Src, Tap1, Tap2, Tapbp, Tgm2, Tlr2, Trex1, Ubxn6</i>                                        |
| response to organic substance                 | <i>Acod1, Apoe, Bst2, Capn2, Cd200, Cd274, Cd300ld3, Cd40, Cd86, Chmp4b, Clec4e, Clic4, Cmpk2, Colec12, Cpt1a, Csf1r, Daxx, Ddb1, Gbp2, Gbp2b, Gbp4, Gbp5, Glg1, H2-T23, Hnrnp, Hsp90ab1, Hsp90b1, Hspa5, Icam1, Ifi205, Ifit1, Ifit2, Ifit3, Iigp1, Il1rn, Irgm1, Isg15, Lpl, Lrp1, Mov10, Nampt, Nfkb2, Oasl1, Pdia3, Plxna1, Ptgs2, Rsad2, Sdc1, Sem4d, Serpina3k, Slc15a3, Sp110, Src, Tap2, Tgm2, Tlr2, Trex1, Ubxn6</i>                                                                                                                                     |
| regulation of immune response                 | <i>Acod1, Aldh1b1, Apoe, Aqr, Bst2, Capn2, Cd200, Cd274, Cd300ld3, Cd40, Cd86, Chmp4b, Clec4e, Clic4, Cmpk2, Colec12, Cpt1a, Csf1r, Daxx, Ddb1, Dlat, Gbp2, Gbp2b, Gbp4, Gbp5, Glg1, Gpaal, Gyg, H2-T23, Herc6, Hnrnp, Hsp90ab1, Hsp90b1, Hspa5, Icam1, Ifi205, Ifit1, Ifit2, Ifit3, Iigp1, Il1rn, Irgm1, Isg15, Isg20, Lpl, Lrp1, Mov10, Mthfd2, Nampt, Nfkb2, Nt5c3, Oasl1, Oat, Pdia3, Plxna1, Ptgs2, Rnaset2a, Rnaset2b, Rnf114, Rpl221l, Rsad2, Sdc1, Sec11a, Sem4d, Serpina3k, Slc15a3, Slc7a2, Sp110, Src, Tap1, Tap2, Tapbp, Tgm2, Tlr2, Trex1, Ubxn6</i> |
