# Supplementary material for: Heat Shock Protein SSA1 Enriched in Hypoxic Secretome of Candida albicans Exerts an Immunomodulatory Effect via Regulating Macrophage Function
Source: MDPI journal article supplement (doi:10.3390/cells13020127), 2024-01-10
Supplement: s1 [file s1]

**Table S1 Primers for gene expression quantified by RT-qPCR.**

| Gene               | Primer  | Sequence                        |
|--------------------|---------|---------------------------------|
| CD86               | Forward | 5'-ACGATGGACCCCAGATGCACCA-3'    |
|                    | Reverse | 5'-GCGTCTCCACGGAAACAGCA-3'      |
| CD11c              | Forward | 5'-TGGGGTTTGTTCCTTGTCTTG-3'     |
|                    | Reverse | 5'-GCCTGTGTGATAGCCACATTT-3'     |
| Arg1               | Forward | 5'-GGTCCAGAAGAATGGAAGAGTCAG-3'  |
|                    | Reverse | 5'-TGGCAGATATGCAGGGAGTCACC-3'   |
| CD206              | Forward | 5'-GGTTCGGGATTGTGGAGCAGAT-3'    |
|                    | Reverse | 5'-CACAGACGGCTCCATTTGCATT-3'    |
| GAPDH              | Forward | 5'-TGAAGGTCGGTGTGAACGGATTTGG-3' |
|                    | Reverse | 5'-ACGACATACTCAGCACCGGCCTCAC-3' |
| CCL1               | Forward | 5'-GCTTACGGTCTCCAATAGCTGC-3'    |
|                    | Reverse | 5'-GCTTTCTCTACCTTTGTTCAGCC-3'   |
| LIGHT<br>(TNFSF14) | Forward | 5'-GGCTGGTTTCTCCTGAGACTGC-3'    |
|                    | Reverse | 5'-CCCCATCATGATACGTCAAGCC-3'    |
