# Supplementary material for: Heat Shock Protein SSA1 Enriched in Hypoxic Secretome of Candida albicans Exerts an Immunomodulatory Effect via Regulating Macrophage Function
Source: Cells. 2024 Jan 10;13(2):127. doi: 10.3390/cells13020127 (PMC10814802; doi:10.3390/cells13020127)
Supplement: Supplementary file 1 [file cells-13-00127-s001.zip]

Archive with 11 entries (11 files):
- Figure S1.pdf
- Figure S2.pdf
- Figure S3.pdf
- Figure S4. Fig2B Zoom-in.png
- Figure S5. Fig2C Zoom-in.png
- Table S1.pdf
- Table S2.pdf
- Table S3.xlsx
- Table S4.pdf
- Table S5.xlsx
- Table S6.pdf
