# Supplementary material for: Heat Shock Protein SSA1 Enriched in Hypoxic Secretome of Candida albicans Exerts an Immunomodulatory Effect via Regulating Macrophage Function
Source: Cells. 2024 Jan 10;13(2):127. doi: 10.3390/cells13020127 (PMC10814802; doi:10.3390/cells13020127)
Supplement: Supplementary file 1 [file cells-13-00127-s001.zip › Table S3.xlsx]

## Sheet: Statistics
Table S3 Protain indetified in NS and HS of C. albicans
ID	Protein name	Gene symbol	UniProt ID	Probability	Average (Hypo)	Average (Normo)	Std. dev. (Hypo)	Std. dev. (Normo)	Fold change	CV (Hypo)	CV (Normo)	N (Hypo)	N (Normo)	p1	p1(corr)	|p1(corr)|
tr|Q5AMP4|Q5AMP4_CANAL	Malate dehydrogenase	MDH1-1	Q5AMP4	1.29345e-06	572863	10422300	335725	150421	18.1934	0.586048	0.0144325	3	3	0.106985	0.999052	0.999052
tr|Q5A389|Q5A389_CANAL	Ribosomal 40S subunit protein S20	RPS20	Q5A389	1.6495e-05	105173	2312600	97944.2	121571	21.9885	0.931267	0.0525689	3	3	0.0505854	0.996626	0.996626
sp|P46587|HSP72_CANAL	Heat shock protein SSA2	SSA2	P46587	6.25923e-05	1028320	9084170	653618	456559	8.83402	0.635619	0.0502587	3	3	0.0964908	0.993558	0.993558
tr|A0A1D8PK61|A0A1D8PK61_CANAL	Ribosomal 40S subunit protein S19A	RPS19A	A0A1D8PK61	6.34519e-05	16865.4	715437	16737.3	67326.8	42.4204	0.992406	0.0941058	3	3	0.0284134	0.993508	0.993508
tr|A0A1D8PKZ9|A0A1D8PKZ9_CANAL	ATP synthase subunit beta	ATP2	A0A1D8PKZ9	0.000140139	2697770	22133000	1490430	1828850	8.20419	0.55247	0.0826298	3	3	0.149613	0.990225	0.990225
tr|A0A1D8PG16|A0A1D8PG16_CANAL	Ribosomal 60S subunit protein L38	RPL38	A0A1D8PG16	0.000191574	4347.77	169420	5484.18	20992.7	38.9671	1.26138	0.123909	3	3	0.0137774	0.988621	0.988621
tr|A0A1D8PTD1|A0A1D8PTD1_CANAL	Aspartate carbamoyltransferase	URA2	A0A1D8PTD1	0.000215387	185420	509633	31559.6	30525.4	2.74853	0.170206	0.0598968	3	3	0.0193023	0.987965	0.987965
tr|A0A1D8PFK5|A0A1D8PFK5_CANAL	Chitin synthase	CHS3	A0A1D8PFK5	0.000254848	225197	1139200	27388	126276	5.05869	0.121618	0.110846	3	3	0.0323924	0.986927	0.986927
sp|Q5A860|TCTP_CANAL	Translationally-controlled tumor protein homolog	TMA19	Q5A860	0.000315423	103104	3793600	50873.7	548624	36.7939	0.493421	0.144618	3	3	0.0650444	0.985506	0.985506
tr|A0A1D8PTP9|A0A1D8PTP9_CANAL	Chaperone ATPase	HSP104	A0A1D8PTP9	0.000321637	1066340	204730	121762	43443.4	0.191993	0.114187	0.212199	3	3	-0.0314201	-0.985173	0.985173
tr|Q5A5V6|Q5A5V6_CANAL	Pyruvate dehydrogenase E1 component subunit beta	PDB1	Q5A5V6	0.0003773	78070	506420	11518.3	65959.3	6.48674	0.147538	0.130246	3	3	0.0221413	0.983999	0.983999
tr|A0A1D8PI19|A0A1D8PI19_CANAL	Phm7p	PHM7	A0A1D8PI19	0.000469699	1727600	6580570	629634	497638	3.80908	0.364456	0.0756224	3	3	0.0744585	0.982186	0.982186
tr|A0A1D8PPB1|A0A1D8PPB1_CANAL	Ardp	ARD	A0A1D8PPB1	0.000523183	340400	2026770	60389.8	280309	5.95407	0.177408	0.138303	3	3	0.043874	0.981286	0.981286
tr|Q5AD47|Q5AD47_CANAL	Hexose transporter	HGT6	Q5AD47	0.00055285	252157	1545930	21502.9	222102	6.13084	0.0852759	0.143669	3	3	0.0384196	0.98078	0.98078
sp|P83784|HSP77_CANAL	Heat shock protein SSC1, mitochondrial	SSC1	P83784	0.000634302	280633	2820330	88341.6	445190	10.0499	0.314794	0.15785	3	3	0.0537915	0.979414	0.979414
tr|A0A1D8PJB0|A0A1D8PJB0_CANAL	Coatomer subunit alpha	orf19.1672	A0A1D8PJB0	0.000731482	1309530	0	242834	0	0	0.185436		3	3	-0.0386021	-0.97804	0.97804
tr|A0A1D8PFG4|A0A1D8PFG4_CANAL	60S ribosomal protein L27	RPL27A	A0A1D8PFG4	0.000873084	464953	1896530	140617	239771	4.07898	0.302432	0.126426	3	3	0.0403151	0.975902	0.975902
tr|Q5ADX4|Q5ADX4_CANAL	Putative serine hydrolase	orf19.6717	Q5ADX4	0.000931471	92887.7	620487	53118.9	89625.2	6.67997	0.571862	0.144443	3	3	0.0244638	0.975082	0.975082
sp|P0CY19|DUT_CANAL	Deoxyuridine 5'-triphosphate nucleotidohydrolase	DUT1	P0CY19	0.00110562	5937.67	110770	10284.3	19050.3	18.6555	1.73205	0.171981	3	3	0.0108878	0.972428	0.972428
tr|Q59VN4|Q59VN4_CANAL	Histone H4	HHF1	Q59VN4	0.00116174	0	152840	0	31975.1			0.209206	3	3	0.0131463	0.972071	0.972071
sp|Q59RP7|RM04_CANAL	54S ribosomal protein L4, mitochondrial	MRPL4	Q59RP7	0.00116927	31968	144970	15575.8	17837.5	4.53485	0.487232	0.123043	3	3	0.0112996	0.97166	0.97166
sp|P83781|VDAC_CANAL	Mitochondrial outer membrane protein porin	POR1	P83781	0.00119674	203727	1917970	210416	293867	9.4144	1.03283	0.153218	3	3	0.0440208	0.971721	0.971721
sp|Q5A044|MIC60_CANAL	MICOS complex subunit MIC60	MIC60	Q5A044	0.00132415	27452	184267	11692.8	31876.1	6.71232	0.425938	0.172989	3	3	0.0133007	0.969993	0.969993
tr|A0A1D8PDL7|A0A1D8PDL7_CANAL	Uncharacterized protein	orf19.2489	A0A1D8PDL7	0.00133539	459023	3422870	21678.9	642786	7.45685	0.0472283	0.187792	3	3	0.057831	0.970048	0.970048
sp|Q9B8D8|COX2_CANAL	Cytochrome c oxidase subunit 2	COX2	Q9B8D8	0.00144356	104639	1883300	40756.9	391849	17.9981	0.389501	0.208065	3	3	0.0447732	0.968866	0.968866
sp|Q96W54|RS22A_CANAL	40S ribosomal protein S22-A	RPS22A	Q96W54	0.00146325	4639130	8487800	708510	479484	1.82961	0.152725	0.056491	3	3	0.0658789	0.969026	0.969026
tr|A0A1D8PMV9|A0A1D8PMV9_CANAL	Threonyl-tRNA synthetase	THS1	A0A1D8PMV9	0.00173512	79353.3	772427	137444	84147.2	9.73402	1.73205	0.108939	3	3	0.0279157	0.966214	0.966214
tr|A0A1D8PGE3|A0A1D8PGE3_CANAL	UV excision repair protein RAD23	RAD23	A0A1D8PGE3	0.00190608	34487.5	728163	51574.1	157120	21.1139	1.49544	0.215776	3	3	0.0278859	0.963935	0.963935
tr|Q5APK5|Q5APK5_CANAL	Cytochrome c oxidase subunit Va	COX5	Q5APK5	0.00190666	108437	2068830	27544.9	466572	19.0786	0.254017	0.225524	3	3	0.0468906	0.96417	0.96417
tr|A0A1D8PKV4|A0A1D8PKV4_CANAL	Fumarate hydratase	FUM12	A0A1D8PKV4	0.0020832	74119.4	770917	113135	127002	10.401	1.52639	0.164742	3	3	0.0279337	0.962601	0.962601
tr|A0A1D8PU51|A0A1D8PU51_CANAL	Uncharacterized protein	CAALFM_CR10140WA	A0A1D8PU51	0.00231039	67924	366913	55422.8	50569.2	5.40182	0.815953	0.137823	3	3	0.0182748	0.960379	0.960379
tr|A0A1D8PER8|A0A1D8PER8_CANAL	ER oxidoreductin	ERO1	A0A1D8PER8	0.00237723	49661.3	242770	17124.8	45726.8	4.88851	0.344833	0.188354	3	3	0.0146881	0.96018	0.96018
sp|Q59NX9|DPH51_CANAL	Diphthine methyl ester synthase 1	DPH5	Q59NX9	0.0023776	97836.3	1433570	87699.1	326175	14.6527	0.896386	0.227527	3	3	0.0386224	0.959993	0.959993
tr|A0A1D8PD11|A0A1D8PD11_CANAL	Uncharacterized protein	orf19.3053	A0A1D8PD11	0.00295637	435803	1071900	161494	54808.5	2.4596	0.370566	0.0511321	3	3	0.0266052	0.955961	0.955961
tr|A0A1D8PJD7|A0A1D8PJD7_CANAL	GTPase-activating protein	RNA1	A0A1D8PJD7	0.00317446	39091.7	242923	34192.6	43981.6	6.2142	0.874678	0.181051	3	3	0.0150353	0.953538	0.953538
tr|A0A1D8PGT0|A0A1D8PGT0_CANAL	Protein-arginine N-methyltransferase	orf19.5783	A0A1D8PGT0	0.00321012	32964.3	337707	50467.8	66574.3	10.2446	1.53098	0.197136	3	3	0.0183841	0.953407	0.953407
sp|Q5AIR7|ENG1_CANAL	Endo-1,3(4)-beta-glucanase 1	ENG1	Q5AIR7	0.00350705	1667070	223121	355770	194463	0.133841	0.21341	0.871559	3	3	-0.0399636	-0.951059	0.951059
tr|A0A1D8PFR4|A0A1D8PFR4_CANAL	Actin	ACT1	A0A1D8PFR4	0.00351683	15336000	1763530	2283820	3054530	0.114993	0.148919	1.73205	3	3	-0.122551	-0.951239	0.951239
sp|P0CY34|TUP1_CANAL	Transcriptional repressor TUP1	TUP1	P0CY34	0.00381346	509450	2057900	310371	318639	4.03945	0.609227	0.154837	3	3	0.0413632	0.949518	0.949518
tr|Q5A1X9|Q5A1X9_CANAL	5'-deoxynucleotidase	CAALFM_CR03020CA	Q5A1X9	0.00399528	81764.7	887390	67891.4	224341	10.853	0.830327	0.25281	3	3	0.0298034	0.947894	0.947894
tr|A0A1D8PEW1|A0A1D8PEW1_CANAL	Gca2p	GCA2	A0A1D8PEW1	0.00411535	4745.4	945.673	1046.61	382.986	0.199282	0.220552	0.404988	3	3	-0.00204592	-0.947098	0.947098
tr|Q5ADM7|Q5ADM7_CANAL	Glyceraldehyde-3-phosphate dehydrogenase	TDH3	Q5ADM7	0.00424722	137837000	30328700	30703800	8300580	0.220033	0.222755	0.273688	3	3	-0.343879	-0.945959	0.945959
tr|A0A1D8PG14|A0A1D8PG14_CANAL	CTP:phosphoethanolamine cytidylyltransferase	MUQ1	A0A1D8PG14	0.00466918	453557	49651.3	114473	44014.1	0.109471	0.252391	0.886464	3	3	-0.0210608	-0.943883	0.943883
tr|A0A1D8PKU6|A0A1D8PKU6_CANAL	Uncharacterized protein	EVP1	A0A1D8PKU6	0.00492343	3945800	893013	588087	734092	0.22632	0.149041	0.82204	3	3	-0.0578226	-0.941847	0.941847
sp|P41797|HSP71_CANAL	Heat shock protein SSA1	SSA1	P41797	0.00499562	413440	155067	74329.7	29389.2	0.375064	0.179784	0.189526	3	3	-0.0168098	-0.94096	0.94096
tr|A0A1D8PL99|A0A1D8PL99_CANAL	40S ribosomal protein S6	RPS6A	A0A1D8PL99	0.00521156	468470	1768730	327779	241226	3.77555	0.69968	0.136384	3	3	0.0377196	0.940575	0.940575
tr|A0A1D8PN83|A0A1D8PN83_CANAL	Ribosomal 40S subunit protein S11A	orf19.4149.1	A0A1D8PN83	0.00533442	187928	908893	150699	169920	4.83639	0.8019	0.186953	3	3	0.028075	0.939815	0.939815
tr|A0A1D8PPN6|A0A1D8PPN6_CANAL	Ribosomal 60S subunit protein L32	RPL32	A0A1D8PPN6	0.00540479	393617	1340270	99867.8	282147	3.405	0.253718	0.210516	3	3	0.0321557	0.939182	0.939182
tr|A0A1D8PQM9|A0A1D8PQM9_CANAL	Glutaminyl-tRNA synthetase	GLN4	A0A1D8PQM9	0.00571349	514690	1804200	151774	385219	3.50541	0.294885	0.213512	3	3	0.0375069	0.937749	0.937749
sp|Q5AGD1|APTH1_CANAL	Acyl-protein thioesterase 1	CAALFM_C502400WA	Q5AGD1	0.00592912	11637.3	238260	12438.4	72459.4	20.4738	1.06884	0.304119	3	3	0.01571	0.936351	0.936351
tr|A0A1D8PJK5|A0A1D8PJK5_CANAL	D-lactate dehydrogenase	AIP2	A0A1D8PJK5	0.00597762	58651	275807	43261.5	55802.9	4.70251	0.737609	0.202326	3	3	0.0153842	0.936577	0.936577
tr|Q5A0L0|Q5A0L0_CANAL	Ribonucleotide-diphosphate reductase subunit	RNR21	Q5A0L0	0.00601182	2687170	506477	159699	691992	0.18848	0.0594303	1.36629	3	3	-0.048715	-0.935787	0.935787
tr|A0A1D8PNF5|A0A1D8PNF5_CANAL	Translation initiation factor eIF5	TIF5	A0A1D8PNF5	0.00622041	82520	371883	83899.4	44857.2	4.50658	1.01672	0.120622	3	3	0.0177432	0.93511	0.93511
sp|Q92209|KHSE_CANAL	Homoserine kinase	THR1	Q92209	0.00701376	7480	52713.7	12955.7	8290.77	7.04728	1.73205	0.157279	3	3	0.00699293	0.930106	0.930106
sp|Q59QC4|KYNU_CANAL	Kynureninase	BNA5	Q59QC4	0.00789667	34394.3	89711.7	2013.26	19346.8	2.60833	0.0585346	0.215655	3	3	0.00772187	0.926606	0.926606
tr|A0A1D8PSE1|A0A1D8PSE1_CANAL	Mlc1p	MLC1	A0A1D8PSE1	0.00805047	35161	0	12431.5	0	0	0.353561		3	3	-0.00614729	-0.924883	0.924883
sp|Q5APF2|GUAA_CANAL	GMP synthase [glutamine-hydrolyzing]	GUA1	Q5APF2	0.00807213	682120	2127830	330095	390778	3.11944	0.483925	0.183651	3	3	0.0394704	0.926065	0.926065
tr|Q5ANA1|Q5ANA1_CANAL	60S ribosomal protein L8	RPL8B	Q5ANA1	0.00811038	5398970	1063080	1397730	637462	0.196904	0.258889	0.599638	3	3	-0.0682733	-0.924869	0.924869
tr|Q5A516|Q5A516_CANAL	ADP/ATP translocase	PET9	Q5A516	0.00844859	391590	19616700	189139	6888620	50.0949	0.483003	0.351162	3	3	0.143755	0.924043	0.924043
tr|A0A1D8PQ55|A0A1D8PQ55_CANAL	Uncharacterized protein	orf19.5627	A0A1D8PQ55	0.00868988	33647.7	174123	3836.06	50614.3	5.1749	0.114007	0.290681	3	3	0.0122796	0.92285	0.92285
tr|Q5A7K0|Q5A7K0_CANAL	40S ribosomal protein S24	RPS24	Q5A7K0	0.00881044	3055230	6087730	816766	736940	1.99256	0.267333	0.121053	3	3	0.0570451	0.922437	0.922437
tr|Q59ZE0|Q59ZE0_CANAL	ATP synthase subunit 4	ATP4	Q59ZE0	0.00910588	34408.3	83936	11924.3	13666.4	2.43941	0.346553	0.16282	3	3	0.00727905	0.920368	0.920368
tr|Q5A015|Q5A015_CANAL	Flavin mononucleotide kinase 1	CAALFM_CR03740CA	Q5A015	0.00911066	18727	55265.7	9024.62	9881.88	2.95112	0.481904	0.178807	3	3	0.0062568	0.921048	0.921048
sp|P0DJ06|CARP2_CANAL	Candidapepsin-2	SAP2	P0DJ06	0.00921249	990527	1939130	346679	36014.6	1.95768	0.349995	0.0185725	3	3	0.0318574	0.920169	0.920169
tr|Q5A362|Q5A362_CANAL	Cystathionine gamma-lyase	CYS3	Q5A362	0.00952016	116490	345760	34622.4	77671.4	2.96816	0.297214	0.22464	3	3	0.0156645	0.91966	0.91966
sp|Q5A0E2|XPOT_CANAL	Exportin-T	LOS1	Q5A0E2	0.00966959	50018.3	460893	44056	146605	9.21449	0.880796	0.318089	3	3	0.0209471	0.918338	0.918338
sp|Q59Y31|YWP1_CANAL	Yeast-form wall Protein 1	YWP1	Q59Y31	0.0098558	27433000	4261730	7295890	4703410	0.155351	0.265953	1.10364	3	3	-0.157409	-0.918549	0.918549
tr|Q59TZ8|Q59TZ8_CANAL	Phosphotransferase	GLK1	Q59TZ8	0.0100513	874967	4080900	903868	801199	4.66406	1.03303	0.196329	3	3	0.0585144	0.917568	0.917568
tr|A0A1D8PGT5|A0A1D8PGT5_CANAL	Aldehyde dehydrogenase (NAD(P)(+))	ALD5	A0A1D8PGT5	0.0102798	427737	3091070	116063	1003260	7.22656	0.271343	0.324569	3	3	0.0532816	0.916203	0.916203
tr|A0A1D8PJL8|A0A1D8PJL8_CANAL	Purine nucleoside phosphorylase	PNP1	A0A1D8PJL8	0.011029	111410	549447	102847	134768	4.93177	0.92314	0.245279	3	3	0.0215737	0.913213	0.913213
tr|A0A1D8PSH3|A0A1D8PSH3_CANAL	Citrate synthase	CIT1	A0A1D8PSH3	0.0110376	407193	1753930	415439	314953	4.30737	1.02025	0.17957	3	3	0.0378202	0.913013	0.913013
sp|O13289|CATA_CANAL	Peroxisomal catalase	CAT1	O13289	0.0110996	5471.33	531377	1381.83	203908	97.1201	0.252559	0.383735	3	3	0.0236293	0.912709	0.912709
tr|Q5ADQ6|Q5ADQ6_CANAL	40S ribosomal protein S12	RPS12	Q5ADQ6	0.0123222	3677330	28088000	1545180	9635050	7.63814	0.420191	0.343031	3	3	0.160573	0.907993	0.907993
tr|A0A1D8PK43|A0A1D8PK43_CANAL	Ribosomal 60S subunit protein L18A	RPL18	A0A1D8PK43	0.0124438	154720	0	62027.8	0	0	0.400903		3	3	-0.0127941	-0.908504	0.908504
tr|A0A1D8PF54|A0A1D8PF54_CANAL	Phosphate transporter	PHO84	A0A1D8PF54	0.0129613	237087	5582830	27174.5	2168790	23.5476	0.114619	0.388475	3	3	0.0750461	0.905629	0.905629
tr|Q5A1E8|Q5A1E8_CANAL	Succinate dehydrogenase [ubiquinone] flavoprotein subunit, mitochondrial	SDH12	Q5A1E8	0.0132431	85916.7	1337320	7289.39	510918	15.5654	0.0848426	0.382045	3	3	0.0362893	0.9046	0.9046
tr|A0A1D8PH52|A0A1D8PH52_CANAL	Acetyl-CoA C-acetyltransferase	ERG10	A0A1D8PH52	0.0137901	110140	556890	53806.6	176596	5.0562	0.488529	0.317111	3	3	0.0216545	0.902435	0.902435
tr|Q5A2T2|Q5A2T2_CANAL	ATP-binding cassette family ATPase	KRE30	Q5A2T2	0.0138776	87608	153040	13443.9	23517.9	1.74687	0.153455	0.153672	3	3	0.00828933	0.902503	0.902503
tr|A0A1D8PR99|A0A1D8PR99_CANAL	Protein disulfide-isomerase	PDI1	A0A1D8PR99	0.0144539	425170	1134280	230249	187828	2.66782	0.541545	0.165593	3	3	0.0272378	0.899805	0.899805
tr|Q59R20|Q59R20_CANAL	Prolyl-tRNA synthetase	orf19.6701	Q59R20	0.0150921	408217	1526670	188618	435670	3.73984	0.462054	0.285373	3	3	0.0341805	0.897978	0.897978
tr|A0A1D8PTB5|A0A1D8PTB5_CANAL	Succinate--CoA ligase [ADP-forming] subunit beta, mitochondrial	LSC2	A0A1D8PTB5	0.0155343	25638.3	627720	38359.7	254912	24.4837	1.49619	0.406091	3	3	0.0250558	0.896419	0.896419
tr|A0A1D8PRI0|A0A1D8PRI0_CANAL	Nicotinate phosphoribosyltransferase	NPT1	A0A1D8PRI0	0.017119	29701.6	222923	27352.9	80670.6	7.50542	0.920924	0.361876	3	3	0.0141517	0.891119	0.891119
sp|Q59NB8|LKHA4_CANAL	Leucine aminopeptidase 2	LKH1	Q59NB8	0.0173584	1128050	2316370	365555	378315	2.05342	0.324059	0.163323	3	3	0.0351105	0.891122	0.891122
tr|A0A1D8PDD1|A0A1D8PDD1_CANAL	Lipid-binding protein	PIL1	A0A1D8PDD1	0.017456	304890	827037	189198	133490	2.71257	0.620545	0.161408	3	3	0.0232495	0.890032	0.890032
tr|Q5AP79|Q5AP79_CANAL	Mir1p	MIR1	Q5AP79	0.0181129	209398	1851570	167609	717119	8.84232	0.800432	0.387304	3	3	0.041193	0.888164	0.888164
tr|A0A1D8PCX8|A0A1D8PCX8_CANAL	60S ribosomal protein L6	RPL6	A0A1D8PCX8	0.0185016	1940430	8900300	643451	3074860	4.58676	0.331601	0.345478	3	3	0.0847462	0.886952	0.886952
tr|Q5A3K7|Q5A3K7_CANAL	Phosphoglycerate dehydrogenase	SER33	Q5A3K7	0.0192307	8055.3	1120.88	3031.89	915.651	0.139149	0.376385	0.816901	3	3	-0.00267324	-0.88524	0.88524
tr|Q5A8J5|Q5A8J5_CANAL	Glucose-inactivated glycerol proton symporter	HGT10	Q5A8J5	0.0194919	40077	256457	7751.39	98932.8	6.3991	0.193413	0.385768	3	3	0.0149118	0.883593	0.883593
tr|Q5ADV2|Q5ADV2_CANAL	Phosphoribomutase	orf19.6739	Q5ADV2	0.0199738	18552.3	284303	32133.6	118517	15.3244	1.73205	0.416867	3	3	0.0165154	0.882316	0.882316
sp|P13649|PYRF_CANAL	Orotidine 5'-phosphate decarboxylase	URA3	P13649	0.0210328	5119.67	866.193	1988.52	183.288	0.169189	0.388409	0.211602	3	3	-0.00208413	-0.878518	0.878518
tr|A0A1D8PJ64|A0A1D8PJ64_CANAL	Arf3p	ARF3	A0A1D8PJ64	0.0210509	153627	275993	50726.2	27001.3	1.79652	0.330191	0.0978333	3	3	0.0111738	0.878117	0.878117
sp|Q9URB4|ALF_CANAL	Fructose-bisphosphate aldolase	FBA1	Q9URB4	0.0214625	1270160	8046630	939807	3060400	6.33515	0.739915	0.380333	3	3	0.083177	0.877785	0.877785
sp|Q5AI15|PABP_CANAL	Polyadenylate-binding protein, cytoplasmic and nuclear	PAB1	Q5AI15	0.0223292	44470.6	1810070	33683.8	843778	40.7025	0.757441	0.466159	3	3	0.0423994	0.875353	0.875353
tr|Q5AFB4|Q5AFB4_CANAL	Gst2p	GST2	Q5AFB4	0.0224872	285303	91049	91718.1	16052.9	0.319131	0.321476	0.17631	3	3	-0.0140425	-0.873806	0.873806
tr|A0A1D8PH17|A0A1D8PH17_CANAL	V-type proton ATPase subunit F	VMA7	A0A1D8PH17	0.0238332	14012.9	185804	18656.9	81753.4	13.2595	1.33141	0.439999	3	3	0.0131947	0.871198	0.871198
tr|Q59MZ5|Q59MZ5_CANAL	Formylglycinamide ribonucleotide amidotransferase	ADE6	Q59MZ5	0.0246458	912143	3503630	135553	1271170	3.8411	0.148609	0.362814	3	3	0.0511809	0.868951	0.868951
tr|Q5AG68|Q5AG68_CANAL	Nucleoside diphosphate kinase	YNK1	Q5AG68	0.0248797	1819290	76943000	901489	37157900	42.2929	0.495517	0.482927	3	3	0.275416	0.86817	0.86817
tr|Q5AGX8|Q5AGX8_CANAL	Acetyltransferase component of pyruvate dehydrogenase complex	LAT1	Q5AGX8	0.0251724	120837	830123	163668	311896	6.86976	1.35445	0.375722	3	3	0.0267562	0.867598	0.867598
tr|Q5ANH5|Q5ANH5_CANAL	Ribosomal protein P2B	RPP2B	Q5ANH5	0.0259556	136157	1152000	9435.45	509296	8.46084	0.0692985	0.442097	3	3	0.0319786	0.86542	0.86542
sp|Q5AEM8|PAM17_CANAL	Presequence translocated-associated motor subunit PAM17, mitochondrial	PAM17	Q5AEM8	0.026261	29138.7	4407.8	11775	4035.01	0.15127	0.404101	0.915426	3	3	-0.00499086	-0.865233	0.865233
tr|Q5AI00|Q5AI00_CANAL	Rab family GTPase	YPT1	Q5AI00	0.0269807	471090	276260	40491.3	90237.7	0.586427	0.0859523	0.326641	3	3	-0.0139773	-0.862376	0.862376
tr|A0A1D8PSA9|A0A1D8PSA9_CANAL	Phosphoglucomutase	PGM2	A0A1D8PSA9	0.027166	418522	1602230	393177	456168	3.82831	0.939442	0.284707	3	3	0.0344489	0.862053	0.862053
sp|P82611|ACON_CANAL	Aconitate hydratase, mitochondrial	ACO1	P82611	0.0273953	303677	2148930	26120.9	940957	7.07639	0.0860156	0.437872	3	3	0.0430098	0.861729	0.861729
tr|A0A1D8PTH3|A0A1D8PTH3_CANAL	Dihydrolipoyllysine-residue succinyltransferase	KGD2	A0A1D8PTH3	0.027613	55364.7	194467	16636	69167.2	3.51247	0.30048	0.355676	3	3	0.0118074	0.861344	0.861344
tr|A0A1D8PSC8|A0A1D8PSC8_CANAL	Arc1p	ARC1	A0A1D8PSC8	0.0283628	181643	470893	77360.2	127582	2.59241	0.42589	0.270936	3	3	0.0169887	0.858475	0.858475
tr|Q5AGZ8|Q5AGZ8_CANAL	ATP-dependent 6-phosphofructokinase	PFK2	Q5AGZ8	0.0305474	820200	302820	255612	96852.6	0.369203	0.311646	0.319835	3	3	-0.0226496	-0.853053	0.853053
tr|A0A1D8PM75|A0A1D8PM75_CANAL	Ribosomal 60S subunit protein L30	RPL30	A0A1D8PM75	0.0323236	827217	5656200	663403	2512560	6.83763	0.80197	0.444213	3	3	0.0690766	0.849423	0.849423
tr|A0A1D8PS79|A0A1D8PS79_CANAL	Isocitrate dehydrogenase [NADP]	IDP2	A0A1D8PS79	0.0327445	6668330	1929370	2378950	948429	0.289333	0.356754	0.491575	3	3	-0.0683739	-0.848229	0.848229
tr|A0A1D8PDC4|A0A1D8PDC4_CANAL	ATP synthase subunit alpha	ATP1	A0A1D8PDC4	0.0330663	1834000	15677600	965571	7443060	8.54834	0.526485	0.474756	3	3	0.116832	0.847628	0.847628
tr|A0A1D8PPG2|A0A1D8PPG2_CANAL	ADF-H domain-containing protein	orf19.4193	A0A1D8PPG2	0.0331962	16279.3	706277	14718.6	374279	43.3849	0.904131	0.529933	3	3	0.0260818	0.847431	0.847431
tr|A0A1D8PHC9|A0A1D8PHC9_CANAL	Aspartate transaminase	AAT1	A0A1D8PHC9	0.0336854	1352790	205423	590747	206666	0.151852	0.436689	1.00605	3	3	-0.0336073	-0.846207	0.846207
sp|Q59KI0|UGP1_CANAL	UTP--glucose-1-phosphate uridylyltransferase	UGP1	Q59KI0	0.0340803	1207670	579593	340131	50879.7	0.479927	0.281642	0.0877851	3	3	-0.0248287	-0.844511	0.844511
tr|A0A1D8PF08|A0A1D8PF08_CANAL	Ribosomal 60S subunit protein L2A	RPL2	A0A1D8PF08	0.034618	643300	5271	351055	9129.64	0.00819369	0.54571	1.73205	3	3	-0.025016	-0.843594	0.843594
tr|A0A1D8PGN7|A0A1D8PGN7_CANAL	Hypoxanthine phosphoribosyltransferase	HPT1	A0A1D8PGN7	0.0352796	5713530	1496230	2246660	639129	0.261875	0.393217	0.427159	3	3	-0.064287	-0.842459	0.842459
sp|Q8NJN3|ACS2_CANAL	Acetyl-coenzyme A synthetase 2	ACS2	Q8NJN3	0.0353558	113303	252813	15889.8	75674.3	2.2313	0.140241	0.299329	3	3	0.0116898	0.842176	0.842176
sp|O93827|MPG1_CANAL	Mannose-1-phosphate guanyltransferase	MPG1	O93827	0.0375168	1613630	943250	343920	159198	0.58455	0.213134	0.168776	3	3	-0.0255243	-0.836421	0.836421
tr|A0A1D8PQW6|A0A1D8PQW6_CANAL	Transcription factor TFIIIC subunit	orf19.6559	A0A1D8PQW6	0.0377616	44901.3	135106	39216.6	32768.9	3.00895	0.873396	0.242543	3	3	0.00936957	0.836752	0.836752
sp|P31353|PMM_CANAL	Phosphomannomutase	PMM1	P31353	0.0382851	4411930	12679300	4443600	1548120	2.87387	1.00718	0.122098	3	3	0.0897575	0.836714	0.836714
tr|A0A1D8PH08|A0A1D8PH08_CANAL	Cytochrome c oxidase subunit VI	COX6	A0A1D8PH08	0.0393722	39489.3	151913	28780.9	57827.7	3.84695	0.728826	0.380662	3	3	0.0104426	0.833584	0.833584
sp|Q59S59|MRH4_CANAL	ATP-dependent RNA helicase MRH4, mitochondrial	MRH4	Q59S59	0.0401876	2969900	528860	1406790	124233	0.178073	0.473681	0.234907	3	3	-0.0486243	-0.832096	0.832096
tr|A0A1D8PSI3|A0A1D8PSI3_CANAL	Uncharacterized protein	CAALFM_CR03520CA	A0A1D8PSI3	0.040212	90136.7	437367	156121	126488	4.85226	1.73205	0.289204	3	3	0.0183447	0.832332	0.832332
tr|Q59TB4|Q59TB4_CANAL	Uncharacterized protein	orf19.4517	Q59TB4	0.0407635	68977.3	4644.2	37269.8	3113.94	0.0673294	0.54032	0.670501	3	3	-0.00789476	-0.831582	0.831582
tr|Q5AG89|Q5AG89_CANAL	Thioredoxin reductase	TRR1	Q5AG89	0.0414815	229472	1218020	216182	536164	5.30793	0.942085	0.440193	3	3	0.0308777	0.828949	0.828949
tr|A0A1D8PJD2|A0A1D8PJD2_CANAL	Deoxyhypusine synthase	orf19.1626	A0A1D8PJD2	0.0425503	642123	228080	140295	199930	0.355197	0.218486	0.876579	3	3	-0.0199456	-0.826252	0.826252
tr|Q59WJ7|Q59WJ7_CANAL	Uncharacterized protein	orf19.2304	Q59WJ7	0.0429246	184043	438317	63005.7	136616	2.38159	0.342342	0.311684	3	3	0.0156351	0.8261	0.8261
tr|A0A1D8PS16|A0A1D8PS16_CANAL	Phenylalanyl-tRNA synthetase beta subunit	FRS1	A0A1D8PS16	0.0446628	208620	641683	103783	238112	3.07585	0.497474	0.371074	3	3	0.0203557	0.822319	0.822319
tr|Q5ADU2|Q5ADU2_CANAL	Lysine--tRNA ligase	KRS1	Q5ADU2	0.0452395	2724470	8960270	760899	3678890	3.28882	0.279284	0.410578	3	3	0.0771863	0.821131	0.821131
sp|Q5A3V6|RIB3_CANAL	3,4-dihydroxy-2-butanone 4-phosphate synthase	RIB3	Q5A3V6	0.0459837	377657	967057	228977	274017	2.56068	0.60631	0.283352	3	3	0.0237035	0.819455	0.819455
tr|A0A1D8PT56|A0A1D8PT56_CANAL	Adenylosuccinate lyase	ADE13	A0A1D8PT56	0.0460394	156864	7817.13	90321.3	1806.88	0.0498338	0.575794	0.231144	3	3	-0.0119032	-0.818257	0.818257
tr|Q5A7Q4|Q5A7Q4_CANAL	Uncharacterized protein	orf19.5412	Q5A7Q4	0.0465712	9455500	2667270	3948580	1213600	0.282086	0.417596	0.454996	3	3	-0.0804349	-0.818781	0.818781
tr|Q5AJ93|Q5AJ93_CANAL	40S ribosomal protein S7	RPS7A	Q5AJ93	0.0466783	749437	2120500	421552	720782	2.82946	0.562492	0.339911	3	3	0.0361386	0.81844	0.81844
tr|A0A1D8PE78|A0A1D8PE78_CANAL	Importin-alpha export receptor	orf19.1229	A0A1D8PE78	0.0479252	5368.5	691.66	2810.55	603.227	0.128837	0.523527	0.872144	3	3	-0.00210892	-0.816514	0.816514
sp|Q9UVJ4|RL10A_CANAL	60S ribosomal protein L10a	RPL10A	Q9UVJ4	0.0488093	195745	6726130	142316	4037060	34.3617	0.727044	0.600205	3	3	0.0786281	0.813809	0.813809
sp|P29717|EXG1_CANAL	Glucan 1,3-beta-glucosidase	XOG1	P29717	0.0502527	500843	160030	181543	111386	0.319522	0.362475	0.696028	3	3	-0.0179027	-0.809687	0.809687
tr|Q59US5|Q59US5_CANAL	Bifunctional cysteine synthase/O-acetylhomoserine aminocarboxypropyltransferase	MET15	Q59US5	0.052208	613407	1769020	134897	719473	2.88392	0.219914	0.406708	3	3	0.0329361	0.807071	0.807071
tr|A0A1D8PFV1|A0A1D8PFV1_CANAL	Ribosomal 60S subunit protein L4B	RPL4B	A0A1D8PFV1	0.0564045	2522200	4946930	1060510	1169850	1.96136	0.420472	0.23648	3	3	0.0474627	0.798976	0.798976
tr|A0A1D8PJ26|A0A1D8PJ26_CANAL	Oxoglutarate dehydrogenase (succinyl-transferring)	KGD1	A0A1D8PJ26	0.0564485	297217	869187	57006.3	368188	2.92442	0.191801	0.423601	3	3	0.0230583	0.799158	0.799158
sp|Q5AGV4|EIF3B_CANAL	Eukaryotic translation initiation factor 3 subunit B	PRT1	Q5AGV4	0.0589277	10546.3	89568	9136.67	51477.2	8.49281	0.866336	0.574727	3	3	0.00854379	0.794392	0.794392
sp|Q59YF0|SSO2_CANAL	Protein transport protein SSO2	SSO2	Q59YF0	0.0600186	2857770	822943	755990	1124860	0.287967	0.264539	1.36688	3	3	-0.0433066	-0.79252	0.79252
sp|A0A1D8PCL1|HGT1_CANAL	High-affinity glucose transporter 1	HGT1	A0A1D8PCL1	0.0600496	111710	640780	55118.6	348119	5.7361	0.493408	0.543274	3	3	0.0220856	0.792604	0.792604
tr|Q5AK79|Q5AK79_CANAL	CTP synthase	URA7	Q5AK79	0.0613285	85905.3	299303	34200.5	139121	3.48411	0.398118	0.464816	3	3	0.0140057	0.790292	0.790292
sp|O42766|1433_CANAL	14-3-3 protein homolog	BMH1	O42766	0.0616352	449222	6964500	344188	4368460	15.5035	0.766188	0.627247	3	3	0.0773543	0.789672	0.789672
sp|Q5AAH2|CHI1_CANAL	Chitinase 1	CHT1	Q5AAH2	0.0620379	118037	681663	83235.8	370760	5.77498	0.705165	0.543905	3	3	0.0227504	0.789271	0.789271
sp|O42817|RSSA_CANAL	40S ribosomal protein S0	RPS0	O42817	0.0621486	1086310	6535070	173489	3671800	6.01586	0.159706	0.561861	3	3	0.0707135	0.788919	0.788919
tr|A0A1D8PI76|A0A1D8PI76_CANAL	Protein YOP1	orf19.2168.3	A0A1D8PI76	0.0645954	4197970	2085170	1370150	461717	0.496709	0.326385	0.221429	3	3	-0.0439854	-0.785918	0.785918
tr|A0A1D8PFL7|A0A1D8PFL7_CANAL	26S proteasome regulatory subunit RPN1	RPN1	A0A1D8PFL7	0.0660325	146252	385587	88536.6	139391	2.63645	0.605368	0.361503	3	3	0.0147547	0.782056	0.782056
sp|Q59WF4|MNN2_CANAL	Alpha-1,2-mannosyltransferase MNN2	MNN2	Q59WF4	0.0662544	2580970	385673	1498130	235790	0.14943	0.580452	0.611373	3	3	-0.0446209	-0.780721	0.780721
tr|Q59LL5|Q59LL5_CANAL	Imidazoleglycerol-phosphate dehydratase	HIS3	Q59LL5	0.0664315	46259.7	305127	24393.9	177341	6.59595	0.527326	0.581205	3	3	0.0153332	0.781116	0.781116
sp|Q5ANP2|NACA_CANAL	Nascent polypeptide-associated complex subunit alpha	EGD2	Q5ANP2	0.0672854	0	120696	0	83863.7			0.694832	3	3	0.0104637	0.779928	0.779928
sp|Q9Y7F0|TSA1_CANAL	Peroxiredoxin TSA1-A	TSA1	Q9Y7F0	0.0695739	11115400	58013300	11141100	31061500	5.21919	1.00231	0.53542	3	3	0.205646	0.775673	0.775673
tr|A0A1D8PK30|A0A1D8PK30_CANAL	Ribosomal 60S subunit protein L35A	RPL35	A0A1D8PK30	0.07044	2963430	5727970	517398	1884630	1.93288	0.174594	0.329022	3	3	0.0499371	0.775072	0.775072
tr|Q5A1Z4|Q5A1Z4_CANAL	Aqy1p	AQY1	Q5A1Z4	0.0704799	158477	260893	55650.8	46339.5	1.64626	0.351161	0.177618	3	3	0.00961884	0.775619	0.775619
tr|A0A1D8PI15|A0A1D8PI15_CANAL	Ribosomal 40S subunit protein S10A	RPS10	A0A1D8PI15	0.0707312	1241510	2549770	417454	826910	2.05377	0.336248	0.324308	3	3	0.0343373	0.774485	0.774485
tr|A0A1D8PLC6|A0A1D8PLC6_CANAL	Sugar phosphate phosphatase	HRT2	A0A1D8PLC6	0.0713614	40719.7	125531	35421.3	48741.5	3.0828	0.869881	0.388284	3	3	0.00873201	0.773015	0.773015
sp|O74261|HSP60_CANAL	Heat shock protein 60, mitochondrial	HSP60	O74261	0.0764161	128116	809783	56167.9	493977	6.32069	0.438413	0.610012	3	3	0.0246261	0.764859	0.764859
tr|A0A1D8PPQ1|A0A1D8PPQ1_CANAL	Tif3p	TIF3	A0A1D8PPQ1	0.0787574	56272.7	363700	6924.42	226753	6.46317	0.123051	0.623463	3	3	0.0165001	0.761242	0.761242
tr|Q5AND4|Q5AND4_CANAL	Rdi1p	RDI1	Q5AND4	0.0801965	100290	436020	87134.1	233794	4.34759	0.868822	0.536201	3	3	0.0172141	0.758839	0.758839
tr|A0A1D8PQK5|A0A1D8PQK5_CANAL	3-isopropylmalate dehydrogenase	LEU2	A0A1D8PQK5	0.0806271	397490	648123	168701	79873.1	1.63054	0.424416	0.123237	3	3	0.0148954	0.759623	0.759623
tr|A0A1D8PQA6|A0A1D8PQA6_CANAL	AMP-activated serine/threonine-protein kinase regulatory subunit	SNF4	A0A1D8PQA6	0.0807545	61285.7	100448	14349.7	25412.1	1.63902	0.234144	0.252987	3	3	0.00587401	0.757717	0.757717
tr|Q5A109|Q5A109_CANAL	Ubiquitin-ribosomal 40S subunit protein S31 fusion protein	UBI3	Q5A109	0.0811407	35598400	1145530	25721700	139565	0.0321794	0.722553	0.121834	3	3	-0.174364	-0.758019	0.758019
tr|Q59W33|Q59W33_CANAL	Glycerol-3-phosphate dehydrogenase [NAD(+)]	GPD2	Q59W33	0.0812933	330650	908177	152894	403497	2.74664	0.462404	0.444293	3	3	0.0225518	0.757114	0.757114
tr|A0A1D8PFF9|A0A1D8PFF9_CANAL	E2 ubiquitin-conjugating protein	orf19.6358	A0A1D8PFF9	0.081442	8579.1	1790.9	5041.57	584.809	0.208751	0.587658	0.326545	3	3	-0.00244269	-0.756296	0.756296
tr|A0A1D8PHR9|A0A1D8PHR9_CANAL	Rab family GTPase	YPT72	A0A1D8PHR9	0.082035	760130	363597	265256	134323	0.478335	0.348961	0.369428	3	3	-0.0186746	-0.756044	0.756044
sp|Q59LU0|DBP2_CANAL	ATP-dependent RNA helicase DBP2	DBP2	Q59LU0	0.0824888	221929	488893	106990	169698	2.20292	0.482092	0.347106	3	3	0.0153335	0.756217	0.756217
sp|P83777|IPYR_CANAL	Inorganic pyrophosphatase	IPP1	P83777	0.0839791	414083	3979370	130737	2695000	9.61006	0.315725	0.677244	3	3	0.0558838	0.753022	0.753022
tr|A0A1D8PHU4|A0A1D8PHU4_CANAL	Uncharacterized protein	orf19.2257	A0A1D8PHU4	0.0845592	48808	123627	48141	30101.9	2.53293	0.986334	0.243489	3	3	0.00808478	0.751576	0.751576
tr|Q59N42|Q59N42_CANAL	Serine/threonine-protein phosphatase	GLC7	Q59N42	0.0875101	236107	280650	13338.3	31565.8	1.18866	0.0564927	0.112474	3	3	0.00622649	0.747932	0.747932
sp|P0C8K9|COX1_CANAL	Cytochrome c oxidase subunit 1	COX1	P0C8K9	0.0876794	123999	912737	78612.6	602156	7.36086	0.63398	0.659726	3	3	0.0261883	0.747439	0.747439
sp|P83779|PDC1_CANAL	Pyruvate decarboxylase	PDC11	P83779	0.0881843	16384300	6707670	7386380	1097490	0.409395	0.45082	0.163617	3	3	-0.0916804	-0.746669	0.746669
tr|Q5A678|Q5A678_CANAL	Ssz1p	SSZ1	Q5A678	0.0882284	80161.3	234713	96875.6	69610.3	2.92801	1.20851	0.296576	3	3	0.0115876	0.746711	0.746711
tr|A0A1D8PFX8|A0A1D8PFX8_CANAL	Rab GDP dissociation inhibitor	GDI1	A0A1D8PFX8	0.090698	31101.3	82235.3	32046.5	23787.5	2.64411	1.03039	0.289261	3	3	0.00665391	0.7436	0.7436
tr|A0A1D8PCL4|A0A1D8PCL4_CANAL	Uncharacterized protein	orf19.4532	A0A1D8PCL4	0.091588	114891	4795670	47606.1	3667550	41.7411	0.41436	0.764763	3	3	0.0635404	0.741519	0.741519
tr|A0A1D8PS38|A0A1D8PS38_CANAL	H(+)-transporting V1 sector ATPase subunit E	VMA4	A0A1D8PS38	0.0946696	173760	340517	79342.1	106054	1.9597	0.456619	0.311449	3	3	0.0119717	0.737927	0.737927
sp|Q9P940|TPIS_CANAL	Triosephosphate isomerase	TPI1	Q9P940	0.0967237	8625500	14420700	2797210	3706720	1.67186	0.324296	0.257042	3	3	0.070386	0.734468	0.734468
tr|A0A1D8PH78|A0A1D8PH78_CANAL	Bifunctional (2E,6E)-farnesyl diphosphate synthase/dimethylallyltranstransferase	ERG20	A0A1D8PH78	0.0989178	178653	1026330	44389.1	684158	5.74483	0.248465	0.666604	3	3	0.0268516	0.731036	0.731036
sp|P83782|QCR2_CANAL	Cytochrome b-c1 complex subunit 2, mitochondrial	QCR2	P83782	0.0993515	62851	259251	27002.5	156829	4.12486	0.429627	0.604929	3	3	0.0129156	0.7302	0.7302
tr|Q5A2A5|Q5A2A5_CANAL	Diadenosine tetraphosphate synthetase	GRS1	Q5A2A5	0.0996663	1270150	2246030	684742	397516	1.76832	0.539102	0.176986	3	3	0.0288044	0.730343	0.730343
tr|Q59P43|Q59P43_CANAL	GTP-binding nuclear protein	GSP1	Q59P43	0.101768	1151000	2949470	142036	1465070	2.56253	0.123402	0.496725	3	3	0.0389888	0.726717	0.726717
tr|Q5AND9|Q5AND9_CANAL	Arf family GTPase	ARF2	Q5AND9	0.102619	7089130	4108770	1496340	1937200	0.579587	0.211075	0.471479	3	3	-0.0501921	-0.726136	0.726136
tr|Q5AH07|Q5AH07_CANAL	Nuc2p	NUC2	Q5AH07	0.103716	199517	31687.7	137796	13530.3	0.158822	0.690648	0.426991	3	3	-0.0118793	-0.723457	0.723457
sp|Q59VP1|H2B2_CANAL	Histone H2B.2	HTB2	Q59VP1	0.105829	8951030	1909100	5859130	54490.1	0.213283	0.654576	0.0285423	3	3	-0.0768184	-0.720758	0.720758
tr|A0A1D8PM41|A0A1D8PM41_CANAL	Ribosomal 60S subunit protein L22B	orf19.1409.1	A0A1D8PM41	0.106185	84981	387340	32482.4	249841	4.55796	0.382231	0.645016	3	3	0.0159188	0.72056	0.72056
tr|A0A1D8PTS0|A0A1D8PTS0_CANAL	Ribosomal protein P2A	RPP2A	A0A1D8PTS0	0.108052	140519	1325570	136227	985444	9.43336	0.969455	0.743413	3	3	0.0314526	0.717845	0.717845
tr|A0A1D8PSV5|A0A1D8PSV5_CANAL	Ribosomal 40S subunit protein S3	RPS3	A0A1D8PSV5	0.108758	7967330	9123330	643485	730017	1.14509	0.0807654	0.0800165	3	3	0.0310775	0.717656	0.717656
tr|A0A1D8PGY0|A0A1D8PGY0_CANAL	Ribosomal 60S subunit protein L21A	RPL21A	A0A1D8PGY0	0.108779	35546.7	962.477	29091.9	1182.08	0.0270764	0.818413	1.22817	3	3	-0.00538004	-0.718269	0.718269
tr|A0A1D8PRR9|A0A1D8PRR9_CANAL	Exportin	CRM1	A0A1D8PRR9	0.109521	21590.6	211727	13595.7	159964	9.80647	0.629705	0.755517	3	3	0.012585	0.716066	0.716066
sp|P83780|G6PI_CANAL	Glucose-6-phosphate isomerase	PGI1	P83780	0.110178	217712	1221130	182113	829657	5.60892	0.836484	0.679417	3	3	0.0288941	0.7152	0.7152
tr|Q5A397|Q5A397_CANAL	Hsp70 family ATPase	SSB1	Q5A397	0.112976	7377470	15349700	3510080	5849840	2.08061	0.475784	0.381106	3	3	0.0812147	0.711294	0.711294
sp|P87220|VATD_CANAL	V-type proton ATPase subunit D	VMA8	P87220	0.116218	5116.63	1594.01	2847.2	1098.77	0.311534	0.556459	0.689316	3	3	-0.0016991	-0.705763	0.705763
sp|Q59Q46|IMDH_CANAL	Inosine-5'-monophosphate dehydrogenase	IMH3	Q59Q46	0.116686	208033	327753	53130	89292.2	1.57548	0.255392	0.272437	3	3	0.00990564	0.705472	0.705472
sp|Q5A4Q1|KAD2_CANAL	Adenylate kinase	ADK1	Q5A4Q1	0.116996	600953	1696990	375281	875277	2.82382	0.624476	0.515783	3	3	0.0300158	0.706305	0.706305
tr|A0A1D8PSC5|A0A1D8PSC5_CANAL	Ribosomal 60S subunit protein L28	RPL28	A0A1D8PSC5	0.119301	207330	929557	33292.1	632080	4.48346	0.160575	0.67998	3	3	0.0243045	0.703014	0.703014
sp|P42800|INO1_CANAL	Inositol-3-phosphate synthase	INO1	P42800	0.119705	1258260	8599800	730468	6402190	6.83468	0.580538	0.744458	3	3	0.077432	0.702225	0.702225
tr|A0A1D8PRL8|A0A1D8PRL8_CANAL	Aminotran_1_2 domain-containing protein	CAALFM_CR00130CA	A0A1D8PRL8	0.119826	0	36577.3	0	32118.5			0.8781	3	3	0.00546489	0.702063	0.702063
sp|P83778|MDHC_CANAL	Malate dehydrogenase, cytoplasmic	MDH1	P83778	0.124814	204048000	3176510	179588000	3528610	0.0155675	0.880126	1.11084	3	3	-0.403146	-0.695638	0.695638
sp|P46614|KPYK_CANAL	Pyruvate kinase	CDC19	P46614	0.124854	2869270	858860	1703140	576289	0.299331	0.59358	0.670993	3	3	-0.0402765	-0.694662	0.694662
tr|Q5A9E7|Q5A9E7_CANAL	Uncharacterized protein	CAALFM_CR01350CA	Q5A9E7	0.125987	58829	124200	54611.4	21530.1	2.1112	0.928308	0.17335	3	3	0.00728281	0.695848	0.695848
sp|Q59NN8|FES1_CANAL	Hsp70 nucleotide exchange factor FES1	FES1	Q59NN8	0.12687	14626.7	1030100	25334.1	914406	70.4259	1.73205	0.887689	3	3	0.0286122	0.693058	0.693058
tr|A0A1D8PCG7|A0A1D8PCG7_CANAL	40S ribosomal protein S21	RPS21B	A0A1D8PCG7	0.127821	189443	2514130	141906	2096420	13.2712	0.749069	0.833855	3	3	0.0432488	0.691771	0.691771
sp|Q59NP1|CTR1_CANAL	Copper transport protein CTR1	CTR1	Q59NP1	0.127886	0	403010	0	364353			0.904079	3	3	0.0180054	0.691656	0.691656
tr|A0A1D8PDZ1|A0A1D8PDZ1_CANAL	Ribosomal 60S subunit protein L34B	orf19.6220.4	A0A1D8PDZ1	0.127888	23950.3	0	21653.1	0	0	0.904085		3	3	-0.00438092	-0.690324	0.690324
tr|A0A1D8PP21|A0A1D8PP21_CANAL	Methionyl-tRNA synthetase	MES1	A0A1D8PP21	0.129018	368583	50243.3	275543	87024	0.136315	0.747572	1.73205	3	3	-0.0160095	-0.69123	0.69123
sp|O74198|ERG6_CANAL	Sterol 24-C-methyltransferase	ERG6	O74198	0.12911	111736	283077	58719	144070	2.53343	0.525514	0.508942	3	3	0.0117167	0.689492	0.689492
tr|A0A1D8PUB9|A0A1D8PUB9_CANAL	Oligo-1,6-glucosidase IMA1	MAL2	A0A1D8PUB9	0.129505	67060	911671	61776.3	765483	13.5949	0.921209	0.839647	3	3	0.0260262	0.689571	0.689571
tr|Q5A0V9|Q5A0V9_CANAL	Histone-glutamine methyltransferase	NOP1	Q5A0V9	0.1306	236484	655560	327903	196971	2.77211	1.38657	0.300463	3	3	0.0183193	0.688366	0.688366
tr|A0A1D8PK40|A0A1D8PK40_CANAL	Ribosomal protein L19	RPL19A	A0A1D8PK40	0.132763	1237830	3694770	1462140	1722680	2.98487	1.18121	0.466248	3	3	0.0442728	0.685701	0.685701
tr|Q5A2A7|Q5A2A7_CANAL	Metalloendopeptidase	PRD1	Q5A2A7	0.136697	175282	71591	92229.6	28912.3	0.408434	0.526179	0.403854	3	3	-0.0090704	-0.681378	0.681378
sp|Q59S06|NOP58_CANAL	Nucleolar protein 58	NOP58	Q59S06	0.137097	1651070	94060	1450810	85753.7	0.0569692	0.878708	0.911692	3	3	-0.0351583	-0.681328	0.681328
tr|A0A1D8PHU6|A0A1D8PHU6_CANAL	Putative phosphoric monoester hydrolase	orf19.2269	A0A1D8PHU6	0.137536	237025	71714.7	145737	51393.2	0.302562	0.614859	0.716635	3	3	-0.0114049	-0.678015	0.678015
sp|Q00310|MNT1_CANAL	Glycolipid 2-alpha-mannosyltransferase 1	MNT1	Q00310	0.141387	9108470	1198420	7332930	1529060	0.131572	0.805067	1.27589	3	3	-0.0789385	-0.676048	0.676048
tr|A0A1D8PC97|A0A1D8PC97_CANAL	Tubulin beta chain	TUB2	A0A1D8PC97	0.142412	964523	1410600	193723	377008	1.46248	0.200849	0.267268	3	3	0.0186906	0.673433	0.673433
tr|A0A1D8PEY9|A0A1D8PEY9_CANAL	Ribosomal 40S subunit protein S17B	RPS17B	A0A1D8PEY9	0.142964	801700	3280630	1041220	2117690	4.0921	1.29877	0.645514	3	3	0.0440397	0.672774	0.672774
tr|A0A1D8PP00|A0A1D8PP00_CANAL	Arginase	CAR1	A0A1D8PP00	0.143113	46620	552607	22323.7	481394	11.8534	0.478844	0.871132	3	3	0.0198969	0.672691	0.672691
tr|A0A1D8PS03|A0A1D8PS03_CANAL	Anthranilate synthase	TRP2	A0A1D8PS03	0.143196	93569.7	52071.7	37355.7	12942.7	0.556502	0.399229	0.248556	3	3	-0.00568648	-0.671269	0.671269
tr|Q59WW7|Q59WW7_CANAL	Glutathione peroxidase	orf19.86	Q59WW7	0.145165	501280	1236510	433404	556038	2.46671	0.864594	0.449683	3	3	0.0239655	0.670917	0.670917
tr|A0A1D8PU69|A0A1D8PU69_CANAL	Thioredoxin	TRX1	A0A1D8PU69	0.145735	221804	2557150	290352	2224630	11.5289	1.30905	0.869963	3	3	0.0426461	0.669536	0.669536
tr|A0A1D8PEA9|A0A1D8PEA9_CANAL	TOG domain-containing protein	orf19.5085	A0A1D8PEA9	0.146644	115445	260620	126219	60293.1	2.25753	1.09333	0.231345	3	3	0.0106482	0.669955	0.669955
tr|Q59VG1|Q59VG1_CANAL	Homocitrate synthase	LYS21	Q59VG1	0.149062	1033140	28337.1	975214	33099.6	0.0274282	0.943933	1.16806	3	3	-0.0279203	-0.666268	0.666268
tr|A0A1D8PHH4|A0A1D8PHH4_CANAL	Ribosomal 60S subunit protein L33A	orf19.6882.1	A0A1D8PHH4	0.149775	92653.3	605437	96340.6	489730	6.53443	1.0398	0.808888	3	3	0.0199256	0.665172	0.665172
sp|P83783|SAHH_CANAL	Adenosylhomocysteinase	SAH1	P83783	0.151333	3259570	4626530	673673	1155110	1.41937	0.206676	0.24967	3	3	0.0324309	0.66216	0.66216
tr|Q5AED0|Q5AED0_CANAL	Glyco_hydro_63 domain-containing protein	orf19.338	Q5AED0	0.151417	202890	25119	172578	21778.7	0.123806	0.850599	0.867021	3	3	-0.0117241	-0.663741	0.663741
tr|A0A1D8PPS1|A0A1D8PPS1_CANAL	Ribosomal 60S subunit protein L25	RPL25	A0A1D8PPS1	0.154535	1565460	2982570	1077400	894686	1.90524	0.688231	0.299972	3	3	0.0329706	0.65927	0.65927
tr|Q5AF81|Q5AF81_CANAL	Monothiol glutaredoxin	GRX3	Q5AF81	0.155893	17062.4	1553.94	15309.7	1588.45	0.0910741	0.897275	1.0222	3	3	-0.00344139	-0.656992	0.656992
tr|A0A1D8PC56|A0A1D8PC56_CANAL	Uncharacterized protein	orf19.6082	A0A1D8PC56	0.15627	13143.3	1286.8	11568.6	2228.8	0.0979051	0.880189	1.73205	3	3	-0.00301561	-0.658204	0.658204
tr|A0A1D8PQL1|A0A1D8PQL1_CANAL	N-terminal protein methyltransferase	orf19.7069	A0A1D8PQL1	0.159096	33046.3	1349.8	31688.8	2337.92	0.0408457	0.958921	1.73205	3	3	-0.00491536	-0.654515	0.654515
tr|Q5AEN2|Q5AEN2_CANAL	Ribosomal 60S subunit protein L9B	RPL9B	Q5AEN2	0.160347	3124700	3975630	778401	356983	1.27232	0.249112	0.0897927	3	3	0.0254526	0.653389	0.653389
tr|A0A1D8PQQ3|A0A1D8PQQ3_CANAL	Alpha-1,4 glucan phosphorylase	GPH1	A0A1D8PQQ3	0.160589	78528.3	9948.63	68951.7	4014.38	0.126688	0.878049	0.40351	3	3	-0.00723192	-0.653806	0.653806
tr|A0A1D8PE36|A0A1D8PE36_CANAL	Lhp1p	LHP1	A0A1D8PE36	0.16372	0	182070	0	185143			1.01688	3	3	0.0117194	0.648441	0.648441
tr|A0A1D8PN05|A0A1D8PN05_CANAL	Nrd1 complex RNA-binding subunit	orf19.581	A0A1D8PN05	0.163829	53877	315833	28018.2	264988	5.86211	0.52004	0.839015	3	3	0.0140489	0.647997	0.647997
sp|P22011|PPIA_CANAL	Peptidyl-prolyl cis-trans isomerase	CYP1	P22011	0.164974	379446	2337590	296537	1976710	6.16052	0.781498	0.845619	3	3	0.0384124	0.64737	0.64737
tr|A0A1D8PEM5|A0A1D8PEM5_CANAL	Isocitrate dehydrogenase [NAD] subunit, mitochondrial	IDH1	A0A1D8PEM5	0.166536	172877	90734.7	83095.9	13889.7	0.52485	0.480664	0.153081	3	3	-0.00787193	-0.646843	0.646843
tr|A0A1D8PIB2|A0A1D8PIB2_CANAL	Asparagine synthase (Glutamine-hydrolyzing) 2	ASN1	A0A1D8PIB2	0.167647	2123770	6012200	1289930	3787940	2.83091	0.60738	0.630043	3	3	0.0539543	0.643746	0.643746
tr|Q59RL1|Q59RL1_CANAL	Amino acid transporter	GNP1	Q59RL1	0.16932	99195.3	6926.3	95316.1	4727.66	0.0698249	0.960893	0.682566	3	3	-0.00832425	-0.643799	0.643799
tr|Q59SI4|Q59SI4_CANAL	Nmd5p	NMD5	Q59SI4	0.169757	20190.7	226767	19674.6	213034	11.2313	0.97444	0.939442	3	3	0.0124173	0.641581	0.641581
tr|A0A1D8PNP9|A0A1D8PNP9_CANAL	Sm-like protein	orf19.2639.1	A0A1D8PNP9	0.170249	45425.7	283500	19413.7	246162	6.24096	0.427373	0.868296	3	3	0.013318	0.640708	0.640708
sp|Q9P8W0|LIP5_CANAL	Lipase 5	LIP5	Q9P8W0	0.170562	18589400	566840	18684600	977102	0.0304927	1.00512	1.72377	3	3	-0.115753	-0.639855	0.639855
tr|A0A1D8PM35|A0A1D8PM35_CANAL	Translation elongation factor 1 subunit beta	EFB1	A0A1D8PM35	0.17445	1028180	4634770	627273	3735450	4.50775	0.610082	0.805963	3	3	0.0516802	0.636421	0.636421
tr|A0A1D8PGF8|A0A1D8PGF8_CANAL	Msb2p	MSB2	A0A1D8PGF8	0.174843	575266	9139440	588586	8985560	15.8873	1.02315	0.983164	3	3	0.079572	0.635676	0.635676
sp|G1UB37|FLU1_CANAL	Major facilitator superfamily multidrug transporter FLU1	FLU1	G1UB37	0.175722	17709.1	1961.92	16550	1292.18	0.110786	0.934549	0.658628	3	3	-0.00340929	-0.634667	0.634667
sp|Q59XX2|MP65_CANAL	Cell surface mannoprotein MP65	MP65	Q59XX2	0.180004	598673	19286	618369	11952.2	0.0322145	1.0329	0.619735	3	3	-0.0205788	-0.629194	0.629194
sp|Q5AHZ7|MED17_CANAL	Mediator of RNA polymerase II transcription subunit 17	SRB4	Q5AHZ7	0.180808	138426	28350.1	109601	43121	0.204803	0.791769	1.52102	3	3	-0.00899998	-0.630868	0.630868
tr|A0A1D8PJ01|A0A1D8PJ01_CANAL	Plasma membrane ATPase	PMA1	A0A1D8PJ01	0.182146	3832900	7342170	908816	3658230	1.91556	0.237109	0.498249	3	3	0.0506025	0.627476	0.627476
tr|Q5AD39|Q5AD39_CANAL	Peptide-methionine (S)-S-oxide reductase	MXR1	Q5AD39	0.185739	42236.3	269040	37432.5	243286	6.36987	0.886264	0.904276	3	3	0.0128281	0.623742	0.623742
sp|Q5A0M4|EF2_CANAL	Elongation factor 2	EFT2	Q5A0M4	0.185825	25879000	15261000	11149100	2925500	0.589706	0.430816	0.191698	3	3	-0.08774	-0.623463	0.623463
tr|A0A1D8PDT3|A0A1D8PDT3_CANAL	Ribosomal 40S subunit protein S14B	RPS14B	A0A1D8PDT3	0.190858	51434.7	299720	48568.2	269066	5.82719	0.944268	0.897725	3	3	0.0133566	0.61794	0.61794
tr|A0A1D8PMQ4|A0A1D8PMQ4_CANAL	Proteasome regulatory particle base subunit	RPT5	A0A1D8PMQ4	0.193254	349593	223507	133851	40308.4	0.639333	0.382875	0.180346	3	3	-0.00949867	-0.615383	0.615383
tr|Q59T44|Q59T44_CANAL	40S ribosomal protein S8	RPS8A	Q59T44	0.193407	3527630	4830470	1278230	673971	1.36932	0.362349	0.139525	3	3	0.0305263	0.615161	0.615161
RRRRRtr|A0A1D8PTP9|A0A1D8PTP9_CANAL	REVERSED Chaperone ATPase	HSP104	A0A1D8PTP9	0.193555	24171	1954.4	24418.1	3385.12	0.0808572	1.01022	1.73205	3	3	-0.00399163	-0.615906	0.615906
sp|P43076|PHR1_CANAL	pH-responsive protein 1	PHR1	P43076	0.193599	933023	1376870	392185	297990	1.4757	0.420338	0.216426	3	3	0.0177942	0.614256	0.614256
tr|A0A1D8PNG9|A0A1D8PNG9_CANAL	Threonine synthase	THR4	A0A1D8PNG9	0.19474	212153	472617	270629	104135	2.22771	1.27563	0.220337	3	3	0.0136417	0.614117	0.614117
tr|Q5A934|Q5A934_CANAL	Zinc finger-containing protein	ZPR1	Q5A934	0.197528	45484.7	5360.17	44764.8	4778.04	0.117846	0.984173	0.891397	3	3	-0.00535051	-0.612196	0.612196
tr|A0A1D8PCT0|A0A1D8PCT0_CANAL	1,3-beta-D-glucan-UDP glucosyltransferase	GSC1	A0A1D8PCT0	0.197739	230487	1497230	211585	1406270	6.49595	0.91799	0.939246	3	3	0.0300008	0.610814	0.610814
tr|Q59TS4|Q59TS4_CANAL	Chorismate mutase	ARO7	Q59TS4	0.197843	58863.3	99829.3	23755.7	39395.1	1.69595	0.403573	0.394625	3	3	0.00539441	0.610679	0.610679
tr|Q5A4M2|Q5A4M2_CANAL	Malate dehydrogenase (Oxaloacetate-decarboxylating)	MAE1	Q5A4M2	0.19797	13863.3	78786.7	24012	68866.2	5.6831	1.73205	0.874084	3	3	0.00679026	0.610547	0.610547
tr|Q5A750|Q5A750_CANAL	Transketolase	TKL1	Q5A750	0.19842	9438530	22034900	1165990	14119900	2.33457	0.123535	0.640796	3	3	0.094565	0.610197	0.610197
sp|Q5AMT2|BGL2_CANAL	Glucan 1,3-beta-glucosidase BGL2	BGL2	Q5AMT2	0.19893	6466770	17107100	3386180	11496500	2.64539	0.523628	0.672028	3	3	0.0869141	0.609934	0.609934
tr|A0A1D8PIF8|A0A1D8PIF8_CANAL	Leu42p	LEU42	A0A1D8PIF8	0.199866	447973	576280	118960	82719.1	1.28642	0.265553	0.14354	3	3	0.00955603	0.610196	0.610196
sp|Q59L13|IF6_CANAL	Eukaryotic translation initiation factor 6	TIF6	Q59L13	0.201584	238147	1469820	269567	1371260	6.17193	1.13194	0.932941	3	3	0.0294825	0.606713	0.606713
tr|A0A1D8PRZ8|A0A1D8PRZ8_CANAL	Type 2C protein phosphatase	PTC2	A0A1D8PRZ8	0.20214	7101	243577	12299.3	268443	34.3017	1.73205	1.10209	3	3	0.0129161	0.606311	0.606311
tr|A0A1D8PLI2|A0A1D8PLI2_CANAL	Isopentenyl-diphosphate Delta-isomerase	IDI1	A0A1D8PLI2	0.20217	62410.3	238802	28882.7	198372	3.82633	0.462786	0.830694	3	3	0.011153	0.606177	0.606177
tr|Q5A7M9|Q5A7M9_CANAL	Glycerol-1-phosphatase	RHR2	Q5A7M9	0.203164	248344	436763	201635	73803.1	1.75871	0.811921	0.168977	3	3	0.0115124	0.604888	0.604888
tr|A0A1D8PR11|A0A1D8PR11_CANAL	Peptidase_M24 domain-containing protein	orf19.6507	A0A1D8PR11	0.205718	25641	1471.77	27724.7	777.632	0.0573989	1.08126	0.528367	3	3	-0.0041106	-0.601701	0.601701
tr|A0A1D8PNW1|A0A1D8PNW1_CANAL	Putative glucan endo-1\3-beta-D-glucosidase	SCW11	A0A1D8PNW1	0.208323	6858.6	53115	6518.85	53060.1	7.74429	0.950464	0.998966	3	3	0.00568023	0.599661	0.599661
tr|A0A1D8PKB4|A0A1D8PKB4_CANAL	Serine/threonine protein kinase	YCK2	A0A1D8PKB4	0.211346	264663	799443	267339	562858	3.0206	1.01011	0.704062	3	3	0.0192656	0.596596	0.596596
tr|A0A1D8PKJ4|A0A1D8PKJ4_CANAL	Saccharopine dehydrogenase (NADP+, L-glutamate-forming)	LYS9	A0A1D8PKJ4	0.213301	2856070	463107	2799510	138740	0.162148	0.980199	0.299585	3	3	-0.0406487	-0.594057	0.594057
tr|Q5AB87|Q5AB87_CANAL	Ribosomal 60S subunit protein L16A	RPL16A	Q5AB87	0.215483	19515000	11127600	2924600	9439270	0.570207	0.149864	0.848276	3	3	-0.0760394	-0.592452	0.592452
tr|Q59T95|Q59T95_CANAL	Cystathionine beta-synthase	CYS4	Q59T95	0.220545	392683	1087790	588403	585467	2.77014	1.49842	0.538219	3	3	0.0217897	0.587151	0.587151
tr|Q5A3P4|Q5A3P4_CANAL	Tryptophanyl-tRNA synthetase	WRS1	Q5A3P4	0.2209	6261.57	1274.03	5857.1	1110.44	0.203469	0.935405	0.871596	3	3	-0.00184827	-0.587776	0.587776
tr|A0A1D8PI71|A0A1D8PI71_CANAL	FPP:FPP farnesyltransferase	ERG9	A0A1D8PI71	0.224302	12576.3	60556	21782.8	53608.2	4.81508	1.73205	0.885266	3	3	0.0057062	0.583348	0.583348
sp|Q5AML1|EIF3C_CANAL	Eukaryotic translation initiation factor 3 subunit C	NIP1	Q5AML1	0.224632	142706	241873	96423.3	70930.7	1.69491	0.67568	0.293255	3	3	0.00820475	0.583265	0.583265
sp|O59931|RL13_CANAL	60S ribosomal protein L13	RPL13	O59931	0.229209	3076670	1575500	1098580	1468340	0.51208	0.357069	0.931981	3	3	-0.0317329	-0.577509	0.577509
sp|Q5A4E2|DED1_CANAL	ATP-dependent RNA helicase DED1	DED1	Q5A4E2	0.229467	24014.3	2482.43	25967.3	4299.7	0.103373	1.08133	1.73205	3	3	-0.00379252	-0.576173	0.576173
sp|Q59Z14|DOHH_CANAL	Deoxyhypusine hydroxylase	LIA1	Q59Z14	0.230434	80153.3	311799	54060	278685	3.89003	0.674458	0.893797	3	3	0.012476	0.577385	0.577385
tr|Q59ST2|Q59ST2_CANAL	Ptr22p	PTR22	Q59ST2	0.231533	51536.3	1048630	72556.6	1223270	20.3475	1.40787	1.16654	3	3	0.0258571	0.576237	0.576237
sp|O94083|IF5A_CANAL	Eukaryotic translation initiation factor 5A	ANB1	O94083	0.231725	33857	16712.7	14487.6	15313.6	0.493625	0.427906	0.916284	3	3	-0.00339158	-0.576314	0.576314
tr|A0A1D8PS12|A0A1D8PS12_CANAL	Leucyl-tRNA synthetase	CDC60	A0A1D8PS12	0.234642	1197370	2337070	239993	1391440	1.95184	0.200434	0.595378	3	3	0.0275601	0.572936	0.572936
sp|O42825|RHO1_CANAL	GTP-binding protein RHO1	RHO1	O42825	0.234779	2323930	4074900	1495390	1572560	1.75345	0.643472	0.385914	3	3	0.0341462	0.572627	0.572627
tr|A0A1D8PE97|A0A1D8PE97_CANAL	Glycine cleavage system P protein	GCV2	A0A1D8PE97	0.237311	137463	292600	27863.6	191508	2.12857	0.202698	0.654504	3	3	0.010146	0.570367	0.570367
tr|A0A1D8PUB4|A0A1D8PUB4_CANAL	L-iditol 2-dehydrogenase	XYL2	A0A1D8PUB4	0.241028	710363	41977.7	840951	36591.6	0.0590932	1.18383	0.871692	3	3	-0.0209191	-0.564738	0.564738
tr|Q5ALV5|Q5ALV5_CANAL	Cytochrome c oxidase subunit IV	COX4	Q5ALV5	0.243191	28410.7	1142.5	34473.9	1978.87	0.0402137	1.21341	1.73205	3	3	-0.0042306	-0.564387	0.564387
tr|Q5ALM6|Q5ALM6_CANAL	Peptidyl-prolyl cis-trans isomerase	CPR3	Q5ALM6	0.245186	31046	173387	44846.4	175528	5.58483	1.44451	1.01235	3	3	0.00964859	0.562409	0.562409
tr|A0A1D8PHE5|A0A1D8PHE5_CANAL	Cytochrome b5 heme-binding domain-containing protein	orf19.6867	A0A1D8PHE5	0.248262	209633	479293	77233.5	337164	2.28634	0.368422	0.70346	3	3	0.0132592	0.56002	0.56002
tr|A0A1D8PNQ6|A0A1D8PNQ6_CANAL	40S ribosomal protein S25	RPS25B	A0A1D8PNQ6	0.252592	61344.3	220107	18882.8	205011	3.58805	0.307817	0.931416	3	3	0.0101247	0.555227	0.555227
sp|P46273|PGK_CANAL	Phosphoglycerate kinase	PGK1	P46273	0.252995	83846300	43881700	50776700	10630100	0.523358	0.605592	0.242244	3	3	-0.16082	-0.555664	0.555664
sp|Q9UWF6|PLB1_CANAL	Lysophospholipase 1	PLB1	Q9UWF6	0.253344	173234	3668730	107145	4540160	21.1779	0.618499	1.23753	3	3	0.0474949	0.554717	0.554717
tr|A0A1D8PTY0|A0A1D8PTY0_CANAL	Uncharacterized protein	CAALFM_CR09240CA	A0A1D8PTY0	0.267383	28343.3	517924	3588.32	658646	18.2732	0.126602	1.2717	3	3	0.0175603	0.541374	0.541374
tr|Q59VX7|Q59VX7_CANAL	Karyopherin beta	orf19.3681	Q59VX7	0.269031	95232.3	19329.2	99018.1	26608.8	0.202969	1.03975	1.37661	3	3	-0.00689476	-0.539069	0.539069
tr|Q59Y64|Q59Y64_CANAL	RNA methylation protein	orf19.3585	Q59Y64	0.270791	117191	6704	149659	8400.6	0.0572058	1.27705	1.25307	3	3	-0.00831251	-0.537855	0.537855
tr|Q59PA1|Q59PA1_CANAL	Fre10p	FRE10	Q59PA1	0.273028	49516	5246.43	60372.1	1443.94	0.105954	1.21924	0.275224	3	3	-0.00524499	-0.535098	0.535098
tr|A0A1D8PSQ3|A0A1D8PSQ3_CANAL	Type I HSP40 co-chaperone	YDJ1	A0A1D8PSQ3	0.273476	30842.3	111893	53420.5	96940.6	3.62791	1.73205	0.866367	3	3	0.00710624	0.53559	0.53559
sp|Q5AEF2|SEC13_CANAL	Protein transport protein SEC13	SEC13	Q5AEF2	0.278844	197457	717677	86960.9	714521	3.6346	0.440405	0.995603	3	3	0.01793	0.530913	0.530913
tr|Q5A4W7|Q5A4W7_CANAL	Fatty acid synthase subunit beta	FAS1	Q5A4W7	0.280974	2161070	1256070	1096970	617213	0.581227	0.507605	0.491385	3	3	-0.0235986	-0.528797	0.528797
tr|Q5A6R1|Q5A6R1_CANAL	Ribosomal protein L15	RPL15A	Q5A6R1	0.295773	573173	747013	79059.9	237769	1.30329	0.137934	0.318293	3	3	0.0101993	0.514728	0.514728
tr|A0A1D8PE67|A0A1D8PE67_CANAL	AIR synthase	ADE5,7	A0A1D8PE67	0.298494	141462	382433	72515.2	341998	2.70343	0.512611	0.894267	3	3	0.0119965	0.512994	0.512994
sp|Q59ST1|MTAP_CANAL	S-methyl-5'-thioadenosine phosphorylase	MEU1	Q59ST1	0.299778	60957.3	1817.6	86034.2	2258.01	0.0298176	1.41138	1.2423	3	3	-0.00592394	-0.510765	0.510765
sp|O13318|PHR2_CANAL	pH-responsive protein 2	PHR2	O13318	0.299864	1698050	17001.3	2446840	10714.9	0.0100123	1.44097	0.630237	3	3	-0.0317402	-0.51326	0.51326
tr|Q59MR4|Q59MR4_CANAL	Coproporphyrinogen oxidase	HEM13	Q59MR4	0.300732	25318.7	7485	25166.9	6576.13	0.295632	0.994006	0.878574	3	3	-0.00326717	-0.51255	0.51255
tr|Q5AF62|Q5AF62_CANAL	Transmembrane 9 superfamily member	EMP70	Q5AF62	0.307951	88460	320537	153217	308415	3.62352	1.73205	0.962183	3	3	0.0116456	0.503217	0.503217
sp|Q5AHB1|PAN1_CANAL	Actin cytoskeleton-regulatory complex protein PAN1	PAN1	Q5AHB1	0.311064	8591.03	2124.27	9462.31	1979.66	0.247266	1.10142	0.931924	3	3	-0.00194765	-0.50278	0.50278
tr|A0A1D8PSE7|A0A1D8PSE7_CANAL	Ifr2p	IFR2	A0A1D8PSE7	0.311556	157710	409987	147896	347398	2.59963	0.937771	0.84734	3	3	0.0121104	0.500311	0.500311
tr|A0A1D8PPA5|A0A1D8PPA5_CANAL	Het1p	HET1	A0A1D8PPA5	0.313133	1095400	2253440	934138	1467580	2.05718	0.85278	0.651264	3	3	0.0259146	0.498994	0.498994
tr|Q59WG3|Q59WG3_CANAL	AAA family ATPase	CDC48	Q59WG3	0.316107	5160870	3966670	1779270	313412	0.768605	0.344762	0.0790114	3	3	-0.0262384	-0.496206	0.496206
sp|P46598|HSP90_CANAL	Heat shock protein 90 homolog	HSP90	P46598	0.316239	7483270	10945300	5199440	644818	1.46264	0.694809	0.0589126	3	3	0.0447992	0.497524	0.497524
tr|A0A1D8PHR0|A0A1D8PHR0_CANAL	Valyl-tRNA synthetase	VAS1	A0A1D8PHR0	0.321499	457087	210646	130145	354474	0.460846	0.284727	1.68279	3	3	-0.0118589	-0.491315	0.491315
sp|Q5AJB1|VATA_CANAL	V-type proton ATPase catalytic subunit A	TFP1	Q5AJB1	0.322927	524600	732027	318625	13331.9	1.3954	0.607367	0.0182124	3	3	0.0108933	0.491299	0.491299
tr|A0A1D8PRY3|A0A1D8PRY3_CANAL	ATP synthase subunit gamma	ATP3	A0A1D8PRY3	0.324777	11547.3	1789.14	14986.6	1563.84	0.154941	1.29784	0.87407	3	3	-0.00235675	-0.489248	0.489248
sp|Q5ACZ2|DFG5_CANAL	Mannan endo-1,6-alpha-mannosidase DFG5	DFG5	Q5ACZ2	0.327781	52811.7	79203.3	22909.7	34052.3	1.49973	0.433801	0.429935	3	3	0.00385851	0.485753	0.485753
sp|P34948|MPI_CANAL	Mannose-6-phosphate isomerase	PMI1	P34948	0.328422	0	6571.93	0	10235.4			1.55744	3	3	0.00192804	0.486126	0.486126
tr|A0A1D8PG96|A0A1D8PG96_CANAL	Endoplasmic reticulum chaperone BiP	KAR2	A0A1D8PG96	0.334846	579807	279483	446623	161266	0.482028	0.770296	0.577015	3	3	-0.013009	-0.482413	0.482413
sp|Q59MV9|FHP_CANAL	Flavohemoprotein	YHB1	Q59MV9	0.336278	291527	96960	295398	89526.7	0.332594	1.01328	0.923337	3	3	-0.010429	-0.47986	0.47986
tr|A0A1D8PK65|A0A1D8PK65_CANAL	Fatty acid synthase subunit alpha	FAS2	A0A1D8PK65	0.337207	3899670	2861800	1449200	789076	0.733858	0.371621	0.275727	3	3	-0.0240537	-0.478799	0.478799
sp|Q59KZ1|APE2_CANAL	Aminopeptidase 2	APE2	Q59KZ1	0.337701	279955	881650	339543	895528	3.14925	1.21285	1.01574	3	3	0.018313	0.478543	0.478543
tr|Q5AJX0|Q5AJX0_CANAL	Histidine--tRNA ligase	HTS1	Q5AJX0	0.340209	9989.2	26955.3	11858.7	24439.5	2.69845	1.18716	0.906666	3	3	0.00306624	0.476078	0.476078
tr|Q5AI20|Q5AI20_CANAL	Fe-S cluster-binding ribosome biosynthesis protein	RLI1	Q5AI20	0.345132	128699	174213	60533.4	42070.3	1.35365	0.470347	0.241487	3	3	0.00500434	0.472278	0.472278
sp|P87206|IF4A_CANAL	ATP-dependent RNA helicase eIF4A	TIF1	P87206	0.347061	5921890	18774100	7927430	19349300	3.17029	1.33867	1.03064	3	3	0.0838121	0.469871	0.469871
tr|A0A1D8PEG2|A0A1D8PEG2_CANAL	Glucose-6-phosphate 1-dehydrogenase	ZWF1	A0A1D8PEG2	0.347892	930569	43597	1445360	39159	0.0468498	1.5532	0.898203	3	3	-0.0219247	-0.467531	0.467531
tr|A0A1D8PRR7|A0A1D8PRR7_CANAL	Biotin carboxylase	ACC1	A0A1D8PRR7	0.354437	205021	69276.5	192895	115226	0.337899	0.940855	1.66328	3	3	-0.00857854	-0.464823	0.464823
tr|Q59YC4|Q59YC4_CANAL	CCT-beta	CCT2	Q59YC4	0.355001	42070	119887	72867.4	106418	2.84969	1.73205	0.887657	3	3	0.00647594	0.46321	0.46321
sp|P25997|EF3_CANAL	Elongation factor 3	CEF3	P25997	0.357697	9014370	5972170	4878050	1396440	0.662516	0.541142	0.233825	3	3	-0.0403273	-0.460197	0.460197
tr|A0A1D8PKB6|A0A1D8PKB6_CANAL	Beta-glucan synthesis-associated protein	KRE6	A0A1D8PKB6	0.361699	0	88049.2	0	148231			1.68351	3	3	0.00684694	0.457586	0.457586
tr|Q5ALM0|Q5ALM0_CANAL	Aspartate-semialdehyde dehydrogenase	HOM2	Q5ALM0	0.362073	44334.6	2527.6	70307.6	4377.93	0.0570119	1.58584	1.73205	3	3	-0.00470995	-0.456647	0.456647
sp|Q5APD4|C9MT_CANAL	Sphingolipid C9-methyltransferase	MTS1	Q5APD4	0.362142	4769020	1641850	5222860	703668	0.344275	1.09516	0.428581	3	3	-0.0408032	-0.457383	0.457383
tr|A0A1D8PHF5|A0A1D8PHF5_CANAL	Ribosomal 60S subunit protein L31B	orf19.3572.3	A0A1D8PHF5	0.366822	42897.7	281325	63902.1	401157	6.55805	1.48964	1.42596	3	3	0.011212	0.453199	0.453199
tr|A0A1D8PQN0|A0A1D8PQN0_CANAL	Ribosomal 40S subunit protein S28B	RPS28B	A0A1D8PQN0	0.366988	30314	1586.53	48885.4	2747.96	0.0523367	1.61264	1.73205	3	3	-0.00388668	-0.45253	0.45253
tr|Q5AEC9|Q5AEC9_CANAL	NADH-ubiquinone reductase (H(+)-translocating)	NDE1	Q5AEC9	0.36959	4716	901.067	6494.84	781.07	0.191066	1.37719	0.866828	3	3	-0.00141427	-0.450773	0.450773
tr|A0A1D8PQ26|A0A1D8PQ26_CANAL	Adenosine kinase	ADO1	A0A1D8PQ26	0.370754	2115210	1265630	1453320	147285	0.598348	0.687081	0.116372	3	3	-0.0210977	-0.450126	0.450126
tr|A0A1D8PHA3|A0A1D8PHA3_CANAL	Ubiquinol--cytochrome-c reductase catalytic subunit	CYT1	A0A1D8PHA3	0.372785	0	46907.9	0	81035.9			1.72756	3	3	0.00494653	0.448289	0.448289
sp|O13426|GLYC_CANAL	Serine hydroxymethyltransferase, cytosolic	SHM2	O13426	0.373558	1461910	7389.67	2517280	6449.63	0.0050548	1.72191	0.872791	3	3	-0.0274115	-0.445801	0.445801
tr|Q59WE5|Q59WE5_CANAL	Pho100p	PHO100	Q59WE5	0.374007	246340	854012	61951.4	1050950	3.4668	0.251488	1.23061	3	3	0.0177778	0.447125	0.447125
tr|Q5ABC3|Q5ABC3_CANAL	Elongation factor Tu	TUF1	Q5ABC3	0.380253	2646.37	181470	4583.64	314315	68.5733	1.73205	1.73205	3	3	0.00959035	0.442051	0.442051
sp|Q9HGT6|SYSC_CANAL	Serine--tRNA ligase, cytoplasmic	SES1	Q9HGT6	0.38055	867573	1741780	877993	1262530	2.00765	1.01201	0.724851	3	3	0.0211867	0.441556	0.441556
tr|A0A1D8PTW6|A0A1D8PTW6_CANAL	3-hydroxy-3-methylglutaryl coenzyme A synthase	ERG13	A0A1D8PTW6	0.380739	466637	210643	450384	10731	0.451408	0.965171	0.0509438	3	3	-0.011472	-0.441753	0.441753
tr|A0A1D8PKL0|A0A1D8PKL0_CANAL	Peptidyl-prolyl cis-trans isomerase (Fragment)	CYP5	A0A1D8PKL0	0.385519	1356960	226394	2007070	139792	0.166839	1.47909	0.61747	3	3	-0.0239813	-0.437448	0.437448
sp|Q9HFQ7|RLA1_CANAL	60S acidic ribosomal protein P1-A	RPP1A	Q9HFQ7	0.386351	29633.8	3042.49	47335.5	2708.63	0.102669	1.59735	0.890269	3	3	-0.00367241	-0.436459	0.436459
tr|Q5AIA2|Q5AIA2_CANAL	Homoserine dehydrogenase	HOM6	Q5AIA2	0.388988	4567.6	1542.13	5207.98	1528.83	0.337624	1.1402	0.991372	3	3	-0.00123371	-0.433607	0.433607
tr|Q5A1Q0|Q5A1Q0_CANAL	Glucose-6-phosphate 1-epimerase	orf19.1946	Q5A1Q0	0.390806	16442.7	155857	8270.21	251038	9.47881	0.502973	1.6107	3	3	0.00838339	0.43331	0.43331
tr|Q5AG43|Q5AG43_CANAL	Ribosomal 40S subunit protein S5	RPS5	Q5AG43	0.392127	3572200	1179760	4309740	346350	0.330261	1.20647	0.293577	3	3	-0.0346506	-0.431796	0.431796
tr|Q59WE2|Q59WE2_CANAL	E3 ubiquitin ligase complex SCF subunit	SKP1	Q59WE2	0.393164	45514.7	85134.3	12615.4	70656.7	1.87048	0.277173	0.829944	3	3	0.00445446	0.430924	0.430924
tr|Q5A8X6|Q5A8X6_CANAL	Succinate--CoA ligase [ADP-forming] subunit alpha, mitochondrial	LSC1	Q5A8X6	0.395232	9817.33	206973	17004.1	358488	21.0824	1.73205	1.73205	3	3	0.00992969	0.429773	0.429773
tr|A0A1D8PS71|A0A1D8PS71_CANAL	Acid phosphatase	PHO112	A0A1D8PS71	0.396343	203051	495567	174441	504556	2.4406	0.859099	1.01814	3	3	0.0120894	0.429122	0.429122
sp|Q5AJC0|UTR2_CANAL	Extracellular glycosidase UTR2	UTR2	Q5AJC0	0.398614	18441.7	1006.53	31941.9	1743.37	0.0545793	1.73205	1.73205	3	3	-0.00295658	-0.428929	0.428929
sp|Q5AI86|EIF3I_CANAL	Eukaryotic translation initiation factor 3 subunit I	TIF34	Q5AI86	0.39868	38940.7	80536.7	29451.5	70420.1	2.06819	0.756317	0.874386	3	3	0.00454459	0.426825	0.426825
tr|Q5AMN0|Q5AMN0_CANAL	Proliferating cell nuclear antigen	POL30	Q5AMN0	0.399952	255007	349117	160865	64219.7	1.36905	0.630825	0.183949	3	3	0.00680755	0.424547	0.424547
tr|A0A1D8PL14|A0A1D8PL14_CANAL	Ornithine aminotransferase	CAR2	A0A1D8PL14	0.400097	3469230	6194600	2457060	4375030	1.78558	0.708242	0.706265	3	3	0.0367527	0.425863	0.425863
tr|A0A1D8PGP3|A0A1D8PGP3_CANAL	Pdr17p	PDR17	A0A1D8PGP3	0.40137	26180	42986.7	24231.8	19391.3	1.64197	0.925585	0.451101	3	3	0.00287482	0.423675	0.423675
tr|Q5AF44|Q5AF44_CANAL	Thioredoxin peroxidase	AHP1	Q5AF44	0.403849	24842.7	329209	9855.33	565230	13.2518	0.39671	1.71693	3	3	0.0122276	0.422448	0.422448
tr|A0A1D8PCR4|A0A1D8PCR4_CANAL	Dip5p	DIP5	A0A1D8PCR4	0.41162	208370	39823	316844	35234.5	0.191117	1.52058	0.884777	3	3	-0.00903056	-0.416131	0.416131
sp|P30575|ENO1_CANAL	Enolase 1	ENO1	P30575	0.416398	18007200	30591000	16371700	17644200	1.69882	0.909176	0.576778	3	3	0.0775233	0.411517	0.411517
tr|A0A1D8PFL9|A0A1D8PFL9_CANAL	Ribosomal 60S subunit protein L14B	RPL14	A0A1D8PFL9	0.42004	356720	779357	202085	789903	2.18479	0.566509	1.01353	3	3	0.0141996	0.409837	0.409837
tr|Q59T35|Q59T35_CANAL	Fumarate reductase	OSM1	Q59T35	0.420336	318454	40771	534110	45854.9	0.128028	1.67719	1.12469	3	3	-0.0114861	-0.408875	0.408875
sp|Q59PT0|VATB_CANAL	V-type proton ATPase subunit B	VMA2	Q59PT0	0.421681	19237.7	1944.63	33320.6	3368.2	0.101085	1.73205	1.73205	3	3	-0.00286297	-0.407851	0.407851
sp|Q59L72|PGA52_CANAL	GPI-anchored protein 52	PGA52	Q59L72	0.430089	134891	310270	217422	269718	2.30015	1.61183	0.869302	3	3	0.00905421	0.401686	0.401686
sp|P0C8L0|CYB_CANAL	Cytochrome b	COB	P0C8L0	0.431443	9868.67	79510	8993.81	137715	8.05681	0.91135	1.73205	3	3	0.00569793	0.400613	0.400613
tr|Q59VP4|Q59VP4_CANAL	Nudix hydrolase domain-containing protein	orf19.1049	Q59VP4	0.434639	53034.3	33813.7	37255.9	9214.4	0.637581	0.702486	0.272505	3	3	-0.00297791	-0.397273	0.397273
tr|A0A1D8PCQ5|A0A1D8PCQ5_CANAL	Ribosomal 60S subunit protein L26B	orf19.3690.2	A0A1D8PCQ5	0.437779	105820	785100	134376	1359830	7.41923	1.26986	1.73205	3	3	0.0176769	0.395444	0.395444
tr|Q59SM8|Q59SM8_CANAL	Formyltetrahydrofolate synthetase	MIS11	Q59SM8	0.446335	374000	163670	325695	283485	0.43762	0.870843	1.73205	3	3	-0.00975167	-0.388685	0.388685
sp|P82610|METE_CANAL	5-methyltetrahydropteroyltriglutamate--homocysteine methyltransferase	MET6	P82610	0.447406	4193500	4937230	114079	1526460	1.17735	0.0272038	0.309172	3	3	0.0183183	0.387862	0.387862
tr|Q5AJF7|Q5AJF7_CANAL	Ribosomal 60S subunit protein L12A	RPL12	Q5AJF7	0.451627	201323	886745	148716	1417190	4.40458	0.738693	1.59819	3	3	0.0175038	0.384408	0.384408
sp|Q59S78|SAR1_CANAL	Small COPII coat GTPase SAR1	SAR1	Q59S78	0.451992	1429450	724512	1354580	562725	0.506848	0.947626	0.776696	3	3	-0.0177026	-0.383215	0.383215
sp|Q59XU5|RAS1_CANAL	Ras-like protein 1	RAS1	Q59XU5	0.454723	61734.7	37198	42248	29257.8	0.602546	0.684348	0.786542	3	3	-0.00329024	-0.380706	0.380706
sp|P46250|SEC14_CANAL	SEC14 cytosolic factor	SEC14	P46250	0.455958	859563	1720690	1318620	1238290	2.00182	1.53405	0.719646	3	3	0.019541	0.381184	0.381184
sp|Q59K86|3HAO_CANAL	3-hydroxyanthranilate 3,4-dioxygenase	BNA1	Q59K86	0.45995	217780	37326.7	377206	64651.7	0.171396	1.73205	1.73205	3	3	-0.0088992	-0.377669	0.377669
sp|P83774|GBLP_CANAL	Guanine nucleotide-binding protein subunit beta-like protein	ASC1	P83774	0.461319	15587000	22127900	2831350	13626600	1.41964	0.181648	0.615813	3	3	0.0535994	0.377286	0.377286
tr|Q59PH5|Q59PH5_CANAL	Vtc4p	VTC4	Q59PH5	0.462482	16670.3	94820	28873.9	164233	5.68795	1.73205	1.73205	3	3	0.00584155	0.375728	0.375728
tr|Q5AMP9|Q5AMP9_CANAL	F-actin-capping protein subunit beta	orf19.4597	Q5AMP9	0.463073	44046.7	7789	76291.1	13490.9	0.176835	1.73205	1.73205	3	3	-0.00400218	-0.377695	0.377695
tr|A0A1D8PQS0|A0A1D8PQS0_CANAL	60S acidic ribosomal protein P0	RPP0	A0A1D8PQS0	0.469686	5877330	12964400	3575190	14965900	2.20583	0.608302	1.15438	3	3	0.0552773	0.370575	0.370575
sp|P83775|GRP2_CANAL	Putative NADPH-dependent methylglyoxal reductase GRP2	GRP2	P83775	0.470748	42256	205697	16806.5	355368	4.86788	0.39773	1.72763	3	3	0.00837873	0.36947	0.36947
tr|A0A1D8PCY4|A0A1D8PCY4_CANAL	Ecm33p	ECM33	A0A1D8PCY4	0.470874	836103	1471800	519204	1283090	1.76031	0.620981	0.871781	3	3	0.0165336	0.369629	0.369629
sp|Q5AC48|ARP4_CANAL	Actin-related protein 4	ARP4	Q5AC48	0.488727	14468	3251.3	25059.3	4770.05	0.224724	1.73205	1.46712	3	3	-0.00215239	-0.355473	0.355473
tr|Q5A5Q8|Q5A5Q8_CANAL	40S ribosomal protein S4	RPS4A	Q5A5Q8	0.489547	1469330	2965130	2236970	2571910	2.01801	1.52244	0.867387	3	3	0.0248793	0.355499	0.355499
sp|Q96VB9|HSP7F_CANAL	Heat shock protein homolog SSE1	MSI3	Q96VB9	0.490631	4413370	5318330	1680830	1204320	1.20505	0.38085	0.226447	3	3	0.0193688	0.3554	0.3554
tr|Q5AB84|Q5AB84_CANAL	Uncharacterized protein	orf19.6090	Q5AB84	0.491396	4544.27	2452.37	4674.97	1037.79	0.539662	1.02876	0.423181	3	3	-0.000929668	-0.354511	0.354511
tr|A0A1D8PTV4|A0A1D8PTV4_CANAL	Tubulin alpha chain	TUB1	A0A1D8PTV4	0.498727	1213230	746573	910739	594865	0.615358	0.750671	0.796793	3	3	-0.0137855	-0.349177	0.349177
tr|Q5AB94|Q5AB94_CANAL	Vacuolar protein sorting-associated protein 29	orf19.6076	Q5AB94	0.504093	28551.7	53148.7	11706.9	56914.8	1.86149	0.410026	1.07086	3	3	0.00314407	0.344847	0.344847
tr|Q59R27|Q59R27_CANAL	Uncharacterized protein	orf19.6693	Q59R27	0.507279	19396.7	64095.9	25319.7	103382	3.30448	1.30536	1.61293	3	3	0.00421322	0.341598	0.341598
tr|A0A1D8PPX6|A0A1D8PPX6_CANAL	Uncharacterized protein	orf19.5525	A0A1D8PPX6	0.512451	50962.7	32579.3	44289.6	2230.66	0.639278	0.86906	0.0684686	3	3	-0.00267142	-0.335807	0.335807
sp|O93852|ALO_CANAL	D-arabinono-1,4-lactone oxidase	ALO1	O93852	0.515008	35561.7	78123.7	22799.7	100788	2.19685	0.641132	1.29011	3	3	0.0040764	0.335805	0.335805
tr|A0A1D8PMW6|A0A1D8PMW6_CANAL	Actin-depolymerizing factor 1	COF1	A0A1D8PMW6	0.515517	1476140	1750170	484412	457281	1.18564	0.328161	0.261279	3	3	0.0103821	0.336869	0.336869
tr|A0A1D8PCW6|A0A1D8PCW6_CANAL	Ribosomal 40S subunit protein S16A	RPS16A	A0A1D8PCW6	0.521474	203610	108540	140378	187997	0.533078	0.689445	1.73205	3	3	-0.00604065	-0.330541	0.330541
tr|A0A1D8PNS0|A0A1D8PNS0_CANAL	Guanylate kinase	GUK1	A0A1D8PNS0	0.527569	41304.3	109295	16048.3	169664	2.64608	0.388538	1.55235	3	3	0.00508142	0.326526	0.326526
sp|Q9P975|IF4E_CANAL	Eukaryotic translation initiation factor 4E	TIF45	Q9P975	0.529069	34659.3	27532.7	13683.6	11589.5	0.79438	0.394804	0.420938	3	3	-0.00164952	-0.326831	0.326831
sp|Q5A5U4|RHD3_CANAL	Cell wall protein RHD3	RHD3	Q5A5U4	0.53262	22407.3	7021.47	38810.6	4481.81	0.313356	1.73205	0.6383	3	3	-0.00241965	-0.324959	0.324959
tr|A0A1D8PLC9|A0A1D8PLC9_CANAL	60S ribosomal protein L20	RPL20B	A0A1D8PLC9	0.532729	5793470	6948700	1239690	2659510	1.1994	0.213981	0.382734	3	3	0.0208291	0.322789	0.322789
tr|Q5ALV6|Q5ALV6_CANAL	40S ribosomal protein S26	RPS26A	Q5ALV6	0.534743	258510	132353	226267	229243	0.511985	0.875273	1.73205	3	3	-0.00689841	-0.32275	0.32275
tr|A0A1D8PG81|A0A1D8PG81_CANAL	Hgt7p	HGT7	A0A1D8PG81	0.540755	80410	191154	69664.5	278610	2.37724	0.866367	1.45751	3	3	0.00638851	0.316792	0.316792
tr|A0A1D8PJA8|A0A1D8PJA8_CANAL	Tos1p	TOS1	A0A1D8PJA8	0.541543	186402	368207	198997	428477	1.97534	1.06757	1.16369	3	3	0.00817253	0.316001	0.316001
sp|Q5AKA5|DUG1_CANAL	Cys-Gly metallodipeptidase DUG1	DUG1	Q5AKA5	0.543447	181880	519728	138912	871285	2.85753	0.763755	1.67642	3	3	0.0111032	0.314232	0.314232
tr|A0A1D8PPE0|A0A1D8PPE0_CANAL	Ribosomal 40S subunit protein S13	RPS13	A0A1D8PPE0	0.546709	3188200	4339230	2186320	2100260	1.36103	0.685754	0.484015	3	3	0.0205403	0.31373	0.31373
tr|Q5A8Y6|Q5A8Y6_CANAL	Mitochondrial 54S ribosomal protein YmL23	orf19.3348	Q5A8Y6	0.547253	14008	41916.7	12158	72601.8	2.99234	0.867935	1.73205	3	3	0.00317967	0.311692	0.311692
tr|Q5AIA6|Q5AIA6_CANAL	Pyridoxal 5'-phosphate synthase (glutamine hydrolyzing)	SNZ1	Q5AIA6	0.547727	140370	242023	172996	205285	1.72418	1.23243	0.848205	3	3	0.00606972	0.311586	0.311586
tr|A0A1D8PCI5|A0A1D8PCI5_CANAL	Arginyl-tRNA synthetase	orf19.3341	A0A1D8PCI5	0.547828	1565900	1033030	1165360	789504	0.659707	0.744214	0.764258	3	3	-0.0139531	-0.312812	0.312812
tr|A0A1D8PLV4|A0A1D8PLV4_CANAL	Uncharacterized protein	orf19.3378	A0A1D8PLV4	0.548166	41523.4	120825	30000.3	207513	2.9098	0.72249	1.71746	3	3	0.00536106	0.311426	0.311426
tr|A0A1D8PF68|A0A1D8PF68_CANAL	S-adenosylmethionine synthase	SAM2	A0A1D8PF68	0.550699	3252520	5133400	2817130	4138350	1.57828	0.866136	0.806161	3	3	0.0259987	0.309178	0.309178
tr|Q5AIA0|Q5AIA0_CANAL	Tom20p	TOM20	Q5AIA0	0.563432	58203	85908.3	35503.2	67514.8	1.47601	0.609989	0.785893	3	3	0.00311794	0.300853	0.300853
sp|P10613|CP51_CANAL	Lanosterol 14-alpha demethylase	ERG11	P10613	0.563476	230060	308500	177531	123027	1.34095	0.771672	0.398791	3	3	0.00523266	0.300054	0.300054
tr|Q5AKW4|Q5AKW4_CANAL	Phosphoacetylglucosamine mutase	AGM1	Q5AKW4	0.567178	275140	375521	53927.8	273918	1.36483	0.196001	0.729436	3	3	0.00589505	0.297466	0.297466
tr|Q59LZ5|Q59LZ5_CANAL	Protein channel	TOM70	Q59LZ5	0.569902	68834	40046.8	56323.9	57729.8	0.581788	0.818257	1.44156	3	3	-0.00312778	-0.293733	0.293733
tr|Q5AJD9|Q5AJD9_CANAL	Acyl-coenzyme A oxidase	POX1-3	Q5AJD9	0.573375	73289.7	99004.7	33206.6	64706.4	1.35087	0.453087	0.653569	3	3	0.00296996	0.293834	0.293834
tr|Q5A6A1|Q5A6A1_CANAL	Ribosomal 60S subunit protein L24A	RPL24A	Q5A6A1	0.5778	1090720	1191740	173992	230994	1.09262	0.15952	0.193829	3	3	0.00584462	0.29013	0.29013
tr|A0A1D8PU61|A0A1D8PU61_CANAL	S-(hydroxymethyl)glutathione dehydrogenase	FDH3	A0A1D8PU61	0.579663	165263	227287	149864	96905.6	1.3753	0.906822	0.426358	3	3	0.00452963	0.286291	0.286291
tr|A0A1D8PGY8|A0A1D8PGY8_CANAL	Ribosomal 40S subunit protein S9B	RPS9B	A0A1D8PGY8	0.584183	4329690	5734300	4011100	811621	1.32441	0.926419	0.141538	3	3	0.0214865	0.28374	0.28374
sp|Q5AFI4|DFI1_CANAL	Cell-surface associated glycoprotein DFI1	DFI1	Q5AFI4	0.587123	80056	183290	19466.9	302618	2.28952	0.243165	1.65103	3	3	0.00583316	0.283071	0.283071
tr|Q59RI1|Q59RI1_CANAL	Isoleucyl-tRNA synthetase	ILS1	Q59RI1	0.588358	3047200	2715470	825675	523798	0.891135	0.270962	0.192894	3	3	-0.0104342	-0.28202	0.28202
tr|Q5AI79|Q5AI79_CANAL	Palmitoyltransferase	YKT6	Q5AI79	0.592056	30144.2	52224.6	45174.5	47788.4	1.73249	1.49861	0.915055	3	3	0.00269157	0.280639	0.280639
sp|P43065|LYS1_CANAL	Saccharopine dehydrogenase [NAD(+), L-lysine-forming]	LYS1	P43065	0.595677	381001	179993	603014	46280.8	0.472422	1.58271	0.257125	3	3	-0.00803106	-0.276227	0.276227
tr|A0A1D8PKC3|A0A1D8PKC3_CANAL	Translation elongation factor EF1B gamma	CAM1	A0A1D8PKC3	0.60501	3876770	4532930	1041480	1739520	1.16926	0.268648	0.383752	3	3	0.0143569	0.269967	0.269967
sp|P83776|HXKB_CANAL	Hexokinase-2	HXK2	P83776	0.608189	2236130	1098510	3004640	1885880	0.491254	1.34368	1.71676	3	3	-0.0187191	-0.266193	0.266193
tr|Q5AGZ7|Q5AGZ7_CANAL	Ribosomal 60S subunit protein L5	RPL5	Q5AGZ7	0.608956	997417	580593	848629	988325	0.582097	0.850827	1.70227	3	3	-0.0113621	-0.266651	0.266651
tr|A0A1D8PQL8|A0A1D8PQL8_CANAL	Glutamyl-tRNA synthetase	GUS1	A0A1D8PQL8	0.610774	53400.7	121600	47209.2	209000	2.27713	0.884056	1.71875	3	3	0.00459215	0.265782	0.265782
tr|A0A1D8PMT6|A0A1D8PMT6_CANAL	Coatomer subunit epsilon	orf19.5689	A0A1D8PMT6	0.621381	522256	772767	553041	594447	1.47967	1.05895	0.769245	3	3	0.00865807	0.257699	0.257699
sp|P83773|ACH1_CANAL	Acetyl-CoA hydrolase	ACH1	P83773	0.623306	70257.7	134205	59260.6	199845	1.91018	0.843475	1.4891	3	3	0.0043695	0.256724	0.256724
tr|Q59UY6|Q59UY6_CANAL	Acid phosphatase	PHO113	Q59UY6	0.626718	601093	843604	405916	687739	1.40345	0.675297	0.815239	3	3	0.00845564	0.253898	0.253898
tr|A0A1D8PTI2|A0A1D8PTI2_CANAL	Rab family GTPase	YPT31	A0A1D8PTI2	0.634922	90749	108948	44088.8	42784	1.20055	0.485832	0.3927	3	3	0.00229379	0.24852	0.24852
tr|Q59KV8|Q59KV8_CANAL	Lipid-binding protein	LSP1	Q59KV8	0.654111	666847	740257	197419	173853	1.11009	0.296049	0.234855	3	3	0.0045106	0.236583	0.236583
tr|A0A1D8PPT5|A0A1D8PPT5_CANAL	Ribosomal 60S subunit protein L23B	RPL23A	A0A1D8PPT5	0.662947	1346050	723633	2286430	193288	0.537596	1.69862	0.267108	3	3	-0.012845	-0.22829	0.22829
tr|A0A1D8PPG7|A0A1D8PPG7_CANAL	Ketol-acid reductoisomerase, mitochondrial	ILV5	A0A1D8PPG7	0.682633	1143780	2178080	1948400	3574490	1.90428	1.70347	1.64112	3	3	0.0160934	0.21508	0.21508
sp|P40910|RS3A_CANAL	40S ribosomal protein S1	RPS1	P40910	0.68278	17273700	25018400	23237600	19752800	1.44835	1.34526	0.78953	3	3	0.0440245	0.214963	0.214963
tr|G1UB11|G1UB11_CANAL	C-22 sterol desaturase	ERG5	G1UB11	0.692415	498750	368323	484673	216935	0.738493	0.971776	0.58898	3	3	-0.00567432	-0.210134	0.210134
sp|Q59PL9|EIF3A_CANAL	Eukaryotic translation initiation factor 3 subunit A	RPG1A	Q59PL9	0.696601	672837	739627	237204	141028	1.09927	0.352543	0.190674	3	3	0.0040008	0.205585	0.205585
sp|Q8TG40|KAD6_CANAL	Adenylate kinase isoenzyme 6 homolog HBR1	HBR1	Q8TG40	0.698197	27304.3	35515.9	11887.4	31983.4	1.30074	0.435365	0.900537	3	3	0.00140044	0.20468	0.20468
tr|Q59TD5|Q59TD5_CANAL	NADH dehydrogenase [ubiquinone] flavoprotein 1, mitochondrial	NDH51	Q59TD5	0.700476	259373	285510	16820.4	108191	1.10077	0.06485	0.37894	3	3	0.00248578	0.202846	0.202846
sp|P0CH96|PURA_CANAL	Adenylosuccinate synthetase	ADE12	P0CH96	0.703861	290383	332610	12314.1	178639	1.14542	0.0424064	0.537081	3	3	0.0031345	0.200062	0.200062
tr|Q59R18|Q59R18_CANAL	Asparaginyl-tRNA synthetase	DED81	Q59R18	0.710439	676933	789077	231867	428376	1.16566	0.342525	0.542883	3	3	0.00506698	0.196175	0.196175
tr|Q5A6R2|Q5A6R2_CANAL	5-aminoimidazole-4-carboxamide ribonucleotide formyltransferase	ADE17	Q5A6R2	0.710894	97610.3	161399	74071.5	267468	1.6535	0.758849	1.65719	3	3	0.00379405	0.194609	0.194609
tr|A0A1D8PCQ3|A0A1D8PCQ3_CANAL	Eukaryotic translation initiation factor 2A	orf19.2930	A0A1D8PCQ3	0.71111	294222	397057	285445	345001	1.34952	0.97017	0.868897	3	3	0.00481813	0.194568	0.194568
tr|Q59UF7|Q59UF7_CANAL	Aspartyl-tRNA synthetase	DPS1-1	Q59UF7	0.720284	777097	539178	587860	896667	0.693836	0.756482	1.66303	3	3	-0.00720728	-0.188207	0.188207
sp|Q5ANA3|CDR1_CANAL	Pleiotropic ABC efflux transporter of multiple drugs CDR1	CDR1	Q5ANA3	0.720378	242810	167191	199589	276366	0.688567	0.821998	1.65299	3	3	-0.00409731	-0.189752	0.189752
tr|A0A1D8PFS4|A0A1D8PFS4_CANAL	6-phosphogluconate dehydrogenase, decarboxylating	GND1	A0A1D8PFS4	0.723216	11574100	13259700	7347330	2240620	1.14563	0.634806	0.16898	3	3	0.0191928	0.187286	0.187286
sp|Q5A4M8|SUR7_CANAL	Protein SUR7	SUR7	Q5A4M8	0.735972	805481	557959	719038	942878	0.692703	0.892681	1.68987	3	3	-0.00718345	-0.178558	0.178558
sp|Q5ALX8|APT_CANAL	Adenine phosphoribosyltransferase	APT1	Q5ALX8	0.740442	1437140	1868900	1970390	743310	1.30043	1.37105	0.397726	3	3	0.00939021	0.175194	0.175194
tr|Q59PZ6|Q59PZ6_CANAL	6-phosphogluconolactonase-like protein	SOL3	Q59PZ6	0.741799	39345	29277.6	9590.73	48435.3	0.744126	0.24376	1.65434	3	3	-0.00143198	-0.174495	0.174495
tr|Q59YH4|Q59YH4_CANAL	T-complex protein 1 subunit eta	CCT7	Q59YH4	0.744923	195130	208200	33818.8	55425.4	1.06698	0.173314	0.266212	3	3	0.00162675	0.172898	0.172898
tr|A0A1D8PLD7|A0A1D8PLD7_CANAL	DLH domain-containing protein	orf19.4609	A0A1D8PLD7	0.750981	116608	81822.3	116612	133453	0.701687	1.00003	1.63101	3	3	-0.00260398	-0.16758	0.16758
tr|A0A1D8PDL6|A0A1D8PDL6_CANAL	Ribosomal 60S subunit protein L7A	orf19.2478.1	A0A1D8PDL6	0.755941	8896200	10110200	5752520	2609510	1.13646	0.646626	0.258107	3	3	0.0151439	0.16329	0.16329
tr|A0A1D8PU17|A0A1D8PU17_CANAL	Lysophospholipase	PLB3	A0A1D8PU17	0.764136	325663	293577	51467.6	165189	0.901473	0.158039	0.562677	3	3	-0.00242463	-0.15804	0.15804
tr|A0A1D8PKB9|A0A1D8PKB9_CANAL	Branched-chain-amino-acid aminotransferase	BAT22	A0A1D8PKB9	0.769815	136312	170885	102944	161151	1.25363	0.755209	0.943039	3	3	0.00250927	0.155626	0.155626
sp|Q5AA33|PGA45_CANAL	Predicted GPI-anchored protein 45	PGA45	Q5AA33	0.770309	1386.57	2198.77	2401.6	3808.38	1.58576	1.73205	1.73205	3	3	0.000378468	0.152977	0.152977
sp|Q5AF03|HSP31_CANAL	Glyoxalase 3	GLX3	Q5AF03	0.772661	17467.7	22182.9	10517	24236.5	1.26994	0.602084	1.09258	3	3	0.000921333	0.153753	0.153753
tr|A0A1D8PDA4|A0A1D8PDA4_CANAL	Fma1p	FMA1	A0A1D8PDA4	0.789995	1344280	1052270	1171310	1335540	0.782778	0.871333	1.2692	3	3	-0.00689117	-0.140372	0.140372
tr|A0A1D8PPY8|A0A1D8PPY8_CANAL	Fimbrin	SAC6	A0A1D8PPY8	0.79519	42614.3	59672.2	37624.9	99623.3	1.40029	0.882917	1.66951	3	3	0.00165183	0.13746	0.13746
tr|A0A1D8PH21|A0A1D8PH21_CANAL	60S ribosomal protein L36	RPL39	A0A1D8PH21	0.797522	30401.3	42742.4	35825	69241.3	1.40594	1.1784	1.61997	3	3	0.00139982	0.13616	0.13616
tr|A0A1D8PSR2|A0A1D8PSR2_CANAL	tRNA (Cytosine-5-)-methyltransferase	CAALFM_CR04300WA	A0A1D8PSR2	0.79959	123295	103798	111628	55068	0.841872	0.905378	0.530529	3	3	-0.00174579	-0.134404	0.134404
sp|Q59WG7|BIG1_CANAL	Protein BIG1	BIG1	Q59WG7	0.800876	80640	107673	139673	103330	1.33523	1.73205	0.959666	3	3	0.00202016	0.131649	0.131649
tr|A0A1D8PP39|A0A1D8PP39_CANAL	Aamy domain-containing protein	orf19.3982	A0A1D8PP39	0.803347	227387	292490	280776	317482	1.28631	1.2348	1.08545	3	3	0.00318335	0.132838	0.132838
sp|Q9P8V9|LIP8_CANAL	Lipase 8	LIP8	Q9P8V9	0.804879	119129	165022	120732	275932	1.38525	1.01346	1.67209	3	3	0.00264359	0.130869	0.130869
tr|A0A1D8PGU0|A0A1D8PGU0_CANAL	Hsp70 family chaperone	LHS1	A0A1D8PGU0	0.805871	210483	166410	278377	83962.4	0.790609	1.32256	0.504551	3	3	-0.00256656	-0.12932	0.12932
sp|Q5ANE3|NCE2_CANAL	Non-classical export protein 102	NCE102	Q5ANE3	0.806888	128503	176652	109924	299861	1.3747	0.855424	1.69746	3	3	0.00268539	0.12911	0.12911
tr|A0A1D8PP43|A0A1D8PP43_CANAL	Adh1p	ADH1	A0A1D8PP43	0.811166	12755400	11103500	9534070	5900110	0.870497	0.747454	0.531372	3	3	-0.0153935	-0.124934	0.124934
tr|A0A1D8PHP8|A0A1D8PHP8_CANAL	Putative ammonium permease	FRP3	A0A1D8PHP8	0.813893	1545530	1462330	571052	49808.3	0.946167	0.369486	0.0340608	3	3	-0.00347031	-0.124578	0.124578
sp|Q9P8W1|LIP4_CANAL	Lipase 4	LIP4	Q9P8W1	0.815256	9325730	8899000	2815410	921282	0.954241	0.301897	0.103526	3	3	-0.00780721	-0.123294	0.123294
tr|A0A1D8PDE8|A0A1D8PDE8_CANAL	Obg-like ATPase 1	YBN5	A0A1D8PDE8	0.81895	1139950	1037470	538168	487683	0.910104	0.4721	0.470069	3	3	-0.00378549	-0.120754	0.120754
sp|Q5A302|TMEDA_CANAL	Endoplasmic reticulum vesicle protein 25	ERV25	Q5A302	0.822426	4661.33	3399.6	8073.67	4244.56	0.729319	1.73205	1.24855	3	3	-0.000424628	-0.120884	0.120884
tr|Q5A900|Q5A900_CANAL	Ribosomal 40S subunit protein S2	RPS21	Q5A900	0.839865	2704770	2385930	1511730	2068060	0.882122	0.558914	0.866772	3	3	-0.00632421	-0.107504	0.107504
tr|Q5A6M6|Q5A6M6_CANAL	Coatomer subunit beta	SEC26	Q5A6M6	0.840506	12686	15566.2	21972.8	7557.49	1.22704	1.73205	0.485505	3	3	0.00060048	0.107179	0.107179
sp|Q5A8K2|SYA_CANAL	Alanine--tRNA ligase	ALA1	Q5A8K2	0.861247	127903	160203	114650	277480	1.25253	0.896383	1.73205	3	3	0.00186218	0.0925316	0.0925316
tr|Q5A5A0|Q5A5A0_CANAL	Thioredoxin peroxidase	PRX1	Q5A5A0	0.871473	1052760	987383	579371	309260	0.937897	0.550334	0.313212	3	3	-0.00254165	-0.0854181	0.0854181
tr|A0A1D8PEI2|A0A1D8PEI2_CANAL	Dihydroxyacetone kinase	DAK2	A0A1D8PEI2	0.872182	31882	28412.3	24207	25346.2	0.891172	0.759268	0.892085	3	3	-0.000583604	-0.0849033	0.0849033
tr|Q59LS1|Q59LS1_CANAL	Ribosomal 60S subunit protein L3	RPL3	Q59LS1	0.875624	7027870	6559930	3182670	3671850	0.933417	0.452864	0.559738	3	3	-0.00675115	-0.0834218	0.0834218
tr|A0A1D8PPS9|A0A1D8PPS9_CANAL	Clathrin heavy chain (Fragment)	CHC1	A0A1D8PPS9	0.880265	98431.3	111707	99050.7	103500	1.13487	1.00629	0.926535	3	3	0.00112829	0.0812076	0.0812076
tr|Q5AK53|Q5AK53_CANAL	ATP-dependent 6-phosphofructokinase	PFK1	Q5AK53	0.885438	229549	258847	217305	249137	1.12763	0.946663	0.962487	3	3	0.00158315	0.0750196	0.0750196
tr|A0A1D8PKZ3|A0A1D8PKZ3_CANAL	ATP-dependent RNA helicase	SUB2	A0A1D8PKZ3	0.88694	84847.9	99829.8	67642.1	157403	1.17657	0.797216	1.57672	3	3	0.00115773	0.0762111	0.0762111
tr|Q5AFB3|Q5AFB3_CANAL	Tyrosine--tRNA ligase	TYS1	Q5AFB3	0.888147	62188.6	72068.4	53090.4	101120	1.15887	0.853701	1.40311	3	3	0.000942413	0.0759834	0.0759834
sp|Q59QD6|EF1A2_CANAL	Elongation factor 1-alpha 2	TEF2	Q59QD6	0.893498	32323700	30047000	16970600	21832100	0.929567	0.525021	0.726597	3	3	-0.0136885	-0.070938	0.070938
tr|A0A1D8PL85|A0A1D8PL85_CANAL	Aspartate aminotransferase	AAT22	A0A1D8PL85	0.903688	26720.8	29433.3	31361.2	18593.3	1.10151	1.17366	0.63171	3	3	0.00045027	0.0642777	0.0642777
tr|A0A1D8PQB4|A0A1D8PQB4_CANAL	Dipeptidyl peptidase 3	orf19.5773	A0A1D8PQB4	0.905396	451789	412812	405019	347140	0.913727	0.896477	0.840916	3	3	-0.00171882	-0.0641498	0.0641498
sp|Q5ABA2|SVF1_CANAL	Survival factor 1	SVF1	Q5ABA2	0.918894	11882.3	10364	20580.8	12843.6	0.872216	1.73205	1.23926	3	3	-0.000320286	-0.056068	0.056068
tr|Q59S64|Q59S64_CANAL	Non-specific serine/threonine protein kinase	HRR25	Q59S64	0.918903	56559.3	62425.7	89779.9	26955.2	1.10372	1.58736	0.431796	3	3	0.000613355	0.0546224	0.0546224
tr|A0A1D8PGF0|A0A1D8PGF0_CANAL	Lysophospholipase	PLB4.5	A0A1D8PGF0	0.920263	12011700	11428500	9136530	2522400	0.95145	0.760638	0.220711	3	3	-0.0062779	-0.0556004	0.0556004
sp|Q5AEN1|CCPR_CANAL	Cytochrome c peroxidase, mitochondrial	CCP1	Q5AEN1	0.922166	820733	761349	752886	641123	0.927645	0.917333	0.842088	3	3	-0.00188341	-0.0516436	0.0516436
tr|Q5AIB8|Q5AIB8_CANAL	Ribosomal 60S subunit protein L10	RPL10	Q5AIB8	0.923341	2079430	2280930	1480540	3068540	1.0969	0.711995	1.3453	3	3	0.00345547	0.0510471	0.0510471
sp|P40954|CHI3_CANAL	Chitinase 3	CHT3	P40954	0.924181	310610	346127	490904	357412	1.11435	1.58045	1.0326	3	3	0.00145349	0.0508619	0.0508619
tr|A0A1D8PT02|A0A1D8PT02_CANAL	Flavodoxin-like fold family protein	PST3	A0A1D8PT02	0.924642	836973	895731	341691	951249	1.0702	0.408246	1.06198	3	3	0.00187098	0.0507468	0.0507468
tr|A0A1D8PQQ5|A0A1D8PQQ5_CANAL	Ribosomal 40S subunit protein S18B	RPS18	A0A1D8PQQ5	0.937303	6865540	7241200	5900310	5058760	1.05472	0.859409	0.698608	3	3	0.00417441	0.0408389	0.0408389
tr|A0A1D8PMH8|A0A1D8PMH8_CANAL	Glutamate dehydrogenase	GDH3	A0A1D8PMH8	0.937765	40916	39178.3	35661.7	6326.87	0.957531	0.871584	0.161489	3	3	-0.000294535	-0.0422105	0.0422105
tr|A0A1D8PN90|A0A1D8PN90_CANAL	Hsp90 cochaperone	STI1	A0A1D8PN90	0.939709	72287.3	68268.7	73799.9	45062.1	0.944407	1.02092	0.66007	3	3	-0.000431547	-0.0400274	0.0400274
tr|A0A1D8PGG5|A0A1D8PGG5_CANAL	Uncharacterized protein	orf19.1514	A0A1D8PGG5	0.943799	169683	188723	293900	326878	1.11221	1.73205	1.73205	3	3	0.000918201	0.0377751	0.0377751
tr|A0A1D8PRG5|A0A1D8PRG5_CANAL	Ribosomal protein P1B	RPP1B	A0A1D8PRG5	0.9551	154865	145280	116029	251632	0.938109	0.749231	1.73205	3	3	-0.00058599	-0.030368	0.030368
tr|Q5A0Z9|Q5A0Z9_CANAL	Pyruvate dehydrogenase E1 component subunit alpha	PDA1	Q5A0Z9	0.960625	246892	262446	300958	415269	1.063	1.21898	1.5823	3	3	0.00070667	0.0269203	0.0269203
sp|Q5AKU5|UTH1_CANAL	Secreted beta-glucosidase SIM1	SIM1	Q5AKU5	0.962808	1208110	1178300	835444	620871	0.97532	0.691528	0.526923	3	3	-0.000953012	-0.0254839	0.0254839
tr|A0A1D8PJ73|A0A1D8PJ73_CANAL	Ali1p	ALI1	A0A1D8PJ73	0.964704	110209	104512	146351	150042	0.948301	1.32794	1.43565	3	3	-0.000421442	-0.0251143	0.0251143
tr|Q5A017|Q5A017_CANAL	Transaldolase	TAL1	Q5A017	0.968577	30154300	29725000	7966690	15852900	0.985762	0.264197	0.533318	3	3	-0.00305582	-0.0197931	0.0197931
tr|A0A1D8PE45|A0A1D8PE45_CANAL	Nicotinate-nucleotide pyrophosphorylase [carboxylating]	orf19.5054	A0A1D8PE45	0.9704	117023	120012	125507	37905.7	1.02554	1.0725	0.31585	3	3	0.000253983	0.0191376	0.0191376
tr|A0A1D8PTI1|A0A1D8PTI1_CANAL	Uncharacterized protein	CAALFM_CR07460CA	A0A1D8PTI1	0.979777	8186770	8266800	4088010	3116040	1.00978	0.499343	0.376934	3	3	0.00116875	0.0140654	0.0140654
tr|A0A1D8PDU3|A0A1D8PDU3_CANAL	Ribosomal 40S subunit protein S23B	RPS23A	A0A1D8PDU3	0.987791	3584.33	3644.1	6208.25	1375.53	1.01667	1.73205	0.377468	3	3	2.49085e-05	0.00852295	0.00852295
tr|A0A1D8PMU8|A0A1D8PMU8_CANAL	Importin subunit alpha	orf19.5682	A0A1D8PMU8	0.991844	141458	142457	100123	123590	1.00706	0.707796	0.867559	3	3	6.431e-05	0.00439985	0.00439985
sp|Q59WB3|GAP4_CANAL	S-adenosylmethionine permease GAP4	GAP4	Q59WB3	0.993238	151671	150927	49267.2	134311	0.99509	0.324828	0.889912	3	3	-7.40796e-05	-0.00534405	0.00534405
tr|Q5AAU7|Q5AAU7_CANAL	Translation initiation factor eIF2 subunit alpha	SUI2	Q5AAU7	0.995446	1007930	1011130	231019	884139	1.00318	0.229202	0.874404	3	3	0.000132913	0.00379379	0.00379379
tr|A0A1D8PNN8|A0A1D8PNN8_CANAL	Cam1-1p	CAM1-1	A0A1D8PNN8	0.995862	1984500	1981250	485537	897369	0.998362	0.244665	0.452931	3	3	-9.81815e-05	-0.00265217	0.00265217
sp|Q5AJY5|PGA4_CANAL	1,3-beta-glucanosyltransferase PGA4	PGA4	Q5AJY5	0.99859	1750200	1752310	1453430	1291090	1.00121	0.830434	0.736792	3	3	4.60533e-05	0.00090124	0.00090124
