# Supplementary material for: Heat Shock Protein SSA1 Enriched in Hypoxic Secretome of Candida albicans Exerts an Immunomodulatory Effect via Regulating Macrophage Function
Source: Cells. 2024 Jan 10;13(2):127. doi: 10.3390/cells13020127 (PMC10814802; doi:10.3390/cells13020127)
Supplement: Supplementary file 1 [file cells-13-00127-s001.zip › Table S5.xlsx]

## Sheet: Sheet1
Table S5. Significant differential proteins between Ssa1-treated and untreated BMMs.
					Welch t test
Protein.Group	Protein.Ids	Protein.Names	Genes	First.Protein.Description	estimate.mean in group Control	estimate.mean in group SSA1	p.value	statistic.t	conf.int1	conf.int2	q.value
P27512	P27512	TNR5_MOUSE	Cd40	Tumor necrosis factor receptor superfamily member 5	3.18882	42.7119	1.55947e-08	-16.8129	-44.7779	-34.2682	5.77628e-05
Q01514	Q01514	GBP1_MOUSE	Gbp1	Guanylate-binding protein 1	18.1568	68.3548	4.41812e-08	-19.4857	-56.1281	-44.2679	8.18236e-05
Q64282	Q64282	IFIT1_MOUSE	Ifit1	Interferon-induced protein with tetratricopeptide repeats 1	18.3425	68.266	4.26601e-07	-17.1442	-56.7721	-43.0749	0.00052671
Q8CBB9	Q8CBB9	RSAD2_MOUSE	Rsad2	Radical S-adenosyl methionine domain-containing protein 2	0	47.5573	7.24268e-07	-30.3861	-51.5805	-43.5341	0.000562333
Q3U5Q7	Q3U5Q7	CMPK2_MOUSE	Cmpk2	UMP-CMP kinase 2, mitochondrial	87.543	489.551	7.92487e-07	-16.0744	-461.024	-342.993	0.000562333
Q61107	Q61107	GBP4_MOUSE	Gbp4	Guanylate-binding protein 4	19.2789	74.6449	9.10907e-07	-18.6985	-62.5248	-48.2071	0.000562333
F2Z461	F2Z461	HERC6_MOUSE	Herc6	E3 ISG15--protein ligase Herc6	0	9.17917	3.07598e-06	-22.7127	-10.218	-8.14028	0.00162763
Q9QZ85	Q9QZ85	IIGP1_MOUSE	Iigp1	Interferon-inducible GTPase 1	8.60156	31.6083	3.65059e-06	-9.27362	-28.5496	-17.4638	0.00169022
O54901	O54901	OX2G_MOUSE	Cd200	OX-2 membrane glycoprotein	0.364912	8.68817	4.68461e-06	-11.0817	-10.0622	-6.58431	0.00192798
P01897	P01899;P01897	HA1L_MOUSE	H2-L	H-2 class I histocompatibility antigen, L-D alpha chain	217.562	379.962	5.23987e-06	-8.76753	-203.672	-121.127	0.00194085
Q9D020	Q9D020	5NT3A_MOUSE	Nt5c3a	Cytosolic 5'-nucleotidase 3A	9.82289	26.521	6.39722e-06	-10.2244	-20.4539	-12.9424	0.00198461
Q8K4Q8	Q8K4Q8	COL12_MOUSE	Colec12	Collectin-12	22.4774	8.95278	6.93546e-06	8.49899	9.97862	17.0707	0.00198461
P14430	P14430	HA18_MOUSE	H2-Q8	H-2 class I histocompatibility antigen, Q8 alpha chain	0.88817	12.0711	6.96544e-06	-8.53238	-14.1058	-8.25998	0.00198461
Q8VI94	Q8VI94	OASL1_MOUSE	Oasl1	2'-5'-oligoadenylate synthase-like protein 1	13.6356	65.6792	1.18217e-05	-9.26977	-64.9137	-39.1735	0.00304496
Q91ZX7	Q91ZX7	LRP1_MOUSE	Lrp1	Prolow-density lipoprotein receptor-related protein 1	102.596	77.7899	1.23311e-05	8.00481	17.8933	31.7187	0.00304496
P97742	P97742	CPT1A_MOUSE	Cpt1a	Carnitine O-palmitoyltransferase 1, liver isoform	37.4252	28.7632	1.41227e-05	7.94541	6.22613	11.0978	0.00326941
Q64345	Q64345	IFIT3_MOUSE	Ifit3	Interferon-induced protein with tetratricopeptide repeats 3	22.8233	88.0892	1.67836e-05	-8.20476	-83.2273	-47.3045	0.00363279
P18581	P18581	CTR2_MOUSE	Slc7a2	Cationic amino acid transporter 2	0.832002	12.178	1.7654e-05	-8.0958	-14.5059	-8.18604	0.00363279
Q8BVK9	Q8BVK9	SP110_MOUSE	Sp110	Sp110 nuclear body protein	11.3176	27.0379	2.60024e-05	-8.03344	-20.1698	-11.2708	0.00501501
Q9Z0M9	Q9Z0M9	I18BP_MOUSE	Il18bp	Interleukin-18-binding protein	0	6.86227	2.70789e-05	-14.6159	-8.06918	-5.65537	0.00501501
Q9QYB1	Q9QYB1	CLIC4_MOUSE	Clic4	Chloride intracellular channel protein 4	59.9762	101.831	3.61558e-05	-7.02498	-55.1305	-28.5783	0.00608307
Q9R233	Q9R233	TPSN_MOUSE	Tapbp	Tapasin	165.935	380.832	3.87444e-05	-8.15086	-275.723	-154.072	0.00608307
P06339	P06339	HA15_MOUSE	H2-T23	H-2 class I histocompatibility antigen, D-37 alpha chain	7.20937	29.3477	3.90057e-05	-7.21929	-29.0273	-15.2493	0.00608307
Q6SJQ5	Q6SJQ5	CLM3_MOUSE	Cd300ld3	CMRF35-like molecule 3	17.8676	8.90549	3.94152e-05	6.97548	6.09711	11.827	0.00608307
Q9Z0E6	Q9Z0E6	GBP2_MOUSE	Gbp2	Guanylate-binding protein 2	11.1339	36.5083	4.42669e-05	-6.98835	-33.5001	-17.2487	0.00655859
Q64112	Q64112	IFIT2_MOUSE	Ifit2	Interferon-induced protein with tetratricopeptide repeats 2	25.4879	83.3571	4.67817e-05	-11.0438	-70.8632	-44.8753	0.00666459
Q9R0Q8	Q9R0Q8	CLC4E_MOUSE	Clec4e	C-type lectin domain family 4 member E	0.873447	8.76232	5.22033e-05	-6.78796	-10.4843	-5.29345	0.00706752
P13597	P13597	ICAM1_MOUSE	Icam1	Intercellular adhesion molecule 1	31.871	70.8404	5.34262e-05	-9.35996	-48.9778	-28.9609	0.00706752
Q61543	Q61543	GSLG1_MOUSE	Glg1	Golgi apparatus protein 1	34.5158	22.4968	7.05407e-05	6.52728	7.90928	16.1287	0.00900975
O08529	O08529	CAN2_MOUSE	Capn2	Calpain-2 catalytic subunit	107.346	90.6417	8.25917e-05	6.37265	10.8607	22.5481	0.0101973
P07759	P29621;Q03734;Q5I2A0;P07759;Q80X76;Q91WP6	SPA3K_MOUSE	Serpina3k	Serine protease inhibitor A3K	0.41434	4.24533	8.73873e-05	-6.32848	-5.18053	-2.48144	0.0104414
Q9R062	Q9R062	GLYG_MOUSE	Gyg1	Glycogenin-1	43.7322	54.6531	0.000108388	-6.20298	-14.8525	-6.98931	0.0125459
P21958	P21958	TAP1_MOUSE	Tap1	Antigen peptide transporter 1	20.9465	36.0587	0.000111845	-7.04171	-20.0672	-10.1571	0.0125537
P27773	P27773	PDIA3_MOUSE	Pdia3	Protein disulfide-isomerase A3	427.181	508.18	0.000122868	-7.68256	-105.97	-56.0273	0.0133854
Q8CGE8	Q8CGE8	IFI5A_MOUSE	Ifi205a	Interferon-activable protein 205-A	0	7.49415	0.000136517	-10.4793	-9.33248	-5.65582	0.01419
Q8CFB4	Q8CFB4	GBP5_MOUSE	Gbp5	Guanylate-binding protein 5	9.07334	47.3929	0.000137916	-8.75393	-49.0855	-27.5536	0.01419
Q8BPX9	Q8BPX9	S15A3_MOUSE	Slc15a3	Solute carrier family 15 member 3	4.67278	20.9791	0.000143263	-6.74589	-21.8769	-10.7357	0.0143417
P25085	P25085	IL1RA_MOUSE	Il1rn	Interleukin-1 receptor antagonist protein	22.8574	37.0827	0.000194173	-6.67574	-19.1812	-9.26926	0.0184996
P42082	P42082	CD86_MOUSE	Cd86	T-lymphocyte activation antigen CD86	0	6.15189	0.000194785	-9.73117	-7.77696	-4.52681	0.0184996
O09126	O09126	SEM4D_MOUSE	Sema4d	Semaphorin-4D	0.549283	4.82247	0.000207562	-7.11799	-5.69803	-2.84834	0.0192202
O35613	O35613	DAXX_MOUSE	Daxx	Death domain-associated protein 6	3.3959	19.4144	0.000223897	-5.68878	-22.3169	-9.72006	0.0201379
P21981	P21981	TGM2_MOUSE	Tgm2	Protein-glutamine gamma-glutamyltransferase 2	59.9234	71.7722	0.000228346	-5.60887	-16.5585	-7.13922	0.0201379
Q9CZS1	Q9CZS1	AL1B1_MOUSE	Aldh1b1	Aldehyde dehydrogenase X, mitochondrial	20.6972	26.0017	0.000256487	-5.57119	-7.43223	-3.17664	0.0220936
P08113	P08113	ENPL_MOUSE	Hsp90b1	Endoplasmin	904.794	1006.72	0.00028048	-5.49511	-143.347	-60.4954	0.0235246
P08226	P08226	APOE_MOUSE	Apoe	Apolipoprotein E	192.406	96.8593	0.000288754	6.66139	61.6234	129.471	0.0235246
P11499	P07901;P11499	HS90B_MOUSE	Hsp90ab1	Heat shock protein HSP 90-beta	811.19	928.346	0.000292153	-5.54446	-164.552	-69.7608	0.0235246
Q9EP73	Q9EP73	PD1L1_MOUSE	Cd274	Programmed cell death 1 ligand 1	3.46255	19.9623	0.000299492	-5.78548	-22.9843	-10.0151	0.0236026
P18828	P18828	SDC1_MOUSE	Sdc1	Syndecan-1	2.37574	12.8975	0.000324057	-5.47171	-14.8359	-6.20767	0.0250064
P36371	P36371	TAP2_MOUSE	Tap2	Antigen peptide transporter 2	37.0126	55.9814	0.000341009	-5.39308	-26.8415	-11.0961	0.0257775
P70206	P70206;P70207;P70208;Q80UG2	PLXA1_MOUSE	Plxna1	Plexin-A1	23.9957	34.0449	0.000356468	-5.33683	-14.258	-5.84033	0.0264071
Q99KQ4	Q99KQ4	NAMPT_MOUSE	Nampt	Nicotinamide phosphoribosyltransferase	102.911	125.617	0.000369267	-6.44917	-31.0522	-14.3594	0.0268189
P23249	P23249	MOV10_MOUSE	Mov10	Putative helicase MOV-10	0	9.29034	0.000379174	-8.45877	-12.1136	-6.46705	0.0269007
P18155	P18155	MTDC_MOUSE	Mthfd2	Bifunctional methylenetetrahydrofolate dehydrogenase/cyclohydrolase, mitochondrial	1.54023	11.9744	0.000384918	-5.91865	-14.5151	-6.35337	0.0269007
P54987	P54987	IRG1_MOUSE	Acod1	Cis-aconitate decarboxylase	14.5652	91.4047	0.000394002	-6.46568	-105.126	-48.5531	0.0269245
P09581	P09581	CSF1R_MOUSE	Csf1r	Macrophage colony-stimulating factor 1 receptor	43.7667	15.6121	0.000399797	5.25575	16.1805	40.1287	0.0269245
P11152	P11152	LIPL_MOUSE	Lpl	Lipoprotein lipase	35.6132	13.2258	0.000415513	5.22333	12.81	31.9648	0.0270434
Q810Q5	Q810Q5	NMES1_MOUSE	Nmes1	Normal mucosa of esophagus-specific gene 1 protein	0	13.452	0.000416165	-8.29338	-17.6215	-9.28247	0.0270434
Q9JL16	Q9JL16	ISG20_MOUSE	Isg20	Interferon-stimulated gene 20 kDa protein	1.4861	18.4687	0.000456102	-5.70196	-23.8527	-10.1124	0.0291276
P20029	P20029	BIP_MOUSE	Hspa5	Endoplasmic reticulum chaperone BiP	402.346	512.956	0.0004731	-5.11728	-158.864	-62.3556	0.0297011
A6H5X4	A6H5X4	PHF11_MOUSE	Phf11	PHD finger protein 11	1.9182	13.6467	0.000484076	-5.95204	-16.3488	-7.1081	0.0298836
Q9ET26	Q9ET26	RN114_MOUSE	Rnf114	E3 ubiquitin-protein ligase RNF114	13.082	18.4308	0.000508397	-5.10373	-7.69394	-3.00374	0.0307723
Q8R2Q8	Q8R2Q8	BST2_MOUSE	Bst2	Bone marrow stromal antigen 2	5.94836	26.7377	0.000515087	-5.93203	-29.0242	-12.5544	0.0307723
Q9D0E1	Q9D0E1	HNRPM_MOUSE	Hnrnpm	Heterogeneous nuclear ribonucleoprotein M	150.866	174.278	0.000553021	-5.18134	-33.6111	-13.2116	0.0325141
Q60766	Q60766	IRGM1_MOUSE	Irgm1	Immunity-related GTPase family M protein 1	62.8081	87.5821	0.000595684	-4.99167	-35.8783	-13.6696	0.0344752
Q05769	Q05769	PGH2_MOUSE	Ptgs2	Prostaglandin G/H synthase 2	1.10692	20.9915	0.000699145	-6.15314	-27.7	-12.0693	0.0384193
Q9R0P6	Q9R0P6	SC11A_MOUSE	Sec11a	Signal peptidase complex catalytic subunit SEC11A	23.8818	27.4623	0.000715491	-5.49097	-5.10088	-2.06019	0.0384193
Q8BMF4	Q8BMF4	ODP2_MOUSE	Dlat	Dihydrolipoyllysine-residue acetyltransferase component of pyruvate dehydrogenase complex, mitochondrial	82.6975	98.3202	0.000722306	-5.74769	-22.0613	-9.18404	0.0384193
Q3U1J4	Q3U1J4	DDB1_MOUSE	Ddb1	DNA damage-binding protein 1	30.7536	22.7392	0.000734587	6.18261	4.8651	11.1636	0.0384193
C0HKG5;C0HKG6	C0HKG5;C0HKG6	RNT2A_MOUSE;RNT2B_MOUSE	Rnaset2a;Rnaset2b	Ribonuclease T2-A	2.4023	9.03723	0.000735273	-5.37344	-9.49709	-3.77278	0.0384193
Q99PL6	Q99PL6	UBXN6_MOUSE	Ubxn6	UBX domain-containing protein 6	14.477	10.1327	0.000736346	5.30057	2.45315	6.23544	0.0384193
Q91XB0	Q91XB0	TREX1_MOUSE	Trex1	Three-prime repair exonuclease 1	22.7657	45.811	0.000736438	-5.31084	-33.0646	-13.0261	0.0384193
Q64339	Q64339	ISG15_MOUSE	Isg15	Ubiquitin-like protein ISG15	112.471	411.178	0.00077643	-7.02842	-406.815	-190.599	0.0391201
P05480	Q922K9;Q62190;P16056;P05480;Q62270	SRC_MOUSE	Src	Proto-oncogene tyrosine-protein kinase Src	35.8846	45.6076	0.00077876	-5.36405	-13.9352	-5.51065	0.0391201
Q9WTK5	Q9WTK5	NFKB2_MOUSE	Nfkb2	Nuclear factor NF-kappa-B p100 subunit	26.7186	39.959	0.000781557	-5.89954	-18.6284	-7.85247	0.0391201
P29758	P29758	OAT_MOUSE	Oat	Ornithine aminotransferase, mitochondrial	45.3904	56.1392	0.000795044	-5.10979	-15.5615	-5.93613	0.0392646
Q9D7S7	Q9D7S7	RL22L_MOUSE	Rpl22l1	60S ribosomal protein L22-like 1	27.6921	19.1735	0.000817609	4.78672	4.53334	12.504	0.0398477
Q9QUN7	Q9QUN7	TLR2_MOUSE	Tlr2	Toll-like receptor 2	20.4729	25.2008	0.000832906	-4.87345	-6.91632	-2.53951	0.040066
Q9WTK3	Q9WTK3	GPAA1_MOUSE	Gpaa1	Glycosylphosphatidylinositol anchor attachment 1 protein	22.1744	17.0663	0.000879306	4.88878	2.74177	7.47426	0.0417557
Q9D8B3	Q9D8B3	CHM4B_MOUSE	Chmp4b	Charged multivesicular body protein 4b	88.55	131.179	0.000983602	-6.02881	-59.9819	-25.2755	0.0461172
Q8CFQ3	Q8CFQ3	AQR_MOUSE	Aqr	RNA helicase aquarius	16.3607	12.2181	0.00103274	4.81755	2.18851	6.09676	0.047816
O35892	Q99388;O35892	SP100_MOUSE	Sp100	Nuclear autoantigen Sp-100	20.5234	30.8793	0.00117689	-4.61309	-15.413	-5.29892	0.0535576
Q80UW8	Q80UW8	RPAB1_MOUSE	Polr2e	DNA-directed RNA polymerases I, II, and III subunit RPABC1	21.3614	16.6284	0.00118943	4.53437	2.39544	7.0704	0.0535576
P26883	P26883	FKB1A_MOUSE	Fkbp1a	Peptidyl-prolyl cis-trans isomerase FKBP1A	128.343	151.837	0.00120013	-4.73287	-34.7973	-12.191	0.0535576
Q8R502	Q8R502	LRC8C_MOUSE	Lrrc8c	Volume-regulated anion channel subunit LRRC8C	5.48585	10.0176	0.00123281	-4.76951	-6.70503	-2.35857	0.0537202
Q3UDK1	Q3UDK1	TRAD1_MOUSE	Trafd1	TRAF-type zinc finger domain-containing protein 1	13.2027	33.5972	0.00123785	-4.5315	-30.4934	-10.2957	0.0537202
Q8BUV3	Q8BUV3	GEPH_MOUSE	Gphn	Gephyrin	12.1887	15.5968	0.00124728	-4.90958	-5.01435	-1.80191	0.0537202
Q64281	Q64281	LRB4A_MOUSE	Lilrb4a	Leukocyte immunoglobulin-like receptor subfamily B member 4A	30.0045	39.8354	0.00126229	-4.9242	-14.459	-5.20291	0.0537418
Q8BV66	Q8BV66	IFI44_MOUSE	Ifi44	Interferon-induced protein 44	85.0935	135.513	0.0013163	-5.26906	-73.2326	-27.6073	0.0554044
O89017	O89017	LGMN_MOUSE	Lgmn	Legumain	66.2462	30.4901	0.00136172	5.25837	19.5205	51.9918	0.0566721
O88627	O88627	S28A2_MOUSE	Slc28a2	Sodium/nucleoside cotransporter 2	8.38664	19.7628	0.00138784	-4.3994	-17.1502	-5.60212	0.0571172
Q91Z40	Q91Z40	GBP7_MOUSE	Gbp7	Guanylate-binding protein 7	4.53422	16.9108	0.00149821	-5.21499	-18.0627	-6.69038	0.0609821
Q9D8C4	Q9D8C4	IN35_MOUSE	Ifi35	Interferon-induced 35 kDa protein homolog	12.8667	29.2943	0.00153215	-5.55765	-23.695	-9.15999	0.0616857
Q8BV49	Q8BV49	IFIX_MOUSE	Pyhin1	Pyrin and HIN domain-containing protein 1	12.8788	28.8944	0.00155837	-4.32933	-24.2797	-7.75158	0.0620669
P41233	P41233	ABCA1_MOUSE	Abca1	Phospholipid-transporting ATPase ABCA1	13.3849	7.31001	0.00157779	4.29348	2.92223	9.22749	0.0621717
Q5NBU8	Q5NBU8	XAF1_MOUSE	Xaf1	XIAP-associated factor 1	3.2642	12.3001	0.00167656	-5.59222	-13.0458	-5.02609	0.0647535
Q05915	Q05915	GCH1_MOUSE	Gch1	GTP cyclohydrolase 1	7.07675	25.8424	0.00167828	-5.81894	-26.8927	-10.6387	0.0647535
Q922R8	Q922R8	PDIA6_MOUSE	Pdia6	Protein disulfide-isomerase A6	148.483	171.655	0.00171218	-5.01012	-34.1853	-12.1574	0.064919
Q8BX80	Q8BX80	ENASE_MOUSE	Engase	Cytosolic endo-beta-N-acetylglucosaminidase	17.3926	10.4927	0.00171762	4.57088	3.43273	10.367	0.064919
P32921	P32921	SYWC_MOUSE	Wars1	Tryptophan--tRNA ligase, cytoplasmic	29.0682	40.399	0.00183396	-5.04814	-16.719	-5.94249	0.0686161
Q8BGS7	Q8BGS7	CEPT1_MOUSE	Cept1	Choline/ethanolaminephosphotransferase 1	60.7948	81.4594	0.00186772	-4.26854	-31.5379	-9.79133	0.0687479
P08249	P08249	MDHM_MOUSE	Mdh2	Malate dehydrogenase, mitochondrial	404.496	505.869	0.00190936	-4.22475	-155.112	-47.6337	0.0687479
O35344	O35344	IMA4_MOUSE	Kpna3	Importin subunit alpha-4	32.2136	43.7936	0.00191156	-4.17355	-17.7631	-5.39688	0.0687479
Q9Z2F2	Q9Z2F2	OASL2_MOUSE	Oasl2	2'-5'-oligoadenylate synthase-like protein 2	15.6858	36.8679	0.00191173	-4.59616	-31.8678	-10.4963	0.0687479
P97864	P97864	CASP7_MOUSE	Casp7	Caspase-7	5.19814	14.1044	0.00193394	-4.92451	-13.2221	-4.59048	0.068878
P01902	P01902;P01901	HA1D_MOUSE	H2-K1	H-2 class I histocompatibility antigen, K-D alpha chain	203.345	360.251	0.00201592	-5.75152	-226.408	-87.4045	0.0711141
P28293	P28293	CATG_MOUSE	Ctsg	Cathepsin G	18.598	23.7345	0.00203766	-4.39695	-7.80798	-2.46512	0.071133
Q8BGQ7	Q8BGQ7	SYAC_MOUSE	Aars1	Alanine--tRNA ligase, cytoplasmic	79.381	104.674	0.00205575	-4.18322	-38.8421	-11.7431	0.071133
Q9WU81	Q9WU81	G6PT3_MOUSE	Slc37a2	Glucose-6-phosphate exchanger SLC37A2	140.977	113.252	0.00207407	4.12101	12.7345	42.7153	0.071133
P35991	P35991	BTK_MOUSE	Btk	Tyrosine-protein kinase BTK	20.1268	15.7546	0.00216882	4.14613	2.00964	6.73479	0.0736183
P97372	P97372;P97371	PSME2_MOUSE	Psme2	Proteasome activator complex subunit 2	155.83	215.017	0.00219979	-4.08741	-91.462	-26.9117	0.0736183
P19182	P19182	IFRD1_MOUSE	Ifrd1	Interferon-related developmental regulator 1	2.17079	10.4979	0.00220616	-4.0861	-12.8696	-3.78456	0.0736183
Q52KR3	Q52KR3	PRUN2_MOUSE	Prune2	Protein prune homolog 2	12.6722	9.32795	0.00227924	4.06227	1.50987	5.17854	0.0753778
Q8C708	Q8C708	CP054_MOUSE		Transmembrane protein C16orf54 homolog	0.99472	3.33335	0.00231639	-4.1362	-3.60966	-1.0676	0.0759283
Q6P1B1	Q6P1B1	XPP1_MOUSE	Xpnpep1	Xaa-Pro aminopeptidase 1	31.0703	35.1126	0.00238974	-4.03489	-6.2751	-1.8095	0.0776455
Q6Q899	Q6Q899	DDX58_MOUSE	Ddx58	Antiviral innate immune response receptor RIG-I	34.2725	51.1633	0.00245186	-4.15499	-26.0833	-7.69845	0.0789713
P62141	P62141	PP1B_MOUSE	Ppp1cb	Serine/threonine-protein phosphatase PP1-beta catalytic subunit	36.4339	49.0258	0.00275911	-4.20652	-19.4559	-5.72782	0.0862668
Q8R4Y4	Q8R4Y4	STAB1_MOUSE	Stab1	Stabilin-1	25.6742	6.9521	0.00276588	3.96306	8.1709	29.2733	0.0862668
Q9EPV8	Q9EPV8	UBL5_MOUSE	Ubl5	Ubiquitin-like protein 5	16.2432	10.7066	0.00278672	4.01179	2.43567	8.63746	0.0862668
Q61024	Q61024	ASNS_MOUSE	Asns	Asparagine synthetase [glutamine-hydrolyzing]	20.2377	31.1457	0.00279178	-4.39321	-16.7167	-5.09937	0.0862668
Q8BM55	Q8BM55	TM214_MOUSE	Tmem214	Transmembrane protein 214	25.0312	19.3123	0.00279482	3.96801	2.49577	8.94213	0.0862668
P53690	P53690	MMP14_MOUSE	Mmp14	Matrix metalloproteinase-14	3.38897	14.5977	0.00293272	-3.92669	-17.5843	-4.83319	0.0896713
Q9CXI5	Q9CXI5	MANF_MOUSE	Manf	Mesencephalic astrocyte-derived neurotrophic factor	28.93	37.6507	0.00295354	-4.00903	-13.6275	-3.81389	0.0896713
Q91V61	Q91V61	SFXN3_MOUSE	Sfxn3	Sideroflexin-3	85.3517	73.9702	0.00306018	3.87975	4.84508	17.9178	0.0909813
P07901	P07901	HS90A_MOUSE	Hsp90aa1	Heat shock protein HSP 90-alpha	301.656	356.281	0.00306601	-4.14272	-84.897	-24.3514	0.0909813
Q8R5F7	Q8R5F7	IFIH1_MOUSE	Ifih1	Interferon-induced helicase C domain-containing protein 1	14.4959	30.2825	0.00307037	-4.71627	-23.9306	-7.64274	0.0909813
Q9D115	Q9D115	ZN706_MOUSE	Znf706	Zinc finger protein 706	17.9542	10.6586	0.00313435	3.93583	3.13088	11.4603	0.0912848
Q8R043	Q8R043	SIM29_MOUSE	Smim29	Small integral membrane protein 29	0.679145	2.81959	0.00314393	-3.94373	-3.36128	-0.919612	0.0912848
Q99KF1	Q99KF1	TMED9_MOUSE	Tmed9	Transmembrane emp24 domain-containing protein 9	56.1797	66.3833	0.00317635	-4.31462	-15.7494	-4.65778	0.0912848
Q8BHK6	Q8BHK6	SLAF7_MOUSE	Slamf7	SLAM family member 7	0.85427	17.0227	0.0031792	-4.87877	-24.3792	-7.95773	0.0912848
P0DOV1	Q8CGE8;P0DOV1	IFI5B_MOUSE	Mnda	Interferon-activable protein 205-B	21.0594	44.2144	0.00322357	-4.68637	-35.1948	-11.1152	0.0918469
Q04447	Q04447	KCRB_MOUSE	Ckb	Creatine kinase B-type	1409.68	1687.42	0.00326013	-4.33243	-428.678	-126.795	0.0921795
Q8R4K2	Q8R4K2	IRAK4_MOUSE	Irak4	Interleukin-1 receptor-associated kinase 4	16.0898	12.1386	0.00329432	3.83593	1.65573	6.24671	0.0924407
Q9ER38	Q9ER38	TOR3A_MOUSE	Tor3a	Torsin-3A	34.2494	49.1408	0.0033257	-3.85757	-23.5227	-6.25999	0.0926196
Q3T9E4;Q62293	Q62293;Q3T9E4	TGTP1_MOUSE;TGTP2_MOUSE	Tgtp1;Tgtp2	T-cell-specific guanine nucleotide triphosphate-binding protein 2	8.86961	36.5095	0.00338462	-4.51772	-42.3689	-12.9108	0.0935568
P41216	P41216	ACSL1_MOUSE	Acsl1	Long-chain-fatty-acid--CoA ligase 1	25.9616	62.7273	0.00348316	-5.01514	-55.3162	-18.2152	0.0955677
Q99JF8	Q99JF8	PSIP1_MOUSE	Psip1	PC4 and SFRS1-interacting protein	2.59973	6.75017	0.00352446	-3.85399	-6.56799	-1.73289	0.0959897
P14824	P14824	ANXA6_MOUSE	Anxa6	Annexin A6	189.335	213.084	0.00356324	-3.78802	-37.7208	-9.77719	0.0961746
Q8CBA2	Q8CBA2	SLFN5_MOUSE	Slfn5	Schlafen family member 5	21.7395	29.7425	0.00358318	-4.68911	-12.2039	-3.80193	0.0961746
P63017	P63017	HSP7C_MOUSE	Hspa8	Heat shock cognate 71 kDa protein	918.151	1180.32	0.003647	-4.57306	-401.91	-122.431	0.0971833
P42230	P42230	STA5A_MOUSE	Stat5a	Signal transducer and activator of transcription 5A	5.81377	10.3736	0.00378543	-3.76986	-7.26184	-1.85788	0.100152
Q07113	Q07113	MPRI_MOUSE	Igf2r	Cation-independent mannose-6-phosphate receptor	12.4312	8.48795	0.00384163	3.86235	1.63328	6.25312	0.100918
Q501J6	Q501J6	DDX17_MOUSE	Ddx17	Probable ATP-dependent RNA helicase DDX17	63.6995	70.0674	0.00395041	-4.02503	-10.0271	-2.70872	0.102037
Q3UPF5	Q3UPF5	ZCCHV_MOUSE	Zc3hav1	Zinc finger CCCH-type antiviral protein 1	12.2936	16.2201	0.00395941	-4.16777	-6.14233	-1.7107	0.102037
Q8BUK6	Q8BUK6	HOOK3_MOUSE	Hook3	Protein Hook homolog 3	23.1895	20.4157	0.00396689	3.72838	1.1146	4.433	0.102037
Q02105	Q02105	C1QC_MOUSE	C1qc	Complement C1q subcomponent subunit C	21.5392	7.8112	0.0041341	4.52978	6.2839	21.1721	0.1039
Q9JLI6	Q9JLI6	SCLY_MOUSE	Scly	Selenocysteine lyase	24.2779	31.8506	0.00414618	-4.047	-11.9302	-3.21516	0.1039
Q9QUN3	Q9QUN3	BLNK_MOUSE	Blnk	B-cell linker protein	12.0228	15.0187	0.00419256	-3.71664	-4.79884	-1.19296	0.1039
Q8CAS9	Q8CAS9	PARP9_MOUSE	Parp9	Protein mono-ADP-ribosyltransferase PARP9	21.9645	35.346	0.00419699	-3.69869	-21.4551	-5.30787	0.1039
Q9JIK5	Q9JIK5	DDX21_MOUSE	Ddx21	Nucleolar RNA helicase 2	25.7239	21.5073	0.00421696	3.81975	1.71312	6.72008	0.1039
P16627	P16627	HS71L_MOUSE	Hspa1l	Heat shock 70 kDa protein 1-like	189.676	246.869	0.00423516	-3.698	-91.7286	-22.6574	0.1039
P26041	P26041	MOES_MOUSE	Msn	Moesin	899.352	1114.16	0.00423568	-4.67834	-329.596	-100.012	0.1039
Q99PT1	Q99PT1	GDIR1_MOUSE	Arhgdia	Rho GDP-dissociation inhibitor 1	883.969	1092.74	0.004293	-3.86552	-332.159	-85.3872	0.104614
P40142	Q9D4D4;P40142	TKT_MOUSE	Tkt	Transketolase	448.098	536.649	0.00433344	-3.7137	-142.008	-35.095	0.104909
Q61595	Q61595	KTN1_MOUSE	Ktn1	Kinectin	6.36678	15.7793	0.00439778	-4.34678	-14.66	-4.16496	0.105775
Q9D6N1	Q9D6N1	CAH13_MOUSE	Ca13	Carbonic anhydrase 13	4.66651	12.0808	0.00446679	-3.6637	-11.9322	-2.8964	0.106742
Q05685	Q05685	FOLR2_MOUSE	Folr2	Folate receptor beta	10.3282	14.0351	0.004605	-3.632	-5.98134	-1.43251	0.109339
P63242	P63242;Q8BGY2	IF5A1_MOUSE	Eif5a	Eukaryotic translation initiation factor 5A-1	59.6573	78.7689	0.00467174	-3.73913	-30.6826	-7.54053	0.110217
Q9CXW3	Q9CXW3	CYBP_MOUSE	Cacybp	Calcyclin-binding protein	22.4282	30.5482	0.0047513	-3.66867	-13.0904	-3.14965	0.110981
Q64337	Q64337	SQSTM_MOUSE	Sqstm1	Sequestosome-1	42.8933	270.655	0.00476403	-4.70694	-350.631	-104.892	0.110981
P08103	P08103	HCK_MOUSE	Hck	Tyrosine-protein kinase HCK	59.3274	82.2364	0.00483597	-3.60161	-37.082	-8.7361	0.111953
P62897	P62897	CYC_MOUSE	Cycs	Cytochrome c, somatic	36.2513	46.9812	0.00487135	-3.61593	-17.3592	-4.10058	0.112071
P55065	P55065	PLTP_MOUSE	Pltp	Phospholipid transfer protein	25.3954	15.8532	0.0049562	3.75301	3.74539	15.3391	0.11332
Q922R0	Q922R0	PRKX_MOUSE	Prkx	cAMP-dependent protein kinase catalytic subunit PRKX	2.90259	11.2822	0.00510271	-4.41088	-13.0882	-3.67112	0.115954
Q60668	Q60668	HNRPD_MOUSE	Hnrnpd	Heterogeneous nuclear ribonucleoprotein D0	83.0143	103.035	0.00518742	-3.56176	-32.5504	-7.49202	0.116467
Q6Y7W8	Q6Y7W8	GGYF2_MOUSE	Gigyf2	GRB10-interacting GYF protein 2	15.0071	10.6313	0.00521241	3.9109	1.75891	6.9928	0.116467
P30993	P30993	C5AR1_MOUSE	C5ar1	C5a anaphylatoxin chemotactic receptor 1	33.1303	26.5013	0.00521961	3.77912	2.59656	10.6614	0.116467
P52633	P52633	STAT6_MOUSE	Stat6	Signal transducer and transcription activator 6	23.7744	19.3382	0.00529743	3.60366	1.67065	7.20185	0.117495
Q8K183	Q8K183	PDXK_MOUSE	Pdxk	Pyridoxal kinase	201.418	240.779	0.00577446	-3.79221	-63.497	-15.2243	0.127313
Q9D1A2	Q9D1A2	CNDP2_MOUSE	Cndp2	Cytosolic non-specific dipeptidase	449.161	544.669	0.00603783	-3.50352	-156.577	-34.4403	0.132332
P70158	P70158	ASM3A_MOUSE	Smpdl3a	Acid sphingomyelinase-like phosphodiesterase 3a	19.1401	14.9911	0.00613361	3.70712	1.56165	6.73629	0.133641
P02798	P02798	MT2_MOUSE	Mt2	Metallothionein-2	3.55263	10.1569	0.0062744	-3.66328	-10.7553	-2.45332	0.13532
P28033	P28033	CEBPB_MOUSE	Cebpb	CCAAT/enhancer-binding protein beta	3.50817	13.9586	0.00628377	-4.25931	-16.5665	-4.33442	0.13532
Q9WVL2	Q9WVL2	STAT2_MOUSE	Stat2	Signal transducer and activator of transcription 2	56.8386	79.729	0.00634637	-3.59987	-37.4116	-8.36903	0.135878
P97797	P97797	SHPS1_MOUSE	Sirpa	Tyrosine-protein phosphatase non-receptor type substrate 1	69.5931	54.0426	0.00645063	3.5843	5.64968	25.4513	0.137315
A0A0G2JDV3	A0A0G2JDV3	GBP6_MOUSE	Gbp6	Guanylate-binding protein 6	0	9.8852	0.00648762	-4.48518	-15.5507	-4.21971	0.137315
P34022	P34022	RANG_MOUSE	Ranbp1	Ran-specific GTPase-activating protein	63.8779	72.584	0.00663714	-3.47071	-14.3475	-3.06464	0.138352
Q8R050	Q8R050	ERF3A_MOUSE	Gspt1	Eukaryotic peptide chain release factor GTP-binding subunit ERF3A	32.2287	39.399	0.0066409	-3.47665	-11.8132	-2.5274	0.138352
Q62230	Q62230	SN_MOUSE	Siglec1	Sialoadhesin	39.2178	52.3463	0.00664867	-3.6387	-21.4546	-4.80229	0.138352
P15379	P15379	CD44_MOUSE	Cd44	CD44 antigen	360.104	457.619	0.00677377	-3.72033	-158.849	-36.1795	0.140168
O35375	O35375	NRP2_MOUSE	Nrp2	Neuropilin-2	27.3994	34.1651	0.00687527	-3.43505	-11.1856	-2.34584	0.141478
Q8R5M8	Q8R5M8	CADM1_MOUSE	Cadm1	Cell adhesion molecule 1	26.0426	20.058	0.00705074	3.38817	2.0411	9.92816	0.144236
P61759	P61759	PFD3_MOUSE	Vbp1	Prefoldin subunit 3	42.537	52.4172	0.00708717	-3.48098	-16.3157	-3.44472	0.144236
Q8BHA3	Q8BHA3	DTD2_MOUSE	Dtd2	D-aminoacyl-tRNA deacylase 2	3.02844	8.68924	0.00713371	-3.68924	-9.25499	-2.06661	0.144389
Q3UW53	Q3UW53	NIBA1_MOUSE	Niban1	Protein Niban 1	42.7312	49.3449	0.00717744	-3.41606	-10.9634	-2.26389	0.144485
Q9DB34	Q9DB34	CHM2A_MOUSE	Chmp2a	Charged multivesicular body protein 2a	56.5532	74.8201	0.00726415	-3.51992	-30.1359	-6.39779	0.144961
Q3UIR3	Q3UIR3	DTX3L_MOUSE	Dtx3l	E3 ubiquitin-protein ligase DTX3L	14.2078	26.765	0.00727936	-3.71505	-20.5226	-4.59178	0.144961
P28667	P28667	MRP_MOUSE	Marcksl1	MARCKS-related protein	23.7454	62.0733	0.00747246	-4.02261	-61.8505	-14.8052	0.147535
P02802	P02802	MT1_MOUSE	Mt1	Metallothionein-1	8.59825	25.6488	0.00748827	-3.66056	-27.9726	-6.12857	0.147535
Q8BVE3	Q8BVE3	VATH_MOUSE	Atp6v1h	V-type proton ATPase subunit H	68.9988	84.948	0.0075995	-3.69512	-26.1397	-5.75868	0.148246
Q9R002	Q9R002	IFI2_MOUSE	Ifi202	Interferon-activable protein 202	22.9876	38.5234	0.00760444	-3.87121	-25.258	-5.81364	0.148246
Q8C0M9	Q8C0M9	ASGL1_MOUSE	Asrgl1	Isoaspartyl peptidase/L-asparaginase	1.12904	4.05228	0.00764445	-3.66844	-4.79829	-1.04819	0.148246
Q924M7	Q924M7	MPI_MOUSE	Mpi	Mannose-6-phosphate isomerase	0.453135	1.79999	0.00768493	-3.32938	-2.24892	-0.44479	0.148255
Q922K7	Q922K7	NOP2_MOUSE	Nop2	Probable 28S rRNA (cytosine-C(5))-methyltransferase	11.7527	6.28472	0.00773134	3.85053	2.03115	8.90479	0.148378
Q9CWK8	Q9WV80;Q9CWK8	SNX2_MOUSE	Snx2	Sorting nexin-2	167.279	189.167	0.00778893	-3.6052	-36.0664	-7.71025	0.148712
P05017	P05017	IGF1_MOUSE	Igf1	Insulin-like growth factor I	20.9261	8.22423	0.007868	3.73366	4.59122	20.8125	0.149452
P97369	P97369	NCF4_MOUSE	Ncf4	Neutrophil cytosol factor 4	135	117.749	0.00793334	3.30714	5.62622	28.8771	0.149924
O35350	O35350	CAN1_MOUSE	Capn1	Calpain-1 catalytic subunit	42.7223	36.7628	0.00809172	3.93037	2.22708	9.69205	0.151297
P61027	P61027	RAB10_MOUSE	Rab10	Ras-related protein Rab-10	59.0551	77.7476	0.00813221	-3.68644	-30.7419	-6.64302	0.151297
Q9CQV7	Q9CQV7	TIM14_MOUSE	Dnajc19	Mitochondrial import inner membrane translocase subunit TIM14	8.50645	6.87516	0.00816396	3.30786	0.528855	2.73372	0.151297
Q8R1S4	Q8R1S4	MTSS1_MOUSE	Mtss1	Protein MTSS 1	16.7231	13.8178	0.00816937	3.42642	0.971138	4.83953	0.151297
P10711	P10711	TCEA1_MOUSE	Tcea1	Transcription elongation factor A protein 1	19.8599	27.0443	0.00838555	-3.38956	-12.0033	-2.36564	0.153864
Q3TXU5	Q3TXU5	DHYS_MOUSE	Dhps	Deoxyhypusine synthase	3.34906	9.46273	0.00839106	-3.66602	-10.0788	-2.1485	0.153864
P40124	P40124	CAP1_MOUSE	Cap1	Adenylyl cyclase-associated protein 1	354.318	407.88	0.0085984	-3.33845	-89.8182	-17.3061	0.156889
Q61179	Q61179	IRF9_MOUSE	Irf9	Interferon regulatory factor 9	2.08079	7.40396	0.00870142	-3.87537	-8.70887	-1.93746	0.15799
P05201	P05201	AATC_MOUSE	Got1	Aspartate aminotransferase, cytoplasmic	118.609	135.678	0.00884559	-3.24378	-28.7983	-5.33973	0.159825
Q99NH8	Q99NH8	TREM2_MOUSE	Trem2	Triggering receptor expressed on myeloid cells 2	9.31064	4.70384	0.00897867	3.33754	1.47322	7.74038	0.161442
Q9DCL9	Q9DCL9	PUR6_MOUSE	Paics	Bifunctional phosphoribosylaminoimidazole carboxylase/phosphoribosylaminoimidazole succinocarboxamide synthetase	38.8642	43.8061	0.00908039	-3.9103	-8.09066	-1.7932	0.162482
Q8CFI7	Q8CFI7	RPB2_MOUSE	Polr2b	DNA-directed RNA polymerase II subunit RPB2	14.3591	11.2685	0.00918476	3.22342	0.952667	5.22841	0.163559
Q80YW0	Q80YW0	CYH4_MOUSE	Cyth4	Cytohesin-4	16.771	9.63714	0.00926194	3.21756	2.19088	12.0769	0.164145
Q9JM51	Q9JM51	PTGES_MOUSE	Ptges	Prostaglandin E synthase	4.06012	20.5804	0.00940083	-3.54993	-27.5326	-5.50792	0.164511
Q2EMV9	Q2EMV9	PAR14_MOUSE	Parp14	Protein mono-ADP-ribosyltransferase PARP14	9.19403	17.5357	0.00949271	-3.82775	-13.7368	-2.9465	0.164511
O70252	O70252	HMOX2_MOUSE	Hmox2	Heme oxygenase 2	52.7768	60.1698	0.00950865	-3.23274	-12.5207	-2.2654	0.164511
Q8R420	Q8R420	ABCA3_MOUSE	Abca3	Phospholipid-transporting ATPase ABCA3	19.5925	14.455	0.00955511	3.685	1.7586	8.51636	0.164511
Q922Q1	Q922Q1	MARC2_MOUSE	Mtarc2	Mitochondrial amidoxime reducing component 2	27.7631	23.333	0.00956141	3.30511	1.38303	7.47734	0.164511
Q7TN98	Q7TN98	CPEB4_MOUSE	Cpeb4	Cytoplasmic polyadenylation element-binding protein 4	7.93692	17.9144	0.00959637	-3.74765	-16.4974	-3.45757	0.164511
P61222	P61222	ABCE1_MOUSE	Abce1	ATP-binding cassette sub-family E member 1	17.815	15.0996	0.00962134	3.37915	0.863088	4.56768	0.164511
Q03963	Q03963	E2AK2_MOUSE	Eif2ak2	Interferon-induced, double-stranded RNA-activated protein kinase	19.1468	26.4708	0.00964715	-3.19222	-12.4379	-2.21022	0.164511
Q9QUH0	Q9QUH0	GLRX1_MOUSE	Glrx	Glutaredoxin-1	86.1639	109.256	0.00968236	-3.37831	-38.8582	-7.32652	0.164511
Q99LE1	Q99LE1	RIPL2_MOUSE	Rilpl2	RILP-like protein 2	19.1437	28.0857	0.0097364	-3.87917	-14.7132	-3.1708	0.164674
Q9Z0S9	Q9Z0S9	PRAF1_MOUSE	Rabac1	Prenylated Rab acceptor protein 1	15.8949	19.9713	0.0100597	-3.26123	-6.91193	-1.24087	0.168668
Q91Z38	Q91Z38	TTC1_MOUSE	Ttc1	Tetratricopeptide repeat protein 1	21.5145	26.5921	0.0100636	-3.17535	-8.64731	-1.50799	0.168668
O35593	O35593	PSDE_MOUSE	Psmd14	26S proteasome non-ATPase regulatory subunit 14	45.8472	55.36	0.0103634	-3.14865	-16.245	-2.78059	0.172268
O35955	O35955	PSB10_MOUSE	Psmb10	Proteasome subunit beta type-10	134.099	186.938	0.0104094	-3.71875	-87.8608	-17.8172	0.172268
Q9D0K2	Q9D0K2	SCOT1_MOUSE	Oxct1	Succinyl-CoA:3-ketoacid coenzyme A transferase 1, mitochondrial	109.425	134.478	0.0104179	-3.14567	-42.7997	-7.30572	0.172268
P26350	P26350	PTMA_MOUSE	Ptma	Prothymosin alpha	285.543	192.411	0.0105532	3.14033	27.0175	159.247	0.173414
O89051	O89051	ITM2B_MOUSE	Itm2b	Integral membrane protein 2B	29.797	18.1772	0.0105809	3.21655	3.44469	19.7949	0.173414
O88876	O88876	DHRS3_MOUSE	Dhrs3	Short-chain dehydrogenase/reductase 3	21.3874	14.4213	0.0108049	3.24749	2.07095	11.8613	0.175739
Q99MU3	Q99MU3	DSRAD_MOUSE	Adar	Double-stranded RNA-specific adenosine deaminase	5.6253	15.2312	0.0109167	-3.64554	-16.0662	-3.14566	0.175739
P61226	Q80ZJ1;P61226;Q8BU31	RAP2B_MOUSE	Rap2b	Ras-related protein Rap-2b	75.5922	87.3893	0.0109543	-3.12247	-20.2267	-3.36755	0.175739
Q3U2C5	Q3U2C5	RN149_MOUSE	Rnf149	E3 ubiquitin-protein ligase RNF149	1.2852	3.61393	0.0109838	-3.71986	-3.88375	-0.773703	0.175739
E9Q7G0	E9Q7G0	NUMA1_MOUSE	Numa1	Nuclear mitotic apparatus protein 1	31.8724	26.3641	0.0109994	3.30085	1.65336	9.36328	0.175739
P43883	P43883	PLIN2_MOUSE	Plin2	Perilipin-2	43.4248	63.4118	0.0110074	-3.27976	-34.0106	-5.96334	0.175739
P25119	P25119	TNR1B_MOUSE	Tnfrsf1b	Tumor necrosis factor receptor superfamily member 1B	12.8909	20.0157	0.011286	-3.79907	-11.8618	-2.38781	0.178706
Q8K4M5	Q8K4M5	COMD1_MOUSE	Commd1	COMM domain-containing protein 1	10.0534	7.24133	0.0113309	3.13737	0.798253	4.82583	0.178706
P42232	P42232	STA5B_MOUSE	Stat5b	Signal transducer and activator of transcription 5B	21.7892	24.7341	0.011338	-3.19444	-5.03959	-0.850075	0.178706
Q8R366	Q8R366	IGSF8_MOUSE	Igsf8	Immunoglobulin superfamily member 8	21.0744	32.1546	0.0114648	-3.40865	-18.7808	-3.37966	0.179939
Q9R1P4	Q9R1P4	PSA1_MOUSE	Psma1	Proteasome subunit alpha type-1	143.884	177.433	0.0115307	-3.11682	-57.684	-9.41336	0.180123
Q8R151	Q8R151	ZNFX1_MOUSE	Znfx1	NFX1-type zinc finger-containing protein 1	2.32234	7.93597	0.0115738	-3.72028	-9.3907	-1.83655	0.180123
Q3UDF0	Q3UDF0	GTR6_MOUSE	Slc2a6	Solute carrier family 2, facilitated glucose transporter member 6	6.39137	14.3568	0.0120406	-3.10005	-13.7378	-2.19311	0.186604
P10852	P10852	4F2_MOUSE	Slc3a2	4F2 cell-surface antigen heavy chain	202.669	350.15	0.0121868	-3.71121	-247.58	-47.381	0.188083
O35127	O35127	C10_MOUSE	Grcc10	Protein C10	0.765902	2.64843	0.0125323	-3.1232	-3.24995	-0.515112	0.192522
O08795	O08795	GLU2B_MOUSE	Prkcsh	Glucosidase 2 subunit beta	53.6144	62.6789	0.0126185	-3.1837	-15.6092	-2.5199	0.192522
Q5SSZ5	Q8CGB6;Q5SSZ5	TENS3_MOUSE	Tns3	Tensin-3	19.7567	17.0357	0.0126304	3.54816	0.832587	4.60931	0.192522
Q91VD9	Q91VD9	NDUS1_MOUSE	Ndufs1	NADH-ubiquinone oxidoreductase 75 kDa subunit, mitochondrial	40.2817	35.1796	0.0127722	3.08326	1.36987	8.83419	0.193886
Q91WQ3	Q91WQ3	SYYC_MOUSE	Yars1	Tyrosine--tRNA ligase, cytoplasmic	22.3984	26.0975	0.0128355	-3.19331	-6.37297	-1.02517	0.194051
Q5SSL4	Q5SSL4	ABR_MOUSE	Abr	Active breakpoint cluster region-related protein	33.1513	27.2353	0.0129546	3.16104	1.61872	10.2134	0.195056
Q9D824	Q9D824	FIP1_MOUSE	Fip1l1	Pre-mRNA 3'-end-processing factor FIP1	2.68873	7.06571	0.0130889	-3.35144	-7.49485	-1.2591	0.195974
Q61263	Q61263	SOAT1_MOUSE	Soat1	Sterol O-acyltransferase 1	42.5303	35.8346	0.0131214	3.01617	1.74261	11.6489	0.195974
Q6A0A9	Q6A0A9	F120A_MOUSE	FAM120A	Constitutive coactivator of PPAR-gamma-like protein 1	22.2059	18.1531	0.0132709	3.11696	1.08472	7.02084	0.196764
Q9CQ71	Q9CQ71	RFA3_MOUSE	Rpa3	Replication protein A 14 kDa subunit	1.28651	8.30839	0.0133289	-3.08388	-12.1866	-1.85716	0.196764
Q9CZN7	Q9CZN7	GLYM_MOUSE	Shmt2	Serine hydroxymethyltransferase, mitochondrial	67.9871	81.4567	0.0133337	-3.09215	-23.368	-3.57129	0.196764
P17742	P17742	PPIA_MOUSE	Ppia	Peptidyl-prolyl cis-trans isomerase A	1098	1331.94	0.0138056	-3.02115	-408.027	-59.8412	0.202645
Q9DBT5	Q9DBT5	AMPD2_MOUSE	Ampd2	AMP deaminase 2	11.5171	10.1516	0.0138416	2.9824	0.344477	2.38655	0.202645
Q9Z2I9	Q9Z2I9	SUCB1_MOUSE	Sucla2	Succinate--CoA ligase [ADP-forming] subunit beta, mitochondrial	52.2214	59.136	0.0138998	-3.16371	-11.9842	-1.84489	0.202696
P38647	P38647	GRP75_MOUSE	Hspa9	Stress-70 protein, mitochondrial	171.02	198.017	0.014105	-3.01418	-47.1602	-6.83276	0.204881
Q9JL35	Q9JL35	HMGN5_MOUSE	Hmgn5	High mobility group nucleosome-binding domain-containing protein 5	8.43047	18.4095	0.0142498	-3.13468	-17.3443	-2.6137	0.206177
Q8BVW3	Q8BVW3	TRI14_MOUSE	Trim14	Tripartite motif-containing protein 14	48.4755	57.8626	0.0143496	-2.96633	-16.4523	-2.322	0.206813
Q9WVA4	Q9WVA4	TAGL2_MOUSE	Tagln2	Transgelin-2	489.085	566.784	0.0145383	-2.96207	-136.307	-19.09	0.208721
Q91ZW3	Q91ZW3;Q6PGB8	SMCA5_MOUSE	Smarca5	SWI/SNF-related matrix-associated actin-dependent regulator of chromatin subfamily A member 5	18.5453	15.2762	0.0149599	2.9383	0.78716	5.75091	0.21318
P62827	P62827	RAN_MOUSE	Ran	GTP-binding nuclear protein Ran	151.787	169.659	0.0150113	-3.01126	-31.3396	-4.40537	0.21318
P29452	P29452	CASP1_MOUSE	Casp1	Caspase-1	46.7965	60.2245	0.0150216	-3.30156	-23.2432	-3.61281	0.21318
Q9CVD2	Q9CVD2	ATX3_MOUSE	Atxn3	Ataxin-3	11.2745	8.81541	0.0151289	2.94134	0.589907	4.3282	0.213884
Q62192	Q62192	CD180_MOUSE	Cd180	CD180 antigen	29.9126	39.1148	0.0152651	-3.0129	-16.1512	-2.25314	0.2147
Q8VE88	Q8VE88	F1142_MOUSE	Fam114a2	Protein FAM114A2	5.43362	13.9932	0.0153026	-3.35738	-14.7995	-2.31969	0.2147
Q9D3G5	Q9D3G5	STX11_MOUSE	Stx11	Syntaxin-11	5.59086	12.174	0.0154186	-3.28745	-11.4216	-1.7446	0.215511
Q922J9	Q922J9	FACR1_MOUSE	Far1	Fatty acyl-CoA reductase 1	12.991	10.7444	0.0155145	3.11757	0.564848	3.92848	0.21555
Q9QYS9	Q9QYS9	QKI_MOUSE	Qki	Protein quaking	51.6283	45.4575	0.0155565	3.33236	1.64919	10.6923	0.21555
Q9WU28	Q9WU28	PFD5_MOUSE	Pfdn5	Prefoldin subunit 5	1.99079	5.32784	0.015596	-2.94517	-5.88315	-0.790958	0.21555
A3KGB4	A3KGB4	TBC8B_MOUSE	Tbc1d8b	TBC1 domain family member 8B	4.31814	8.17638	0.0157581	-2.95649	-6.80267	-0.913812	0.216256
Q7TPV4	Q7TPV4	MBB1A_MOUSE	Mybbp1a	Myb-binding protein 1A	115.008	90.6571	0.0157932	2.91874	5.68613	43.0167	0.216256
P18760	P45591;P18760	COF1_MOUSE	Cfl1	Cofilin-1	952.418	1133.62	0.0158222	-3.08372	-317.718	-44.6796	0.216256
Q9Z0M5	Q9Z0M5	LICH_MOUSE	Lipa	Lysosomal acid lipase/cholesteryl ester hydrolase	42.766	29.8877	0.0160379	2.89771	2.96354	22.7931	0.21766
Q9CYL5	Q9CYL5	GAPR1_MOUSE	Glipr2	Golgi-associated plant pathogenesis-related protein 1	4.02692	8.94606	0.0160489	-3.35689	-8.53333	-1.30494	0.21766
Q9D898	Q9D898	ARP5L_MOUSE	Arpc5l	Actin-related protein 2/3 complex subunit 5-like protein	29.226	35.6609	0.0161012	-2.89839	-11.3915	-1.47845	0.21766
P14106	P14106	C1QB_MOUSE	C1qb	Complement C1q subcomponent subunit B	12.1137	4.62018	0.0163969	2.96645	1.74821	13.2389	0.220851
Q9D051	Q9D051	ODPB_MOUSE	Pdhb	Pyruvate dehydrogenase E1 component subunit beta, mitochondrial	52.795	58.8123	0.0165553	-2.87928	-10.6798	-1.35484	0.221614
Q60960	Q60960	IMA5_MOUSE	Kpna1	Importin subunit alpha-5	22.2455	18.4343	0.0165732	3.12273	0.930855	6.69161	0.221614
P09671	P09671	SODM_MOUSE	Sod2	Superoxide dismutase [Mn], mitochondrial	77.3861	120.922	0.0166891	-3.15562	-76.3675	-10.7048	0.221977
P68134	P68134;P68033	ACTS_MOUSE	Acta1	Actin, alpha skeletal muscle	15371.3	17845.3	0.0168082	-3.06332	-4359.12	-588.946	0.221977
Q9DCT2	Q9DCT2	NDUS3_MOUSE	Ndufs3	NADH dehydrogenase [ubiquinone] iron-sulfur protein 3, mitochondrial	59.089	51.1793	0.0168166	2.93991	1.80599	14.0134	0.221977
P42208	P42208	SEPT2_MOUSE	Septin2	Septin-2	59.2613	69.0237	0.01684	-2.87068	-17.3519	-2.17282	0.221977
Q03265	Q03265	ATPA_MOUSE	Atp5f1a	ATP synthase subunit alpha, mitochondrial	502.826	534.775	0.0170707	-2.87747	-56.8182	-7.0801	0.222168
O08749	O08749	DLDH_MOUSE	Dld	Dihydrolipoyl dehydrogenase, mitochondrial	187.344	222.034	0.017078	-2.85844	-61.747	-7.63202	0.222168
P23492	P23492	PNPH_MOUSE	Pnp	Purine nucleoside phosphorylase	271.778	426.801	0.0171174	-3.14878	-272.485	-37.5625	0.222168
O88428	O88428	PAPS2_MOUSE	Papss2	Bifunctional 3'-phosphoadenosine 5'-phosphosulfate synthase 2	3.79225	9.88989	0.0171477	-3.40636	-10.6078	-1.58749	0.222168
Q8BVM9	Q8BVM9	PH11A_MOUSE	Phf11a	PHD finger protein 11A	0	2.15179	0.017202	-3.50447	-3.73016	-0.573418	0.222168
Q9JL56	Q9JL56	GDE1_MOUSE	Gde1	Glycerophosphodiester phosphodiesterase 1	6.24742	13.3573	0.0172472	-2.90916	-12.6343	-1.58539	0.222168
Q8VDG5	Q8VDG5	PPCS_MOUSE	Ppcs	Phosphopantothenate--cysteine ligase	2.60768	8.23653	0.0172744	-3.12363	-9.91061	-1.34709	0.222168
Q9JHK5	Q9JHK5	PLEK_MOUSE	Plek	Pleckstrin	189.209	220.307	0.0174815	-3.15309	-54.7329	-7.46409	0.22291
P21279	P21279	GNAQ_MOUSE	Gnaq	Guanine nucleotide-binding protein G(q) subunit alpha	49.59	43.5306	0.0174989	2.86577	1.32	10.7986	0.22291
Q62191	Q62191	RO52_MOUSE	Trim21	E3 ubiquitin-protein ligase TRIM21	8.9115	15.7797	0.0175452	-2.85183	-12.2501	-1.48644	0.22291
Q9CQU0	Q9CQU0	TXD12_MOUSE	Txndc12	Thioredoxin domain-containing protein 12	47.2522	58.7715	0.0175728	-2.84488	-20.5541	-2.48449	0.22291
Q62418	Q62418	DBNL_MOUSE	Dbnl	Drebrin-like protein	56.4908	69.4926	0.0177728	-3.06374	-22.9957	-3.00798	0.224677
O35286	O35286;A2A4P0	DHX15_MOUSE	Dhx15	ATP-dependent RNA helicase DHX15	38.647	33.9035	0.0178939	3.16164	1.12746	8.35948	0.225438
Q3UJD6	Q3UJD6	UBP19_MOUSE	Usp19	Ubiquitin carboxyl-terminal hydrolase 19	8.92189	7.94865	0.0180225	2.84099	0.206767	1.73972	0.226289
Q99MD9	Q99MD9	NASP_MOUSE	Nasp	Nuclear autoantigenic sperm protein	12.6953	15.1434	0.0182318	-2.92505	-4.36323	-0.532904	0.228143
Q9R0M6	Q9R0M6;Q8BHH2	RAB9A_MOUSE	Rab9a	Ras-related protein Rab-9A	34.2959	41.3164	0.0185217	-2.8433	-12.5708	-1.47012	0.230992
B2RXS4	B2RXS4	PLXB2_MOUSE	Plxnb2	Plexin-B2	38.9281	35.6644	0.0186438	2.84724	0.681869	5.84553	0.231733
Q62351	Q62351	TFR1_MOUSE	Tfrc	Transferrin receptor protein 1	78.2861	43.0346	0.0188077	3.13278	8.0769	62.426	0.232989
P28740	P28740	KIF2A_MOUSE	Kif2a	Kinesin-like protein KIF2A	11.2378	9.23241	0.019066	3.06535	0.446179	3.56457	0.234209
Q62086	Q62086	PON2_MOUSE	Pon2	Serum paraoxonase/arylesterase 2	17.0796	21.4653	0.0191361	-2.9622	-7.83081	-0.940552	0.234209
Q9D868	Q9D868	PPIH_MOUSE	Ppih	Peptidyl-prolyl cis-trans isomerase H	36.4716	45.5114	0.019149	-2.86428	-16.2085	-1.87098	0.234209
Q9JHQ5	Q9JHQ5	LZTL1_MOUSE	Lztfl1	Leucine zipper transcription factor-like protein 1	3.65728	9.29242	0.0191591	-3.16736	-9.97949	-1.29078	0.234209
P57759	P57759	ERP29_MOUSE	Erp29	Endoplasmic reticulum resident protein 29	116.759	148.119	0.0194671	-2.77951	-56.498	-6.22074	0.237192
P0C7N9	P0C7N9	PSMG4_MOUSE	Psmg4	Proteasome assembly chaperone 4	9.96318	5.34297	0.0195564	3.06027	1.01061	8.22982	0.237498
O88587	O88587	COMT_MOUSE	Comt	Catechol O-methyltransferase	43.9309	38.9028	0.0197373	2.78888	0.992525	9.06368	0.238912
Q01405	Q01405	SC23A_MOUSE	Sec23a	Protein transport protein Sec23A	18.6011	16.1059	0.0199443	2.76588	0.484854	4.50551	0.240571
B2RQC6	B2RQC6	PYR1_MOUSE	Cad	CAD protein	15.1923	12.4943	0.0200043	2.98459	0.5673	4.82877	0.240571
P63101	P63101	1433Z_MOUSE	Ywhaz	14-3-3 protein zeta/delta	640.977	704.694	0.0201416	-2.76407	-115.14	-12.2937	0.240613
P63213	P63213	GBG2_MOUSE	Gng2	Guanine nucleotide-binding protein G(I)/G(S)/G(O) subunit gamma-2	38.2005	27.359	0.020169	2.9906	2.27222	19.4109	0.240613
Q921J2	Q921J2	RHEB_MOUSE	Rheb	GTP-binding protein Rheb	27.5432	34.7349	0.0202027	-2.97108	-12.8879	-1.49559	0.240613
Q9D2Y4	Q9D2Y4	MLKL_MOUSE	Mlkl	Mixed lineage kinase domain-like protein	4.60543	9.51416	0.020363	-3.09476	-8.75933	-1.05813	0.241745
P47856	P47856	GFPT1_MOUSE	Gfpt1	Glutamine--fructose-6-phosphate aminotransferase [isomerizing] 1	17.4564	21.925	0.0206007	-3.18258	-7.95495	-0.982281	0.243786
Q99LD4	Q99LD4	CSN1_MOUSE	Gps1	COP9 signalosome complex subunit 1	29.4046	25.0499	0.0207016	3.02184	0.906573	7.80279	0.2442
Q60787	Q60787	LCP2_MOUSE	Lcp2	Lymphocyte cytosolic protein 2	5.26002	12.9313	0.0208498	-3.02482	-13.7516	-1.59088	0.245167
P70290	P70290	EM55_MOUSE	Mpp1	55 kDa erythrocyte membrane protein	75.7882	84.0096	0.0210788	-2.73528	-14.9223	-1.52043	0.246346
Q8R2K1	Q8R2K1	FUCM_MOUSE	Fuom	Fucose mutarotase	2.87957	7.22517	0.0210831	-2.89525	-7.83647	-0.854733	0.246346
Q9R099	Q9R099	TBL2_MOUSE	Tbl2	Transducin beta-like protein 2	1.94436	4.85673	0.0211799	-2.8463	-5.26403	-0.560714	0.246699
P97379	P97379	G3BP2_MOUSE	G3bp2	Ras GTPase-activating protein-binding protein 2	35.3505	43.5444	0.0212505	-2.82536	-14.8265	-1.56136	0.246746
Q9Z2U0	Q9Z2U0	PSA7_MOUSE	Psma7	Proteasome subunit alpha type-7	122.927	137.548	0.0215765	-2.73918	-26.5786	-2.66339	0.24899
Q9QXD8	Q9QXD8	LIMD1_MOUSE	Limd1	LIM domain-containing protein 1	2.77797	6.91757	0.0215782	-3.19702	-7.39424	-0.884973	0.24899
Q91WD5	Q91WD5	NDUS2_MOUSE	Ndufs2	NADH dehydrogenase [ubiquinone] iron-sulfur protein 2, mitochondrial	30.7074	23.5675	0.0217181	3.00743	1.43012	12.8497	0.249757
P49722	P49722	PSA2_MOUSE	Psma2	Proteasome subunit alpha type-2	146.56	180.913	0.0218392	-2.78055	-62.3998	-6.30622	0.249757
P56528	P56528	CD38_MOUSE	Cd38	ADP-ribosyl cyclase/cyclic ADP-ribose hydrolase 1	0	11.4925	0.021895	-3.28246	-20.4927	-2.49243	0.249757
Q9WVC3	Q9WVC3	CAV2_MOUSE	Cav2	Caveolin-2	11.5075	3.41244	0.0219145	2.802	1.49476	14.6954	0.249757
P43346	P43346	DCK_MOUSE	Dck	Deoxycytidine kinase	3.31212	12.319	0.0220158	-2.86343	-16.3171	-1.69672	0.250143
Q60963	Q60963	PAFA_MOUSE	Pla2g7	Platelet-activating factor acetylhydrolase	25.0131	18.9161	0.0221689	2.74982	1.09312	11.1009	0.251112
Q9QXA5	Q9QXA5	LSM4_MOUSE	Lsm4	U6 snRNA-associated Sm-like protein LSm4	41.5923	28.6189	0.0224054	2.74745	2.30479	23.642	0.253017
Q8WTY4	Q8WTY4	CPIN1_MOUSE	Ciapin1	Anamorsin	7.51756	12.6788	0.0227207	-2.94363	-9.34543	-0.976958	0.255798
Q99KR3	Q99KR3	LACB2_MOUSE	Lactb2	Endoribonuclease LACTB2	31.4205	43.6192	0.0228527	-2.68957	-22.3146	-2.08281	0.256505
Q9CQ43	Q9CQ43	DUT_MOUSE	Dut	Deoxyuridine 5'-triphosphate nucleotidohydrolase	1.94113	5.90625	0.0229367	-3.14311	-7.13431	-0.795938	0.25667
Q9D8M3	Q9D8M3	HRG1_MOUSE	Slc48a1	Heme transporter HRG1	1.13388	2.76507	0.0230798	-3.13746	-2.93717	-0.325221	0.25668
Q9WVK4	Q9QXY6;Q9WVK4	EHD1_MOUSE	Ehd1	EH domain-containing protein 1	99.0109	128.783	0.0230902	-3.15924	-53.5702	-5.97396	0.25668
P46471	P46471	PRS7_MOUSE	Psmc2	26S proteasome regulatory subunit 7	75.21	86.8074	0.0231455	-2.80136	-21.1438	-2.051	0.25668
Q9D6M3	Q9D6M3	GHC1_MOUSE	Slc25a22	Mitochondrial glutamate carrier 1	22.696	25.9469	0.0232318	-2.7588	-5.93832	-0.563551	0.256867
Q9DBU3	Q9DBU3	RIOK3_MOUSE	Riok3	Serine/threonine-protein kinase RIO3	3.7705	11.7239	0.0233496	-3.11288	-14.3483	-1.55853	0.257372
Q9BDB7	Q9BDB7	IF44L_MOUSE	Ifi44l	Interferon-induced protein 44-like	131.565	165.997	0.0234264	-3.10976	-62.1418	-6.72205	0.257372
Q9ESY9	Q9ESY9	GILT_MOUSE	Ifi30	Gamma-interferon-inducible lysosomal thiol reductase	26.1106	15.6163	0.0234859	2.83863	1.86004	19.1286	0.257372
Q05816	Q05816	FABP5_MOUSE	Fabp5	Fatty acid-binding protein 5	818.221	1002.94	0.0235716	-2.68964	-338.698	-30.739	0.25755
P20934	P20934	EVI2A_MOUSE	Evi2a	Protein EVI2A	3.43866	9.61715	0.0240031	-2.66115	-11.3572	-0.99978	0.260571
Q9DCW4	Q9DCW4	ETFB_MOUSE	Etfb	Electron transfer flavoprotein subunit beta	78.7714	84.8757	0.0241021	-2.70447	-11.206	-1.00256	0.260571
Q8BFY9	Q8BFY9	TNPO1_MOUSE	Tnpo1	Transportin-1	24.2678	20.8533	0.0241061	2.75634	0.572851	6.25628	0.260571
Q91YU8	Q91YU8	SSF1_MOUSE	Ppan	Suppressor of SWI4 1 homolog	1.0616	3.24252	0.024153	-2.74019	-3.99898	-0.362858	0.260571
Q91WJ8	Q91WJ8	FUBP1_MOUSE	Fubp1	Far upstream element-binding protein 1	42.0918	47.6549	0.0242235	-2.67658	-10.2273	-0.89886	0.260571
P10126	P10126	EF1A1_MOUSE	Eef1a1	Elongation factor 1-alpha 1	856.083	999.481	0.0242702	-2.76147	-262.833	-23.9613	0.260571
P70444	P70444	BID_MOUSE	Bid	BH3-interacting domain death agonist	14.5172	19.8496	0.0244308	-2.96385	-9.70901	-0.955857	0.261536
Q9JM52	Q9JM52	MINK1_MOUSE	Mink1	Misshapen-like kinase 1	24.1548	18.0616	0.024637	2.97689	1.08881	11.0976	0.262494
Q920A5	Q920A5	RISC_MOUSE	Scpep1	Retinoid-inducible serine carboxypeptidase	64.0998	72.4738	0.0246619	-2.64913	-15.4329	-1.31526	0.262494
Q99PV0	Q99PV0	PRP8_MOUSE	Prpf8	Pre-mRNA-processing-splicing factor 8	48.9312	43.8799	0.0249939	2.63594	0.778886	9.32371	0.265265
P14901	P14901	HMOX1_MOUSE	Hmox1	Heme oxygenase 1	287.146	650.569	0.0252112	-3.09528	-660.725	-66.1204	0.266807
Q61792	Q61792	LASP1_MOUSE	Lasp1	LIM and SH3 domain protein 1	255.916	293.091	0.0256872	-2.63528	-68.7709	-5.57848	0.270676
Q3UDE2	Q3UDE2	TTL12_MOUSE	Ttll12	Tubulin--tyrosine ligase-like protein 12	12.7114	15.0798	0.025723	-2.64999	-4.37949	-0.35721	0.270676
Q9WTV6	Q9WTV6	UBP18_MOUSE	Usp18	Ubl carboxyl-terminal hydrolase 18	0	1.03353	0.0261089	-3.12485	-1.88373	-0.18332	0.273578
P48410	P48410	ABCD1_MOUSE	Abcd1	ATP-binding cassette sub-family D member 1	28.047	19.161	0.0262177	2.86996	1.43704	16.3349	0.273578
Q9Z204	Q9Z204	HNRPC_MOUSE	Hnrnpc	Heterogeneous nuclear ribonucleoproteins C1/C2	125.799	142.016	0.0262203	-2.62637	-30.06	-2.37302	0.273578
P48722	P48722	HS74L_MOUSE	Hspa4l	Heat shock 70 kDa protein 4L	16.1248	26.0819	0.0264019	-2.9389	-18.2747	-1.63938	0.274698
Q8K4Q7	Q8K4Q7	CERK1_MOUSE	Cerk	Ceramide kinase	17.0016	12.244	0.0265328	2.75123	0.725167	8.79003	0.275287
P26443	P26443	DHE3_MOUSE	Glud1	Glutamate dehydrogenase 1, mitochondrial	140.599	153.081	0.0266901	-2.79763	-23.038	-1.92599	0.276146
Q9JKM7	Q9JKM7	RAB37_MOUSE	Rab37	Ras-related protein Rab-37	7.85076	16.7342	0.0268602	-2.62733	-16.4998	-1.26706	0.277132
P35486	P35486	ODPA_MOUSE	Pdha1	Pyruvate dehydrogenase E1 component subunit alpha, somatic form, mitochondrial	102.634	113.76	0.0270433	-2.72256	-20.6099	-1.64106	0.278246
Q00422	Q00422	GABPA_MOUSE	Gabpa	GA-binding protein alpha chain	0.695878	2.06071	0.0272618	-2.71573	-2.53073	-0.198923	0.27918
P35922	P35922	FMR1_MOUSE	Fmr1	Synaptic functional regulator FMR1	6.78938	9.04669	0.0273554	-2.60832	-4.20193	-0.312688	0.27918
P50543	P50543	S10AB_MOUSE	S100a11	Protein S100-A11	14.6227	28.8995	0.0274954	-2.59829	-26.5966	-1.957	0.27918
Q9QXS1	Q9QXS1	PLEC_MOUSE	Plec	Plectin	58.0513	53.4253	0.0275162	2.8282	0.698024	8.55394	0.27918
O55126	O55126	NIPS2_MOUSE	Nipsnap2	Protein NipSnap homolog 2	83.2054	96.1072	0.0275846	-2.60855	-24.0336	-1.77011	0.27918
Q5BLK4	Q5BLK4	TUT7_MOUSE	Tut7	Terminal uridylyltransferase 7	2.45435	5.97302	0.027636	-2.71537	-6.53263	-0.504726	0.27918
Q6P4T2	Q6P4T2	U520_MOUSE	Snrnp200	U5 small nuclear ribonucleoprotein 200 kDa helicase	22.8743	21.1865	0.0276617	2.58552	0.228372	3.14716	0.27918
P05202	P05202	AATM_MOUSE	Got2	Aspartate aminotransferase, mitochondrial	190.102	219.976	0.0278167	-2.57216	-55.7568	-3.99053	0.279374
Q921H9	Q921H9	COA7_MOUSE	Coa7	Cytochrome c oxidase assembly factor 7	0	3.12828	0.0278318	-3.06848	-5.74896	-0.507605	0.279374
Q921G6	Q921G6	LRCH4_MOUSE	Lrch4	Leucine-rich repeat and calponin homology domain-containing protein 4	23.5137	19.9033	0.028039	2.85068	0.537363	6.68337	0.280693
Q3UGC7;Q66JS6	Q66JS6;Q3UGC7	EI3JA_MOUSE;EI3JB_MOUSE	Eif3j1;Eif3j2	Eukaryotic translation initiation factor 3 subunit J-A	0	5.5496	0.0281749	-3.05773	-10.2151	-0.884143	0.281293
P47753	P47753	CAZA1_MOUSE	Capza1	F-actin-capping protein subunit alpha-1	189.805	219.973	0.0283502	-2.58115	-56.382	-3.95372	0.282283
P70343	P70343	CASP4_MOUSE	Casp4	Caspase-4	0	5.21073	0.02855	-3.04613	-9.60797	-0.813481	0.282936
P35456	P35456	UPAR_MOUSE	Plaur	Urokinase plasminogen activator surface receptor	3.30313	7.78603	0.0285686	-2.89547	-8.30276	-0.663034	0.282936
Q9JKR6	Q9JKR6	HYOU1_MOUSE	Hyou1	Hypoxia up-regulated protein 1	64.9544	72.6119	0.0286869	-2.62131	-14.3081	-1.00703	0.283289
Q3UM45	Q3UM45	PP1R7_MOUSE	Ppp1r7	Protein phosphatase 1 regulatory subunit 7	27.6157	30.7688	0.0288287	-2.55071	-5.90741	-0.398752	0.283289
Q61093	Q61093	CY24B_MOUSE	Cybb	Cytochrome b-245 heavy chain	64.6474	77.7813	0.0288911	-2.56545	-24.5999	-1.66789	0.283289
Q61072	Q61072	ADAM9_MOUSE	Adam9	Disintegrin and metalloproteinase domain-containing protein 9	0	1.07002	0.0289595	-3.03367	-1.9767	-0.163339	0.283289
Q64277	Q64277	BST1_MOUSE	Bst1	ADP-ribosyl cyclase/cyclic ADP-ribose hydrolase 2	4.8803	11.7196	0.0290279	-2.64556	-12.7833	-0.895346	0.283289
P01887	P01887	B2MG_MOUSE	B2m	Beta-2-microglobulin	641.841	995.626	0.0290631	-2.73466	-659.525	-48.0441	0.283289
P39054	Q8BZ98;P39054	DYN2_MOUSE	Dnm2	Dynamin-2	62.463	66.0627	0.0291515	-2.55962	-6.749	-0.450504	0.283405
P42225	P42225	STAT1_MOUSE	Stat1	Signal transducer and activator of transcription 1	60.226	105.749	0.029568	-2.87147	-84.6688	-6.37686	0.286701
Q9R190	Q9R190	MTA2_MOUSE	Mta2	Metastasis-associated protein MTA2	38.5466	33.5421	0.0298644	2.56139	0.606339	9.40273	0.288819
Q5SVR0	Q5SVR0	TBC9B_MOUSE	Tbc1d9b	TBC1 domain family member 9B	1.63443	3.95748	0.0301141	-2.60147	-4.36273	-0.283367	0.290374
Q99MS7	Q99MS7	EH1L1_MOUSE	Ehbp1l1	EH domain-binding protein 1-like protein 1	21.1991	16.2283	0.0301819	2.75988	0.647344	9.29432	0.290374
Q9Z218	Q9Z218	DPP6_MOUSE	Dpp6	Dipeptidyl aminopeptidase-like protein 6	10.953	28.4361	0.0304137	-2.64083	-32.8265	-2.13971	0.291845
Q8BTX9	Q8BTX9	HSDL1_MOUSE	Hsdl1	Inactive hydroxysteroid dehydrogenase-like protein 1	14.0055	11.3623	0.0306293	2.60939	0.315585	4.9709	0.293155
O88342	O88342	WDR1_MOUSE	Wdr1	WD repeat-containing protein 1	354.046	400.229	0.0309029	-2.52209	-87.1471	-5.21958	0.29456
Q4JIM5	Q4JIM5	ABL2_MOUSE	Abl2	Tyrosine-protein kinase ABL2	0	1.41498	0.0309842	-2.97483	-2.63769	-0.19228	0.29456
Q8BVI5	Q8BVI5	STX16_MOUSE	Stx16	Syntaxin-16	2.3177	5.58094	0.0311075	-2.82959	-6.10896	-0.417525	0.29456
Q60710	Q60710	SAMH1_MOUSE	Samhd1	Deoxynucleoside triphosphate triphosphohydrolase SAMHD1	332.336	414.019	0.0311823	-2.8986	-152.678	-10.6897	0.29456
P21460	P21460	CYTC_MOUSE	Cst3	Cystatin-C	60.3501	43.5545	0.031246	2.63593	1.96777	31.6234	0.29456
Q9CRY7	Q9CRY7	GDPD1_MOUSE	Gdpd1	Lysophospholipase D GDPD1	23.4161	21.0436	0.0313186	2.52285	0.26264	4.48223	0.29456
Q00899	Q00899;Q3TTC2;P22227	TYY1_MOUSE	Yy1	Transcriptional repressor protein YY1	8.84243	6.47469	0.0313328	2.51502	0.260926	4.47455	0.29456
Q8C1B7	Q9R1T4;Q8CHH9;Q8C1B7	SEP11_MOUSE	Septin11	Septin-11	89.8196	98.8082	0.031439	-2.53087	-16.9843	-0.99281	0.29481
Q9JMH9	Q9JMH9	MY18A_MOUSE	Myo18a	Unconventional myosin-XVIIIa	19.6102	16.0166	0.0315254	2.72335	0.431109	6.75602	0.294874
Q91W52	Q91W52	TMM19_MOUSE	Tmem19	Transmembrane protein 19	26.8479	22.1285	0.0316698	2.59887	0.531926	8.90687	0.295479
Q9CZ30	Q9CZ30	OLA1_MOUSE	Ola1	Obg-like ATPase 1	35.1825	38.9755	0.0317987	-2.49957	-7.18118	-0.40489	0.295587
Q9ERS5	Q9ERS5	PKHA2_MOUSE	Plekha2	Pleckstrin homology domain-containing family A member 2	12.0913	28.117	0.0318544	-2.84558	-30.0659	-1.98552	0.295587
Q99LC5	Q99LC5	ETFA_MOUSE	Etfa	Electron transfer flavoprotein subunit alpha, mitochondrial	86.6362	95.3999	0.031929	-2.61104	-16.5475	-0.979869	0.295587
P11680	P11680	PROP_MOUSE	Cfp	Properdin	14.1713	6.99272	0.0320006	2.49088	0.75485	13.6023	0.295587
Q9CX13	Q9CX13	CNIH4_MOUSE	Cnih4	Protein cornichon homolog 4	6.52385	15.2016	0.0320935	-2.7468	-16.335	-1.02043	0.295707
Q8BFZ3	Q8BFZ3	ACTBL_MOUSE	Actbl2	Beta-actin-like protein 2	1739.62	2196.02	0.0325607	-2.69088	-861.681	-51.1061	0.299268
Q9JHF7	Q9JHF7	HPGDS_MOUSE	Hpgds	Hematopoietic prostaglandin D synthase	58.7112	44.5402	0.033093	2.71244	1.55484	26.7871	0.303407
Q3TFQ1	Q3TFQ1	SPRY7_MOUSE	Spryd7	SPRY domain-containing protein 7	5.21821	8.52721	0.0333411	-2.52601	-6.28925	-0.328749	0.303862
Q01768	Q01768	NDKB_MOUSE	Nme2	Nucleoside diphosphate kinase B	384.077	450.391	0.0333525	-2.47649	-126.205	-6.4233	0.303862
P26040	P26040	EZRI_MOUSE	Ezr	Ezrin	87.6824	111.911	0.0334483	-2.68257	-45.886	-2.57163	0.303862
Q62084	Q62084	PP14B_MOUSE	Ppp1r14b	Protein phosphatase 1 regulatory subunit 14B	329.062	387.599	0.0335469	-2.52515	-111.33	-5.74436	0.303862
Q91VJ5	Q91VJ5	PQBP1_MOUSE	Pqbp1	Polyglutamine-binding protein 1	26.3702	38.7611	0.0335528	-2.46751	-23.6009	-1.18091	0.303862
O55131	Q9DA97;Q8C650;O55131	SEPT7_MOUSE	Septin7	Septin-7	57.9405	65.6168	0.0337107	-2.45955	-14.6306	-0.721883	0.304547
Q9DBG5	Q9DBG5	PLIN3_MOUSE	Plin3	Perilipin-3	93.7395	105.437	0.0338962	-2.45661	-22.3086	-1.08635	0.305039
Q9EQH2	Q9EQH2	ERAP1_MOUSE	Erap1	Endoplasmic reticulum aminopeptidase 1	51.9189	60.6173	0.0339494	-2.45616	-16.5917	-0.805078	0.305039
Q8K400	Q8K400	STXB5_MOUSE	Stxbp5	Syntaxin-binding protein 5	25.9556	20.8753	0.0340122	2.73168	0.532727	9.62801	0.305039
Q8CDN6	Q8CDN6	TXNL1_MOUSE	Txnl1	Thioredoxin-like protein 1	112.728	134.811	0.0342591	-2.461	-42.1554	-2.01101	0.306341
P97452	P97452	BOP1_MOUSE	Bop1	Ribosome biogenesis protein BOP1	0.683907	3.10963	0.034364	-2.44901	-4.63332	-0.218125	0.306341
Q3TBD2	Q3TBD2	HMHA1_MOUSE	Arhgap45	Rho GTPase-activating protein 45	34.9555	31.1091	0.0344055	2.50981	0.355828	7.33701	0.306341
Q9JM76	Q9JM76	ARPC3_MOUSE	Arpc3	Actin-related protein 2/3 complex subunit 3	222.791	261.273	0.0347396	-2.44648	-73.588	-3.37595	0.308574
Q60875	Q60875	ARHG2_MOUSE	Arhgef2	Rho guanine nucleotide exchange factor 2	30.6239	25.2589	0.0348455	2.45992	0.470795	10.2592	0.308775
Q9QY24	Q9QY24	ZBP1_MOUSE	Zbp1	Z-DNA-binding protein 1	24.0672	38.703	0.0349559	-2.45986	-27.9964	-1.2753	0.308779
Q8BVY0	Q8BVY0	RL1D1_MOUSE	Rsl1d1	Ribosomal L1 domain-containing protein 1	18.2128	12.5876	0.0350128	2.73499	0.555238	10.6952	0.308779
Q91WK0	Q91WK0	LRRF2_MOUSE	Lrrfip2	Leucine-rich repeat flightless-interacting protein 2	4.2565	8.17004	0.0351844	-2.62702	-7.46268	-0.364409	0.309272
Q61166	Q61166	MARE1_MOUSE	Mapre1	Microtubule-associated protein RP/EB family member 1	44.6761	48.9601	0.0352356	-2.43774	-8.20553	-0.3624	0.309272
O70161	O70161	PI51C_MOUSE	Pip5k1c	Phosphatidylinositol 4-phosphate 5-kinase type-1 gamma	19.1085	15.8249	0.0355246	2.52194	0.28448	6.28265	0.31053
P28741	P28741	KIF3A_MOUSE	Kif3a	Kinesin-like protein KIF3A	9.30747	6.94354	0.0355467	2.604	0.212685	4.51518	0.31053
P11404	P11404	FABPH_MOUSE	Fabp3	Fatty acid-binding protein, heart	13.9605	31.9437	0.0358658	-2.42655	-34.5164	-1.45009	0.312581
Q99JI6	P62835;Q99JI6	RAP1B_MOUSE	Rap1b	Ras-related protein Rap-1b	361.171	427.175	0.0361741	-2.64861	-126.201	-5.80745	0.314528
Q91V64	Q91V64	ISOC1_MOUSE	Isoc1	Isochorismatase domain-containing protein 1	44.6583	51.7729	0.0364114	-2.43118	-13.6755	-0.553685	0.31585
Q9D172	Q9D172	GAL3A_MOUSE	Gatd3	Glutamine amidotransferase-like class 1 domain-containing protein 3, mitochondrial	71.3431	83.2052	0.0366031	-2.42283	-22.8175	-0.906545	0.316771
Q9EQP2	Q9QXY6;Q9EQP2	EHD4_MOUSE	Ehd4	EH domain-containing protein 4	152.14	142.063	0.0368116	2.63213	0.840963	19.3127	0.317833
Q80WQ2	Q80WQ2	VAC14_MOUSE	Vac14	Protein VAC14 homolog	27.653	24.4688	0.037326	2.40256	0.228151	6.14018	0.320744
Q8K012	Q8K012	FBP1L_MOUSE	Fnbp1l	Formin-binding protein 1-like	6.71467	10.8498	0.0373984	-2.5953	-7.94548	-0.324723	0.320744
Q5ND34	Q5ND34	WDR81_MOUSE	Wdr81	WD repeat-containing protein 81	18.1398	14.9556	0.0374086	2.48732	0.23704	6.13139	0.320744
O88643	O88643	PAK1_MOUSE	Pak1	Serine/threonine-protein kinase PAK 1	8.71678	4.35182	0.0375606	2.41794	0.309722	8.42018	0.321303
P09055	P09055	ITB1_MOUSE	Itgb1	Integrin beta-1	45.67	52.8276	0.0377216	-2.41641	-13.814	-0.501109	0.321937
Q6NV83	Q6NV83	SR140_MOUSE	U2surp	U2 snRNP-associated SURP motif-containing protein	15.116	12.8053	0.0378995	2.3916	0.157372	4.46403	0.322024
Q60864	Q60864	STIP1_MOUSE	Stip1	Stress-induced-phosphoprotein 1	42.9737	48.0454	0.0379056	-2.53866	-9.77084	-0.372558	0.322024
Q9DBL2	Q9DBL2	GDAP2_MOUSE	Gdap2	Ganglioside-induced differentiation-associated protein 2	6.13648	14.3759	0.0381691	-2.41923	-15.9215	-0.55734	0.322829
Q91Z22	Q91Z22	PORIM_MOUSE	Tmem123	Porimin	46.6957	38.8949	0.0381747	2.39122	0.519472	15.0821	0.322829
Q04899	Q04899	CDK18_MOUSE	Cdk18	Cyclin-dependent kinase 18	12.3624	10.2868	0.0384578	2.39871	0.13557	4.01569	0.324482
P35492	P35492	HUTH_MOUSE	Hal	Histidine ammonia-lyase	43.9042	47.2672	0.0388436	-2.4306	-6.50978	-0.216222	0.326755
Q9EPJ9	Q9EPJ9	ARFG1_MOUSE	Arfgap1	ADP-ribosylation factor GTPase-activating protein 1	3.43132	7.97238	0.0389821	-2.4386	-8.79245	-0.289679	0.326755
Q8BYU6	Q8BYU6	TOIP2_MOUSE	Tor1aip2	Torsin-1A-interacting protein 2	19.7031	23.7382	0.0389918	-2.40977	-7.81705	-0.253247	0.326755
Q9D4D4	Q9D4D4	TKTL2_MOUSE	Tktl2	Transketolase-like protein 2	5.61247	13.2569	0.0393666	-2.36886	-14.8354	-0.453586	0.329151
P48678	P48678	LMNA_MOUSE	Lmna	Prelamin-A/C	417.443	373.71	0.0396415	2.41004	2.58779	84.8782	0.330137
Q8R3U1	Q8R3U1	PLAT3_MOUSE	Plaat3	Phospholipase A and acyltransferase 3	3.28328	20.901	0.0397182	-2.61313	-34.0894	-1.14595	0.330137
Q8CBW3	Q8CBW3	ABI1_MOUSE	Abi1	Abl interactor 1	106.702	117.118	0.0397519	-2.38504	-20.2295	-0.601642	0.330137
Q3TC72	Q3TC72	FAHD2_MOUSE	Fahd2	Fumarylacetoacetate hydrolase domain-containing protein 2A	11.3325	13.8214	0.0400531	-2.43328	-4.83427	-0.14336	0.331894
Q9CQ79	Q9CQ79	TXND9_MOUSE	Txndc9	Thioredoxin domain-containing protein 9	2.60328	5.08472	0.0401992	-2.52504	-4.81519	-0.147701	0.332361
Q9CWZ7	Q9CWZ7	SNAG_MOUSE	Napg	Gamma-soluble NSF attachment protein	16.4358	18.8352	0.0404972	-2.35213	-4.67237	-0.126432	0.334079
P28352	P28352	APEX1_MOUSE	Apex1	DNA-(apurinic or apyrimidinic site) endonuclease	48.4894	35.9139	0.0408941	2.63369	0.733956	24.417	0.336604
Q8BVI4	Q8BVI4	DHPR_MOUSE	Qdpr	Dihydropteridine reductase	87.0627	97.9202	0.0412549	-2.36774	-21.1828	-0.532307	0.337871
P01942	P01942;P06467	HBA_MOUSE	Hba	Hemoglobin subunit alpha	1496.43	513.363	0.0412839	2.67989	56.1438	1910	0.337871
Q8BXQ2	Q8BXQ2	PIGT_MOUSE	Pigt	GPI transamidase component PIG-T	10.2047	13.2492	0.0414553	-2.66256	-5.91967	-0.169229	0.337871
D3Z6Q9	D3Z6Q9	BIN2_MOUSE	Bin2	Bridging integrator 2	39.3119	35.724	0.0414579	2.33963	0.16919	7.00648	0.337871
P17879;Q61696	P17879;Q61696	HS71A_MOUSE;HS71B_MOUSE	Hspa1a;Hspa1b	Heat shock 70 kDa protein 1B	8.92628	16.8244	0.0415041	-2.63533	-15.365	-0.431224	0.337871
Q80VQ0	Q80VQ0;J3QMK6	AL3B1_MOUSE	Aldh3b1	Aldehyde dehydrogenase family 3 member B1	118.095	101.512	0.0418254	2.35512	0.755819	32.4105	0.338798
Q8BT60	Q8BT60	CPNE3_MOUSE	Cpne3	Copine-3	70.2177	82.2187	0.04196	-2.48593	-23.4244	-0.577565	0.338798
Q9Z1P6	Q9Z1P6	NDUA7_MOUSE	Ndufa7	NADH dehydrogenase [ubiquinone] 1 alpha subcomplex subunit 7	40.0192	32.9197	0.0420995	2.33516	0.30941	13.8895	0.338798
Q91YR9	Q91YR9	PTGR1_MOUSE	Ptgr1	Prostaglandin reductase 1	71.2892	80.5874	0.0421094	-2.35973	-18.1858	-0.410468	0.338798
Q2TBA3	Q2TBA3	MALT1_MOUSE	Malt1	Mucosa-associated lymphoid tissue lymphoma translocation protein 1 homolog	22.4805	37.7249	0.042163	-2.45189	-29.7859	-0.703025	0.338798
Q9DCL2	Q9DCL2	CIA2A_MOUSE	Ciao2a	Cytosolic iron-sulfur assembly component 2A	9.89583	7.90652	0.0421703	2.34258	0.0863083	3.89231	0.338798
Q9CPR5	Q9CPR5	RM15_MOUSE	Mrpl15	39S ribosomal protein L15, mitochondrial	1.2205	3.36831	0.0422849	-2.47809	-4.19672	-0.0988872	0.338798
Q9Z1Q2	Q9Z1Q2	ABHGA_MOUSE	Abhd16a	Phosphatidylserine lipase ABHD16A	11.9681	14.6635	0.0423576	-2.37678	-5.27421	-0.116439	0.338798
Q9D6J6	Q9D6J6	NDUV2_MOUSE	Ndufv2	NADH dehydrogenase [ubiquinone] flavoprotein 2, mitochondrial	26.6892	23.1335	0.0424412	2.37344	0.151678	6.95962	0.338798
Q8C0D5	Q8C0D5	EFL1_MOUSE	Efl1	Elongation factor-like GTPase 1	16.8386	14.4438	0.0426509	2.64581	0.114058	4.67548	0.339292
Q60738	Q60738	ZNT1_MOUSE	Slc30a1	Zinc transporter 1	20.0642	28.7037	0.042734	-2.35724	-16.9277	-0.351348	0.339292
Q9JJA2	Q9JJA2	COG8_MOUSE	Cog8	Conserved oligomeric Golgi complex subunit 8	3.18767	7.07375	0.0427779	-2.58423	-7.59536	-0.176811	0.339292
P97825	P97825	JUPI1_MOUSE	Jpt1	Jupiter microtubule associated homolog 1	30.6041	46.0176	0.0435017	-2.55383	-30.2037	-0.623245	0.344295
Q9D6Y7	Q9D6Y7	MSRA_MOUSE	Msra	Mitochondrial peptide methionine sulfoxide reductase	27.3184	20.0647	0.0437927	2.42162	0.262	14.2455	0.34586
Q07417	Q07417	ACADS_MOUSE	Acads	Short-chain specific acyl-CoA dehydrogenase, mitochondrial	54.663	62.2253	0.0440989	-2.33923	-14.8765	-0.248211	0.347537
Q3UE37	Q3UE37	UBE2Z_MOUSE	Ube2z	Ubiquitin-conjugating enzyme E2 Z	15.9053	12.8763	0.0444571	2.38549	0.09597	5.96201	0.349616
P61971	P61971	NTF2_MOUSE	Nutf2	Nuclear transport factor 2	49.5363	57.2136	0.0446012	-2.32449	-15.1258	-0.228915	0.349751
Q9CWF2	Q9CWF2	TBB2B_MOUSE	Tubb2b	Tubulin beta-2B chain	5.82325	9.049	0.0446632	-2.57473	-6.34289	-0.108616	0.349751
O55091	O55091	IMPCT_MOUSE	Impact	Protein IMPACT	5.86543	10.9398	0.044774	-2.47602	-9.98934	-0.159307	0.349879
Q9Z266	Q9Z266	SNAPN_MOUSE	Snapin	SNARE-associated protein Snapin	5.62113	12.3052	0.0450775	-2.52308	-13.1654	-0.202654	0.351389
P61028	P55258;P61028	RAB8B_MOUSE	Rab8b	Ras-related protein Rab-8B	135.394	148.777	0.0451569	-2.32313	-26.4087	-0.358294	0.351389
Q61210	Q61210	ARHG1_MOUSE	Arhgef1	Rho guanine nucleotide exchange factor 1	44.5478	38.079	0.0454727	2.28558	0.158454	12.7792	0.352736
Q62425	Q62425	NDUA4_MOUSE	Ndufa4	Cytochrome c oxidase subunit NDUFA4	60.2004	43.8233	0.0455205	2.36157	0.415087	32.3391	0.352736
P59672	P59672	ANS1A_MOUSE	Anks1a	Ankyrin repeat and SAM domain-containing protein 1A	4.32672	7.49012	0.0457033	-2.39641	-6.24832	-0.0784703	0.353413
Q8CIH5	Q8CIH5	PLCG2_MOUSE	Plcg2	1-phosphatidylinositol 4,5-bisphosphate phosphodiesterase gamma-2	32.0675	28.9198	0.0460638	2.39017	0.071362	6.22404	0.355459
Q8BG81	Q8BG81	PDIP3_MOUSE	Poldip3	Polymerase delta-interacting protein 3	4.65214	7.32369	0.0465027	-2.32949	-5.29104	-0.0520548	0.358099
P28063	P28063	PSB8_MOUSE	Psmb8	Proteasome subunit beta type-8	74.4714	87.4731	0.0466463	-2.26975	-25.7689	-0.234487	0.358461
Q8VHR5	Q8VHR5	P66B_MOUSE	Gatad2b	Transcriptional repressor p66-beta	6.37061	4.62289	0.0467718	2.28751	0.0306835	3.46475	0.358516
Q8R5A3	Q8R5A3	AB1IP_MOUSE	Apbb1ip	Amyloid beta A4 precursor protein-binding family B member 1-interacting protein	32.6019	36.6697	0.0468471	-2.30574	-8.0651	-0.0705355	0.358516
Q08943	Q08943	SSRP1_MOUSE	Ssrp1	FACT complex subunit SSRP1	29.3182	26.5723	0.0471062	2.26496	0.0426655	5.4491	0.359756
Q91XE8	Q91XE8	TM205_MOUSE	Tmem205	Transmembrane protein 205	19.6288	15.8766	0.0473479	2.35966	0.056567	7.44783	0.360734
Q9CR61	Q9CR61	NDUB7_MOUSE	Ndufb7	NADH dehydrogenase [ubiquinone] 1 beta subcomplex subunit 7	20.4917	13.9019	0.0474857	2.42797	0.0978768	13.0816	0.360734
P08775	P08775	RPB1_MOUSE	Polr2a	DNA-directed RNA polymerase II subunit RPB1	13.2894	11.5167	0.0475265	2.47436	0.0265538	3.51885	0.360734
P51670	P51670	CCL9_MOUSE	Ccl9	C-C motif chemokine 9	13.9699	6.05248	0.0477114	2.31269	0.100338	15.7345	0.361396
P70658	P70658	CXCR4_MOUSE	Cxcr4	C-X-C chemokine receptor type 4	6.35436	3.0769	0.0478497	2.32013	0.0392148	6.51571	0.361705
Q8CII9	Q8CII9	CRLF2_MOUSE	Crlf2	Cytokine receptor-like factor 2	9.90558	18.697	0.0480736	-2.5348	-17.4768	-0.10597	0.362657
Q91ZJ5	Q91ZJ5	UGPA_MOUSE	Ugp2	UTP--glucose-1-phosphate uridylyltransferase	35.4416	38.3827	0.0482949	-2.35397	-5.85373	-0.0285006	0.363586
Q9CWS1	Q9CWS1	RN135_MOUSE	Rnf135	E3 ubiquitin-protein ligase RNF135	1.55978	5.30638	0.0487394	-2.44985	-7.46484	-0.0283467	0.365907
Q9CZU3	Q9CZU3	MTREX_MOUSE	Mtrex	Exosome RNA helicase MTR4	11.0678	8.85046	0.0488007	2.52943	0.0166353	4.41797	0.365907
O08917	O08917	FLOT1_MOUSE	Flot1	Flotillin-1	16.5231	14.1066	0.049029	2.25936	0.0126305	4.82024	0.366876
Q569Z6	Q569Z6	TR150_MOUSE	Thrap3	Thyroid hormone receptor-associated protein 3	40.2527	35.9001	0.0491287	2.36188	0.021709	8.68336	0.366881
P30999	P30999	CTND1_MOUSE	Ctnnd1	Catenin delta-1	23.0054	20.4061	0.0492311	2.31434	0.0111317	5.18747	0.366905
Q91W50	Q91W50	CSDE1_MOUSE	Csde1	Cold shock domain-containing protein E1	35.2278	30.6488	0.049809	2.38504	0.00508313	9.15298	0.369969
Q9QUI0	Q9QUI0;Q62159;P62746	RHOA_MOUSE	Rhoa	Transforming protein RhoA	408.058	505.996	0.0498737	-2.39278	-195.804	-0.0722524	0.369969
P0C6B7	P0C6B7	IGSF6_MOUSE	Igsf6	Immunoglobulin superfamily member 6	6.44185	5.25641	0.0499419	2.23269	0.000365783	2.37052	0.369969
Q8R3D1	Q8R3D1	TBC13_MOUSE	Tbc1d13	TBC1 domain family member 13	11.4001	14.1301	0.0503515	-2.35442	-5.46538	0.00549238	0.370735
O88842	O88842	FGD3_MOUSE	Fgd3	FYVE, RhoGEF and PH domain-containing protein 3	7.77162	2.55357	0.0503804	2.22428	-0.0104945	10.4466	0.370735
Q3UVK0	Q3UVK0	ERMP1_MOUSE	Ermp1	Endoplasmic reticulum metallopeptidase 1	5.71618	12.3842	0.0503886	-2.50702	-13.3522	0.0161164	0.370735
P06797	P06797	CATL1_MOUSE	Ctsl	Procathepsin L	107.215	91.5229	0.0505169	2.23031	-0.0430787	31.4272	0.370735
Q8VE99	Q8VE99	CC115_MOUSE	Ccdc115	Coiled-coil domain-containing protein 115	23.8455	21.0681	0.0505457	2.22176	-0.00800506	5.56281	0.370735
P60122	P60122	RUVB1_MOUSE	Ruvbl1	RuvB-like 1	36.9153	41.2846	0.0508613	-2.36274	-8.76028	0.0216777	0.372313
Q9CU62	Q9CU62	SMC1A_MOUSE	Smc1a	Structural maintenance of chromosomes protein 1A	24.3891	21.0154	0.0520784	2.27209	-0.0384231	6.78579	0.379605
P25799	P25799	NFKB1_MOUSE	Nfkb1	Nuclear factor NF-kappa-B p105 subunit	26.5622	34.3634	0.0523431	-2.38821	-15.7097	0.107369	0.379605
P14152	P14152	MDHC_MOUSE	Mdh1	Malate dehydrogenase, cytoplasmic	103.707	119.741	0.0523979	-2.20049	-32.2692	0.201491	0.379605
Q9CQS8	Q9CQS8	SC61B_MOUSE	Sec61b	Protein transport protein Sec61 subunit beta	113.888	82.2759	0.052454	2.33642	-0.442468	63.6676	0.379605
A6H8H2	A6H8H2	DEN4C_MOUSE	Dennd4c	DENN domain-containing protein 4C	27.6995	23.6759	0.0525489	2.29965	-0.0572423	8.10441	0.379605
P16858	P16858	G3P_MOUSE	Gapdh	Glyceraldehyde-3-phosphate dehydrogenase	1496.43	1729.37	0.0525714	-2.217	-469.038	3.1747	0.379605
Q9D8Z2	Q9D8Z2	TRIA1_MOUSE	Triap1	TP53-regulated inhibitor of apoptosis 1	10.2913	7.28804	0.0525749	2.29968	-0.0431672	6.04975	0.379605
Q9D1L0	Q9D1L0	CHCH2_MOUSE	Chchd2	Coiled-coil-helix-coiled-coil-helix domain-containing protein 2	11.9974	19.0841	0.0528045	-2.22529	-14.2793	0.105991	0.379903
Q6PDQ2	Q6PDQ2	CHD4_MOUSE	Chd4	Chromodomain-helicase-DNA-binding protein 4	24.8477	21.7339	0.0528214	2.26972	-0.0481888	6.27592	0.379903
P42932	P42932	TCPQ_MOUSE	Cct8	T-complex protein 1 subunit theta	240.317	255.293	0.0530405	-2.41385	-30.224	0.271979	0.380607
Q8BWM0	Q8BWM0	PGES2_MOUSE	Ptges2	Prostaglandin E synthase 2	10.16	16.5876	0.0531246	-2.19926	-12.9607	0.105418	0.380607
Q07797	Q07797	LG3BP_MOUSE	Lgals3bp	Galectin-3-binding protein	219.158	308.136	0.0534587	-2.5026	-179.887	1.93043	0.381742
P53702	P53702	CCHL_MOUSE	Hccs	Holocytochrome c-type synthase	1.51464	6.8891	0.0536021	-2.31889	-10.8586	0.109706	0.381742
O70309	O70309	ITB5_MOUSE	Itgb5	Integrin beta-5	14.8408	13.1195	0.0537573	2.32471	-0.0367959	3.4794	0.381742
P61082	P61082	UBC12_MOUSE	Ube2m	NEDD8-conjugating enzyme Ubc12	25.2581	28.6222	0.053902	-2.28008	-6.80093	0.0727289	0.381742
P63038	P63038	CH60_MOUSE	Hspd1	60 kDa heat shock protein, mitochondrial	171.146	191.577	0.0539854	-2.21433	-41.2932	0.432838	0.381742
Q8R0S2	Q8R0S2	IQEC1_MOUSE	Iqsec1	IQ motif and SEC7 domain-containing protein 1	4.93567	1.32224	0.0540519	2.22873	-0.0785797	7.30542	0.381742
P47955	P47955	RLA1_MOUSE	Rplp1	60S acidic ribosomal protein P1	381.523	508.259	0.0541407	-2.20459	-256.246	2.77344	0.381742
Q99LF4	Q99LF4	RTCB_MOUSE	Rtcb	RNA-splicing ligase RtcB homolog	45.8319	51.7783	0.054182	-2.31206	-12.0333	0.140623	0.381742
Q61584	Q61584	FXR1_MOUSE	Fxr1	Fragile X mental retardation syndrome-related protein 1	50.5189	57.7319	0.0542107	-2.18771	-14.5847	0.158768	0.381742
Q05921	Q05921	RN5A_MOUSE	Rnasel	2-5A-dependent ribonuclease	14.6979	13.3047	0.0544379	2.18172	-0.0322153	2.81852	0.382412
Q3THS6	Q3THS6	METK2_MOUSE	Mat2a	S-adenosylmethionine synthase isoform type-2	45.7864	56.5914	0.0545122	-2.41789	-21.9034	0.293385	0.382412
O35379	O35379	MRP1_MOUSE	Abcc1	Multidrug resistance-associated protein 1	12.9273	10.8036	0.054717	2.4052	-0.0599	4.30721	0.382811
P0C8B4	P0C8B4	GON7_MOUSE	Gon7	EKC/KEOPS complex subunit GON7	6.21143	13.1524	0.0548531	-2.46499	-14.0901	0.20821	0.382811
Q6P1H6	Q6P1H6	ANKL2_MOUSE	Ankle2	Ankyrin repeat and LEM domain-containing protein 2	2.96537	6.48501	0.0548793	-2.24023	-7.13237	0.0931093	0.382811
Q9CQM5	Q9CQM5	TXD17_MOUSE	Txndc17	Thioredoxin domain-containing protein 17	114.488	141.972	0.0551195	-2.24987	-55.7365	0.768197	0.383765
Q9ESV0	Q9ESV0	DDX24_MOUSE	Ddx24	ATP-dependent RNA helicase DDX24	2.96093	6.26012	0.0554286	-2.47232	-6.70975	0.111368	0.384871
P09411	P09411	PGK1_MOUSE	Pgk1	Phosphoglycerate kinase 1	505.416	589.364	0.0555416	-2.26973	-170.47	2.57545	0.384871
Q9D0S9	Q9D0S9	HINT2_MOUSE	Hint2	Adenosine 5'-monophosphoramidase HINT2	16.3357	19.0266	0.0555902	-2.4404	-5.4739	0.0920029	0.384871
Q8BJW5	Q8BJW5	NOL11_MOUSE	Nol11	Nucleolar protein 11	3.19106	9.66825	0.0559645	-2.23109	-13.1634	0.209012	0.385783
Q64704	Q64704	STX3_MOUSE	Stx3	Syntaxin-3	8.48508	15.3359	0.0560081	-2.34213	-13.9401	0.238474	0.385783
Q91WB4	Q91WB4	PKHF2_MOUSE	Plekhf2	Pleckstrin homology domain-containing family F member 2	20.5705	25.7718	0.0560344	-2.16216	-10.5648	0.162258	0.385783
E9Q555	E9Q555	RN213_MOUSE	Rnf213	E3 ubiquitin-protein ligase RNF213	24.3905	31.0221	0.056383	-2.30753	-13.5039	0.240557	0.387463
O35075	O35075	VP26C_MOUSE	Vps26c	Vacuolar protein sorting-associated protein 26C	32.4519	22.2091	0.0565484	2.43518	-0.410493	20.8962	0.38788
P08101	P08101	FCGR2_MOUSE	Fcgr2	Low affinity immunoglobulin gamma Fc region receptor II	7.68445	15.7951	0.0567254	-2.15729	-16.5031	0.281714	0.388019
P14211	P14211	CALR_MOUSE	Calr	Calreticulin	306.932	337.478	0.0567781	-2.15816	-62.1631	1.07013	0.388019
Q8BH95	Q8BH95	ECHM_MOUSE	Echs1	Enoyl-CoA hydratase, mitochondrial	55.5994	67.4696	0.0572992	-2.19554	-24.2005	0.460082	0.390658
P70202	P70202	LXN_MOUSE	Lxn	Latexin	9.72617	17.4082	0.0574598	-2.31139	-15.6918	0.327684	0.390658
P97376	P97376	FRG1_MOUSE	Frg1	Protein FRG1	3.90466	8.19563	0.0574807	-2.39287	-8.77447	0.192527	0.390658
Q61462	Q61462	CY24A_MOUSE	Cyba	Cytochrome b-245 light chain	26.957	39.6665	0.0582944	-2.34948	-26.0376	0.618484	0.394932
P52480	P52480	KPYM_MOUSE	Pkm	Pyruvate kinase PKM	1387.54	1532.38	0.0583229	-2.33633	-296.705	7.01875	0.394932
Q8K330	Q8K330	SSH3_MOUSE	Ssh3	Protein phosphatase Slingshot homolog 3	6.61562	11.8951	0.058493	-2.27255	-10.8103	0.251266	0.395147
Q62433	Q62433	NDRG1_MOUSE	Ndrg1	Protein NDRG1	46.6286	59.2845	0.0585679	-2.20306	-25.893	0.581234	0.395147
P62631	P62631	EF1A2_MOUSE	Eef1a2	Elongation factor 1-alpha 2	70.9653	94.6021	0.0588846	-2.34011	-48.5017	1.22794	0.396561
Q8VI63	Q8VI63	MOB2_MOUSE	Mob2	MOB kinase activator 2	5.52276	8.822	0.0590038	-2.32953	-6.77117	0.172682	0.396643
P60710;P63260	P60710;P63260	ACTB_MOUSE;ACTG_MOUSE	Actb;Actg1	Actin, cytoplasmic 1	8012.06	10252.6	0.0592247	-2.32805	-4601.23	120.137	0.396994
P45952	P45952	ACADM_MOUSE	Acadm	Medium-chain specific acyl-CoA dehydrogenase, mitochondrial	55.5296	61.1433	0.0592704	-2.16217	-11.4994	0.272039	0.396994
Q00519	Q00519	XDH_MOUSE	Xdh	Xanthine dehydrogenase/oxidase	77.7955	72.8006	0.0595179	2.18454	-0.252545	10.2425	0.397932
Q9DBS9	Q9DBS9	OSBL3_MOUSE	Osbpl3	Oxysterol-binding protein-related protein 3	3.57793	7.49927	0.0598189	-2.39572	-8.07601	0.233326	0.398223
Q9DBC7	Q9DBC7	KAP0_MOUSE	Prkar1a	cAMP-dependent protein kinase type I-alpha regulatory subunit	121.659	136.938	0.0598227	-2.12518	-31.323	0.766	0.398223
Q9QZQ8	Q9QZQ8	H2AY_MOUSE	Macroh2a1	Core histone macro-H2A.1	247.726	200.808	0.0599615	2.13523	-2.40367	96.2407	0.398223
Q9CX84	Q9CX84	RGS19_MOUSE	Rgs19	Regulator of G-protein signaling 19	42.3437	35.6107	0.0599915	2.18105	-0.357112	13.823	0.398223
Q9DBZ5	Q9DBZ5	EIF3K_MOUSE	Eif3k	Eukaryotic translation initiation factor 3 subunit K	49.5054	59.6163	0.0601057	-2.17201	-20.7611	0.539305	0.398268
Q8BU31	Q8BU31	RAP2C_MOUSE	Rap2c	Ras-related protein Rap-2c	9.62003	20.0415	0.0603579	-2.38452	-21.4942	0.651282	0.399224
P21550	P21550	ENOB_MOUSE	Eno3	Beta-enolase	38.5332	44.6732	0.0608874	-2.16504	-12.6322	0.352132	0.400851
O55022	O55022	PGRC1_MOUSE	Pgrmc1	Membrane-associated progesterone receptor component 1	122.672	109.731	0.0608919	2.11846	-0.718704	26.6017	0.400851
Q01965	Q01965	LY9_MOUSE	Ly9	T-lymphocyte surface antigen Ly-9	27.4205	31.1624	0.0609285	-2.17158	-7.70021	0.216405	0.400851
Q921G7	Q921G7	ETFD_MOUSE	Etfdh	Electron transfer flavoprotein-ubiquinone oxidoreductase, mitochondrial	28.0746	24.0473	0.0610569	2.18054	-0.237198	8.29183	0.400984
Q8BZZ3	Q8BZZ3	WWP1_MOUSE	Wwp1	NEDD4-like E3 ubiquitin-protein ligase WWP1	7.60019	5.81457	0.0612177	2.22608	-0.11004	3.68128	0.401328
Q91WM2	Q91WM2	HDHD5_MOUSE	Hdhd5	Haloacid dehalogenase-like hydrolase domain-containing 5	3.86932	9.98362	0.0613821	-2.30909	-12.6317	0.403113	0.401695
P62835	P62835	RAP1A_MOUSE	Rap1a	Ras-related protein Rap-1A	25.848	18.1242	0.0621119	2.20151	-0.507314	15.9549	0.405526
P60766	P60766	CDC42_MOUSE	Cdc42	Cell division control protein 42 homolog	267.786	334.082	0.0623584	-2.10717	-136.756	4.16512	0.405526
Q60605	Q60605	MYL6_MOUSE	Myl6	Myosin light polypeptide 6	543.2	593.103	0.0624002	-2.1262	-102.994	3.18946	0.405526
Q9CY97	Q9CY97	SSU72_MOUSE	Ssu72	RNA polymerase II subunit A C-terminal domain phosphatase SSU72	9.09592	4.63379	0.0625612	2.10802	-0.285321	9.20959	0.405526
P52332	P52332	JAK1_MOUSE	Jak1	Tyrosine-protein kinase JAK1	19.0049	21.1532	0.0625897	-2.11026	-4.43455	0.137917	0.405526
P48453	P48453	PP2BB_MOUSE	Ppp3cb	Serine/threonine-protein phosphatase 2B catalytic subunit beta isoform	19.262	11.4993	0.0627926	2.10273	-0.503997	16.0295	0.405526
Q9JKF7	Q9JKF7	RM39_MOUSE	Mrpl39	39S ribosomal protein L39, mitochondrial	4.94236	10.4094	0.0628649	-2.17997	-11.311	0.376949	0.405526
Q9D1L9	Q9D1L9	LTOR5_MOUSE	Lamtor5	Ragulator complex protein LAMTOR5	83.9868	97.4601	0.0630278	-2.20436	-27.9036	0.956874	0.405526
P34960	P34960	MMP12_MOUSE	Mmp12	Macrophage metalloelastase	65.9056	39.2168	0.0631344	2.24687	-1.96564	55.3433	0.405526
Q8K224	Q8K224	NAT10_MOUSE	Nat10	RNA cytidine acetyltransferase	11.7673	9.38993	0.0631639	2.09321	-0.157938	4.91261	0.405526
Q8JZQ9	Q8JZQ9	EIF3B_MOUSE	Eif3b	Eukaryotic translation initiation factor 3 subunit B	52.8183	56.5821	0.063232	-2.15083	-7.78963	0.261968	0.405526
Q64511	Q64511	TOP2B_MOUSE	Top2b	DNA topoisomerase 2-beta	9.49277	8.33281	0.0632813	2.10271	-0.0783227	2.39825	0.405526
Q7TT37	Q7TT37	ELP1_MOUSE	Elp1	Elongator complex protein 1	15.7933	12.5383	0.0638315	2.15977	-0.238807	6.74871	0.408345
Q8K2V1	Q8K2V1	PP4R1_MOUSE	Ppp4r1	Serine/threonine-protein phosphatase 4 regulatory subunit 1	10.7248	8.90791	0.0642965	2.17607	-0.139572	3.77331	0.410039
Q9JLV5	Q9JLV5	CUL3_MOUSE	Cul3	Cullin-3	15.6853	13.1123	0.0643176	2.20781	-0.202246	5.34815	0.410039
P17182	P17182	ENOA_MOUSE	Eno1	Alpha-enolase	671.33	743.602	0.0647787	-2.19582	-150.373	5.82704	0.411461
Q3UMR5	Q3UMR5	MCU_MOUSE	Mcu	Calcium uniporter protein, mitochondrial	13.3721	9.81885	0.0649695	2.17195	-0.285713	7.39217	0.411461
P51174	P51174	ACADL_MOUSE	Acadl	Long-chain specific acyl-CoA dehydrogenase, mitochondrial	239.624	263.844	0.0649834	-2.13971	-50.3479	1.90623	0.411461
P0DOV2	P0DOV2	IFI4_MOUSE	Ifi204	Interferon-activable protein 204	58.0715	72.1077	0.0649953	-2.07283	-29.1257	1.05321	0.411461
P49710	P49710	HCLS1_MOUSE	Hcls1	Hematopoietic lineage cell-specific protein	215.591	258.064	0.065122	-2.2513	-88.5859	3.63892	0.411461
A2RTL5	A2RTL5	RSRC2_MOUSE	Rsrc2	Arginine/serine-rich coiled-coil protein 2	4.25548	7.56416	0.0652189	-2.25356	-6.90316	0.285807	0.411461
Q9R1T2	Q9R1T2	SAE1_MOUSE	Sae1	SUMO-activating enzyme subunit 1	25.607	28.7781	0.0653381	-2.07847	-6.58701	0.244715	0.411461
O55023	O55023	IMPA1_MOUSE	Impa1	Inositol monophosphatase 1	55.6324	61.7182	0.0655623	-2.07505	-12.6474	0.475672	0.411461
Q60967	Q60967	PAPS1_MOUSE	Papss1	Bifunctional 3'-phosphoadenosine 5'-phosphosulfate synthase 1	4.28806	8.81733	0.0657028	-2.24121	-9.45976	0.401216	0.411461
O09131	O09131	GSTO1_MOUSE	Gsto1	Glutathione S-transferase omega-1	110.448	127.414	0.0657581	-2.09398	-35.2952	1.3627	0.411461
P97484	P97484	LIRB3_MOUSE	Lilrb3	Leukocyte immunoglobulin-like receptor subfamily B member 3	21.9474	15.4484	0.0659376	2.09388	-0.528237	13.5262	0.411461
Q9WUQ2	Q9WUQ2	PREB_MOUSE	Preb	Prolactin regulatory element-binding protein	16.9608	15.3347	0.0659511	2.13773	-0.136536	3.3887	0.411461
Q9Z2W0	Q9Z2W0	DNPEP_MOUSE	Dnpep	Aspartyl aminopeptidase	30.443	33.9275	0.0660081	-2.14265	-7.26371	0.294712	0.411461
P36993	P36993	PPM1B_MOUSE	Ppm1b	Protein phosphatase 1B	11.6887	14.7226	0.0663309	-2.12077	-6.3258	0.258037	0.411461
Q9Z2U1	Q9Z2U1	PSA5_MOUSE	Psma5	Proteasome subunit alpha type-5	127.512	149.715	0.0663392	-2.13968	-46.3207	1.91505	0.411461
Q3U319	Q3U319	BRE1B_MOUSE	Rnf40	E3 ubiquitin-protein ligase BRE1B	2.82854	5.82855	0.0663757	-2.24236	-6.27807	0.278055	0.411461
Q9QXG4	Q9QXG4	ACSA_MOUSE	Acss2	Acetyl-coenzyme A synthetase, cytoplasmic	8.12998	14.365	0.0664292	-2.18411	-13.0278	0.557865	0.411461
Q9ERA6	Q9ERA6	TFP11_MOUSE	Tfip11	Tuftelin-interacting protein 11	12.6038	10.813	0.0665946	2.11482	-0.154259	3.73589	0.411557
P48193	P48193	EPB41_MOUSE	Epb41	Protein 4.1	13.4919	10.5495	0.066667	2.17028	-0.264795	6.14963	0.411557
Q62523	Q62523	ZYX_MOUSE	Zyx	Zyxin	51.0333	67.5775	0.0674133	-2.05688	-34.5253	1.43687	0.414726
Q91YS8	Q91YS8	KCC1A_MOUSE	Camk1	Calcium/calmodulin-dependent protein kinase type 1	1.26199	4.0215	0.0675065	-2.06952	-5.76236	0.243345	0.414726
Q9Z2X2	Q9Z2X2	PSD10_MOUSE	Psmd10	26S proteasome non-ATPase regulatory subunit 10	5.75064	8.5586	0.0675162	-2.15689	-5.87986	0.263957	0.414726
Q8CIG8	Q8CIG8	ANM5_MOUSE	Prmt5	Protein arginine N-methyltransferase 5	4.29656	7.58863	0.0679089	-2.21281	-6.91334	0.329201	0.416448
Q9Z2G9	Q9Z2G9	HTAI2_MOUSE	Htatip2	Oxidoreductase HTATIP2	16.3052	24.7343	0.0683384	-2.28674	-17.7651	0.906926	0.417937
Q9D8T0	Q9D8T0	FAM3A_MOUSE	Fam3a	Protein FAM3A	5.43343	9.74735	0.0683774	-2.30707	-9.09898	0.471147	0.417937
Q9JLZ3	Q9JLZ3	AUHM_MOUSE	Auh	Methylglutaconyl-CoA hydratase, mitochondrial	19.9511	22.9936	0.0687315	-2.04864	-6.3688	0.28383	0.41941
Q9D024	Q9D024	CCD47_MOUSE	Ccdc47	PAT complex subunit CCDC47	180.292	144.554	0.0688564	2.04228	-3.34132	74.8173	0.41948
Q8CGP0;Q9D2U9	Q9D2U9;Q8CGP0	H2B3A_MOUSE;H2B3B_MOUSE	H2bu1;H2bu2	Histone H2B type 3-B	146.236	413.559	0.0692077	-2.08796	-561.035	26.3891	0.420928
Q61233	Q61233	PLSL_MOUSE	Lcp1	Plastin-2	810.394	877.466	0.069606	-2.04059	-140.673	6.52971	0.422657
Q9CXT8	Q9CXT8	MPPB_MOUSE	Pmpcb	Mitochondrial-processing peptidase subunit beta	50.1931	55.4623	0.0697539	-2.04255	-11.0562	0.517912	0.422861
P61161	P61161	ARP2_MOUSE	Actr2	Actin-related protein 2	331.642	367.642	0.0699112	-2.14318	-75.8451	3.84474	0.42302
P27784	P27784	CCL6_MOUSE	Ccl6	C-C motif chemokine 6	6.74215	1.15751	0.0700084	2.17821	-0.614424	11.7837	0.42302
O70435	O70435	PSA3_MOUSE	Psma3	Proteasome subunit alpha type-3	119.763	141.429	0.070469	-2.0643	-45.5805	2.24967	0.424478
Q9QUR7	Q9QUR7	PIN1_MOUSE	Pin1	Peptidyl-prolyl cis-trans isomerase NIMA-interacting 1	37.2045	44.0247	0.0706329	-2.03392	-14.3382	0.697793	0.424478
Q8R1G6	Q8R1G6	PDLI2_MOUSE	Pdlim2	PDZ and LIM domain protein 2	2.70807	6.57161	0.0706846	-2.02615	-8.12104	0.393956	0.424478
Q62167	Q62095;P16381;Q62167	DDX3X_MOUSE	Ddx3x	ATP-dependent RNA helicase DDX3X	68.9116	61.4479	0.0707786	2.0778	-0.795722	15.7232	0.424478
Q8K4F5	Q8K4F5	ABHDB_MOUSE	Abhd11	Protein ABHD11	1.39422	3.85312	0.0708227	-2.02247	-5.1696	0.251801	0.424478
Q9CXY1	Q9CXY1	TM175_MOUSE	Tmem175	Endosomal/lysosomal potassium channel TMEM175	4.91973	3.65324	0.0710801	2.02213	-0.131388	2.66437	0.425332
Q921M4	Q921M4	GOGA2_MOUSE	Golga2	Golgin subfamily A member 2	11.36	15.3881	0.0713621	-2.21308	-8.54329	0.487074	0.42582
Q9DCE5	Q9DCE5	PK1IP_MOUSE	Pak1ip1	p21-activated protein kinase-interacting protein 1	4.83335	11.8142	0.0713916	-2.23801	-14.8212	0.859486	0.42582
Q9CQW9	Q9CQW9;Q99J93	IFM3_MOUSE	Ifitm3	Interferon-induced transmembrane protein 3	248.087	411.787	0.0715415	-2.27189	-348.159	20.7593	0.425847
Q9D2G2	Q9D2G2	ODO2_MOUSE	Dlst	Dihydrolipoyllysine-residue succinyltransferase component of 2-oxoglutarate dehydrogenase complex, mitochondrial	86.1604	96.2262	0.071626	-2.05175	-21.2303	1.09853	0.425847
Q8K2F8	Q8K2F8	LS14A_MOUSE	Lsm14a	Protein LSM14 homolog A	4.67309	9.47499	0.0718757	-2.24677	-10.2131	0.609254	0.425923
Q9JHI7	Q9JHI7	EXOS9_MOUSE	Exosc9	Exosome complex component RRP45	2.35986	6.48545	0.0720415	-2.01236	-8.69685	0.445664	0.425923
P47758	P47758	SRPRB_MOUSE	Srprb	Signal recognition particle receptor subunit beta	11.6178	13.7733	0.0721768	-2.04461	-4.55138	0.240404	0.425923
Q9WUD1	Q9WUD1	CHIP_MOUSE	Stub1	E3 ubiquitin-protein ligase CHIP	21.8873	19.9935	0.072255	2.02279	-0.208439	3.99604	0.425923
Q9JIA7	Q9JIA7	SPHK2_MOUSE	Sphk2	Sphingosine kinase 2	21.4535	28.1589	0.0723445	-2.10483	-14.1999	0.789051	0.425923
Q9QZH3	Q9QZH3	PPIE_MOUSE	Ppie	Peptidyl-prolyl cis-trans isomerase E	14.8713	16.9777	0.0724318	-2.01296	-4.44472	0.232016	0.425923
Q8BHL8	Q8BHL8	PSMF1_MOUSE	Psmf1	Proteasome inhibitor PI31 subunit	4.13525	8.44949	0.0724866	-2.15296	-9.15771	0.529225	0.425923
Q3UI43	Q3UI43	BABA1_MOUSE	Babam1	BRISC and BRCA1-A complex member 1	32.1236	36.3707	0.0725588	-2.08224	-8.99085	0.496585	0.425923
Q61390	Q61390	TCPW_MOUSE	Cct6b	T-complex protein 1 subunit zeta-2	2.81492	12.9802	0.0728497	-2.03591	-21.4937	1.16323	0.426955
Q9CPP0	Q9CPP0	NPM3_MOUSE	Npm3	Nucleoplasmin-3	17.7933	14.8806	0.0732315	2.01248	-0.333142	6.15841	0.427664
P17918	P17918	PCNA_MOUSE	Pcna	Proliferating cell nuclear antigen	150.308	199.876	0.0733738	-2.17018	-105.557	6.41968	0.427664
Q60872	Q60872;Q8BMJ3	IF1A_MOUSE	Eif1a	Eukaryotic translation initiation factor 1A	26.4547	29.0608	0.0734789	-2.01302	-5.5139	0.30167	0.427664
Q9D0I9	Q9D0I9	SYRC_MOUSE	Rars1	Arginine--tRNA ligase, cytoplasmic	83.9986	92.9471	0.0734797	-2.06841	-18.9785	1.08151	0.427664
Q9D6F9	Q9D6F9	TBB4A_MOUSE	Tubb4a	Tubulin beta-4A chain	59.597	105.269	0.0735481	-2.13008	-97.1403	5.79611	0.427664
Q9EPU0	Q9EPU0	RENT1_MOUSE	Upf1	Regulator of nonsense transcripts 1	27.8262	24.6957	0.0738461	2.18198	-0.417821	6.67892	0.427865
O88508	O88508;P0DOY1	DNM3A_MOUSE	Dnmt3a	DNA (cytosine-5)-methyltransferase 3A	13.4881	11.0068	0.0739167	2.01396	-0.293282	5.25587	0.427865
Q03347	Q03347	RUNX1_MOUSE	Runx1	Runt-related transcription factor 1	5.91911	8.8751	0.0739292	-2.07714	-6.27912	0.36715	0.427865
Q61703	Q61703	ITIH2_MOUSE	Itih2	Inter-alpha-trypsin inhibitor heavy chain H2	21.214	10.0504	0.0741867	2.19415	-1.52601	23.8531	0.428686
Q9DBS1	Q9DBS1	TMM43_MOUSE	Tmem43	Transmembrane protein 43	54.806	48.3892	0.074526	2.05705	-0.806343	13.64	0.429975
P21956	P21956	MFGM_MOUSE	Mfge8	Lactadherin	19.0037	15.4887	0.0750139	2.0635	-0.453577	7.48361	0.43159
Q9R020	Q9R020	ZRAB2_MOUSE	Zranb2	Zinc finger Ran-binding domain-containing protein 2	6.17156	10.5966	0.0750389	-2.20727	-9.4841	0.634	0.43159
Q6PHZ2	Q6PHZ2;P28652;Q923T9	KCC2D_MOUSE	Camk2d	Calcium/calmodulin-dependent protein kinase type II subunit delta	43.6431	47.1188	0.075513	-2.03639	-7.40036	0.448828	0.432729
Q9R1P0	Q9R1P0	PSA4_MOUSE	Psma4	Proteasome subunit alpha type-4	207.321	237.399	0.0756018	-2.16391	-64.4439	4.28621	0.432729
P56135	P56135	ATPK_MOUSE	Atp5mf	ATP synthase subunit f, mitochondrial	222.988	269.147	0.0756066	-2.02168	-98.2357	5.9157	0.432729
B2RXV4	B2RXV4	FLVC1_MOUSE	Flvcr1	Feline leukemia virus subgroup C receptor-related protein 1	0	1.21843	0.0757043	-2.23483	-2.6199	0.183051	0.432729
Q8VCS3	Q8VCS3	XYLK_MOUSE	Fam20b	Glycosaminoglycan xylosylkinase	3.183	6.51257	0.0760058	-2.1536	-7.13837	0.47923	0.433784
P62746	P62746	RHOB_MOUSE	Rhob	Rho-related GTP-binding protein RhoB	9.08132	11.9185	0.0762556	-1.97707	-6.03474	0.360475	0.434148
Q91V41	Q91V41	RAB14_MOUSE	Rab14	Ras-related protein Rab-14	90.5119	83.2482	0.0763041	1.98341	-0.929621	15.4571	0.434148
O35855	O35855	BCAT2_MOUSE	Bcat2	Branched-chain-amino-acid aminotransferase, mitochondrial	60.5961	67.6543	0.0765967	-1.99472	-15.0394	0.922905	0.43491
Q99NB1	Q99NB1	ACS2L_MOUSE	Acss1	Acetyl-coenzyme A synthetase 2-like, mitochondrial	9.34843	16.0576	0.0766729	-2.14303	-14.404	0.985644	0.43491
Q8VD31	Q8VD31	TPSNR_MOUSE	Tapbpl	Tapasin-related protein	7.29217	12.6261	0.0768965	-2.08622	-11.4265	0.758567	0.434938
Q76MZ3	Q76MZ3	2AAA_MOUSE	Ppp2r1a	Serine/threonine-protein phosphatase 2A 65 kDa regulatory subunit A alpha isoform	83.3615	96.2863	0.0770688	-2.11289	-27.7378	1.88824	0.434938
P24369	P24369	PPIB_MOUSE	Ppib	Peptidyl-prolyl cis-trans isomerase B	274.602	350.976	0.077074	-2.04216	-163.325	10.5773	0.434938
Q91XI1	Q91XI1	DUS3L_MOUSE	Dus3l	tRNA-dihydrouridine(47) synthase [NAD(P)(+)]-like	13.9607	10.7249	0.0772381	2.09303	-0.469042	6.94054	0.434938
Q8K1L5	Q8K1L5	PP1RB_MOUSE	Ppp1r11	E3 ubiquitin-protein ligase PPP1R11	3.4302	5.301	0.0775785	-1.97429	-3.99197	0.250369	0.434938
O70591	O70591	PFD2_MOUSE	Pfdn2	Prefoldin subunit 2	89.7612	102.64	0.0776143	-2.0751	-27.6271	1.86998	0.434938
Q924Z4	Q924Z4	CERS2_MOUSE	Cers2	Ceramide synthase 2	75.9475	66.5935	0.0776153	2.01059	-1.29144	19.9994	0.434938
Q9D906	Q9D906	ATG7_MOUSE	Atg7	Ubiquitin-like modifier-activating enzyme ATG7	26.981	24.8757	0.0776646	2.01639	-0.292598	4.50323	0.434938
E9QAM5	E9QAM5	HELZ2_MOUSE	Helz2	Helicase with zinc finger domain 2	2.94024	6.0878	0.0779222	-2.00295	-6.73234	0.437213	0.434938
Q9CR41	Q9CR41	HYPK_MOUSE	Hypk	Huntingtin-interacting protein K	6.95615	14.2277	0.0779226	-2.03063	-15.5757	1.03269	0.434938
Q9CZD3	Q9CZD3	GARS_MOUSE	Gars1	Glycine--tRNA ligase	24.724	29.1902	0.0781068	-1.98223	-9.54676	0.614427	0.434938
O89116	O89116	VTI1A_MOUSE	Vti1a	Vesicle transport through interaction with t-SNAREs homolog 1A	3.02394	6.03087	0.0783275	-2.15705	-6.49094	0.477071	0.434938
Q6ZWU9	Q6ZWY3;Q6ZWU9	RS27_MOUSE	Rps27	40S ribosomal protein S27	97.9957	115.278	0.0783669	-1.98325	-36.9682	2.40401	0.434938
Q2TPA8	Q2TPA8	HSDL2_MOUSE	Hsdl2	Hydroxysteroid dehydrogenase-like protein 2	10.1402	15.2985	0.078413	-2.01984	-11.0572	0.740509	0.434938
P63254	P63254	CRIP1_MOUSE	Crip1	Cysteine-rich protein 1	200.595	255.285	0.0785422	-1.96216	-116.908	7.52663	0.434938
P62196	P62196	PRS8_MOUSE	Psmc5	26S proteasome regulatory subunit 8	60.9152	64.8712	0.0786743	-1.96681	-8.46151	0.549376	0.434938
Q9QUJ7	Q9QUJ7	ACSL4_MOUSE	Acsl4	Long-chain-fatty-acid--CoA ligase 4	24.6041	30.1682	0.0786982	-1.95975	-11.897	0.768823	0.434938
Q9D8X1	Q9D8X1	CUTC_MOUSE	Cutc	Copper homeostasis protein cutC homolog	27.5889	33.3534	0.0789093	-1.962	-12.3336	0.804562	0.434938
Q8VDM6	Q8VDM6	HNRL1_MOUSE	Hnrnpul1	Heterogeneous nuclear ribonucleoprotein U-like protein 1	24.1384	21.9383	0.0789532	2.05019	-0.330351	4.73062	0.434938
O70131	O70131	NINJ1_MOUSE	Ninj1	Ninjurin-1	3.19592	6.41702	0.0790262	-2.07988	-6.93841	0.49621	0.434938
Q99K85	Q99K85	SERC_MOUSE	Psat1	Phosphoserine aminotransferase	48.8232	59.8124	0.0793341	-2.03763	-23.6363	1.65791	0.435985
P07724	P07724	ALBU_MOUSE	Alb	Albumin	127.665	44.8454	0.0795926	2.12948	-13.5272	179.166	0.436532
Q80TH2	Q80TH2	ERBIN_MOUSE	Erbin	Erbin	4.17435	8.32118	0.0797768	-2.10765	-8.96485	0.671183	0.436532
Q9WUR2	Q9WUR2	ECI2_MOUSE	Eci2	Enoyl-CoA delta isomerase 2	5.64802	10.1837	0.0798143	-1.98842	-9.74107	0.669741	0.436532
P17515	P17515	CXL10_MOUSE	Cxcl10	C-X-C motif chemokine 10	0	6.05953	0.0799052	-2.1919	-13.1659	1.04687	0.436532
Q8R3Q6	Q8R3Q6	MIX23_MOUSE	Mix23	Protein MIX23	6.8795	9.12726	0.0800913	-1.99797	-4.83352	0.337991	0.436575
P61021	P61021	RAB5B_MOUSE	Rab5b	Ras-related protein Rab-5B	38.7067	44.7887	0.0801488	-1.99746	-13.0801	0.916109	0.436575
Q922J3	Q922J3	CLIP1_MOUSE	Clip1	CAP-Gly domain-containing linker protein 1	18.3776	19.6289	0.0802972	-2.01873	-2.69541	0.192809	0.436741
B2RY56	B2RY56	RBM25_MOUSE	Rbm25	RNA-binding protein 25	19.0062	16.0786	0.0809701	1.98558	-0.45005	6.30522	0.439124
Q64520	Q64520	KGUA_MOUSE	Guk1	Guanylate kinase	16.6185	20.8431	0.0810485	-1.94888	-9.08075	0.631515	0.439124
Q3U7R1	Q3U7R1	ESYT1_MOUSE	Esyt1	Extended synaptotagmin-1	107.247	120.277	0.0811044	-1.97591	-28.0581	1.99684	0.439124
Q18PI6	Q18PI6	SLAF5_MOUSE	Cd84	SLAM family member 5	117.776	99.7612	0.0812095	1.97619	-2.77169	38.8005	0.439124
Q8CI51	Q8CI51	PDLI5_MOUSE	Pdlim5	PDZ and LIM domain protein 5	49.5097	43.8449	0.081418	2.10247	-0.970201	12.2998	0.43961
Q9CXW2	Q9CXW2	RT22_MOUSE	Mrps22	28S ribosomal protein S22, mitochondrial	26.2734	22.047	0.0819414	2.04046	-0.70319	9.15596	0.441792
Q9CQ89	Q9CQ89	CUTA_MOUSE	Cuta	Protein CutA	4.95342	8.68179	0.0820619	-1.99902	-8.05931	0.602571	0.441798
Q00PI9	Q00PI9	HNRL2_MOUSE	Hnrnpul2	Heterogeneous nuclear ribonucleoprotein U-like protein 2	67.5939	64.0043	0.0825493	1.9709	-0.576522	7.75572	0.443661
Q9QYI4	Q9QYI4	DJB12_MOUSE	Dnajb12	DnaJ homolog subfamily B member 12	2.72811	5.42323	0.0826474	-2.0743	-5.86216	0.471916	0.443661
P84102	P84102;O88892	SERF2_MOUSE	Serf2	Small EDRK-rich factor 2	14.7982	9.54026	0.0828708	1.97188	-0.854623	11.3706	0.444216
Q9QUM9	Q9QUM9	PSA6_MOUSE	Psma6	Proteasome subunit alpha type-6	70.3914	79.2142	0.0831433	-1.93089	-19.0433	1.39768	0.445033
P40240	P40240	CD9_MOUSE	Cd9	CD9 antigen	82.5271	58.8798	0.0836771	2.06057	-4.24422	51.539	0.447244
Q01853	Q01853	TERA_MOUSE	Vcp	Transitional endoplasmic reticulum ATPase	159.964	173.188	0.084051	-1.96116	-28.6639	2.21693	0.448595
Q8C754	Q8C754	VPS52_MOUSE	Vps52	Vacuolar protein sorting-associated protein 52 homolog	17.8918	15.9157	0.0841763	1.9482	-0.329015	4.28111	0.448617
Q9CY27	Q9CY27	TECR_MOUSE	Tecr	Very-long-chain enoyl-CoA reductase	28.1266	24.58	0.0843459	1.94074	-0.590041	7.68324	0.448875
P35283	P35283	RAB12_MOUSE	Rab12	Ras-related protein Rab-12	9.42148	14.4974	0.0845265	-1.95359	-11.0108	0.858963	0.449191
P97770	P97770	THUM3_MOUSE	Thumpd3	tRNA (guanine(6)-N2)-methyltransferase THUMP3	14.1807	11.4685	0.0848863	2.04018	-0.498729	5.92298	0.450457
P26039	P26039	TLN1_MOUSE	Tln1	Talin-1	235.042	269.995	0.08527	-1.95829	-75.9911	6.08477	0.451846
Q8K1M6	Q8K1M6	DNM1L_MOUSE	Dnm1l	Dynamin-1-like protein	20.8228	21.7886	0.0859545	-1.93114	-2.09934	0.167877	0.453522
Q3UBX0	Q3UBX0	TM109_MOUSE	Tmem109	Transmembrane protein 109	23.2806	13.0809	0.0860571	2.0386	-1.94559	22.3451	0.453522
P97465	P97465	DOK1_MOUSE	Dok1	Docking protein 1	15.9793	17.8804	0.0861643	-1.94479	-4.13889	0.336656	0.453522
P70271	P70271	PDLI4_MOUSE	Pdlim4	PDZ and LIM domain protein 4	15.9864	11.6045	0.086182	2.03633	-0.83766	9.60143	0.453522
Q9EQU3	Q9EQU3	TLR9_MOUSE	Tlr9	Toll-like receptor 9	10.4578	15.1446	0.0864918	-2.01283	-10.2615	0.887828	0.453522
P50518	P50518	VATE1_MOUSE	Atp6v1e1	V-type proton ATPase subunit E 1	226.429	249.65	0.0865061	-2.04615	-50.962	4.51996	0.453522
P54276	P54276	MSH6_MOUSE	Msh6	DNA mismatch repair protein Msh6	2.29505	5.87018	0.0865583	-1.90883	-7.77136	0.621093	0.453522
Q9CQV4	Q9CQV4	RETR3_MOUSE	Retreg3	Reticulophagy regulator 3	22.6286	18.8897	0.0866804	1.91233	-0.654067	8.1318	0.453522
P27046	P27046	MA2A1_MOUSE	Man2a1	Alpha-mannosidase 2	15.0865	18.1912	0.0870174	-2.01783	-6.80964	0.600328	0.453522
Q9D1E6	Q9D1E6	TBCB_MOUSE	Tbcb	Tubulin-folding cofactor B	23.4952	28.6013	0.0871928	-1.95747	-11.1563	0.944059	0.453522
P56382	P56382	ATP5E_MOUSE	Atp5f1e	ATP synthase subunit epsilon, mitochondrial	102.751	118.913	0.0872138	-1.89937	-35.165	2.84141	0.453522
O09117	O09117	SYPL1_MOUSE	Sypl1	Synaptophysin-like protein 1	23.1603	26.4736	0.0873342	-1.89526	-7.20923	0.582526	0.453522
Q8VE37	Q8VE37	RCC1_MOUSE	Rcc1	Regulator of chromosome condensation	18.0645	13.9642	0.0873869	1.92724	-0.742937	8.94359	0.453522
Q9CQ54	Q9CQ54	NDUC2_MOUSE	Ndufc2	NADH dehydrogenase [ubiquinone] 1 subunit C2	27.9565	22.8177	0.0874694	1.96964	-0.968239	11.2459	0.453522
P29391	P29391	FRIL1_MOUSE	Ftl1	Ferritin light chain 1	403.033	284.719	0.087568	1.93556	-21.7145	258.342	0.453522
E9Q557	E9Q557	DESP_MOUSE	Dsp	Desmoplakin	34.6798	3.81054	0.0875904	2.09294	-6.4455	68.184	0.453522
Q3U1Z5	Q3U1Z5	GPSM3_MOUSE	Gpsm3	G-protein-signaling modulator 3	93.1329	78.0415	0.0877882	2.03938	-3.04079	33.2237	0.453522
Q9CR25	Q9CR25	DPH2_MOUSE	Dph2	2-(3-amino-3-carboxypropyl)histidine synthase subunit 2	1.92485	0	0.0878058	2.1173	-0.412084	4.26179	0.453522
P35235	P35235	PTN11_MOUSE	Ptpn11	Tyrosine-protein phosphatase non-receptor type 11	25.2638	20.3269	0.0879128	2.04948	-1.0066	10.8806	0.453522
P50247	P50247	SAHH_MOUSE	Ahcy	Adenosylhomocysteinase	106.877	114.752	0.0881626	-1.89191	-17.1664	1.41572	0.454179
Q9Z2V5	Q9Z2V5	HDAC6_MOUSE	Hdac6	Histone deacetylase 6	2.33454	3.91784	0.0884184	-2.04453	-3.49313	0.326542	0.454864
Q9JKK7	Q9JKK7	TMOD2_MOUSE	Tmod2	Tropomodulin-2	57.9931	22.9849	0.0886062	2.03467	-7.20435	77.2208	0.455197
P15533	P15533	TR30A_MOUSE	Trim30a	Tripartite motif-containing protein 30A	37.7578	44.9509	0.0887694	-1.93085	-15.7499	1.36349	0.455404
Q9DBH0	Q9DBH0	WWP2_MOUSE	Wwp2	NEDD4-like E3 ubiquitin-protein ligase WWP2	0	2.02441	0.0889523	-2.10707	-4.49415	0.445333	0.455711
B1AVH7	B1AVH7	TBD2A_MOUSE	Tbc1d2	TBC1 domain family member 2A	4.39097	8.56759	0.089717	-2.06269	-9.26163	0.908393	0.457603
Q8C7X2	Q8C7X2	EMC1_MOUSE	Emc1	ER membrane protein complex subunit 1	19.3231	17.7785	0.0897598	1.90055	-0.293475	3.38284	0.457603
O08738	O08738	CASP6_MOUSE	Casp6	Caspase-6	32.2822	42.3949	0.0898203	-1.89859	-22.1468	1.92132	0.457603
Q9D1D4	Q9D1D4	TMEDA_MOUSE	Tmed10	Transmembrane emp24 domain-containing protein 10	66.7425	72.067	0.0901656	-1.90543	-11.6772	1.02814	0.457603
P70315	P70315	WASP_MOUSE	Was	Wiskott-Aldrich syndrome protein homolog	39.9243	35.3181	0.09021	1.87658	-0.867484	10.08	0.457603
Q9JII7	Q9JII7	ZFN2A_MOUSE	Zfand2a	AN1-type zinc finger protein 2A	0	2.74648	0.090217	-2.09594	-6.11492	0.621963	0.457603
Q99LI9	Q99LI9	CLP1_MOUSE	Clp1	Polyribonucleotide 5'-hydroxyl-kinase Clp1	2.68738	5.21908	0.0902827	-2.06879	-5.6259	0.562514	0.457603
P35700	P35700	PRDX1_MOUSE	Prdx1	Peroxiredoxin-1	2081.5	2714.43	0.09031	-1.87936	-1385.71	119.85	0.457603
Q2TBE6	Q2TBE6	P4K2A_MOUSE	Pi4k2a	Phosphatidylinositol 4-kinase type 2-alpha	36.3316	33.0936	0.0905538	1.93411	-0.648621	7.12459	0.45788
P35293	P35293	RAB18_MOUSE	Rab18	Ras-related protein Rab-18	53.4873	57.3286	0.0906118	-1.96482	-8.47417	0.791539	0.45788
P29699	P29699	FETUA_MOUSE	Ahsg	Alpha-2-HS-glycoprotein	11.1013	2.02409	0.0913731	2.01297	-1.99029	20.1446	0.461098
Q9CQ52	Q9CQ52	CEL3B_MOUSE	Cela3b	Chymotrypsin-like elastase family member 3B	3.88949	0	0.0915909	2.08404	-0.908049	8.68702	0.461499
P26151	P26151	FCGR1_MOUSE	Fcgr1	High affinity immunoglobulin gamma Fc receptor I	47.5928	63.4391	0.0917172	-2.00358	-35.1741	3.48151	0.461499
Q8CAY6	Q8CAY6	THIC_MOUSE	Acat2	Acetyl-CoA acetyltransferase, cytosolic	8.49782	10.5384	0.0919626	-1.87463	-4.48435	0.403202	0.461499
Q9DB20	Q9DB20	ATPO_MOUSE	Atp5po	ATP synthase subunit O, mitochondrial	304.846	346.965	0.0920402	-1.88842	-92.6848	8.44712	0.461499
P08228	P08228	SODC_MOUSE	Sod1	Superoxide dismutase [Cu-Zn]	339.741	362.072	0.0924129	-1.9021	-49.2444	4.58203	0.461499
Q9CY62	Q9CY62	RN181_MOUSE	Rnf181	E3 ubiquitin-protein ligase RNF181	5.17138	8.79096	0.0924795	-2.00506	-8.05257	0.813421	0.461499
O70566	O70566	DIAP2_MOUSE	Diaph2	Protein diaphanous homolog 2	3.67083	6.10644	0.0924824	-2.02558	-5.42789	0.556683	0.461499
Q8BWU5	Q8BWU5	OSGEP_MOUSE	Osgep	tRNA N6-adenosine threonylcarbamoyltransferase	24.9717	22.3185	0.0926275	1.87146	-0.532439	5.83877	0.461499
P70398	P70398	USP9X_MOUSE	Usp9x	Probable ubiquitin carboxyl-terminal hydrolase FAF-X	20.3683	16.8389	0.0927021	2.00952	-0.801014	7.85978	0.461499
B2RUJ5	B2RUJ5	APBA1_MOUSE	Apba1	Amyloid-beta A4 precursor protein-binding family A member 1	1.84623	3.92001	0.0927958	-1.87735	-4.56796	0.420396	0.461499
O70325	O70325	GPX4_MOUSE	Gpx4	Phospholipid hydroperoxide glutathione peroxidase	19.3147	16.0344	0.0928232	1.8583	-0.653736	7.2143	0.461499
Q9CQF9	Q9CQF9	PCYOX_MOUSE	Pcyox1	Prenylcysteine oxidase 1	29.6519	23.8226	0.0932298	1.88399	-1.2032	12.8618	0.462899
Q8R0F6	Q8R0F6	ILKAP_MOUSE	Ilkap	Integrin-linked kinase-associated serine/threonine phosphatase 2C	14.5727	24.7066	0.0941264	-2.01975	-22.6795	2.41159	0.46478
Q8BG30	Q8BG30	NELFA_MOUSE	Nelfa	Negative elongation factor A	3.34376	7.72458	0.0943388	-2.01164	-9.80318	1.04154	0.46478
Q99M15	Q99M15	PPIP2_MOUSE	Pstpip2	Proline-serine-threonine phosphatase-interacting protein 2	6.59645	11.1243	0.0943751	-1.92406	-10.0553	0.999592	0.46478
Q9WVQ5	Q9WVQ5	MTNB_MOUSE	Apip	Methylthioribulose-1-phosphate dehydratase	25.4283	30.6992	0.0943764	-1.91107	-11.692	1.15021	0.46478
Q91ZE0	Q91ZE0	TMLH_MOUSE	Tmlhe	Trimethyllysine dioxygenase, mitochondrial	7.26165	12.2818	0.0944149	-1.93028	-11.1559	1.11561	0.46478
P50516	P50516	VATA_MOUSE	Atp6v1a	V-type proton ATPase catalytic subunit A	662.95	753.779	0.094478	-1.87418	-200.872	19.2138	0.46478
Q6Y685	Q6Y685	TACC1_MOUSE	Tacc1	Transforming acidic coiled-coil-containing protein 1	7.10817	5.50949	0.0944869	1.86747	-0.33615	3.5335	0.46478
Q9R060	Q9R060	NUBP1_MOUSE	Nubp1	Cytosolic Fe-S cluster assembly factor NUBP1	4.37416	8.52589	0.0946857	-1.96886	-9.26455	0.961086	0.465141
O08553	O08553	DPYL2_MOUSE	Dpysl2	Dihydropyrimidinase-related protein 2	297.868	333.831	0.094899	-1.90417	-79.8361	7.90843	0.46557
O70311	O70311	NMT2_MOUSE	Nmt2	Glycylpeptide N-tetradecanoyltransferase 2	4.02123	6.76735	0.0951998	-1.9229	-6.11129	0.619044	0.466429
Q3TN34	Q3TN34	MILK2_MOUSE	Micall2	MICAL-like protein 2	0	0.877013	0.0954134	-2.05189	-1.97573	0.2217	0.466858
Q8BZ20	Q8BZ20	PAR12_MOUSE	Parp12	Protein mono-ADP-ribosyltransferase PARP12	0.611375	2.50667	0.0957209	-1.85471	-4.19734	0.406758	0.467182
Q8VBT0	Q8VBT0	TMX1_MOUSE	Tmx1	Thioredoxin-related transmembrane protein 1	12.3894	9.96185	0.0957493	1.91201	-0.549784	5.40494	0.467182
Q8K1R7	Q8K1R7	NEK9_MOUSE	Nek9	Serine/threonine-protein kinase Nek9	14.6702	13.2667	0.0959509	1.84524	-0.300297	3.10733	0.467182
Q69ZK0	Q69ZK0	PREX1_MOUSE	Prex1	Phosphatidylinositol 3,4,5-trisphosphate-dependent Rac exchanger 1 protein	15.1781	12.6341	0.0960827	1.86545	-0.556756	5.64475	0.467182
Q60855	Q60855	RIPK1_MOUSE	Ripk1	Receptor-interacting serine/threonine-protein kinase 1	22.8295	20.6647	0.0961237	1.88902	-0.484802	4.81444	0.467182
O35963	O35963	RB33B_MOUSE	Rab33b	Ras-related protein Rab-33B	47.6474	41.2033	0.0962365	1.95156	-1.53083	14.4191	0.467182
P47791	P47791	GSHR_MOUSE	Gsr	Glutathione reductase, mitochondrial	134.728	153.232	0.0967276	-1.83838	-41.0209	4.01258	0.468612
Q61753	Q61753	SERA_MOUSE	Phgdh	D-3-phosphoglycerate dehydrogenase	91.7465	128.652	0.0968522	-1.91209	-82.4127	8.6008	0.468612
Q05144	Q05144;P60764;P63001	RAC2_MOUSE	Rac2	Ras-related C3 botulinum toxin substrate 2	247.715	308.682	0.0969982	-1.87046	-135.659	13.7249	0.468612
Q99P65	Q99P65	S29A3_MOUSE	Slc29a3	Equilibrative nucleoside transporter 3	8.4877	6.56694	0.0970372	1.95705	-0.468031	4.30955	0.468612
Q6NVF9	Q6NVF9	CPSF6_MOUSE	Cpsf6	Cleavage and polyadenylation specificity factor subunit 6	33.8467	29.9445	0.0972395	1.88971	-0.899853	8.70429	0.468978
P97449	P97449	AMPN_MOUSE	Anpep	Aminopeptidase N	1066.01	1195.82	0.0978408	-1.83037	-288.336	28.7286	0.471265
P01921	P01921	HB2D_MOUSE	H2-Ab1	H-2 class II histocompatibility antigen, A-D beta chain	106.824	178.436	0.0981729	-1.82506	-159.123	15.899	0.471857
Q9D7A6	Q9D7A6	SRP19_MOUSE	Srp19	Signal recognition particle 19 kDa protein	6.56191	11.0711	0.0982187	-1.87823	-10.073	1.05453	0.471857
P68510	P68510	1433F_MOUSE	Ywhah	14-3-3 protein eta	100.945	93.832	0.0984079	1.8407	-1.61277	15.8385	0.472154
Q80TL7	Q80TL7	MON2_MOUSE	Mon2	Protein MON2 homolog	11.9659	8.76912	0.0993019	2.00157	-0.856615	7.25018	0.475387
Q9ET01	Q9ET01	PYGL_MOUSE	Pygl	Glycogen phosphorylase, liver form	17.6591	15.337	0.0993384	1.88004	-0.559264	5.2034	0.475387
Q99M31	Q99M31	HSP7E_MOUSE	Hspa14	Heat shock 70 kDa protein 14	4.35214	8.35881	0.0995613	-1.96994	-9.06517	1.05184	0.475839
Q02053	P31254;Q02053	UBA1_MOUSE	Uba1	Ubiquitin-like modifier-activating enzyme 1	156.336	173.952	0.0999861	-1.96145	-39.8708	4.63877	0.476649
Q91X58	Q91X58	ZFN2B_MOUSE	Zfand2b	AN1-type zinc finger protein 2B	2.462	4.00884	0.0999882	-1.8212	-3.45142	0.357735	0.476649
O35459	O35459	ECH1_MOUSE	Ech1	Delta(3,5)-Delta(2,4)-dienoyl-CoA isomerase, mitochondrial	17.8399	15.0391	0.101232	1.82232	-0.668113	6.26978	0.480722
Q9Z0Y1	Q9Z0Y1	DCTN3_MOUSE	Dctn3	Dynactin subunit 3	11.3842	21.667	0.101308	-1.97234	-23.3879	2.82225	0.480722
P0DN34	P0DN34	NDUB1_MOUSE	Ndufb1	NADH dehydrogenase [ubiquinone] 1 beta subcomplex subunit 1	17.4707	11.9103	0.101412	1.83894	-1.35392	12.4748	0.480722
Q8K1A6	Q8K1A6	C2D1A_MOUSE	Cc2d1a	Coiled-coil and C2 domain-containing protein 1A	19.5957	32.4001	0.101434	-1.93036	-29.0059	3.3972	0.480722
O35609	O35609	SCAM3_MOUSE	Scamp3	Secretory carrier-associated membrane protein 3	31.7563	27.7991	0.101531	1.91007	-1.03323	8.94773	0.480722
P28076	P28076	PSB9_MOUSE	Psmb9	Proteasome subunit beta type-9	58.2917	69.1703	0.101624	-1.82638	-24.3868	2.62968	0.480722
Q91Z67	Q91Z69;Q91Z67	SRGP2_MOUSE	Srgap2	SLIT-ROBO Rho GTPase-activating protein 2	30.4516	28.2235	0.101751	1.80182	-0.527195	4.98343	0.480722
Q99MK8	Q99MK8	ARBK1_MOUSE	Grk2	Beta-adrenergic receptor kinase 1	26.9968	23.3028	0.102004	1.80204	-0.879455	8.26745	0.480898
P70122	P70122	SBDS_MOUSE	Sbds	Ribosome maturation protein SBDS	43.6204	50.5984	0.102175	-1.80888	-15.6354	1.67942	0.480898
Q60780	Q60780	GAS7_MOUSE	Gas7	Growth arrest-specific protein 7	25.4336	30.7369	0.102287	-1.82473	-11.9065	1.30001	0.480898
Q8K3G9	Q8K3G9	DP13B_MOUSE	Appl2	DCC-interacting protein 13-beta	13.4589	10.6457	0.102406	1.86827	-0.721237	6.34751	0.480898
Q99LB2	Q99LB2	DHRS4_MOUSE	Dhrs4	Dehydrogenase/reductase SDR family member 4	21.991	24.5912	0.102448	-1.80876	-5.83021	0.629746	0.480898
Q61171	Q61171	PRDX2_MOUSE	Prdx2	Peroxiredoxin-2	182.29	205.104	0.102567	-1.8537	-51.419	5.7903	0.480898
Q02819	Q02819	NUCB1_MOUSE	Nucb1	Nucleobindin-1	40.0742	31.1293	0.103281	1.80514	-2.20059	20.0904	0.482056
Q9D0B6	Q9D0B6	PBDC1_MOUSE	Pbdc1	Protein PBDC1	33.5947	39.6569	0.10342	-1.79734	-13.6088	1.48445	0.482056
A2AF47	A2AF47	DOC11_MOUSE	Dock11	Dedicator of cytokinesis protein 11	0	1.36891	0.103534	-1.98785	-3.13912	0.401295	0.482056
Q3ULW8	Q3ULW8	PARP3_MOUSE	Parp3	Protein mono-ADP-ribosyltransferase PARP3	2.67948	5.74685	0.103614	-1.79078	-6.8842	0.749456	0.482056
Q6P2B1	Q6P2B1	TNPO3_MOUSE	Tnpo3	Transportin-3	5.20318	8.72639	0.103792	-1.87956	-7.98925	0.942839	0.482056
P04918	P04918	SAA3_MOUSE	Saa3	Serum amyloid A-3 protein	18.1731	75.1191	0.103812	-1.9802	-130.583	16.6915	0.482056
Q9DB90	Q9DB90	SMG9_MOUSE	Smg9	Nonsense-mediated mRNA decay factor SMG9	3.45687	5.78275	0.104043	-1.90201	-5.29101	0.639248	0.482056
Q9Z2R6	Q8C4B4;Q9Z2R6	U119A_MOUSE	Unc119	Protein unc-119 homolog A	5.64203	10.6892	0.104159	-1.93128	-11.5226	1.4284	0.482056
P01895	P01895	HA1Y_MOUSE	H2-D1	H-2 class I histocompatibility antigen, alpha chain (Fragment)	18.7196	40.7688	0.104203	-1.78728	-49.5392	5.44073	0.482056
P70704	P70704;P98200	AT8A1_MOUSE	Atp8a1	Phospholipid-transporting ATPase IA	12.5021	10.8983	0.104267	1.87759	-0.433078	3.64067	0.482056
Q9D771	Q9D771	PACC1_MOUSE	Pacc1	Proton-activated chloride channel	3.38659	5.70362	0.10451	-1.81734	-5.22753	0.593466	0.482056
O88384	O88384	VTI1B_MOUSE	Vti1b	Vesicle transport through interaction with t-SNAREs homolog 1B	46.9115	41.8774	0.104514	1.78684	-1.25042	11.3186	0.482056
Q6VN19	Q6VN19	RBP10_MOUSE	Ranbp10	Ran-binding protein 10	11.8638	9.31361	0.104556	1.95289	-0.742518	5.843	0.482056
Q9EQQ2	Q9EQQ2	YIPF5_MOUSE	Yipf5	Protein YIPF5	2.79089	4.70156	0.104636	-1.931	-4.36788	0.546551	0.482056
Q61554	Q61554	FBN1_MOUSE	Fbn1	Fibrillin-1	23.2559	8.33293	0.104848	1.87739	-4.08252	33.9285	0.48243
P30355	P30355	AL5AP_MOUSE	Alox5ap	Arachidonate 5-lipoxygenase-activating protein	368.684	319.31	0.105056	1.78706	-12.4174	111.165	0.482787
Q99KX1	Q99KX1	MLF2_MOUSE	Mlf2	Myeloid leukemia factor 2	2.83046	5.87666	0.105304	-1.81794	-6.8872	0.794807	0.48333
P32233	P32233	DRG1_MOUSE	Drg1	Developmentally-regulated GTP-binding protein 1	22.2086	20.1767	0.105541	1.78747	-0.516805	4.58057	0.483504
Q8BGH2	Q8BGH2	SAM50_MOUSE	Samm50	Sorting and assembly machinery component 50 homolog	27.9844	25.1818	0.105603	1.80244	-0.724783	6.32992	0.483504
Q61510	Q61510	TRI25_MOUSE	Trim25	E3 ubiquitin/ISG15 ligase TRIM25	22.9271	19.1731	0.105889	1.79549	-0.97017	8.47824	0.484211
Q8BRF7	Q8BRF7	SCFD1_MOUSE	Scfd1	Sec1 family domain-containing protein 1	16.485	18.0276	0.106089	-1.81246	-3.49256	0.407357	0.484528
Q9WTP6	Q9WTP6	KAD2_MOUSE	Ak2	Adenylate kinase 2, mitochondrial	58.7215	63.7853	0.106779	-1.78965	-11.4542	1.32669	0.48708
Q9CQ10	Q9CQ10	CHMP3_MOUSE	Chmp3	Charged multivesicular body protein 3	17.5421	14.7951	0.107443	1.76877	-0.714621	6.20862	0.488818
Q9JII6	Q9JII6	AK1A1_MOUSE	Akr1a1	Aldo-keto reductase family 1 member A1	577.902	724.571	0.107528	-1.77051	-331.633	38.2949	0.488818
Q6PDI5	Q6PDI5	ECM29_MOUSE	Ecpas	Proteasome adapter and scaffold protein ECM29	650.652	418.158	0.107591	1.95019	-72.2807	537.268	0.488818
Q80ZJ1	Q80ZJ1	RAP2A_MOUSE	Rap2a	Ras-related protein Rap-2a	15.9788	23.0411	0.107688	-1.81605	-16.063	1.93854	0.488818
Q9CRC9	Q9CRC9	GNPI2_MOUSE	Gnpda2	Glucosamine-6-phosphate isomerase 2	8.05851	9.98499	0.10797	-1.7751	-4.36323	0.510268	0.488973
Q8R480	Q8R480	NUP85_MOUSE	Nup85	Nuclear pore complex protein Nup85	31.8311	39.9143	0.107986	-1.9051	-18.5996	2.43321	0.488973
P70336	P70336	ROCK2_MOUSE	Rock2	Rho-associated protein kinase 2	3.92635	6.46318	0.108229	-1.84619	-5.79955	0.725882	0.489476
Q3UQN2	Q3UQN2	FCHO2_MOUSE	Fcho2	F-BAR domain only protein 2	20.3057	17.8744	0.108661	1.76879	-0.64931	5.51178	0.490829
Q9Z2H5	Q9Z2H5	E41L1_MOUSE	Epb41l1	Band 4.1-like protein 1	19.4661	16.6178	0.108948	1.79312	-0.784922	6.48159	0.491526
E9Q784	E9Q784	ZC3HD_MOUSE	Zc3h13	Zinc finger CCCH domain-containing protein 13	2.67882	5.03964	0.109138	-1.89513	-5.4435	0.721857	0.491672
Q9R0P3	Q9R0P3	ESTD_MOUSE	Esd	S-formylglutathione hydrolase	585.488	738.815	0.109246	-1.80797	-349.822	43.1697	0.491672
Q8K385	Q8K385	FRRS1_MOUSE	FRRS1	Ferric-chelate reductase 1	32.0538	23.9021	0.109544	1.84418	-2.39455	18.698	0.492418
Q99LU0	Q99LU0;Q9CQD4	CH1B1_MOUSE	Chmp1b1	Charged multivesicular body protein 1b-1	30.7132	34.738	0.110028	-1.78094	-9.17011	1.12064	0.493993
O88696	O88696	CLPP_MOUSE	Clpp	ATP-dependent Clp protease proteolytic subunit, mitochondrial	17.2608	15.658	0.110345	1.77649	-0.447181	3.65275	0.494815
Q9DBJ1	Q9DBJ1	PGAM1_MOUSE	Pgam1	Phosphoglycerate mutase 1	825.143	947.644	0.110534	-1.77968	-279.43	34.4277	0.495063
Q3UQ84	Q3UQ84	SYTM_MOUSE	Tars2	Threonine--tRNA ligase, mitochondrial	12.7216	11.0305	0.110875	1.74906	-0.463459	3.84568	0.495994
Q8BTZ7	Q8BTZ7	GMPPB_MOUSE	Gmppb	Mannose-1-phosphate guanyltransferase beta	33.2961	36.9042	0.111133	-1.78582	-8.24953	1.03333	0.496544
P60897	P60897	SEM1_MOUSE	Sem1	26S proteasome complex subunit SEM1	3.61727	6.59788	0.111831	-1.80734	-6.84663	0.885389	0.499062
Q91W59	Q91W59;Q8BWL5	RBMS1_MOUSE	Rbms1	RNA-binding motif, single-stranded-interacting protein 1	18.648	13.7936	0.112144	1.8737	-1.5496	11.2585	0.499858
Q9EPR4	Q9EPR4	S23A2_MOUSE	Slc23a2	Solute carrier family 23 member 2	11.0258	16.4145	0.112377	-1.83106	-12.4354	1.65793	0.499943
P07356	P07356	ANXA2_MOUSE	Anxa2	Annexin A2	615.678	706.783	0.112505	-1.74098	-207.807	25.5964	0.499943
Q80W47	Q80W47	WIPI2_MOUSE	Wipi2	WD repeat domain phosphoinositide-interacting protein 2	1.02987	3.94239	0.112686	-1.74821	-6.65277	0.827723	0.499943
Q8BGH7	Q8BGH7	C42S2_MOUSE	Cdc42se2	CDC42 small effector protein 2	4.5366	8.57179	0.112703	-1.82953	-9.31829	1.24792	0.499943
Q9R1P1	Q9R1P1	PSB3_MOUSE	Psmb3	Proteasome subunit beta type-3	66.4315	78.5157	0.113088	-1.79137	-27.792	3.6235	0.501048
Q9CX34	Q9CX34	SGT1_MOUSE	Sugt1	Protein SGT1 homolog	20.1332	22.9069	0.113634	-1.74816	-6.35092	0.803516	0.502869
P80316	P80316	TCPE_MOUSE	Cct5	T-complex protein 1 subunit epsilon	83.4697	95.8657	0.113983	-1.8271	-28.7171	3.92513	0.503811
P43406	P43406	ITAV_MOUSE	Itgav	Integrin alpha-V	51.9695	45.6389	0.11588	1.81156	-2.04954	14.7108	0.511232
Q8K215	Q8K215	LYRM4_MOUSE	Lyrm4	LYR motif-containing protein 4	29.2797	26.5998	0.115938	1.73121	-0.797908	6.15781	0.511232
Q9D880	Q9D880	TIM50_MOUSE	Timm50	Mitochondrial import inner membrane translocase subunit TIM50	27.1558	25.2212	0.116208	1.73053	-0.578618	4.44782	0.511814
P03911	P03911	NU4M_MOUSE	Mtnd4	NADH-ubiquinone oxidoreductase chain 4	13.1538	10.2891	0.116458	1.79647	-0.92364	6.65309	0.512303
Q9CWS4	Q9CWS4	INT11_MOUSE	Ints11	Integrator complex subunit 11	4.25896	7.07784	0.11818	-1.78518	-6.56658	0.928817	0.519078
P09450	P09450	JUNB_MOUSE	Junb	Transcription factor JunB	1.29676	4.23047	0.118278	-1.75309	-6.80343	0.936014	0.519078
Q6ZPR5	Q6ZPR5	NSMA3_MOUSE	Smpd4	Sphingomyelin phosphodiesterase 4	1.43214	3.01515	0.11847	-1.70785	-3.64831	0.48229	0.519303
Q9WTL7	Q9WTL7	LYPA2_MOUSE	Lypla2	Acyl-protein thioesterase 2	45.3173	54.0325	0.119088	-1.74292	-20.2234	2.793	0.520797
Q9QY36	Q3UX61;Q9QY36	NAA10_MOUSE	Naa10	N-alpha-acetyltransferase 10	8.77837	14.1733	0.119091	-1.81778	-12.6608	1.87096	0.520797
Q6P8U6	Q6P8U6	LIPP_MOUSE	Pnlip	Pancreatic triacylglycerol lipase	29.5228	3.82045	0.119685	1.85258	-9.33555	60.7403	0.522218
P50136	P50136	ODBA_MOUSE	Bckdha	2-oxoisovalerate dehydrogenase subunit alpha, mitochondrial	19.2615	14.3747	0.119955	1.84588	-1.7723	11.5458	0.522218
Q08879	Q08879	FBLN1_MOUSE	Fbln1	Fibulin-1	9.70688	5.28873	0.120165	1.83475	-1.59098	10.4273	0.522218
P80314	P80314	TCPB_MOUSE	Cct2	T-complex protein 1 subunit beta	108.244	113.698	0.120427	-1.72584	-12.6673	1.75927	0.522218
Q8VH51	Q8VH51	RBM39_MOUSE	Rbm39	RNA-binding protein 39	40.394	44.0554	0.120465	-1.77872	-8.57426	1.25152	0.522218
Q8R5L3	Q8R5L3	VPS39_MOUSE	Vps39	Vam6/Vps39-like protein	23.7096	20.2313	0.120516	1.75445	-1.1596	8.1162	0.522218
O35654	O35654	DPOD2_MOUSE	Pold2	DNA polymerase delta subunit 2	3.92935	7.23139	0.120519	-1.86205	-7.83402	1.22995	0.522218
P13020	P13020	GELS_MOUSE	Gsn	Gelsolin	245.513	264.048	0.120544	-1.72679	-43.0663	5.99796	0.522218
Q99MB1	Q99MB1	TLR3_MOUSE	Tlr3	Toll-like receptor 3	13.9524	15.4453	0.120985	-1.73611	-3.47791	0.492147	0.523513
Q9R1T4	Q9R1T4	SEPT6_MOUSE	Septin6	Septin-6	9.44136	13.2764	0.121293	-1.82077	-9.061	1.39086	0.524236
P62996	P62996	TRA2B_MOUSE	Tra2b	Transformer-2 protein homolog beta	24.4381	16.9488	0.121503	1.75549	-2.54614	17.5247	0.52453
Q64514	Q64514	TPP2_MOUSE	Tpp2	Tripeptidyl-peptidase 2	27.5987	29.8653	0.121692	-1.78739	-5.33314	0.800041	0.524736
Q62035	Q62035	PTAFR_MOUSE	Ptafr	Platelet-activating factor receptor	6.39307	10.2881	0.121868	-1.77678	-9.15412	1.36398	0.524881
Q8BGB7	Q8BGB7	ENOPH_MOUSE	Enoph1	Enolase-phosphatase E1	2.94762	5.46883	0.122317	-1.78095	-5.93662	0.894207	0.525731
Q5DTY9	Q50H33;Q5DTY9	KCD16_MOUSE	Kctd16	BTB/POZ domain-containing protein KCTD16	3.54254	6.47268	0.122349	-1.69346	-6.80462	0.944334	0.525731
P61982	P61982	1433G_MOUSE	Ywhag	14-3-3 protein gamma	443.177	486.887	0.122878	-1.74864	-102.549	15.1295	0.527394
Q61599	Q61599	GDIR2_MOUSE	Arhgdib	Rho GDP-dissociation inhibitor 2	146.612	194.096	0.1232	-1.68345	-110.332	15.3648	0.528164
Q5FWK3	Q5FWK3	RHG01_MOUSE	Arhgap1	Rho GTPase-activating protein 1	36.0934	33.5101	0.123497	1.7583	-0.913904	6.08054	0.528525
Q8BJ71	Q8BJ71	NUP93_MOUSE	Nup93	Nuclear pore complex protein Nup93	23.9364	22.5724	0.123684	1.71315	-0.460641	3.18867	0.528525
Q7TPW1	Q7TPW1	NEXN_MOUSE	Nexn	Nexilin	5.38842	11.5364	0.123712	-1.70824	-14.3619	2.06582	0.528525
P18052	P18052	PTPRA_MOUSE	Ptpra	Receptor-type tyrosine-protein phosphatase alpha	41.0239	34.9686	0.123887	1.80637	-2.27028	14.381	0.528661
Q3UM29	Q3UM29	COG7_MOUSE	Cog7	Conserved oligomeric Golgi complex subunit 7	5.7519	10.537	0.124293	-1.83259	-11.4268	1.85665	0.529594
Q52KI8	Q52KI8	SRRM1_MOUSE	Srrm1	Serine/arginine repetitive matrix protein 1	13.0361	9.52794	0.124392	1.68049	-1.15592	8.17229	0.529594
Q9JHJ3	Q9JHJ3	GLMP_MOUSE	Glmp	Glycosylated lysosomal membrane protein	30.6076	26.134	0.124797	1.70429	-1.52605	10.4732	0.530712
P99029	P99029	PRDX5_MOUSE	Prdx5	Peroxiredoxin-5, mitochondrial	345.779	435.009	0.125268	-1.8017	-212.598	34.1382	0.531499
P31001	P31001	DESM_MOUSE	Des	Desmin	0	2.80632	0.125276	-1.8392	-6.72859	1.11596	0.531499
Q64521	Q64521	GPDM_MOUSE	Gpd2	Glycerol-3-phosphate dehydrogenase, mitochondrial	46.2501	51.4625	0.125487	-1.75301	-12.3254	1.9007	0.531499
P03995	P03995	GFAP_MOUSE	Gfap	Glial fibrillary acidic protein	657.986	224.905	0.125717	1.82954	-171.905	1038.07	0.531499
P48962	P48962	ADT1_MOUSE	Slc25a4	ADP/ATP translocase 1	55.3377	62.9081	0.125804	-1.69546	-17.7437	2.60293	0.531499
Q9WTX2	Q9WTX2	PRKRA_MOUSE	Prkra	Interferon-inducible double-stranded RNA-dependent protein kinase activator A	6.64069	5.75044	0.125885	1.67377	-0.298905	2.07941	0.531499
O35382	O35382	EXOC4_MOUSE	Exoc4	Exocyst complex component 4	16.7072	15.0349	0.125987	1.67154	-0.561062	3.90583	0.531499
P47740	P47740	AL3A2_MOUSE	Aldh3a2	Aldehyde dehydrogenase family 3 member A2	32.3748	26.7459	0.12645	1.70495	-1.97908	13.2368	0.532844
O08599	O08599	STXB1_MOUSE	Stxbp1	Syntaxin-binding protein 1	12.5127	14.3601	0.126831	-1.71597	-4.35701	0.662174	0.533172
Q8BX90	Q8BX90	FND3A_MOUSE	Fndc3a	Fibronectin type-III domain-containing protein 3A	7.75812	11.3213	0.126917	-1.80931	-8.54174	1.41536	0.533172
P10833	P10833	RRAS_MOUSE	Rras	Ras-related protein R-Ras	34.5782	30.0898	0.126959	1.66565	-1.52122	10.498	0.533172
Q7TPR4	Q7TPR4	ACTN1_MOUSE	Actn1	Alpha-actinin-1	108.323	91.6715	0.127184	1.67066	-5.69966	39.0031	0.533343
P11688	P11688	ITA5_MOUSE	Itga5	Integrin alpha-5	33.7619	38.4846	0.127436	-1.71853	-11.1614	1.71591	0.533343
Q8BT51	Q8BT51	COA4_MOUSE	COA4	Cytochrome c oxidase assembly factor 4 homolog, mitochondrial	2.95832	4.86616	0.127498	-1.69733	-4.49303	0.67735	0.533343
O55029	O55029	COPB2_MOUSE	Copb2	Coatomer subunit beta'	128.454	118.586	0.127576	1.66217	-3.36693	23.1029	0.533343
Q9DBL9	Q9DBL9	ABHD5_MOUSE	Abhd5	1-acylglycerol-3-phosphate O-acyltransferase ABHD5	4.45481	8.15333	0.127831	-1.80592	-8.88492	1.48788	0.533393
Q8R2Q4	Q8R2Q4	RRF2M_MOUSE	Gfm2	Ribosome-releasing factor 2, mitochondrial	1.79873	3.79767	0.128005	-1.66075	-4.68388	0.685993	0.533393
Q80VA0	Q80VA0	GALT7_MOUSE	Galnt7	N-acetylgalactosaminyltransferase 7	24.3072	34.3361	0.128071	-1.74433	-23.8501	3.79235	0.533393
P56480	P56480	ATPB_MOUSE	Atp5f1b	ATP synthase subunit beta, mitochondrial	750.344	789.761	0.128261	-1.67092	-92.5855	13.7522	0.533393
Q99K48	Q99K48	NONO_MOUSE	Nono	Non-POU domain-containing octamer-binding protein	73.6473	79.0204	0.12842	-1.67053	-12.6253	1.87899	0.533393
P08030	P08030	APT_MOUSE	Aprt	Adenine phosphoribosyltransferase	162.207	195.852	0.128525	-1.72767	-79.8793	12.5886	0.533393
Q62465	Q62465	VAT1_MOUSE	Vat1	Synaptic vesicle membrane protein VAT-1 homolog	1004.96	1154.57	0.128759	-1.65642	-350.971	51.7505	0.533393
O55125	O55125	NIPS1_MOUSE	Nipsnap1	Protein NipSnap homolog 1	27.918	31.3265	0.128784	-1.78239	-8.17727	1.3602	0.533393
Q6GQT1	Q6GQT1	A2MG_MOUSE	A2m	Alpha-2-macroglobulin-P	37.582	22.2064	0.128884	1.80778	-6.31361	37.0649	0.533393
Q9CPV4	Q9CPV4	GLOD4_MOUSE	Glod4	Glyoxalase domain-containing protein 4	25.1852	28.2239	0.129213	-1.66551	-7.14839	1.07092	0.53344
Q80YD1	Q80YD1	SUV3_MOUSE	Supv3l1	ATP-dependent RNA helicase SUPV3L1, mitochondrial	44.0636	34.3201	0.129346	1.75159	-3.79765	23.2848	0.53344
Q8BGG7	Q8BGG7	UBS3B_MOUSE	Ubash3b	Ubiquitin-associated and SH3 domain-containing protein B	4.3921	7.97686	0.129573	-1.78456	-8.62327	1.45375	0.53344
P27870	Q9R0C8;P27870	VAV_MOUSE	Vav1	Proto-oncogene vav	43.9428	40.5362	0.130022	1.72028	-1.29729	8.11049	0.53344
Q80WC7	Q80WC7	AGFG2_MOUSE	Agfg2	Arf-GAP domain and FG repeat-containing protein 2	6.90195	10.1129	0.130346	-1.65505	-7.56133	1.13948	0.53344
P10649	P10649	GSTM1_MOUSE	Gstm1	Glutathione S-transferase Mu 1	277.447	242.712	0.130366	1.64803	-12.2269	81.6966	0.53344
P01900	P01895;P01900	HA12_MOUSE	H2-D1	H-2 class I histocompatibility antigen, D-D alpha chain	786.044	885.663	0.130373	-1.75126	-238.749	39.5103	0.53344
Q9QY06	Q9QY06	MYO9B_MOUSE	Myo9b	Unconventional myosin-IXb	14.4828	12.6827	0.130519	1.67617	-0.657009	4.25714	0.53344
P18242	P18242	CATD_MOUSE	Ctsd	Cathepsin D	940.67	768.259	0.130567	1.67292	-62.7392	407.562	0.53344
Q9CPT4	Q9CPT4	MYDGF_MOUSE	Mydgf	Myeloid-derived growth factor	36.8672	44.4742	0.130568	-1.65691	-17.9299	2.71587	0.53344
Q99NB9	Q99NB9	SF3B1_MOUSE	Sf3b1	Splicing factor 3B subunit 1	16.5301	14.1221	0.130682	1.73859	-0.946741	5.76267	0.53344
Q810D6	Q810D6	GRWD1_MOUSE	Grwd1	Glutamate-rich WD repeat-containing protein 1	2.77613	6.61372	0.130757	-1.64928	-9.03713	1.36193	0.53344
O88947	O88947	FA10_MOUSE	F10	Coagulation factor X	0.552128	3.36165	0.130961	-1.73581	-6.72553	1.10649	0.53344
P62317	P62317	SMD2_MOUSE	Snrpd2	Small nuclear ribonucleoprotein Sm D2	48.3202	30.5656	0.13111	1.75171	-7.13505	42.6443	0.53344
Q6P9J9	Q6P9J9	ANO6_MOUSE	Ano6	Anoctamin-6	14.5963	15.8416	0.131297	-1.65423	-2.93937	0.448708	0.53344
O08539	O08539	BIN1_MOUSE	Bin1	Myc box-dependent-interacting protein 1	36.9255	29.7031	0.131569	1.64904	-2.59796	17.0427	0.53344
Q91VM9	Q91VM9	IPYR2_MOUSE	Ppa2	Inorganic pyrophosphatase 2, mitochondrial	0.969375	3.34471	0.131628	-1.64344	-5.60017	0.849495	0.53344
Q8CCS6	Q8CCS6	PABP2_MOUSE	Pabpn1	Polyadenylate-binding protein 2	38.6375	30.7919	0.13186	1.68144	-2.94788	18.6391	0.53344
Q9CYA0	Q9CYA0	CREL2_MOUSE	Creld2	Protein disulfide isomerase Creld2	18.8258	26.9159	0.132034	-1.6976	-19.287	3.1068	0.53344
Q08874	Q08874	MITF_MOUSE	Mitf	Microphthalmia-associated transcription factor	24.5695	20.9824	0.132108	1.64587	-1.29712	8.47145	0.53344
Q91VC3	Q91VC3	IF4A3_MOUSE	Eif4a3	Eukaryotic initiation factor 4A-III	113.574	105.586	0.132578	1.7009	-3.10755	19.0824	0.53344
P63001	P63001	RAC1_MOUSE	Rac1	Ras-related C3 botulinum toxin substrate 1	168.639	212.56	0.132606	-1.67851	-104.495	16.6542	0.53344
Q9D7I5	Q9D7I5	LHPP_MOUSE	Lhpp	Phospholysine phosphohistidine inorganic pyrophosphate phosphatase	18.3116	13.8411	0.13263	1.64336	-1.62577	10.5667	0.53344
Q78PG9	Q78PG9	CCD25_MOUSE	Ccdc25	Coiled-coil domain-containing protein 25	4.2991	8.92708	0.132689	-1.63724	-10.9281	1.67218	0.53344
Q8BGE6	Q8BGE6	ATG4B_MOUSE	Atg4b	Cysteine protease ATG4B	2.11055	4.2161	0.132732	-1.63799	-4.97313	0.762027	0.53344
Q80ZM7	Q80ZM7	T2AG_MOUSE	Gtf2a2	Transcription initiation factor IIA subunit 2	0.939601	2.33432	0.132943	-1.65309	-3.3054	0.515951	0.53344
Q8BG32	Q8BG32	PSD11_MOUSE	Psmd11	26S proteasome non-ATPase regulatory subunit 11	40.6857	44.8115	0.132949	-1.63627	-9.74681	1.49541	0.53344
Q921F4	Q921F4	HNRLL_MOUSE	Hnrnpll	Heterogeneous nuclear ribonucleoprotein L-like	26.9767	23.5254	0.133066	1.66389	-1.2961	8.19866	0.53344
Q8CC88	Q8CC88	VWA8_MOUSE	Vwa8	von Willebrand factor A domain-containing protein 8	14.6659	13.1303	0.133072	1.75098	-0.637565	3.70876	0.53344
Q7TNV0	Q7TNV0	DEK_MOUSE	Dek	Protein DEK	43.467	38.6614	0.133519	1.65665	-1.80263	11.4138	0.534653
Q9ES00	Q9ES00	UBE4B_MOUSE	Ube4b	Ubiquitin conjugation factor E4 B	8.66961	6.26356	0.133831	1.69	-0.943935	5.75603	0.535325
Q60634	Q60634	FLOT2_MOUSE	Flot2	Flotillin-2	3.58401	5.74085	0.134095	-1.71973	-5.19327	0.879601	0.535549
Q9D023	Q9D023	MPC2_MOUSE	Mpc2	Mitochondrial pyruvate carrier 2	6.27497	8.81769	0.134176	-1.67815	-6.07483	0.989403	0.535549
P35585	P35585	AP1M1_MOUSE	Ap1m1	AP-1 complex subunit mu-1	30.1413	28.2209	0.134622	1.68699	-0.760715	4.60158	0.536731
Q9JJA4	Q9JJA4	WDR12_MOUSE	Wdr12	Ribosome biogenesis protein WDR12	6.51236	10.5697	0.134762	-1.71441	-9.77763	1.66303	0.536731
Q8BL80	Q8BL80	RHG22_MOUSE	Arhgap22	Rho GTPase-activating protein 22	10.154	11.3715	0.135074	-1.63126	-2.88917	0.454276	0.537128
P50637	P50637	TSPO_MOUSE	Tspo	Translocator protein	5.28032	8.88147	0.135296	-1.63901	-8.56389	1.36159	0.537128
P45376	P45376	ALDR_MOUSE	Akr1b1	Aldo-keto reductase family 1 member B1	231.885	252.081	0.135725	-1.68301	-48.5001	8.10879	0.537128
P18469	P18468;P04231;P20040;P04230;P01915;P18469	HB2J_MOUSE	H2-Eb1	H-2 class II histocompatibility antigen, I-E beta chain	9.08078	16.5996	0.136048	-1.68422	-18.0771	3.03938	0.537128
P08905	P17897;P08905	LYZ2_MOUSE	Lyz2	Lysozyme C-2	1334.35	1116.73	0.136136	1.62325	-81.8057	517.043	0.537128
Q9JKP5	Q9JKP5;Q8C181	MBNL1_MOUSE	Mbnl1	Muscleblind-like protein 1	47.8188	55.9488	0.13634	-1.62138	-19.3192	3.0592	0.537128
Q8VDJ3	Q8VDJ3	VIGLN_MOUSE	Hdlbp	Vigilin	58.5677	50.7415	0.136353	1.62391	-2.95485	18.6073	0.537128
Q64433	Q64433	CH10_MOUSE	Hspe1	10 kDa heat shock protein, mitochondrial	108.438	124.394	0.136515	-1.66502	-38.2625	6.35203	0.537128
P58681	P58681	TLR7_MOUSE	Tlr7	Toll-like receptor 7	17.4704	19.273	0.136553	-1.62332	-4.2875	0.682303	0.537128
O70305	O70305	ATX2_MOUSE	Atxn2	Ataxin-2	3.96016	5.96364	0.136678	-1.62945	-4.77264	0.765695	0.537128
Q64455	Q64455	PTPRJ_MOUSE	Ptprj	Receptor-type tyrosine-protein phosphatase eta	27.7357	32.8634	0.136928	-1.61813	-12.1955	1.94006	0.537128
Q9CXL3	Q9CXL3	CG050_MOUSE		Uncharacterized protein C7orf50 homolog	5.0294	1.65354	0.137078	1.64815	-1.32889	8.08062	0.537128
Q9D8N0	Q9D8N0	EF1G_MOUSE	Eef1g	Elongation factor 1-gamma	114.094	126.11	0.137252	-1.74399	-29.3393	5.30704	0.537128
Q9CPZ8	Q9CPZ8	COXM1_MOUSE	Cmc1	COX assembly mitochondrial protein homolog	6.7225	6.03814	0.137457	1.64102	-0.2687	1.63743	0.537128
Q05117	Q05117	PPA5_MOUSE	Acp5	Tartrate-resistant acid phosphatase type 5	103.066	135.809	0.137463	-1.69369	-79.1849	13.6978	0.537128
Q63850	Q63850	NUP62_MOUSE	Nup62	Nuclear pore glycoprotein p62	23.3451	26.4074	0.137517	-1.61854	-7.29474	1.17028	0.537128
Q9D6Z1	Q9D6Z1	NOP56_MOUSE	Nop56	Nucleolar protein 56	47.6107	40.8205	0.13765	1.64783	-2.69676	16.2771	0.537128
Q8BH02	Q8BH02	TOR4A_MOUSE	Tor4a	Torsin-4A	11.9408	5.9802	0.137655	1.61429	-2.27083	14.192	0.537128
Q61655	Q61655	DD19A_MOUSE	Ddx19a	ATP-dependent RNA helicase DDX19A	35.7396	39.5328	0.137663	-1.67691	-9.14706	1.5607	0.537128
Q9D379	Q9D379	HYEP_MOUSE	Ephx1	Epoxide hydrolase 1	56.5255	64.2734	0.137803	-1.75463	-18.9901	3.49424	0.537128
Q91X52	Q91X52	DCXR_MOUSE	Dcxr	L-xylulose reductase	23.0195	27.1243	0.137907	-1.61677	-9.78459	1.57509	0.537128
P20491	P20491	FCERG_MOUSE	Fcer1g	High affinity immunoglobulin epsilon receptor subunit gamma	240.194	281.834	0.138551	-1.62764	-99.6455	16.3658	0.538456
O35405	O35405	PLD3_MOUSE	Pld3	5'-3' exonuclease PLD3	215.288	171.719	0.138675	1.72698	-19.3191	106.456	0.538456
Q3TL44	Q3TL44	NLRX1_MOUSE	Nlrx1	NLR family member X1	9.21164	13.3215	0.138684	-1.73133	-10.0515	1.83175	0.538456
Q9ER00	Q9ER00	STX12_MOUSE	Stx12	Syntaxin-12	39.2154	33.5386	0.138855	1.68955	-2.41716	13.7707	0.538495
Q8BMP6	Q8BMP6	GCP60_MOUSE	Acbd3	Golgi resident protein GCP60	34.8674	42.2278	0.139256	-1.63705	-17.6812	2.96019	0.538495
Q9CR51	Q9CR51	VATG1_MOUSE	Atp6v1g1	V-type proton ATPase subunit G 1	17.3359	19.7551	0.139295	-1.61667	-5.78729	0.949021	0.538495
Q99JI4	Q99JI4	PSMD6_MOUSE	Psmd6	26S proteasome non-ATPase regulatory subunit 6	24.5716	26.4559	0.139332	-1.60856	-4.5006	0.732065	0.538495
P59017	P59017	B2L13_MOUSE	Bcl2l13	Bcl-2-like protein 13	9.94139	6.1449	0.139424	1.72076	-1.69186	9.28482	0.538495
A2AN08	A2AN08	UBR4_MOUSE	Ubr4	E3 ubiquitin-protein ligase UBR4	16.2195	17.8707	0.139634	-1.62755	-3.96259	0.660219	0.538495
Q8VDP6	Q8VDP6	CDIPT_MOUSE	Cdipt	CDP-diacylglycerol--inositol 3-phosphatidyltransferase	41.0427	34.1503	0.13985	1.61714	-2.72947	16.5143	0.538495
P03958	P03958	ADA_MOUSE	Ada	Adenosine deaminase	48.2335	41.9894	0.139994	1.61651	-2.4764	14.9646	0.538495
Q5SNZ0	Q5SNZ0	GRDN_MOUSE	Ccdc88a	Girdin	4.19682	7.64527	0.140003	-1.70623	-8.42218	1.52528	0.538495
Q9R078	Q6PAM0;Q9R078	AAKB1_MOUSE	Prkab1	5'-AMP-activated protein kinase subunit beta-1	1.70111	3.16776	0.140982	-1.66839	-3.5633	0.629995	0.541697
Q3V079	Q3V079	BBOF1_MOUSE	Bbof1	Basal body-orientation factor 1	5.91907	18.6263	0.141407	-1.68096	-30.9934	5.57896	0.542351
Q68FL4	Q80SW1;Q68FL4	SAHH3_MOUSE	Ahcyl2	Putative adenosylhomocysteinase 3	35.099	32.3092	0.141445	1.64112	-1.16755	6.74718	0.542351
Q8BVL3	Q8BVL3	SNX17_MOUSE	Snx17	Sorting nexin-17	8.65339	7.15972	0.141861	1.63103	-0.621355	3.6087	0.542737
P97478	P97478	COQ7_MOUSE	Coq7	5-demethoxyubiquinone hydroxylase, mitochondrial	12.9206	10.7822	0.141895	1.59554	-0.850757	5.12761	0.542737
Q62186	Q62186	SSRD_MOUSE	Ssr4	Translocon-associated protein subunit delta	115.342	109.906	0.142023	1.62261	-2.24318	13.1148	0.542737
Q921M3	Q921M3	SF3B3_MOUSE	Sf3b3	Splicing factor 3B subunit 3	39.0761	36.8586	0.142131	1.70351	-1.0115	5.4467	0.542737
Q9CQ65	Q9CQ65	MTAP_MOUSE	Mtap	S-methyl-5'-thioadenosine phosphorylase	25.5338	27.72	0.142727	-1.64986	-5.31618	0.943718	0.543929
Q566J8	Q566J8	COQ8B_MOUSE	Coq8b	Atypical kinase COQ8B, mitochondrial	1.94393	3.51229	0.142745	-1.71861	-3.87188	0.735152	0.543929
P70697	P70697	DCUP_MOUSE	Urod	Uroporphyrinogen decarboxylase	6.87402	10.7853	0.142951	-1.65962	-9.53718	1.71469	0.543929
Q64516	Q64516	GLPK_MOUSE	Gk	Glycerol kinase	13.507	16.7984	0.143031	-1.64169	-7.99595	1.41319	0.543929
Q64285	Q64285	CEL_MOUSE	Cel	Bile salt-activated lipase	18.3453	2.07397	0.14336	1.70631	-7.59185	40.1345	0.544622
Q3UQ44	Q3UQ44	IQGA2_MOUSE	Iqgap2	Ras GTPase-activating-like protein IQGAP2	17.8956	24.3996	0.144107	-1.6455	-15.8611	2.85317	0.546686
Q9Z1R4	Q9Z1R4	CF047_MOUSE	D17h6s53e	Uncharacterized protein C6orf47 homolog	4.60478	7.2952	0.144278	-1.68812	-6.62721	1.24637	0.546686
Q9CZ04	Q9CZ04	CSN7A_MOUSE	Cops7a	COP9 signalosome complex subunit 7a	5.73675	8.97905	0.144346	-1.66943	-7.9548	1.47019	0.546686
P36552	P36552	HEM6_MOUSE	Cpox	Oxygen-dependent coproporphyrinogen-III oxidase, mitochondrial	10.7173	9.02884	0.145404	1.58141	-0.696217	4.07316	0.549483
Q91V12	Q91V12	BACH_MOUSE	Acot7	Cytosolic acyl coenzyme A thioester hydrolase	49.5533	56.5431	0.145574	-1.59132	-16.907	2.92746	0.549483
B1AZP2	B1AZP2	DLGP4_MOUSE	Dlgap4	Disks large-associated protein 4	4.18574	7.4857	0.145651	-1.6824	-8.15097	1.55104	0.549483
P59325	P59325	IF5_MOUSE	Eif5	Eukaryotic translation initiation factor 5	38.8552	45.6274	0.145715	-1.6212	-16.4986	2.95404	0.549483
Q6ZPJ3	Q6ZPJ3	UBE2O_MOUSE	Ube2o	(E3-independent) E2 ubiquitin-conjugating enzyme UBE2O	2.29876	4.69867	0.145935	-1.57739	-5.79218	0.992346	0.549483
Q3UVG3	Q3UVG3	F91A1_MOUSE	Fam91a1	Protein FAM91A1	4.22605	7.49382	0.145975	-1.7053	-8.12182	1.58629	0.549483
Q9CSU0	Q9CSU0	RPR1B_MOUSE	Rprd1b	Regulation of nuclear pre-mRNA domain-containing protein 1B	5.51538	8.65343	0.146142	-1.66522	-7.7316	1.45551	0.549552
P29788	P29788	VTNC_MOUSE	Vtn	Vitronectin	33.0843	19.2543	0.147421	1.67976	-6.65864	34.3186	0.553607
O88188	O88188	LY86_MOUSE	Ly86	Lymphocyte antigen 86	60.427	76.1194	0.147644	-1.57225	-37.9982	6.61347	0.553607
Q9WU78	Q9WU78	PDC6I_MOUSE	Pdcd6ip	Programmed cell death 6-interacting protein	51.8827	55.5051	0.148094	-1.56811	-8.77342	1.52855	0.553607
Q6ZQ58	Q6ZQ58	LARP1_MOUSE	Larp1	La-related protein 1	14.0444	15.6091	0.148118	-1.60231	-3.82049	0.690988	0.553607
Q60664	Q60664	IRAG2_MOUSE	Irag2	Inositol 1,4,5-triphosphate receptor associated 2	14.533	12.4846	0.148164	1.64851	-0.95994	5.05667	0.553607
Q9D187	Q9D187	CIA2B_MOUSE	Ciao2b	Cytosolic iron-sulfur assembly component 2B	6.15131	8.32909	0.148232	-1.65752	-5.38867	1.03311	0.553607
Q60953	Q60953	PML_MOUSE	Pml	Protein PML	14.1622	16.8673	0.148391	-1.61997	-6.63711	1.22705	0.553607
Q8K0G5	Q8K0G5	EIPR1_MOUSE	Eipr1	EARP and GARP complex-interacting protein 1	8.72662	15.4532	0.148584	-1.68517	-16.7714	3.31822	0.553607
Q80SY5	Q80SY5	PR38B_MOUSE	Prpf38b	Pre-mRNA-splicing factor 38B	1.76561	4.00195	0.148902	-1.57149	-5.43217	0.95949	0.553607
Q99P88	Q99P88	NU155_MOUSE	Nup155	Nuclear pore complex protein Nup155	15.3048	12.6791	0.149049	1.66704	-1.27594	6.52714	0.553607
P98083	P98083	SHC1_MOUSE	Shc1	SHC-transforming protein 1	7.73675	13.7215	0.149289	-1.67829	-14.9288	2.95935	0.553607
P56812	P56812	PDCD5_MOUSE	Pdcd5	Programmed cell death protein 5	20.0173	22.2444	0.149467	-1.58073	-5.4298	0.975565	0.553607
Q62318	Q62318	TIF1B_MOUSE	Trim28	Transcription intermediary factor 1-beta	59.3813	63.812	0.149745	-1.6042	-10.8715	2.00994	0.553607
P61211	P61211	ARL1_MOUSE	Arl1	ADP-ribosylation factor-like protein 1	1.35693	4.43279	0.149835	-1.56029	-7.46991	1.31819	0.553607
Q9QZS3	Q9QZS3	NUMB_MOUSE	Numb	Protein numb homolog	29.5808	33.4781	0.149957	-1.61655	-9.59676	1.80213	0.553607
P85094	P85094	ISC2A_MOUSE	Isoc2a	Isochorismatase domain-containing protein 2A	16.1221	20.3999	0.150111	-1.59915	-10.4939	1.93838	0.553607
Q99KH8	Q99KH8	STK24_MOUSE	Stk24	Serine/threonine-protein kinase 24	12.9239	11.6334	0.150136	1.55876	-0.554355	3.13522	0.553607
O54988	O54988	SLK_MOUSE	Slk	STE20-like serine/threonine-protein kinase	30.8357	28.4704	0.150201	1.60728	-1.08461	5.81504	0.553607
P97333	P97333	NRP1_MOUSE	Nrp1	Neuropilin-1	31.2733	17.7623	0.150252	1.68374	-6.82388	33.8459	0.553607
Q8CGP1	Q8CGP1;P10853;Q64478;Q6ZWY9	H2B1K_MOUSE	H2bc12	Histone H2B type 1-K	59.9968	83.0944	0.150266	-1.56432	-56.2116	10.0165	0.553607
P29416	P29416	HEXA_MOUSE	Hexa	Beta-hexosaminidase subunit alpha	452.509	399.779	0.150413	1.61252	-24.4226	129.884	0.553607
P70295	P70295	AUP1_MOUSE	Aup1	Lipid droplet-regulating VLDL assembly factor AUP1	12.3741	11.0578	0.150508	1.55911	-0.568834	3.20134	0.553607
Q9QZN4	Q9QZN4	FBX6_MOUSE	Fbxo6	F-box only protein 6	5.82424	9.14241	0.150684	-1.60441	-8.16325	1.52691	0.553704
P80315	P80315	TCPD_MOUSE	Cct4	T-complex protein 1 subunit delta	136.175	150.877	0.151186	-1.65942	-36.7127	7.30934	0.554999
Q8R0H9	Q8R0H9	GGA1_MOUSE	Gga1	ADP-ribosylation factor-binding protein GGA1	22.8871	25.4763	0.15142	-1.65989	-6.47078	1.29252	0.555121
Q6P5H2	Q6P5H2	NEST_MOUSE	Nes	Nestin	2.02534	3.93657	0.151519	-1.57914	-4.68375	0.861288	0.555121
Q99KK9	Q99KK9	SYHM_MOUSE	Hars2	Histidine--tRNA ligase, mitochondrial	4.21992	7.45814	0.151671	-1.67386	-8.12723	1.65081	0.55513
P50544	P50544	ACADV_MOUSE	Acadvl	Very long-chain specific acyl-CoA dehydrogenase, mitochondrial	30.1183	28.5127	0.152061	1.55858	-0.709474	3.92081	0.555437
O35465	O35465	FKBP8_MOUSE	Fkbp8	Peptidyl-prolyl cis-trans isomerase FKBP8	34.5132	30.7451	0.152094	1.55495	-1.65752	9.19362	0.555437
P61202	P61202	CSN2_MOUSE	Cops2	COP9 signalosome complex subunit 2	14.8207	17.6942	0.152205	-1.59318	-7.07965	1.33268	0.555437
O88952	O88952	LIN7C_MOUSE	Lin7c	Protein lin-7 homolog C	15.563	13.2401	0.152453	1.62133	-1.12164	5.76748	0.555792
Q8QZY1	Q8QZY1	EIF3L_MOUSE	Eif3l	Eukaryotic translation initiation factor 3 subunit L	28.7661	26.1622	0.152755	1.60854	-1.24227	6.4502	0.555961
P49813	P49813	TMOD1_MOUSE	Tmod1	Tropomodulin-1	5.46608	7.61264	0.153078	-1.59412	-5.30282	1.00968	0.555961
Q9JK23	Q9JK23	PSMG1_MOUSE	Psmg1	Proteasome assembly chaperone 1	1.60098	2.8908	0.153184	-1.6167	-3.20545	0.625814	0.555961
Q8CFX1	Q8CFX1	G6PE_MOUSE	H6pd	GDH/6PGL endoplasmic bifunctional protein	12.1707	10.8069	0.153197	1.60018	-0.64775	3.37535	0.555961
Q7TSV4	Q7TSV4	PGM2_MOUSE	Pgm2	Phosphopentomutase	48.0271	39.6464	0.153369	1.58607	-3.91692	20.6783	0.555961
P27808	P27808	MGAT1_MOUSE	Mgat1	Alpha-1,3-mannosyl-glycoprotein 2-beta-N-acetylglucosaminyltransferase	5.00945	8.91608	0.153434	-1.61423	-9.70965	1.8964	0.555961
P56213	P56213	ALR_MOUSE	Gfer	FAD-linked sulfhydryl oxidase ALR	8.2546	12.8549	0.153603	-1.61159	-11.4317	2.23105	0.555961
Q64518	Q64518	AT2A3_MOUSE	Atp2a3	Sarcoplasmic/endoplasmic reticulum calcium ATPase 3	9.68564	8.56025	0.15385	1.5556	-0.508367	2.75913	0.555961
Q8VD58	Q8VD58	EVI2B_MOUSE	Evi2b	Protein EVI2B	25.5812	22.3143	0.153892	1.59364	-1.55408	8.08774	0.555961
O55135	O55135	IF6_MOUSE	Eif6	Eukaryotic translation initiation factor 6	113.684	126.265	0.154	-1.55647	-30.8655	5.70252	0.555961
Q8K273	Q8K273	EMC5_MOUSE	Mmgt1	ER membrane protein complex subunit 5	19.5465	15.6008	0.154281	1.54523	-1.76817	9.65957	0.556432
Q8VED5	Q8VED5	K2C79_MOUSE	Krt79	Keratin, type II cytoskeletal 79	61.9939	25.0294	0.154577	1.63896	-18.8359	92.7649	0.55696
Q5SVQ0	Q5SVQ0	KAT7_MOUSE	Kat7	Histone acetyltransferase KAT7	3.64472	4.70384	0.155078	-1.54091	-2.59551	0.477261	0.558221
P31938	P31938	MP2K1_MOUSE	Map2k1	Dual specificity mitogen-activated protein kinase kinase 1	58.1293	61.3978	0.155521	-1.56477	-8.06892	1.53175	0.559255
Q3UHD6	Q3UHD6	SNX27_MOUSE	Snx27	Sorting nexin-27	28.9242	23.7349	0.155754	1.63831	-2.68801	13.0666	0.559255
Q64327	Q64327	MEA1_MOUSE	Mea1	Male-enhanced antigen 1	10.7748	14.6639	0.155975	-1.60098	-9.70378	1.92565	0.559255
Q5SUF2	Q5SUF2	LC7L3_MOUSE	Luc7l3	Luc7-like protein 3	5.56569	8.95242	0.156181	-1.60282	-8.45947	1.68602	0.559255
P61979	P61979	HNRPK_MOUSE	Hnrnpk	Heterogeneous nuclear ribonucleoprotein K	260.863	271.6	0.156317	-1.58984	-26.7389	5.26457	0.559255
P06802	P06802	ENPP1_MOUSE	Enpp1	Ectonucleotide pyrophosphatase/phosphodiesterase family member 1	0.386463	1.05438	0.156488	-1.54814	-1.64607	0.310237	0.559255
Q9D1P4	Q9D1P4	CHRD1_MOUSE	Chordc1	Cysteine and histidine-rich domain-containing protein 1	8.6132	11.7997	0.156506	-1.6001	-7.96114	1.58812	0.559255
Q9DB27	Q9DB27	MCTS1_MOUSE	Mcts1	Malignant T-cell-amplified sequence 1	27.8499	33.3282	0.156696	-1.61259	-13.7395	2.78305	0.559255
Q9D7G0	Q9D7G0	PRPS1_MOUSE	Prps1	Ribose-phosphate pyrophosphokinase 1	56.4148	70.2167	0.156751	-1.56951	-34.2301	6.62617	0.559255
Q8C5W3	Q8C5W3	TBCEL_MOUSE	Tbcel	Tubulin-specific chaperone cofactor E-like protein	6.72267	11.8416	0.157386	-1.61618	-12.8768	2.63893	0.559255
P11276	P11276	FINC_MOUSE	Fn1	Fibronectin	9.03891	4.7611	0.157392	1.54655	-2.00844	10.564	0.559255
Q91WV0	Q91WV0	NC2B_MOUSE	Dr1	Protein Dr1	18.3683	23.6478	0.157401	-1.63689	-13.3549	2.79599	0.559255
Q9ER72	Q9ER72	SYCC_MOUSE	Cars1	Cysteine--tRNA ligase, cytoplasmic	47.3571	53.4334	0.157534	-1.52788	-14.9374	2.7849	0.559255
Q8K1J6	Q8K1J6	TRNT1_MOUSE	Trnt1	CCA tRNA nucleotidyltransferase 1, mitochondrial	7.12294	11.1152	0.157549	-1.59481	-9.99037	2.00578	0.559255
Q9CPW5	Q9CPW5	SSRB_MOUSE	Ssr2	Translocon-associated protein subunit beta	32.5261	41.8898	0.15763	-1.52785	-23.0248	4.29735	0.559255
Q9ES52	Q9ES52	SHIP1_MOUSE	Inpp5d	Phosphatidylinositol 3,4,5-trisphosphate 5-phosphatase 1	68.1718	58.6398	0.157995	1.52661	-4.38959	23.4535	0.560013
Q9Z2I0	Q9Z2I0	LETM1_MOUSE	Letm1	Mitochondrial proton/calcium exchanger protein	26.7467	22.1908	0.158411	1.63492	-2.4421	11.5538	0.560878
P97350	P97350	PKP1_MOUSE	Pkp1	Plakophilin-1	17.7314	0	0.158542	1.6564	-9.78608	45.2489	0.560878
Q9CR26	Q9CR26	VTA1_MOUSE	Vta1	Vacuolar protein sorting-associated protein VTA1 homolog	48.3933	51.4411	0.158969	-1.56952	-7.60602	1.51042	0.561649
Q8BNU0	Q8BNU0	ARMC6_MOUSE	Armc6	Armadillo repeat-containing protein 6	4.76272	8.4135	0.159063	-1.62279	-9.24627	1.94472	0.561649
P62984	P62984	RL40_MOUSE	Uba52	Ubiquitin-60S ribosomal protein L40	1.59301	3.09558	0.15944	-1.57818	-3.76367	0.75852	0.561803
Q923D5	Q923D5	WBP11_MOUSE	Wbp11	WW domain-binding protein 11	14.0675	12.744	0.159539	1.5198	-0.616927	3.26383	0.561803
Q9CQU3	Q9CQU3	RER1_MOUSE	Rer1	Protein RER1	10.3009	6.69168	0.159572	1.59753	-1.87338	9.09172	0.561803
P28662	P28662	BRI3_MOUSE	Bri3	Brain protein I3	4.38905	7.8616	0.159713	-1.60603	-8.77167	1.82657	0.561803
Q8CIN4	Q8CIN4	PAK2_MOUSE	Pak2	Serine/threonine-protein kinase PAK 2	57.0082	60.6522	0.160108	-1.51851	-8.99715	1.70915	0.562656
P08556	Q61411;P08556	RASN_MOUSE	Nras	GTPase NRas	84.8907	89.7666	0.160503	-1.55531	-12.1736	2.42184	0.563511
P16254	P16254	SRP14_MOUSE	Srp14	Signal recognition particle 14 kDa protein	21.7049	19.4031	0.160815	1.53489	-1.11604	5.71964	0.563779
O08688	O08688	CAN5_MOUSE	Capn5	Calpain-5	8.56955	14.9629	0.160939	-1.61649	-16.2562	3.46955	0.563779
Q61578	Q61578	ADRO_MOUSE	Fdxr	NADPH:adrenodoxin oxidoreductase, mitochondrial	8.03352	12.2285	0.161116	-1.63775	-10.7362	2.34617	0.563779
Q9DBE0	Q9DBE0	CSAD_MOUSE	Csad	Cysteine sulfinic acid decarboxylase	2.78489	4.28121	0.161188	-1.62055	-3.8119	0.819255	0.563779
Q99LB6	Q99LB6	MAT2B_MOUSE	Mat2b	Methionine adenosyltransferase 2 subunit beta	48.6194	55.2041	0.161966	-1.51872	-16.34	3.17069	0.565965
Q922B9	Q922B9	ITPI2_MOUSE	Itprid2	Protein ITPRID2	14.7197	12.3311	0.162212	1.55341	-1.21209	5.98939	0.566291
Q62189	Q62189	SNRPA_MOUSE	Snrpa	U1 small nuclear ribonucleoprotein A	32.1012	35.0887	0.162496	-1.59788	-7.59228	1.61715	0.566747
Q9R1Z7	Q9R1Z7	PTPS_MOUSE	Pts	6-pyruvoyl tetrahydrobiopterin synthase	12.1208	16.3925	0.16272	-1.57754	-10.8003	2.25681	0.566996
P31230	P31230	AIMP1_MOUSE	Aimp1	Aminoacyl tRNA synthase complex-interacting multifunctional protein 1	54.6016	64.8867	0.16297	-1.55238	-25.8372	5.26706	0.567333
Q8VI36	Q8VI36	PAXI_MOUSE	Pxn	Paxillin	13.0013	14.5029	0.163152	-1.50784	-3.72677	0.723624	0.567433
Q9CQH7	Q9CQH7	BT3L4_MOUSE	Btf3l4	Transcription factor BTF3 homolog 4	25.8371	29.511	0.163445	-1.50419	-9.11615	1.76829	0.567742
Q9Z0J0	Q9Z0J0	NPC2_MOUSE	Npc2	NPC intracellular cholesterol transporter 2	42.722	48.5869	0.163607	-1.5119	-14.5908	2.86098	0.567742
Q8K1B8	Q8K1B8	URP2_MOUSE	Fermt3	Fermitin family homolog 3	160.144	144.679	0.163819	1.53801	-7.85391	38.7839	0.567742
Q9D3S3	Q9D3S3	SNX29_MOUSE	Snx29	Sorting nexin-29	4.66355	8.10495	0.163886	-1.61396	-8.8234	1.9406	0.567742
Q922P9	Q922P9	GLYR1_MOUSE	Glyr1	Putative oxidoreductase GLYR1	10.7512	8.57786	0.164008	1.54997	-1.12538	5.472	0.567742
Q9WTI7	Q9WTI7	MYO1C_MOUSE	Myo1c	Unconventional myosin-Ic	100.771	93.6225	0.164399	1.50284	-3.47912	17.7755	0.568564
Q8R307	Q8R307	VPS18_MOUSE	Vps18	Vacuolar protein sorting-associated protein 18 homolog	17.9623	16.6624	0.164789	1.5843	-0.713436	3.31324	0.569075
E9PYK3	E9PYK3	PARP4_MOUSE	Parp4	Protein mono-ADP-ribosyltransferase PARP4	6.2228	9.62076	0.165055	-1.60206	-8.71313	1.91721	0.569075
Q8K1X4	Q8K1X4	NCKPL_MOUSE	Nckap1l	Nck-associated protein 1-like	45.1143	41.5682	0.165225	1.58221	-1.95248	9.04451	0.569075
Q9QWR8	Q9QWR8	NAGAB_MOUSE	Naga	Alpha-N-acetylgalactosaminidase	79.9608	75.2889	0.165406	1.56798	-2.52905	11.8727	0.569075
P97429	P97429	ANXA4_MOUSE	Anxa4	Annexin A4	336.101	406.967	0.165472	-1.50008	-176.595	34.8629	0.569075
Q60520	Q60520	SIN3A_MOUSE	Sin3a	Paired amphipathic helix protein Sin3a	13.727	11.7386	0.165572	1.49906	-0.978075	4.95488	0.569075
Q63932	Q63932	MP2K2_MOUSE	Map2k2	Dual specificity mitogen-activated protein kinase kinase 2	8.71192	11.769	0.165681	-1.5419	-7.71613	1.60188	0.569075
O70496	O70496	CLCN7_MOUSE	Clcn7	H(+)/Cl(-) exchange transporter 7	36.1292	38.6533	0.165775	-1.49598	-6.28765	1.23942	0.569075
P70441	P70441	NHRF1_MOUSE	Slc9a3r1	Na(+)/H(+) exchange regulatory cofactor NHE-RF1	29.2491	24.5567	0.165994	1.50831	-2.35316	11.7381	0.569298
Q60870	Q60870	REEP5_MOUSE	Reep5	Receptor expression-enhancing protein 5	9.59689	5.08866	0.166472	1.52072	-2.31692	11.3334	0.570409
O35682	O35682	MYADM_MOUSE	Myadm	Myeloid-associated differentiation marker	54.8631	43.4197	0.166812	1.50737	-5.79514	28.6819	0.570982
P62307	P62307	RUXF_MOUSE	Snrpf	Small nuclear ribonucleoprotein F	32.1783	25.65	0.167075	1.49953	-3.28006	16.3368	0.570982
P54729	P54729	NUB1_MOUSE	Nub1	NEDD8 ultimate buster 1	8.35987	12.7431	0.167102	-1.60514	-11.3216	2.55507	0.570982
Q9CX56	Q9CX56	PSMD8_MOUSE	Psmd8	26S proteasome non-ATPase regulatory subunit 8	15.0343	18.1898	0.167643	-1.548	-8.02428	1.71328	0.571403
O35114	O35114	SCRB2_MOUSE	Scarb2	Lysosome membrane protein 2	48.1366	43.1604	0.167732	1.50074	-2.52714	12.4796	0.571403
Q9R1P3	Q9R1P3	PSB2_MOUSE	Psmb2	Proteasome subunit beta type-2	155.534	164.128	0.168009	-1.50776	-21.6159	4.42653	0.571403
Q8VE96	Q8VE96	S35F6_MOUSE	Slc35f6	Solute carrier family 35 member F6	28.7404	26.1156	0.168181	1.50081	-1.34126	6.59086	0.571403
Q9JI10	Q9JI10	STK3_MOUSE	Stk3	Serine/threonine-protein kinase 3	18.3402	22.2491	0.168206	-1.48708	-9.77569	1.95789	0.571403
Q9D8S3	Q9D8S3	ARFG3_MOUSE	Arfgap3	ADP-ribosylation factor GTPase-activating protein 3	10.8443	14.7411	0.168261	-1.57639	-10.0134	2.21985	0.571403
Q8BHG9	Q8BHG9	CGBP1_MOUSE	Cggbp1	CGG triplet repeat-binding protein 1	10.0204	16.9555	0.168305	-1.59864	-17.9449	4.07468	0.571403
P62488	P62488	RPB7_MOUSE	Polr2g	DNA-directed RNA polymerase II subunit RPB7	5.28012	8.30252	0.168776	-1.6029	-7.84246	1.79765	0.572477
Q8BK64	Q8BK64	AHSA1_MOUSE	Ahsa1	Activator of 90 kDa heat shock protein ATPase homolog 1	43.9359	50.2895	0.169295	-1.48529	-15.9282	3.22087	0.573069
Q3U487	Q3U487	HECD3_MOUSE	Hectd3	E3 ubiquitin-protein ligase HECTD3	8.87775	7.41955	0.169395	1.50041	-0.757022	3.67342	0.573069
Q61235	Q61235	SNTB2_MOUSE	Sntb2	Beta-2-syntrophin	15.1212	12.4483	0.169505	1.53393	-1.4591	6.80487	0.573069
Q8BHD7	P17225;Q8BHD7;Q91Z31	PTBP3_MOUSE	Ptbp3	Polypyrimidine tract-binding protein 3	55.7889	60.3818	0.169612	-1.52472	-11.6636	2.47785	0.573069
Q9CYN9	Q9CYN9	RENR_MOUSE	Atp6ap2	Renin receptor	12.6428	9.18515	0.169724	1.54732	-1.9296	8.84496	0.573069
P24452	P24452	CAPG_MOUSE	Capg	Macrophage-capping protein	747.585	841.973	0.17009	-1.48324	-236.99	48.2139	0.573363
Q61144	Q61144	PSN2_MOUSE	Psen2	Presenilin-2	15.5478	12.1396	0.17012	1.50161	-1.78991	8.60633	0.573363
Q8CH18	Q8CH18	CCAR1_MOUSE	Ccar1	Cell division cycle and apoptosis regulator protein 1	26.0535	24.0382	0.170512	1.47805	-1.02723	5.05786	0.573689
Q9DBC3	Q9DBC3	CMTR1_MOUSE	Cmtr1	Cap-specific mRNA (nucleoside-2'-O-)-methyltransferase 1	8.35701	11.3561	0.170661	-1.56878	-7.7452	1.74701	0.573689
Q9D338	Q9D338	RM19_MOUSE	Mrpl19	39S ribosomal protein L19, mitochondrial	2.02425	3.54614	0.170682	-1.5504	-3.90797	0.864187	0.573689
Q6X893	Q6X893	CTL1_MOUSE	Slc44a1	Choline transporter-like protein 1	3.08694	5.82734	0.171228	-1.47653	-6.88779	1.407	0.574285
Q8BGD8	Q8BGD8	COA6_MOUSE	Coa6	Cytochrome c oxidase assembly factor 6 homolog	5.41193	9.40452	0.171256	-1.56821	-10.3279	2.34272	0.574285
P62334	P62334	PRS10_MOUSE	Psmc6	26S proteasome regulatory subunit 10B	63.9717	70.0225	0.171324	-1.50304	-15.3379	3.23638	0.574285
Q9ES28	Q9ES28	ARHG7_MOUSE	Arhgef7	Rho guanine nucleotide exchange factor 7	41.4938	37.1579	0.172285	1.52881	-2.43946	11.1112	0.576082
Q91VN6	Q91VN6	DDX41_MOUSE	Ddx41	Probable ATP-dependent RNA helicase DDX41	4.84984	9.32262	0.172301	-1.47009	-11.2524	2.30685	0.576082
Q8CI04	Q8CI04	COG3_MOUSE	Cog3	Conserved oligomeric Golgi complex subunit 3	29.6847	41.3398	0.172327	-1.58044	-30.3681	7.05777	0.576082
A2AWA9	A2AWA9	RBGP1_MOUSE	Rabgap1	Rab GTPase-activating protein 1	9.74752	8.18424	0.172659	1.55465	-0.91724	4.0438	0.576673
P16045	P16045	LEG1_MOUSE	Lgals1	Galectin-1	468.494	513.841	0.173981	-1.46467	-114.412	23.7165	0.580213
O09111	O09111	NDUBB_MOUSE	Ndufb11	NADH dehydrogenase [ubiquinone] 1 beta subcomplex subunit 11, mitochondrial	37.0314	31.4822	0.174191	1.4877	-3.01392	14.1122	0.580213
Q9CR09	Q9CR09	UFC1_MOUSE	Ufc1	Ubiquitin-fold modifier-conjugating enzyme 1	56.606	63.4949	0.174329	-1.4708	-17.4314	3.65356	0.580213
Q9WVR4	Q9WVR4	FXR2_MOUSE	Fxr2	Fragile X mental retardation syndrome-related protein 2	7.13938	10.7742	0.174346	-1.5723	-9.5061	2.23649	0.580213
Q6NVE8	Q6NVE8	WDR44_MOUSE	Wdr44	WD repeat-containing protein 44	5.28555	8.03596	0.174538	-1.53539	-7.11091	1.61008	0.580329
P61458	P61458	PHS_MOUSE	Pcbd1	Pterin-4-alpha-carbinolamine dehydratase	0	2.36361	0.17497	-1.57988	-6.20937	1.48215	0.580329
E9PXF8	E9PXF8	MTMRD_MOUSE	Sbf2	Myotubularin-related protein 13	0	3.18216	0.175067	-1.57945	-8.36117	1.99685	0.580329
Q8K3W0	Q8K3W0	BABA2_MOUSE	Babam2	BRISC and BRCA1-A complex member 2	3.59761	6.22016	0.175148	-1.57165	-6.87472	1.62963	0.580329
O55201	O55201	SPT5H_MOUSE	Supt5h	Transcription elongation factor SPT5	16.4248	14.4181	0.175164	1.49086	-1.10928	5.12265	0.580329
O35864	O35864	CSN5_MOUSE	Cops5	COP9 signalosome complex subunit 5	20.9758	24.4079	0.176196	-1.49027	-8.78569	1.92152	0.582521
O70133	O70133	DHX9_MOUSE	Dhx9	ATP-dependent RNA helicase A	41.2625	38.8719	0.17629	1.4601	-1.27969	6.06076	0.582521
Q9CY66	Q9CY66	GAR1_MOUSE	Gar1	H/ACA ribonucleoprotein complex subunit 1	10.2196	8.50873	0.176541	1.45871	-0.916875	4.3386	0.582521
Q9CX00	Q9CX00	IST1_MOUSE	Ist1	IST1 homolog	28.1336	30.0369	0.176571	-1.46359	-4.83458	1.02811	0.582521
Q9JM14	Q9JM14	NT5C_MOUSE	Nt5c	5'(3')-deoxyribonucleotidase, cytosolic type	54.7066	50.2829	0.176717	1.47755	-2.4461	11.2936	0.582521
Q8BTM8	Q8BTM8	FLNA_MOUSE	Flna	Filamin-A	316.753	334.529	0.176769	-1.49695	-45.6801	10.1287	0.582521
Q60714	Q60714	S27A1_MOUSE	Slc27a1	Long-chain fatty acid transport protein 1	16.0111	13.6191	0.177011	1.49896	-1.37142	6.15525	0.582791
O35954	O35954	PITM1_MOUSE	Pitpnm1	Membrane-associated phosphatidylinositol transfer protein 1	6.47983	8.89021	0.177166	-1.507	-6.22228	1.40152	0.582791
P01898	P01898	HA10_MOUSE	H2-Q10	H-2 class I histocompatibility antigen, Q10 alpha chain	11.1865	17.0223	0.177562	-1.53895	-15.2462	3.57467	0.582898
Q9CQR6	Q9CQR6	PPP6_MOUSE	Ppp6c	Serine/threonine-protein phosphatase 6 catalytic subunit	13.6578	15.845	0.177755	-1.45225	-5.55335	1.17894	0.582898
Q8CIE4	Q8CIE4	PAR10_MOUSE	Parp10	Protein mono-ADP-ribosyltransferase PARP10	9.19164	11.2249	0.177854	-1.45192	-5.16331	1.09679	0.582898
P51175	P51175	PPOX_MOUSE	Ppox	Protoporphyrinogen oxidase	7.63644	10.1448	0.178077	-1.56328	-6.61867	1.60191	0.582898
Q8QZZ7	Q8QZZ7	TPRKB_MOUSE	Tprkb	EKC/KEOPS complex subunit Tprkb	6.66655	11.5601	0.178142	-1.50404	-12.6564	2.8694	0.582898
Q8CEC6	Q8CEC6	PPWD1_MOUSE	Ppwd1	Peptidylprolyl isomerase domain and WD repeat-containing protein 1	2.40296	4.49209	0.178241	-1.44961	-5.30676	1.12852	0.582898
Q9WTR1	Q9WTR1	TRPV2_MOUSE	Trpv2	Transient receptor potential cation channel subfamily V member 2	46.3858	40.5287	0.178364	1.51405	-3.49623	15.2106	0.582898
Q8BFY6	Q8BFY6	PEF1_MOUSE	Pef1	Peflin	9.57005	14.3174	0.178458	-1.56223	-12.5373	3.04256	0.582898
P70677	P70677	CASP3_MOUSE	Casp3	Caspase-3	24.8885	28.1503	0.178675	-1.44995	-8.2963	1.77284	0.583096
Q9CZW4	Q9CZW4	ACSL3_MOUSE	Acsl3	Fatty acid CoA ligase Acsl3	6.3396	9.88985	0.178855	-1.50571	-9.20707	2.10658	0.583168
Q8BNI4	Q8BNI4	DERL2_MOUSE	Derl2	Derlin-2	7.90563	11.9286	0.179173	-1.53892	-10.5632	2.5172	0.583506
P61620	P61620;Q9JLR1	S61A1_MOUSE	Sec61a1	Protein transport protein Sec61 subunit alpha isoform 1	39.91	34.1904	0.179274	1.44526	-3.10994	14.5492	0.583506
Q9QXX4	Q9QXX4	CMC2_MOUSE	Slc25a13	Calcium-binding mitochondrial carrier protein Aralar2	37.6097	33.0685	0.17983	1.50237	-2.71558	11.7981	0.584345
Q61495;Q7TSF1	Q7TSF1;Q61495	DSG1A_MOUSE;DSG1B_MOUSE	Dsg1a;Dsg1b	Desmoglein-1-alpha	8.75682	0	0.179847	1.55853	-5.68636	23.2	0.584345
Q8BWC0	Q8BWC0	TPC2_MOUSE	Tpcn2	Two pore channel protein 2	12.6702	5.68148	0.180312	1.46047	-3.94425	17.9217	0.584578
P17433	P17433	SPI1_MOUSE	Spi1	Transcription factor PU.1	10.3487	6.54558	0.180347	1.51473	-2.33231	9.93864	0.584578
Q61316	Q61316	HSP74_MOUSE	Hspa4	Heat shock 70 kDa protein 4	71.2128	76.4753	0.18057	-1.49171	-13.6516	3.12664	0.584578
Q9D819	Q9D819	IPYR_MOUSE	Ppa1	Inorganic pyrophosphatase	33.9793	38.9854	0.180624	-1.50618	-13.054	3.04197	0.584578
Q3THE2	Q3THE2	ML12B_MOUSE	Myl12b	Myosin regulatory light chain 12B	369.306	310.123	0.18085	1.47182	-34.2323	152.597	0.584578
Q9DC69	Q9DC69	NDUA9_MOUSE	Ndufa9	NADH dehydrogenase [ubiquinone] 1 alpha subcomplex subunit 9, mitochondrial	25.6859	22.5847	0.18103	1.51867	-1.93007	8.13237	0.584578
Q3TTY5	Q3TTY5	K22E_MOUSE	Krt2	Keratin, type II cytoskeletal 2 epidermal	73.0317	21.6053	0.181238	1.54654	-33.431	136.284	0.584578
Q9QZB9	Q9QZB9	DCTN5_MOUSE	Dctn5	Dynactin subunit 5	10.8075	16.3086	0.181332	-1.54541	-14.5768	3.57467	0.584578
P51863	P51863	VA0D1_MOUSE	Atp6v0d1	V-type proton ATPase subunit d 1	160.022	152.096	0.181339	1.5255	-5.00299	20.8543	0.584578
Q923D4	Q923D4	SF3B5_MOUSE	Sf3b5	Splicing factor 3B subunit 5	37.0629	43.7988	0.181708	-1.52478	-17.7397	4.26793	0.585258
Q8VBZ0	Q8VBZ0	DHRSX_MOUSE	Dhrsx	Dehydrogenase/reductase SDR family member on chromosome X homolog	13.0904	10.9627	0.181896	1.49747	-1.29739	5.55285	0.585353
P27612	P27612	PLAP_MOUSE	Plaa	Phospholipase A-2-activating protein	40.602	38.4331	0.1831	1.48061	-1.30907	5.64667	0.588191
Q9CPQ1	Q9CPQ1	COX6C_MOUSE	Cox6c	Cytochrome c oxidase subunit 6C	117.047	131.297	0.183337	-1.43797	-36.5692	8.06908	0.588191
P62137	P62137	PP1A_MOUSE	Ppp1ca	Serine/threonine-protein phosphatase PP1-alpha catalytic subunit	68.0931	75.0866	0.183481	-1.42904	-17.8979	3.91085	0.588191
Q9D1Q4	Q9D1Q4	DPM3_MOUSE	Dpm3	Dolichol-phosphate mannosyltransferase subunit 3	14.9707	11.8383	0.1835	1.5099	-1.98704	8.2519	0.588191
P04104	P04104	K2C1_MOUSE	Krt1	Keratin, type II cytoskeletal 1	417.848	70.5029	0.183704	1.53822	-230.392	925.083	0.588191
Q8BLY7	Q8BLY7	HPS6_MOUSE	Hps6	Hermansky-Pudlak syndrome 6 protein homolog	2.11578	3.63185	0.184005	-1.50102	-3.9873	0.955143	0.588191
Q8BKX1	Q8BKX1	BAIP2_MOUSE	Baiap2	Brain-specific angiogenesis inhibitor 1-associated protein 2	15.2776	13.5597	0.184015	1.45395	-1.00646	4.44232	0.588191
Q9EPU4	Q9EPU4	CPSF1_MOUSE	Cpsf1	Cleavage and polyadenylation specificity factor subunit 1	8.8404	11.9371	0.184048	-1.44926	-7.99492	1.80155	0.588191
Q9R0H0	Q9R0H0	ACOX1_MOUSE	Acox1	Peroxisomal acyl-coenzyme A oxidase 1	8.77052	6.0564	0.185109	1.42652	-1.54315	6.97138	0.589395
Q922U2	Q922U2	K2C5_MOUSE	Krt5	Keratin, type II cytoskeletal 5	408.962	104.106	0.185267	1.52602	-202.676	812.388	0.589395
Q8VEK0	Q8VEK0;Q8BHG3	CC50A_MOUSE	Tmem30a	Cell cycle control protein 50A	35.295	33.7213	0.185365	1.4402	-0.917623	4.06492	0.589395
Q9DCX2	Q9DCX2	ATP5H_MOUSE	Atp5pd	ATP synthase subunit d, mitochondrial	146.946	160.591	0.185639	-1.43055	-35.1514	7.86138	0.589395
P58281	P58281	OPA1_MOUSE	Opa1	Dynamin-like 120 kDa protein, mitochondrial	22.1965	14.162	0.185666	1.52809	-5.3857	21.4549	0.589395
Q922Q8	Q922Q8	LRC59_MOUSE	Lrrc59	Leucine-rich repeat-containing protein 59	204.047	226.14	0.18567	-1.45514	-57.4294	13.2441	0.589395
Q91YX0	Q91YX0	THMS2_MOUSE	Themis2	Protein THEMIS2	16.8563	22.6425	0.185678	-1.45777	-15.0558	3.48347	0.589395
P56380	P56380	AP4A_MOUSE	Nudt2	Bis(5'-nucleosyl)-tetraphosphatase [asymmetrical]	15.0399	18.7682	0.185934	-1.49804	-9.85357	2.39703	0.589395
P56376	P56376	ACYP1_MOUSE	Acyp1	Acylphosphatase-1	0	1.94852	0.186022	-1.53229	-5.21736	1.32033	0.589395
Q80TP3	Q80TP3	UBR5_MOUSE	Ubr5	E3 ubiquitin-protein ligase UBR5	14.0371	0	0.186175	1.53165	-9.52152	37.5957	0.589395
Q7TNC4	Q7TNC4	LC7L2_MOUSE	Luc7l2	Putative RNA-binding protein Luc7-like 2	25.8743	23.648	0.186492	1.43605	-1.30816	5.76093	0.589395
P42227	P42227	STAT3_MOUSE	Stat3	Signal transducer and activator of transcription 3	7.83147	10.3318	0.186976	-1.50158	-6.63879	1.63804	0.589395
Q9QYA2	Q9QYA2	TOM40_MOUSE	Tomm40	Mitochondrial import receptor subunit TOM40 homolog	33.1093	27.8251	0.187015	1.48264	-3.36422	13.9326	0.589395
Q3V4B5	Q3V4B5	COMD6_MOUSE	Commd6	COMM domain-containing protein 6	13.73	15.8274	0.187239	-1.42163	-5.41025	1.21533	0.589395
P14685	P14685	PSMD3_MOUSE	Psmd3	26S proteasome non-ATPase regulatory subunit 3	38.7032	35.0139	0.187242	1.43289	-2.17724	9.55584	0.589395
P10605	P10605	CATB_MOUSE	Ctsb	Cathepsin B	917.96	815.154	0.187298	1.45004	-62.4095	268.023	0.589395
Q99J87	Q99J87	DHX58_MOUSE	Dhx58	ATP-dependent RNA helicase DHX58	8.2466	11.435	0.187433	-1.49521	-8.45742	2.08065	0.589395
Q7TQ95	Q7TQ95	LNP_MOUSE	Lnpk	Endoplasmic reticulum junction formation protein lunapark	12.6162	13.4281	0.187484	-1.46218	-2.12726	0.50359	0.589395
Q8C878	Q8C878	UBA3_MOUSE	Uba3	NEDD8-activating enzyme E1 catalytic subunit	17.8662	16.0099	0.187534	1.4994	-1.22073	4.93329	0.589395
P56383;P56384;Q9CR84	P56384;P56383;Q9CR84	AT5G1_MOUSE;AT5G2_MOUSE;AT5G3_MOUSE	Atp5mc1;Atp5mc2;Atp5mc3	ATP synthase F(0) complex subunit C2, mitochondrial	10.7009	14.5998	0.187607	-1.4644	-10.2285	2.43081	0.589395
Q3V1T4	Q3V1T4	P3H1_MOUSE	P3h1	Prolyl 3-hydroxylase 1	2.80205	4.32306	0.188182	-1.49437	-4.04285	1.00083	0.590257
Q9DCS9	Q9DCS9	NDUBA_MOUSE	Ndufb10	NADH dehydrogenase [ubiquinone] 1 beta subcomplex subunit 10	25.6906	22.3137	0.1882	1.48575	-2.19322	8.94705	0.590257
Q7TMW6	Q7TMW6	CIAO3_MOUSE	Ciao3	Cytosolic iron-sulfur assembly component 3	19.527	8.61778	0.188583	1.49396	-7.21047	29.0288	0.590957
P60898	P60898	RPB9_MOUSE	Polr2i	DNA-directed RNA polymerase II subunit RPB9	21.4172	18.7863	0.188885	1.4184	-1.54802	6.80979	0.591404
Q91VT4	Q91VT4	CBR4_MOUSE	Cbr4	3-oxoacyl-[acyl-carrier-protein] reductase	17.6336	20.7307	0.189189	-1.41013	-7.99872	1.80449	0.591732
Q9QZB7	Q9QZB7	ARP10_MOUSE	Actr10	Actin-related protein 10	15.4532	11.6291	0.189522	1.50137	-2.58719	10.2353	0.591732
Q60759	Q60759	GCDH_MOUSE	Gcdh	Glutaryl-CoA dehydrogenase, mitochondrial	9.96631	13.3209	0.1896	-1.4468	-8.79482	2.08565	0.591732
Q9CS42	Q9CS42	PRPS2_MOUSE	Prps2	Ribose-phosphate pyrophosphokinase 2	4.59359	6.93854	0.189629	-1.48969	-6.25029	1.56039	0.591732
Q3TZZ7	Q3TZZ7	ESYT2_MOUSE	Esyt2	Extended synaptotagmin-2	19.0077	15.3413	0.190468	1.4891	-2.46355	9.79628	0.593849
P11983	P11983	TCPA_MOUSE	Tcp1	T-complex protein 1 subunit alpha	103.89	110.117	0.19094	-1.45557	-16.4478	3.99315	0.594568
Q8BMJ3	Q8BMJ3	IF1AX_MOUSE	Eif1ax	Eukaryotic translation initiation factor 1A, X-chromosomal	1.29008	2.46123	0.191192	-1.4023	-3.03282	0.690516	0.594568
Q91VW5	Q91VW5	GOGA4_MOUSE	Golga4	Golgin subfamily A member 4	2.92362	5.66603	0.191266	-1.40249	-7.10377	1.61894	0.594568
Q920E5	Q920E5	FPPS_MOUSE	Fdps	Farnesyl pyrophosphate synthase	19.9209	24.8472	0.191341	-1.43849	-12.9413	3.08875	0.594568
Q9Z0P5	Q9Z0P5	TWF2_MOUSE	Twf2	Twinfilin-2	51.3313	44.5576	0.191717	1.47106	-4.49536	18.0428	0.594825
P28574	P28574	MAX_MOUSE	Max	Protein max	7.4526	9.91208	0.191835	-1.47928	-6.57491	1.65594	0.594825
Q4QRL3	Q4QRL3	CC88B_MOUSE	Ccdc88b	Coiled-coil domain-containing protein 88B	6.55023	9.79702	0.191905	-1.50205	-8.76012	2.26655	0.594825
Q6GQT9	Q6GQT9	NOMO1_MOUSE	Nomo1	Nodal modulator 1	25.4414	24.5113	0.192518	1.40504	-0.560077	2.42038	0.59617
P63085	P63085	MK01_MOUSE	Mapk1	Mitogen-activated protein kinase 1	62.6593	67.2784	0.192987	-1.41433	-12.0794	2.84117	0.59617
Q8BL97	Q8BL97	SRSF7_MOUSE	Srsf7	Serine/arginine-rich splicing factor 7	52.7168	43.5107	0.193065	1.403	-5.56179	23.974	0.59617
P53996	P53996	CNBP_MOUSE	Cnbp	CCHC-type zinc finger nucleic acid binding protein	23.8232	30.314	0.193523	-1.40938	-16.9676	3.986	0.59617
Q99104	Q99104	MYO5A_MOUSE	Myo5a	Unconventional myosin-Va	23.0776	20.4605	0.193595	1.4247	-1.65002	6.88432	0.59617
Q9D832	Q9D832;Q9QYJ3	DNJB4_MOUSE	Dnajb4	DnaJ homolog subfamily B member 4	7.90585	11.9433	0.193637	-1.45897	-10.7676	2.69264	0.59617
P18468	P18468	HB2I_MOUSE	H2-Eb1	H-2 class II histocompatibility antigen, I-A beta chain	0	0.967483	0.193664	-1.50096	-2.62442	0.689449	0.59617
Q8BI72	Q8BI72	CARF_MOUSE	Cdkn2aip	CDKN2A-interacting protein	8.77045	6.98912	0.193748	1.4718	-1.21417	4.77682	0.59617
Q9D8Y1	Q9D8Y1	T126A_MOUSE	Tmem126a	Transmembrane protein 126A	4.60623	2.52143	0.193951	1.39529	-1.25693	5.42655	0.59617
P50580	P50580	PA2G4_MOUSE	Pa2g4	Proliferation-associated protein 2G4	125.527	134.147	0.193995	-1.48861	-23.2897	6.05103	0.59617
P54071	P54071	IDHP_MOUSE	Idh2	Isocitrate dehydrogenase [NADP], mitochondrial	93.8628	101.583	0.19411	-1.41188	-20.2358	4.79544	0.59617
Q9DAS9	Q9DAS9	GBG12_MOUSE	Gng12	Guanine nucleotide-binding protein G(I)/G(S)/G(O) subunit gamma-12	53.164	46.1335	0.194612	1.41371	-4.40761	18.4685	0.597217
P14869	P14869	RLA0_MOUSE	Rplp0	60S acidic ribosomal protein P0	120.746	133.386	0.19541	-1.41913	-33.3551	8.07534	0.598754
Q8BNV1	Q8BNV1	TRM2A_MOUSE	Trmt2a	tRNA (uracil-5-)-methyltransferase homolog A	9.49895	15.8871	0.19558	-1.47942	-17.2857	4.50938	0.598754
Q6PB44	Q6PB44	PTN23_MOUSE	Ptpn23	Tyrosine-protein phosphatase non-receptor type 23	24.7258	27.9192	0.195597	-1.39715	-8.35772	1.97086	0.598754
P42669	P42669	PURA_MOUSE	Pura	Transcriptional activator protein Pur-alpha	22.4401	26.9985	0.19616	-1.41222	-12.0226	2.90565	0.59998
Q9DCZ4	Q9DCZ4	MIC26_MOUSE	Apoo	MICOS complex subunit Mic26	9.33497	7.82119	0.196568	1.40168	-0.952724	3.9803	0.600734
Q8C172	Q8C172	CERS6_MOUSE	Cers6	Ceramide synthase 6	11.3223	16.8022	0.196972	-1.48075	-14.9042	3.94443	0.601092
Q8VCW4	Q8VCW4	UN93B_MOUSE	Unc93b1	Protein unc-93 homolog B1	41.7436	34.3041	0.19701	1.43778	-4.99942	19.8784	0.601092
Q8BMS9	Q8BMS9	RASF2_MOUSE	Rassf2	Ras association domain-containing protein 2	30.4581	27.3996	0.197487	1.38566	-1.89428	8.01138	0.601703
P97784;Q9R194	Q9R194;P97784	CRY1_MOUSE;CRY2_MOUSE	Cry1;Cry2	Cryptochrome-1	6.62643	12.0382	0.197535	-1.38385	-14.1667	3.34321	0.601703
Q01730	Q01730	RSU1_MOUSE	Rsu1	Ras suppressor protein 1	43.5215	36.9675	0.198013	1.4217	-4.34212	17.4501	0.602302
Q61542	Q61542	STAR3_MOUSE	Stard3	StAR-related lipid transfer protein 3	2.59062	7.62887	0.198057	-1.37866	-13.1809	3.10442	0.602302
P02535	Q61781;P02535;Q9Z2K1;Q8VCW2;Q9Z320;Q61414	K1C10_MOUSE	Krt10	Keratin, type I cytoskeletal 10	752.954	119.691	0.198622	1.47959	-464.453	1730.98	0.60233
Q91Z96	Q91Z96	BMP2K_MOUSE	Bmp2k	BMP-2-inducible protein kinase	23.8657	21.5671	0.19865	1.41217	-1.51054	6.10774	0.60233
O08528	O08528;Q91W97	HXK2_MOUSE	Hk2	Hexokinase-2	29.8345	34.6278	0.198701	-1.38409	-12.5914	3.00476	0.60233
Q9CR00	Q9CR00	PSMD9_MOUSE	Psmd9	26S proteasome non-ATPase regulatory subunit 9	56.7537	53.012	0.198717	1.40567	-2.43404	9.91751	0.60233
Q9JIX0	Q9JIX0	ENY2_MOUSE	Eny2	Transcription and mRNA export factor ENY2	29.3685	11.581	0.199039	1.47896	-13.1008	48.6757	0.602814
Q8JZK9	Q8JZK9	HMCS1_MOUSE	Hmgcs1	Hydroxymethylglutaryl-CoA synthase, cytoplasmic	1.64879	6.98981	0.199368	-1.4126	-14.2254	3.54338	0.602879
Q8VBV3	Q8VBV3	EXOS2_MOUSE	Exosc2	Exosome complex component RRP4	9.72353	8.46873	0.199873	1.38183	-0.794745	3.30435	0.602879
Q80Y14	Q80Y14	GLRX5_MOUSE	Glrx5	Glutaredoxin-related protein 5, mitochondrial	20.4182	16.856	0.19992	1.39645	-2.31493	9.43933	0.602879
Q80WW9	Q80WW9	DDRGK_MOUSE	Ddrgk1	DDRGK domain-containing protein 1	12.1995	9.9948	0.199925	1.43906	-1.53907	5.94846	0.602879
Q99MN1	Q99MN1	SYK_MOUSE	Kars1	Lysine--tRNA ligase	33.8988	35.8289	0.199939	-1.39034	-5.10167	1.2415	0.602879
Q91X51	Q91X51	GORS1_MOUSE	Gorasp1	Golgi reassembly-stacking protein 1	2.62969	4.97771	0.200146	-1.37184	-6.16244	1.46639	0.602879
Q9DC70	Q9DC70	NDUS7_MOUSE	Ndufs7	NADH dehydrogenase [ubiquinone] iron-sulfur protein 7, mitochondrial	16.3355	11.1855	0.200221	1.4682	-3.78347	14.0833	0.602879
Q62431	Q62431	ARI3A_MOUSE	Arid3a	AT-rich interactive domain-containing protein 3A	4.18346	6.18174	0.200591	-1.44047	-5.40626	1.40971	0.602879
Q9CZR8	Q9CZR8	EFTS_MOUSE	Tsfm	Elongation factor Ts, mitochondrial	29.364	25.2927	0.200637	1.41226	-2.74167	10.8842	0.602879
Q8BH04	Q8BH04	PCKGM_MOUSE	Pck2	Phosphoenolpyruvate carboxykinase [GTP], mitochondrial	49.563	53.785	0.200688	-1.37347	-11.1055	2.6616	0.602879
Q9CZX9	Q9CZX9	EMC4_MOUSE	Emc4	ER membrane protein complex subunit 4	7.49755	10.1127	0.201336	-1.38504	-6.92561	1.69534	0.604335
Q791T5	Q791T5	MTCH1_MOUSE	Mtch1	Mitochondrial carrier homolog 1	28.3934	29.9307	0.201872	-1.36603	-4.04478	0.970281	0.604707
Q80VP1	Q80VP1	EPN1_MOUSE	Epn1	Epsin-1	7.55229	6.33045	0.201903	1.41276	-0.836322	3.28002	0.604707
Q925I1	Q925I1	ATAD3_MOUSE	Atad3	ATPase family AAA domain-containing protein 3	23.3741	21.4394	0.201999	1.413	-1.32637	5.19591	0.604707
Q8BL66	Q8BL66	EEA1_MOUSE	Eea1	Early endosome antigen 1	32.4705	35.4162	0.202389	-1.44611	-8.03575	2.14435	0.604707
O88448	O88448	KLC2_MOUSE	Klc2	Kinesin light chain 2	9.81596	10.7735	0.202465	-1.43768	-2.6031	0.688047	0.604707
Q9JIF0	Q9JIF0	ANM1_MOUSE	Prmt1	Protein arginine N-methyltransferase 1	19.8211	17.9121	0.202484	1.3748	-1.23272	5.05089	0.604707
Q0GA42	Q0GA42	CNNM1_MOUSE	Cnnm1	Metal transporter CNNM1	10.3484	15.275	0.202603	-1.45464	-13.4997	3.64643	0.604707
P70340;P97454	P70340;P97454	SMAD1_MOUSE;SMAD5_MOUSE	Smad1;Smad5	Mothers against decapentaplegic homolog 1	5.63231	7.59995	0.202947	-1.43822	-5.35881	1.42352	0.605033
P51150	P51150	RAB7A_MOUSE	Rab7a	Ras-related protein Rab-7a	250.211	263.64	0.203039	-1.36935	-35.5034	8.6461	0.605033
Q8CE50	Q8CE50	SNX30_MOUSE	Snx30	Sorting nexin-30	15.1696	17.1643	0.203816	-1.40746	-5.37427	1.3849	0.606789
Q8BGU5	Q8BGU5	CCNY_MOUSE	Ccny	Cyclin-Y	7.15364	9.38456	0.203956	-1.44837	-6.12354	1.6617	0.606789
Q3TIV5	Q3TIV5	ZC3HF_MOUSE	Zc3h15	Zinc finger CCCH domain-containing protein 15	7.28177	10.9171	0.20447	-1.38601	-9.72224	2.45167	0.607831
P46061	P46061	RAGP1_MOUSE	Rangap1	Ran GTPase-activating protein 1	18.1164	16.2317	0.205007	1.39331	-1.29564	5.06507	0.608509
P28271	P28271	ACOHC_MOUSE	Aco1	Cytoplasmic aconitate hydratase	32.4457	27.5592	0.205027	1.40378	-3.4212	13.1943	0.608509
Q9DBG6	Q9DBG6	RPN2_MOUSE	Rpn2	Dolichyl-diphosphooligosaccharide--protein glycosyltransferase subunit 2	94.8638	81.2733	0.205514	1.39027	-9.35049	36.5315	0.609424
Q9JIH2	Q9JIH2	NUP50_MOUSE	Nup50	Nuclear pore complex protein Nup50	10.0125	13.1263	0.205664	-1.4009	-8.41367	2.18607	0.609424
Q99LS3	Q99LS3	SERB_MOUSE	Psph	Phosphoserine phosphatase	18.1761	21.7999	0.206466	-1.35887	-9.63394	2.38614	0.610022
Q8CCB4	Q8CCB4	VPS53_MOUSE	Vps53	Vacuolar protein sorting-associated protein 53 homolog	14.7825	12.9995	0.206646	1.42029	-1.30935	4.87518	0.610022
Q8CEE7	Q8CEE7	RDH13_MOUSE	Rdh13	Retinol dehydrogenase 13	5.66357	6.54035	0.206649	-1.35056	-2.32357	0.570012	0.610022
Q3TIR3	Q3TIR3	RIC8A_MOUSE	Ric8a	Synembryn-A	7.31173	10.7979	0.20669	-1.43819	-9.61227	2.63992	0.610022
Q9JJL8	Q9JJL8	SYSM_MOUSE	Sars2	Serine--tRNA ligase, mitochondrial	5.98157	8.8074	0.206834	-1.42565	-7.75059	2.09893	0.610022
Q8C3J5	Q8C3J5	DOCK2_MOUSE	Dock2	Dedicator of cytokinesis protein 2	40.6912	37.4225	0.206992	1.38105	-2.25265	8.79005	0.610022
P15307	P15307	REL_MOUSE	Rel	Proto-oncogene c-Rel	25.0989	27.1932	0.207237	-1.37633	-5.62433	1.4356	0.610022
Q9CQJ4	O35730;Q9CQJ4	RING2_MOUSE	Rnf2	E3 ubiquitin-protein ligase RING2	2.53824	4.51174	0.207411	-1.3524	-5.24597	1.29897	0.610022
Q8BK63	Q8BK63	KC1A_MOUSE	Csnk1a1	Casein kinase I isoform alpha	11.2419	5.36633	0.207472	1.36136	-3.93281	15.6839	0.610022
Q9Z2G6	Q9Z2G6	SE1L1_MOUSE	Sel1l	Protein sel-1 homolog 1	41.9838	37.248	0.207513	1.38501	-3.30702	12.7786	0.610022
P55258	P55258	RAB8A_MOUSE	Rab8a	Ras-related protein Rab-8A	29.0746	32.0226	0.208498	-1.39159	-8.00315	2.10718	0.610944
Q8VHQ9	Q8VHQ9	ACO11_MOUSE	Acot11	Acyl-coenzyme A thioesterase 11	2.62078	6.09173	0.208678	-1.34608	-9.23478	2.29288	0.610944
O35711	O35711	LIPB2_MOUSE	Ppfibp2	Liprin-beta-2	11.7093	15.8176	0.208735	-1.43597	-11.3942	3.17757	0.610944
Q8VCF0	Q8VCF0	MAVS_MOUSE	Mavs	Mitochondrial antiviral-signaling protein	23.3899	25.3854	0.208856	-1.34334	-5.30546	1.31442	0.610944
Q99M28	Q99M28	RNPS1_MOUSE	Rnps1	RNA-binding protein with serine-rich domain 1	55.3869	50.7138	0.2092	1.35674	-3.16654	12.5127	0.610944
Q9WV96	Q9WV96	T10B_MOUSE	Timm10b	Mitochondrial import inner membrane translocase subunit Tim10 B	11.2501	13.0239	0.209215	-1.35115	-4.73771	1.19009	0.610944
Q6PFR5	Q6PFR5	TRA2A_MOUSE	Tra2a	Transformer-2 protein homolog alpha	13.7546	11.523	0.209266	1.42783	-1.71346	6.17672	0.610944
Q99LP6	Q99LP6	GRPE1_MOUSE	Grpel1	GrpE protein homolog 1, mitochondrial	56.6931	62.3462	0.209536	-1.34557	-15.0752	3.76895	0.610944
O70469	O70469	DOK2_MOUSE	Dok2	Docking protein 2	11.1203	9.40852	0.209543	1.39119	-1.23811	4.66172	0.610944
Q9D8W5	Q9D8W5	PSD12_MOUSE	Psmd12	26S proteasome non-ATPase regulatory subunit 12	39.2011	33.5745	0.20967	1.34728	-3.76897	15.0223	0.610944
P62962	P62962	PROF1_MOUSE	Pfn1	Profilin-1	999.627	1105.56	0.209855	-1.35019	-283.353	71.4887	0.610944
Q810A7	Q810A7	DDX42_MOUSE	Ddx42	ATP-dependent RNA helicase DDX42	15.9001	12.5566	0.210198	1.40194	-2.48348	9.17054	0.610944
Q8K411	Q8K411	PREP_MOUSE	Pitrm1	Presequence protease, mitochondrial	29.0591	30.1868	0.210322	-1.36229	-3.03753	0.782133	0.610944
Q921Z5	Q921Z5	TFIP8_MOUSE	Tnfaip8	Tumor necrosis factor alpha-induced protein 8	20.847	16.6665	0.210652	1.34606	-2.82667	11.1878	0.610944
Q62159	Q62159	RHOC_MOUSE	Rhoc	Rho-related GTP-binding protein RhoC	45.4349	55.1508	0.210664	-1.34151	-25.948	6.51606	0.610944
Q8C407	Q8C407	YIPF4_MOUSE	Yipf4	Protein YIPF4	16.8474	13.9105	0.210741	1.39897	-2.18443	8.05836	0.610944
P62862	P62862	RS30_MOUSE	Fau	40S ribosomal protein S30	40.8373	55.6293	0.210746	-1.35805	-39.8166	10.2326	0.610944
P58044	P58044	IDI1_MOUSE	Idi1	Isopentenyl-diphosphate Delta-isomerase 1	0.87516	2.46803	0.210795	-1.33773	-4.2483	1.06255	0.610944
P55302	P55302	AMRP_MOUSE	Lrpap1	Alpha-2-macroglobulin receptor-associated protein	33.1343	37.9777	0.211011	-1.33703	-12.9216	3.23487	0.611091
Q99L48	Q99L48	NMD3_MOUSE	Nmd3	60S ribosomal export protein NMD3	5.31447	7.16683	0.211375	-1.35171	-4.98096	1.27625	0.611666
Q8BYA0	Q8BYA0	TBCD_MOUSE	Tbcd	Tubulin-specific chaperone D	17.9495	16.6003	0.211707	1.36811	-0.961235	3.65957	0.61215
P17710	P17710	HXK1_MOUSE	Hk1	Hexokinase-1	124.357	116.896	0.21207	1.3374	-5.0494	19.9724	0.612714
Q3UV17	Q3UV17;P07744;Q8VED5;Q8BGZ7	K22O_MOUSE	Krt76	Keratin, type II cytoskeletal 2 oral	491.596	110.117	0.212233	1.42185	-300.513	1063.47	0.612714
P55937	P55937	GOGA3_MOUSE	Golga3	Golgin subfamily A member 3	10.593	13.7918	0.212452	-1.42008	-8.91651	2.51888	0.612867
Q91VM5	Q9WV02;Q91VM5	RMXL1_MOUSE	Rbmxl1	RNA binding motif protein, X-linked-like-1	31.7539	26.9298	0.212867	1.33778	-3.29757	12.9458	0.613548
Q99KP6	Q99KP6	PRP19_MOUSE	Prpf19	Pre-mRNA-processing factor 19	76.8191	71.39	0.213019	1.3382	-3.72065	14.5789	0.613548
P48036	P48036	ANXA5_MOUSE	Anxa5	Annexin A5	508.082	627.271	0.213425	-1.34797	-321.934	83.5566	0.614167
P26638	P26638	SYSC_MOUSE	Sars1	Serine--tRNA ligase, cytoplasmic	41.2503	45.8073	0.214276	-1.32707	-12.2185	3.10458	0.614167
P17563	P17563;Q63836	SBP1_MOUSE	Selenbp1	Methanethiol oxidase	29.0401	27.5451	0.214283	1.32793	-1.02021	4.01015	0.614167
Q02257	Q02257	PLAK_MOUSE	Jup	Junction plakoglobin	28.1418	2.35313	0.214325	1.41916	-20.7365	72.3138	0.614167
P56542	P56542	DNS2A_MOUSE	Dnase2	Deoxyribonuclease-2-alpha	50.6225	42.4962	0.214425	1.32571	-5.53194	21.7845	0.614167
P47757	P47757	CAPZB_MOUSE	Capzb	F-actin-capping protein subunit beta	126.476	134.778	0.214496	-1.36131	-22.6433	6.039	0.614167
Q00623	Q00623	APOA1_MOUSE	Apoa1	Apolipoprotein A-I	133.062	59.6479	0.214779	1.41312	-58.7374	205.566	0.614167
Q9ER80	Q9ER80	RTP4_MOUSE	Rtp4	Receptor-transporting protein 4	3.71045	6.27824	0.214951	-1.37528	-7.06132	1.92575	0.614167
P62075	P62075	TIM13_MOUSE	Timm13	Mitochondrial import inner membrane translocase subunit Tim13	15.5819	17.5691	0.21501	-1.3433	-5.38146	1.40716	0.614167
Q689Z5	Q689Z5;Q7TNB8	SBNO1_MOUSE	Sbno1	Protein strawberry notch homolog 1	0.348757	1.27111	0.215823	-1.34258	-2.50324	0.658528	0.614167
Q8K0D5	Q8K0D5	EFGM_MOUSE	Gfm1	Elongation factor G, mitochondrial	9.2035	12.1684	0.215939	-1.40673	-8.3085	2.37871	0.614167
Q9ET22	Q9ET22	DPP2_MOUSE	Dpp7	Dipeptidyl peptidase 2	146.175	132.502	0.216079	1.37977	-10.4762	37.8222	0.614167
O08664;Q921K9;Q9CXE2	Q921K9;Q9CXE2;O08664	BCL7A_MOUSE;BCL7B_MOUSE;BCL7C_MOUSE	Bcl7a;Bcl7b;Bcl7c	B-cell CLL/lymphoma 7 protein family member C	12.4198	16.1032	0.216554	-1.39171	-10.2661	2.89921	0.614167
O35516	O35516	NOTC2_MOUSE	Notch2	Neurogenic locus notch homolog protein 2	2.09136	3.71178	0.216648	-1.32177	-4.36457	1.12371	0.614167
P56391	P56391	CX6B1_MOUSE	Cox6b1	Cytochrome c oxidase subunit 6B1	57.8352	69.3369	0.216678	-1.33186	-31.1342	8.13093	0.614167
P02089	P02089	HBB2_MOUSE	Hbb-b2	Hemoglobin subunit beta-2	441.94	303.777	0.21673	1.40298	-111.165	387.491	0.614167
Q9D735	Q9D735	TRIR_MOUSE	Trir	Telomerase RNA component interacting RNase	6.5111	3.15638	0.216841	1.34396	-2.43007	9.13952	0.614167
Q8CJ53	Q8CJ53	CIP4_MOUSE	Trip10	Cdc42-interacting protein 4	6.80855	9.98586	0.217146	-1.37163	-8.78415	2.42954	0.614167
Q6NZB0	Q6NZB0	DNJC8_MOUSE	Dnajc8	DnaJ homolog subfamily C member 8	11.5307	10.3953	0.217225	1.33972	-0.819733	3.09063	0.614167
Q91Z31	Q91Z31	PTBP2_MOUSE	Ptbp2	Polypyrimidine tract-binding protein 2	31.6234	43.0879	0.217271	-1.3281	-31.0329	8.10379	0.614167
Q3UJB9	Q3UJB9	EDC4_MOUSE	Edc4	Enhancer of mRNA-decapping protein 4	24.3108	20.8828	0.217602	1.3535	-2.54978	9.40581	0.614167
P62737;P63268	P62737;P63268;P68033	ACTA_MOUSE;ACTH_MOUSE	Acta2;Actg2	Actin, aortic smooth muscle	991.703	1132.77	0.217861	-1.3162	-380.3	98.1722	0.614167
Q99LC8	Q99LC8	EI2BA_MOUSE	Eif2b1	Translation initiation factor eIF-2B subunit alpha	2.68122	4.42469	0.217873	-1.39274	-4.88341	1.39648	0.614167
Q8BJS4	Q8BJS4	SUN2_MOUSE	Sun2	SUN domain-containing protein 2	38.8527	32.7824	0.217887	1.40369	-4.95816	17.0989	0.614167
P36916	P36916	GNL1_MOUSE	Gnl1	Guanine nucleotide-binding protein-like 1	11.4038	10.7249	0.217912	1.3318	-0.486817	1.84454	0.614167
Q9DC61	Q9DC61	MPPA_MOUSE	Pmpca	Mitochondrial-processing peptidase subunit alpha	23.8449	25.3277	0.217912	-1.3574	-4.08036	1.11486	0.614167
Q8CGY8	Q8CGY8	OGT1_MOUSE	Ogt	UDP-N-acetylglucosamine--peptide N-acetylglucosaminyltransferase 110 kDa subunit	6.64486	9.71982	0.218055	-1.39045	-8.60823	2.4583	0.614167
Q9CXD6	Q9CXD6	MCUR1_MOUSE	Mcur1	Mitochondrial calcium uniporter regulator 1	1.96903	3.82519	0.218186	-1.36721	-5.13768	1.42537	0.614167
Q61337	Q61337	BAD_MOUSE	Bad	Bcl2-associated agonist of cell death	1.77045	4.7176	0.218556	-1.32785	-8.0079	2.11361	0.614167
Q91W89	Q91W89	MA2C1_MOUSE	Man2c1	Alpha-mannosidase 2C1	11.9109	8.99534	0.218609	1.382	-2.31102	8.14217	0.614167
Q8BYK6	Q8BYK6;Q91YT7;P59326	YTHD3_MOUSE	Ythdf3	YTH domain-containing family protein 3	3.56913	5.45221	0.218641	-1.32399	-5.1082	1.34205	0.614167
Q8K2C6	Q8K2C6	SIR5_MOUSE	Sirt5	NAD-dependent protein deacylase sirtuin-5, mitochondrial	1.5205	2.83857	0.218743	-1.31269	-3.55673	0.920581	0.614167
P04228	P14435;P23150;P14434;P01910;P14436;P14437;P14438;P04228	HA2D_MOUSE	H2-Aa	H-2 class II histocompatibility antigen, A-D alpha chain	9.14788	13.5789	0.218798	-1.36502	-12.2758	3.41365	0.614167
Q8CI75	Q8CI75	DI3L2_MOUSE	Dis3l2	DIS3-like exonuclease 2	6.12263	8.99342	0.218923	-1.38183	-8.02489	2.28331	0.614167
Q9JJ89	Q9JJ89	CCD86_MOUSE	Ccdc86	Coiled-coil domain-containing protein 86	0.734487	2.40366	0.219131	-1.35723	-4.61104	1.2727	0.614167
B1AY13	B1AY13	UBP24_MOUSE	Usp24	Ubiquitin carboxyl-terminal hydrolase 24	5.29653	8.64137	0.219328	-1.39592	-9.43095	2.74127	0.614167
P02463	P02463	CO4A1_MOUSE	Col4a1	Collagen alpha-1(IV) chain	18.9793	13.6158	0.219369	1.34963	-4.04397	14.7709	0.614167
Q9D1K7	Q9D1K7	CT027_MOUSE		UPF0687 protein C20orf27 homolog	7.00295	9.32556	0.21963	-1.34144	-6.37527	1.73005	0.614432
Q8BWW4	Q8BWW4	LARP4_MOUSE	Larp4	La-related protein 4	15.9634	14.6172	0.22015	1.32127	-0.971302	3.6636	0.615186
E9Q394	E9Q394	AKP13_MOUSE	Akap13	A-kinase anchor protein 13	7.70882	11.2808	0.220387	-1.38315	-10.0414	2.89747	0.615186
Q99KN9	Q99KN9	EPN4_MOUSE	Clint1	Clathrin interactor 1	31.3933	27.6383	0.220397	1.36246	-2.93395	10.4439	0.615186
Q6ZQ08	Q6ZQ08	CNOT1_MOUSE	Cnot1	CCR4-NOT transcription complex subunit 1	6.47605	9.4082	0.220589	-1.39596	-8.30378	2.43948	0.615258
P47713	P47713	PA24A_MOUSE	Pla2g4a	Cytosolic phospholipase A2	15.702	18.6917	0.220786	-1.30664	-8.09275	2.11335	0.615345
P51881	P51881;Q3V132;P48962	ADT2_MOUSE	Slc25a5	ADP/ATP translocase 2	267.775	308.962	0.221078	-1.30581	-111.538	29.1653	0.615694
Q64092	Q64092	TFE3_MOUSE	Tfe3	Transcription factor E3	5.25272	8.58497	0.221679	-1.30435	-9.03387	2.36938	0.616905
Q3TYS2	Q3TYS2	CYBC1_MOUSE	Cybc1	Cytochrome b-245 chaperone 1	54.5849	48.8866	0.22209	1.31484	-4.15366	15.5502	0.617252
P80318	P80318	TCPG_MOUSE	Cct3	T-complex protein 1 subunit gamma	162.202	177.786	0.222181	-1.35974	-43.5408	12.3721	0.617252
Q80X82	Q80X82	SYMPK_MOUSE	Sympk	Symplekin	0	3.79823	0.222304	-1.39328	-10.8059	3.20947	0.617252
Q8BLK9	Q8BLK9	KS6C1_MOUSE	Rps6kc1	Ribosomal protein S6 kinase delta-1	2.39464	4.2269	0.223219	-1.30222	-4.98516	1.32063	0.619101
Q9DCD0	Q9DCD0	6PGD_MOUSE	Pgd	6-phosphogluconate dehydrogenase, decarboxylating	539.339	595.409	0.223304	-1.31915	-153.933	41.7918	0.619101
Q3THK7	Q3THK7	GUAA_MOUSE	Gmps	GMP synthase [glutamine-hydrolyzing]	22.3416	20.056	0.223574	1.32801	-1.73793	6.30913	0.619384
P51125	P51125	ICAL_MOUSE	Cast	Calpastatin	36.0033	39.216	0.224127	-1.29833	-8.74763	2.32226	0.619957
O70475	O70475	UGDH_MOUSE	Ugdh	UDP-glucose 6-dehydrogenase	22.4008	19.0939	0.224196	1.30734	-2.43437	9.04817	0.619957
Q9QZD9	Q9QZD9	EIF3I_MOUSE	Eif3i	Eukaryotic translation initiation factor 3 subunit I	33.5289	35.9246	0.224283	-1.29545	-6.51625	1.72502	0.619957
Q9JI75	Q9JI75	NQO2_MOUSE	Nqo2	Ribosyldihydronicotinamide dehydrogenase [quinone]	25.6216	23.8734	0.224573	1.29501	-1.26199	4.75852	0.619969
Q9QXK7	Q9QXK7	CPSF3_MOUSE	Cpsf3	Cleavage and polyadenylation specificity factor subunit 3	13.7775	10.9535	0.224812	1.35809	-2.30491	7.95278	0.619969
O88879	O88879	APAF_MOUSE	Apaf1	Apoptotic protease-activating factor 1	4.07866	6.68893	0.224952	-1.36735	-7.39137	2.17084	0.619969
P46718	P46718	PDCD2_MOUSE	Pdcd2	Programmed cell death protein 2	4.66439	6.73392	0.224956	-1.3797	-5.89966	1.76061	0.619969
Q9QZQ1	Q9QZQ1	AFAD_MOUSE	Afdn	Afadin	13.2081	12.2779	0.225197	1.36916	-0.7784	2.63877	0.62017
Q8R3V5	Q8R3V5	SHLB2_MOUSE	Sh3glb2	Endophilin-B2	12.9225	17.0883	0.225541	-1.34495	-11.6778	3.34613	0.620657
Q8VBW6	Q8VBW6	ULA1_MOUSE	Nae1	NEDD8-activating enzyme E1 regulatory subunit	14.5127	19.2374	0.226037	-1.34946	-13.2988	3.84943	0.620885
P00375	P00375	DYR_MOUSE	Dhfr	Dihydrofolate reductase	29.1929	30.9658	0.226053	-1.29296	-4.84205	1.29635	0.620885
P53810	P53810	PIPNA_MOUSE	Pitpna	Phosphatidylinositol transfer protein alpha isoform	66.7571	73.6927	0.226263	-1.3156	-19.1838	5.31252	0.620885
Q9JHS9	Q9JHS9	CWC15_MOUSE	Cwc15	Spliceosome-associated protein CWC15 homolog	2.72118	0.702397	0.226356	1.31813	-1.55554	5.59311	0.620885
Q6ZWY8	Q6ZWY8	TYB10_MOUSE	Tmsb10	Thymosin beta-10	1.8546	3.57086	0.226462	-1.29116	-4.68893	1.2564	0.620885
Q60931	Q60931	VDAC3_MOUSE	Vdac3	Voltage-dependent anion-selective channel protein 3	68.3323	59.8449	0.227013	1.36926	-7.25663	24.2314	0.621569
Q9Z2X1	Q9Z2X1	HNRPF_MOUSE	Hnrnpf	Heterogeneous nuclear ribonucleoprotein F	87.7486	83.9356	0.227047	1.29034	-2.80551	10.4315	0.621569
Q99N87	Q99N87	RT05_MOUSE	Mrps5	28S ribosomal protein S5, mitochondrial	7.41624	9.5901	0.227359	-1.35944	-6.18019	1.83248	0.621942
P47857	P47857	PFKAM_MOUSE	Pfkm	ATP-dependent 6-phosphofructokinase, muscle type	14.9227	21.6187	0.227519	-1.34899	-18.9376	5.54557	0.621942
P53564	P70403;P53564	CUX1_MOUSE	Cux1	Homeobox protein cut-like 1	11.1578	14.5412	0.227692	-1.32433	-9.44603	2.67923	0.621956
Q9JLT4	Q9JLT4	TRXR2_MOUSE	Txnrd2	Thioredoxin reductase 2, mitochondrial	14.696	16.9035	0.22831	-1.34256	-6.2379	1.82287	0.623185
Q8K370	Q8K370	ACD10_MOUSE	Acad10	Acyl-CoA dehydrogenase family member 10	24.0275	21.8987	0.228572	1.31344	-1.66744	5.92498	0.623439
Q9ESW4	Q9ESW4	AGK_MOUSE	Agk	Acylglycerol kinase, mitochondrial	24.0693	21.4317	0.228799	1.28779	-1.96981	7.24495	0.6236
Q8R1A4	Q8R1A4	DOCK7_MOUSE	Dock7	Dedicator of cytokinesis protein 7	4.59895	6.82643	0.229015	-1.31343	-6.20859	1.75364	0.623729
P70296	P70296	PEBP1_MOUSE	Pebp1	Phosphatidylethanolamine-binding protein 1	86.3966	79.495	0.229627	1.30551	-5.38793	19.1911	0.624936
Q8C0L8	Q8C0L8	COG5_MOUSE	Cog5	Conserved oligomeric Golgi complex subunit 5	12.6201	13.8854	0.229907	-1.30348	-3.51763	0.987026	0.625238
P57716	P57716	NICA_MOUSE	Ncstn	Nicastrin	37.0312	41.4302	0.230697	-1.28161	-12.1138	3.31585	0.62622
Q8K1E6	Q8K1E6	ALKB3_MOUSE	Alkbh3	Alpha-ketoglutarate-dependent dioxygenase alkB homolog 3	9.30087	13.4064	0.230907	-1.34408	-11.7151	3.50395	0.62622
Q9EPQ7	Q9EPQ7	STAR5_MOUSE	Stard5	StAR-related lipid transfer protein 5	18.3769	16.855	0.230924	1.29873	-1.18992	4.23376	0.62622
P17426	P17426	AP2A1_MOUSE	Ap2a1	AP-2 complex subunit alpha-1	35.376	32.6022	0.231085	1.30847	-2.21464	7.76214	0.62622
O08807	O08807	PRDX4_MOUSE	Prdx4	Peroxiredoxin-4	221.21	233.232	0.231113	-1.29696	-33.4308	9.3868	0.62622
P20108	P20108	PRDX3_MOUSE	Prdx3	Thioredoxin-dependent peroxide reductase, mitochondrial	107.838	123.658	0.231788	-1.27435	-43.539	11.8986	0.627257
Q9JHJ0	Q9JHJ0	TMOD3_MOUSE	Tmod3	Tropomodulin-3	29.7136	31.0618	0.231835	-1.34695	-3.86564	1.16937	0.627257
Q8CI94	Q9WUB3;Q8CI94;Q9ET01	PYGB_MOUSE	Pygb	Glycogen phosphorylase, brain form	95.8112	90.1516	0.233265	1.28354	-4.40914	15.7284	0.630667
Q9Z1N5	Q8VDW0;Q9Z1N5	DX39B_MOUSE	Ddx39b	Spliceosome RNA helicase Ddx39b	112.348	118.349	0.233581	-1.311	-16.9572	4.95495	0.631062
Q8K2L8	Q8K2L8	TPC12_MOUSE	Trappc12	Trafficking protein particle complex subunit 12	15.3758	14.4043	0.233827	1.3411	-0.852752	2.79569	0.631264
P97470	P97470	PP4C_MOUSE	Ppp4c	Serine/threonine-protein phosphatase 4 catalytic subunit	8.0723	10.9122	0.234176	-1.29668	-7.97471	2.29488	0.631747
A1L314	A1L314	MPEG1_MOUSE	Mpeg1	Macrophage-expressed gene 1 protein	90.9465	104.137	0.235277	-1.3169	-37.6156	11.2341	0.634255
P70671	P70671	IRF3_MOUSE	Irf3	Interferon regulatory factor 3	9.04235	5.651	0.235457	1.26247	-2.59496	9.37764	0.634278
Q80TY0	Q80TY0	FNBP1_MOUSE	Fnbp1	Formin-binding protein 1	12.1338	10.1463	0.23603	1.28251	-1.59433	5.56935	0.63536
E9Q735	E9Q735	UBE4A_MOUSE	Ube4a	Ubiquitin conjugation factor E4 A	4.69122	6.7785	0.236269	-1.31459	-5.96444	1.78987	0.635542
P97363	P97363	SPTC2_MOUSE	Sptlc2	Serine palmitoyltransferase 2	17.9061	23.3545	0.236577	-1.30818	-15.5264	4.62952	0.635908
Q9Z1Q5	Q9Z1Q5	CLIC1_MOUSE	Clic1	Chloride intracellular channel protein 1	390.82	436.698	0.237433	-1.2586	-127.364	35.6072	0.637062
Q9CQL7	Q9CQL7	MOFA1_MOUSE	Mrfap1	MORF4 family-associated protein 1	7.66002	8.47801	0.237657	-1.30041	-2.32885	0.692873	0.637062
Q8K2Q0	Q8K2Q0	COMD9_MOUSE	Commd9	COMM domain-containing protein 9	26.798	31.3624	0.237684	-1.26107	-12.6993	3.57064	0.637062
Q9WV68	Q9WV68	DECR2_MOUSE	Decr2	Peroxisomal 2,4-dienoyl-CoA reductase [(3E)-enoyl-CoA-producing]	9.42085	8.08917	0.237748	1.26081	-1.04195	3.70532	0.637062
Q8BU30	Q8BU30	SYIC_MOUSE	Iars1	Isoleucine--tRNA ligase, cytoplasmic	42.7646	45.3978	0.238075	-1.29989	-7.5051	2.23873	0.637062
Q8JZR0	Q8JZR0	ACSL5_MOUSE	Acsl5	Long-chain-fatty-acid--CoA ligase 5	16.0399	17.2005	0.238284	-1.30205	-3.31466	0.993393	0.637062
Q8BHG1	Q8BHG1	NRDC_MOUSE	Nrdc	Nardilysin	19.0852	17.6434	0.238349	1.25504	-1.12225	4.00581	0.637062
P63280	P63280	UBC9_MOUSE	Ube2i	SUMO-conjugating enzyme UBC9	29.2064	33.1516	0.238382	-1.25396	-10.9553	3.06506	0.637062
Q80SW1	Q80SW1	SAHH2_MOUSE	Ahcyl1	S-adenosylhomocysteine hydrolase-like protein 1	34.4239	30.3651	0.238754	1.26802	-3.25976	11.3773	0.637596
P11835	P11835	ITB2_MOUSE	Itgb2	Integrin beta-2	320.593	348.343	0.239505	-1.27154	-78.1389	22.6392	0.638831
P07146	P07146	TRY2_MOUSE	Prss2	Anionic trypsin-2	29.0669	4.97283	0.239562	1.33105	-22.1615	70.3496	0.638831
Q8BG84	Q8BG84	LAIR1_MOUSE	Lair1	Leukocyte-associated immunoglobulin-like receptor 1	5.07136	7.51	0.239865	-1.27922	-6.90653	2.02925	0.639179
P63154	P63154	CRNL1_MOUSE	Crnkl1	Crooked neck-like protein 1	3.56275	5.81131	0.240258	-1.28393	-6.3947	1.89756	0.639435
P25911	P25911	LYN_MOUSE	Lyn	Tyrosine-protein kinase Lyn	39.0872	36.285	0.240306	1.29747	-2.4319	8.03646	0.639435
P05555	P05555	ITAM_MOUSE	Itgam	Integrin alpha-M	137.584	130.168	0.24122	1.25028	-5.90179	20.7338	0.640807
Q9D8T2	Q9D8T2	GSDMD_MOUSE	Gsdmd	Gasdermin-D	57.8312	63.5563	0.241315	-1.28586	-16.359	4.90879	0.640807
Q9CQ45	Q9CQ45	NENF_MOUSE	Nenf	Neudesin	0.328578	1.16481	0.241625	-1.26503	-2.36184	0.689375	0.640807
P37040	P37040	NCPR_MOUSE	Por	NADPH--cytochrome P450 reductase	189.338	194.657	0.241689	-1.24855	-14.8783	4.23997	0.640807
Q8BH43	Q8BH43	WASF2_MOUSE	Wasf2	Wiskott-Aldrich syndrome protein family member 2	90.0965	95.0467	0.24176	-1.24602	-13.8284	3.92803	0.640807
Q3UMY5	Q3UMY5	EMAL4_MOUSE	Eml4	Echinoderm microtubule-associated protein-like 4	4.18776	5.37409	0.242161	-1.2997	-3.42889	1.05623	0.640807
O88544	O88544	CSN4_MOUSE	Cops4	COP9 signalosome complex subunit 4	12.8101	11.276	0.242178	1.31408	-1.40613	4.47429	0.640807
G5E8V9	G5E8V9	ARFP1_MOUSE	Arfip1	Arfaptin-1	13.0326	10.0143	0.242267	1.3057	-2.72328	8.7599	0.640807
P00688	P00688	AMYP_MOUSE	Amy2	Pancreatic alpha-amylase	105.15	11.7576	0.242379	1.32491	-87.6659	274.451	0.640807
P54923	P54923	ADPRH_MOUSE	Adprh	ADP-ribosylhydrolase ARH1	49.9811	46.7662	0.243035	1.27636	-2.75649	9.18636	0.641886
Q9CY16	Q9CY16	RT28_MOUSE	Mrps28	28S ribosomal protein S28, mitochondrial	16.0583	14.3618	0.24319	1.31202	-1.56657	4.95947	0.641886
Q8BGD9	Q8BGD9	IF4B_MOUSE	Eif4b	Eukaryotic translation initiation factor 4B	113.302	124.737	0.243307	-1.28226	-32.823	9.95403	0.641886
Q9CQK7	Q9CQK7	RWDD1_MOUSE	Rwdd1	RWD domain-containing protein 1	3.17707	5.47817	0.243648	-1.24302	-6.45517	1.85297	0.642329
Q9D8B4	Q9D8B4	NDUAB_MOUSE	Ndufa11	NADH dehydrogenase [ubiquinone] 1 alpha subcomplex subunit 11	6.14908	9.86055	0.244097	-1.30321	-10.8251	3.40216	0.642562
P49919	P49919	CDN1C_MOUSE	Cdkn1c	Cyclin-dependent kinase inhibitor 1C	0.840152	2.72439	0.244485	-1.2479	-5.31586	1.54739	0.642562
P27659	P27659	RL3_MOUSE	Rpl3	60S ribosomal protein L3	97.7432	93.0808	0.244497	1.23702	-3.74204	13.0669	0.642562
Q9JLV6	Q9JLV6	PNKP_MOUSE	Pnkp	Bifunctional polynucleotide phosphatase/kinase	14.531	16.3994	0.24454	-1.24496	-5.26279	1.52586	0.642562
Q9D8S4	Q9D8S4	ORN_MOUSE	Rexo2	Oligoribonuclease, mitochondrial	24.701	26.8638	0.244683	-1.24625	-6.09959	1.77389	0.642562
Q7TMY8	Q7TMY8	HUWE1_MOUSE	Huwe1	E3 ubiquitin-protein ligase HUWE1	8.40656	10.835	0.244777	-1.2659	-6.93475	2.07785	0.642562
P19001	P19001	K1C19_MOUSE	Krt19	Keratin, type I cytoskeletal 19	69.2922	22.9379	0.245604	1.3054	-43.419	136.128	0.644276
Q99ME9	Q99ME9	GTPB4_MOUSE	Gtpbp4	GTP-binding protein 4	14.3728	12.3914	0.246018	1.25775	-1.69004	5.65294	0.644905
P97310	P97310	MCM2_MOUSE	Mcm2	DNA replication licensing factor MCM2	24.5352	26.8518	0.246522	-1.23193	-6.51416	1.88093	0.64577
Q8R395	Q8R395	COMD5_MOUSE	Commd5	COMM domain-containing protein 5	21.9852	28.0276	0.246953	-1.28828	-17.6345	5.5498	0.646166
P68372	Q9D6F9;P68372;P99024	TBB4B_MOUSE	Tubb4b	Tubulin beta-4B chain	1126.94	1251.74	0.24737	-1.24419	-354.606	105.005	0.646166
O35704	O35704	SPTC1_MOUSE	Sptlc1	Serine palmitoyltransferase 1	17.9603	15.6381	0.247679	1.26271	-2.03901	6.68337	0.646166
Q91X79	Q91X79	CELA1_MOUSE	Cela1	Chymotrypsin-like elastase family member 1	33.4909	0	0.247753	1.30808	-32.3242	99.3061	0.646166
P97371	P97371	PSME1_MOUSE	Psme1	Proteasome activator complex subunit 1	144.267	167.45	0.247758	-1.24046	-65.8001	19.4347	0.646166
Q8C1A5	Q8C1A5	THOP1_MOUSE	Thop1	Thimet oligopeptidase	26.6336	25.1577	0.247969	1.23387	-1.22275	4.17452	0.646166
Q3UMB9	Q3UMB9	WASC4_MOUSE	Washc4	WASH complex subunit 4	31.8843	26.6945	0.248038	1.26032	-4.55234	14.9319	0.646166
Q9WUM5	Q9WUM5	SUCA_MOUSE	Suclg1	Succinate--CoA ligase [ADP/GDP-forming] subunit alpha, mitochondrial	47.6699	53.1523	0.248205	-1.23567	-15.5365	4.57167	0.646166
O88939	O88939	ZBT7A_MOUSE	Zbtb7a	Zinc finger and BTB domain-containing protein 7A	6.98661	3.56033	0.248538	1.23363	-2.85509	9.70765	0.646166
D3YZP9	D3YZP9	CCDC6_MOUSE	Ccdc6	Coiled-coil domain-containing protein 6	7.88501	10.0304	0.248562	-1.27148	-6.22876	1.93791	0.646166
O08573	O08573	LEG9_MOUSE	Lgals9	Galectin-9	16.0557	19.9386	0.248801	-1.22462	-10.9482	3.18244	0.646166
P55096	P55096	ABCD3_MOUSE	Abcd3	ATP-binding cassette sub-family D member 3	19.7212	24.8035	0.248899	-1.25211	-14.5883	4.42364	0.646166
Q8R1I1	Q8R1I1	QCR9_MOUSE	Uqcr10	Cytochrome b-c1 complex subunit 9	3.86242	7.25189	0.248941	-1.22756	-9.57905	2.80011	0.646166
Q3TKT4	Q3TKT4;Q6DIC0	SMCA4_MOUSE	Smarca4	Transcription activator BRG1	12.4884	11.2421	0.249481	1.28527	-1.1707	3.66336	0.646238
Q9JKV5	Q9JKV5	SCAM4_MOUSE	Scamp4	Secretory carrier-associated membrane protein 4	19.43	17.0176	0.249654	1.24592	-2.08974	6.9145	0.646238
Q9D8Z1	Q9D8Z1	ASCC1_MOUSE	Ascc1	Activating signal cointegrator 1 complex subunit 1	12.9477	10.0511	0.249667	1.27283	-2.65668	8.44983	0.646238
P52927	P52927	HMGA2_MOUSE	Hmga2	High mobility group protein HMGI-C	35.6267	27.8038	0.249692	1.22467	-6.47576	22.1215	0.646238
Q6PGG2	Q6PGG2	GMIP_MOUSE	Gmip	GEM-interacting protein	11.867	10.5332	0.249842	1.22547	-1.10791	3.77561	0.646238
Q8BN82	Q8BN82	S17A5_MOUSE	Slc17a5	Sialin	6.72978	5.59479	0.250334	1.27157	-1.04607	3.31605	0.646927
P68037	P68037	UB2L3_MOUSE	Ube2l3	Ubiquitin-conjugating enzyme E2 L3	18.5375	12.3775	0.250457	1.22506	-5.14681	17.4667	0.646927
Q9WUA2	Q9WUA2	SYFB_MOUSE	Farsb	Phenylalanine--tRNA ligase beta subunit	41.5299	44.2018	0.250783	-1.21917	-7.55567	2.21187	0.647318
Q91VC9	Q91VC9	GHITM_MOUSE	Ghitm	Growth hormone-inducible transmembrane protein	16.2127	20.5023	0.25143	-1.22923	-12.2348	3.65573	0.648534
P56873	P56873	ZNRD2_MOUSE	Znrd2	Protein ZNRD2	13.7153	18.1462	0.252253	-1.2631	-12.9608	4.09886	0.649762
Q8JZM7	Q8JZM7	CDC73_MOUSE	Cdc73	Parafibromin	3.97282	5.74132	0.252359	-1.28292	-5.24482	1.70781	0.649762
Q6P9Q6	Q6P9Q6	FKB15_MOUSE	Fkbp15	FK506-binding protein 15	21.1811	18.5725	0.252432	1.2227	-2.21612	7.43328	0.649762
Q9D6K7	Q9D6K7	TTC33_MOUSE	Ttc33	Tetratricopeptide repeat protein 33	0.648795	2.0102	0.252962	-1.22089	-3.88156	1.15875	0.650674
Q9Z130	Q9Z130	HNRDL_MOUSE	Hnrnpdl	Heterogeneous nuclear ribonucleoprotein D-like	24.9457	27.0873	0.253287	-1.21886	-6.10449	1.82123	0.650975
Q8K2Q5	Q8K2Q5	CHCH7_MOUSE	Chchd7	Coiled-coil-helix-coiled-coil-helix domain-containing protein 7	4.74842	6.75909	0.253475	-1.27074	-5.93788	1.91653	0.650975
Q8CGC7	Q8CGC7	SYEP_MOUSE	Eprs1	Bifunctional glutamate/proline--tRNA ligase	48.1453	52.3359	0.253606	-1.25387	-12.2403	3.85905	0.650975
O35604	O35604	NPC1_MOUSE	Npc1	NPC intracellular cholesterol transporter 1	131.521	123.63	0.25421	1.24322	-7.1489	22.9292	0.652073
O89001	O89001	CBPD_MOUSE	Cpd	Carboxypeptidase D	20.8358	22.7597	0.254716	-1.20996	-5.47748	1.62961	0.652485
Q9CPU0	Q9CPU0	LGUL_MOUSE	Glo1	Lactoylglutathione lyase	35.4884	38.2114	0.254924	-1.22297	-7.82521	2.37921	0.652485
P54227	P54227	STMN1_MOUSE	Stmn1	Stathmin	93.1669	113.642	0.255321	-1.22176	-58.8698	17.9204	0.652485
Q9Z0N1	Q9Z0N1;Q9Z0N2	IF2G_MOUSE	Eif2s3x	Eukaryotic translation initiation factor 2 subunit 3, X-linked	41.4638	46.5863	0.255454	-1.24277	-14.9466	4.70145	0.652485
Q8VC03	Q8VC03	EMAL3_MOUSE	Eml3	Echinoderm microtubule-associated protein-like 3	11.7357	10.4808	0.25563	1.23181	-1.12672	3.63648	0.652485
Q9CPX6	Q9CPX6	ATG3_MOUSE	Atg3	Ubiquitin-like-conjugating enzyme ATG3	28.2475	29.9495	0.255719	-1.24326	-4.9723	1.56836	0.652485
Q8R5C5	Q8R5C5	ACTY_MOUSE	Actr1b	Beta-centractin	36.1566	24.6854	0.256105	1.23577	-10.4442	33.3867	0.652485
Q9D110	Q9D110	MTHFS_MOUSE	Mthfs	5-formyltetrahydrofolate cyclo-ligase	8.28297	9.18398	0.256206	-1.21189	-2.58112	0.779106	0.652485
Q810U5	Q810U5	CCD50_MOUSE	Ccdc50	Coiled-coil domain-containing protein 50	11.2663	9.55795	0.256405	1.26064	-1.64708	5.06384	0.652485
O08756	O08756	HCD2_MOUSE	Hsd17b10	3-hydroxyacyl-CoA dehydrogenase type-2	72.679	77.9363	0.256494	-1.20615	-15.0171	4.50236	0.652485
O55234	O55234	PSB5_MOUSE	Psmb5	Proteasome subunit beta type-5	8.24931	10.4681	0.256647	-1.25332	-6.54912	2.11147	0.652485
O08788	O08788	DCTN1_MOUSE	Dctn1	Dynactin subunit 1	44.2199	46.3297	0.256651	-1.20314	-6.01722	1.79772	0.652485
Q9CQC7	Q9CQC7	NDUB4_MOUSE	Ndufb4	NADH dehydrogenase [ubiquinone] 1 beta subcomplex subunit 4	29.4439	26.5752	0.256661	1.24621	-2.68855	8.42588	0.652485
P14733	P14733	LMNB1_MOUSE	Lmnb1	Lamin-B1	85.9975	80.3918	0.25724	1.25907	-5.43702	16.6484	0.653509
Q61207	Q61207	SAP_MOUSE	Psap	Prosaposin	654.024	572.087	0.257685	1.20413	-70.7703	234.644	0.654191
Q6ZWX6	Q6ZWX6	IF2A_MOUSE	Eif2s1	Eukaryotic translation initiation factor 2 subunit 1	73.6684	76.5283	0.258162	-1.19904	-8.17481	2.45488	0.654952
Q9JHS3	Q9JHS3	LTOR2_MOUSE	Lamtor2	Ragulator complex protein LAMTOR2	45.1757	51.4368	0.25852	-1.21044	-18.0579	5.53552	0.655413
Q61425	Q61425	HCDH_MOUSE	Hadh	Hydroxyacyl-coenzyme A dehydrogenase, mitochondrial	42.1891	49.3237	0.258982	-1.20061	-20.4702	6.20103	0.655552
Q6Y5D8	Q6Y5D8	RHG10_MOUSE	Arhgap10	Rho GTPase-activating protein 10	6.38393	9.08259	0.259236	-1.26746	-8.12304	2.72571	0.655552
P47809	P47809	MP2K4_MOUSE	Map2k4	Dual specificity mitogen-activated protein kinase kinase 4	5.58514	7.9059	0.259372	-1.24751	-6.88978	2.24826	0.655552
P47811	P47811	MK14_MOUSE	Mapk14	Mitogen-activated protein kinase 14	40.9299	37.8648	0.25941	1.21745	-2.77983	8.91013	0.655552
Q5XKN4	Q5XKN4	JAGN1_MOUSE	Jagn1	Protein jagunal homolog 1	0.483367	1.42423	0.259673	-1.19914	-2.70293	0.821218	0.655552
P09925	P09925	SURF1_MOUSE	Surf1	Surfeit locus protein 1	6.79043	9.64549	0.259944	-1.25603	-8.54591	2.83579	0.655552
Q9WTZ1	Q9WTZ1	RBX2_MOUSE	Rnf7	RING-box protein 2	21.2341	19.0651	0.26001	1.20026	-1.905	6.24304	0.655552
Q06185	Q06185	ATP5I_MOUSE	Atp5me	ATP synthase subunit e, mitochondrial	71.1386	78.5353	0.260296	-1.19439	-21.224	6.43059	0.655552
Q6TEK5	Q6TEK5	VKORL_MOUSE	Vkorc1l1	Vitamin K epoxide reductase complex subunit 1-like protein 1	17.1971	22.1877	0.260302	-1.20847	-14.4605	4.4794	0.655552
Q9Z1M0	Q9Z1M0	P2RX7_MOUSE	P2rx7	P2X purinoceptor 7	25.2376	23.6076	0.260522	1.19599	-1.42578	4.68584	0.655552
Q9JHI5	Q9JHI5	IVD_MOUSE	Ivd	Isovaleryl-CoA dehydrogenase, mitochondrial	26.6454	28.4326	0.260522	-1.19808	-5.14516	1.57072	0.655552
Q8BXZ1	Q8BXZ1	TMX3_MOUSE	Tmx3	Protein disulfide-isomerase TMX3	37.8482	40.7297	0.261671	-1.18964	-8.27842	2.51549	0.657774
Q8BGA2	Q8BGA2	LHPL2_MOUSE	Lhfpl2	LHFPL tetraspan subfamily member 2 protein	4.83901	8.06582	0.261895	-1.19187	-9.29196	2.83834	0.657774
Q8VD62	Q8VD62	CK068_MOUSE	Bles03	UPF0696 protein C11orf68 homolog	18.7213	21.9152	0.261991	-1.1912	-9.19576	2.80799	0.657774
Q9CQW1	Q9CQW1	YKT6_MOUSE	Ykt6	Synaptobrevin homolog YKT6	18.6301	14.6257	0.262222	1.19219	-3.53753	11.5465	0.657774
P24270	P24270	CATA_MOUSE	Cat	Catalase	166.899	181.996	0.262366	-1.22085	-44.4456	14.2532	0.657774
Q6P5F9	Q6P5F9	XPO1_MOUSE	Xpo1	Exportin-1	16.1342	17.4889	0.26247	-1.22115	-3.99089	1.28142	0.657774
Q99J45	Q99J45	NRBP_MOUSE	Nrbp1	Nuclear receptor-binding protein	6.02494	7.82148	0.263105	-1.20309	-5.23587	1.6428	0.658639
Q99KN1	Q99KN1	ARRD1_MOUSE	Arrdc1	Arrestin domain-containing protein 1	6.85231	5.0845	0.263171	1.24905	-1.79304	5.32865	0.658639
P48025	P48025	KSYK_MOUSE	Syk	Tyrosine-protein kinase SYK	90.6811	101.626	0.263549	-1.18756	-31.5962	9.70595	0.659008
Q8CJG0	Q8CJG1;Q8CJF9;Q8CJG0	AGO2_MOUSE	Ago2	Protein argonaute-2	22.4723	20.8795	0.263901	1.18388	-1.4059	4.59143	0.659008
Q9JKN1	Q9JKN1	ZNT7_MOUSE	Slc30a7	Zinc transporter 7	16.2061	15.0909	0.263937	1.18639	-0.990458	3.22086	0.659008
Q99PG2	Q99PG2	OGFR_MOUSE	Ogfr	Opioid growth factor receptor	23.6505	25.4089	0.264164	-1.18643	-5.08273	1.5658	0.659008
Q8BFW7	Q8BFW7	LPP_MOUSE	Lpp	Lipoma-preferred partner homolog	12.5926	16.135	0.264208	-1.22976	-10.5673	3.48247	0.659008
Q8C0J6	Q8C0J6	SWAHC_MOUSE	Sowahc	Ankyrin repeat domain-containing protein SOWAHC	3.43087	4.92233	0.264477	-1.22361	-4.43337	1.45044	0.659234
Q8K2T1	Q8K2T1	NMRL1_MOUSE	Nmral1	NmrA-like family domain-containing protein 1	22.6324	20.253	0.264871	1.18142	-2.11047	6.86937	0.659646
P54728	P54726;P54728	RD23B_MOUSE	Rad23b	UV excision repair protein RAD23 homolog B	50.0165	42.695	0.264998	1.18548	-6.56426	21.2074	0.659646
Q9QXB9	Q9QXB9	DRG2_MOUSE	Drg2	Developmentally-regulated GTP-binding protein 2	13.9121	12.3948	0.265391	1.18569	-1.36682	4.40127	0.659761
O70310	O70310	NMT1_MOUSE	Nmt1	Glycylpeptide N-tetradecanoyltransferase 1	31.6224	35.4267	0.265401	-1.18968	-11.068	3.45932	0.659761
Q9CQN1	Q9CQN1	TRAP1_MOUSE	Trap1	Heat shock protein 75 kDa, mitochondrial	325.474	345.177	0.265748	-1.20593	-58.0754	18.6687	0.66018
Q61656	Q61656	DDX5_MOUSE	Ddx5	Probable ATP-dependent RNA helicase DDX5	93.3157	87.4123	0.266486	1.18072	-5.32014	17.1269	0.661304
Q61069	Q61069	USF1_MOUSE	Usf1	Upstream stimulatory factor 1	4.50151	7.03224	0.266557	-1.2468	-7.71443	2.65297	0.661304
O70493	O70493	SNX12_MOUSE	Snx12	Sorting nexin-12	79.1779	89.3693	0.26674	-1.17631	-29.4985	9.11561	0.661315
P43274	P43274	H14_MOUSE	H1-4	Histone H1.4	1071.47	955.012	0.267051	1.17837	-105.023	337.944	0.661644
Q9JLN9	Q9JLN9	MTOR_MOUSE	Mtor	Serine/threonine-protein kinase mTOR	12.8997	11.7957	0.26793	1.23832	-1.15323	3.36123	0.662109
Q62241	Q62241	RU1C_MOUSE	Snrpc	U1 small nuclear ribonucleoprotein C	13.473	15.6955	0.268309	-1.19133	-6.53908	2.09412	0.662109
Q8K1E0	Q8K1E0	STX5_MOUSE	Stx5	Syntaxin-5	6.62443	9.26248	0.268377	-1.23449	-8.02179	2.7457	0.662109
Q9D967	Q9D967	MGDP1_MOUSE	Mdp1	Magnesium-dependent phosphatase 1	22.5346	18.7045	0.268403	1.23855	-4.02427	11.6846	0.662109
Q91WR3	Q91WR3	ASCC2_MOUSE	Ascc2	Activating signal cointegrator 1 complex subunit 2	6.65921	9.40833	0.268546	-1.23717	-8.38232	2.88408	0.662109
Q8BMG7	Q8BMG7	RBGPR_MOUSE	Rab3gap2	Rab3 GTPase-activating protein non-catalytic subunit	13.4461	12.4983	0.268564	1.21096	-0.937037	2.83257	0.662109
Q80YQ8	Q80YQ8	RMD5A_MOUSE	Rmnd5a	E3 ubiquitin-protein ligase RMND5A	0.81578	1.73735	0.268647	-1.17145	-2.67509	0.831948	0.662109
P47738	P47738	ALDH2_MOUSE	Aldh2	Aldehyde dehydrogenase, mitochondrial	535.95	558.445	0.268669	-1.17527	-65.4845	20.4952	0.662109
Q8BP48	Q8BP48	MAP11_MOUSE	Metap1	Methionine aminopeptidase 1	19.4823	24.5825	0.269381	-1.20846	-15.2596	5.05914	0.663328
Q9QYI3	Q9QYI3	DNJC7_MOUSE	Dnajc7	DnaJ homolog subfamily C member 7	14.526	18.7142	0.269522	-1.21501	-12.6005	4.224	0.663328
P25206	P25206	MCM3_MOUSE	Mcm3	DNA replication licensing factor MCM3	31.3783	33.5458	0.269795	-1.18827	-6.39629	2.06113	0.663559
Q8CGK3	Q8CGK3	LONM_MOUSE	Lonp1	Lon protease homolog, mitochondrial	38.2545	42.7428	0.27008	-1.16812	-13.0598	4.08307	0.66382
Q9CWK3	Q9CWK3	CD2B2_MOUSE	Cd2bp2	CD2 antigen cytoplasmic tail-binding protein 2	19.663	25.9405	0.27046	-1.21668	-18.9767	6.4217	0.664312
P05208	P05208	CEL2A_MOUSE	Cela2a	Chymotrypsin-like elastase family member 2A	48.2338	3.5276	0.270884	1.23594	-48.0109	137.423	0.664913
Q8VDM4	Q8VDM4	PSMD2_MOUSE	Psmd2	26S proteasome non-ATPase regulatory subunit 2	39.8565	41.7201	0.272019	-1.16267	-5.43624	1.70897	0.666019
Q80X50	Q80X50	UBP2L_MOUSE	Ubap2l	Ubiquitin-associated protein 2-like	18.6896	15.9129	0.272157	1.18453	-2.68567	8.23901	0.666019
Q8BWQ6	Q8BWQ6	VP35L_MOUSE	Vps35l	VPS35 endosomal protein-sorting factor-like	14.8748	13.4087	0.272194	1.18454	-1.41864	4.35074	0.666019
Q8WUR0	Q8WUR0	CS012_MOUSE		Protein C19orf12 homolog	2.11435	4.50272	0.272202	-1.16235	-6.96951	2.19276	0.666019
O88895	O88895	HDAC3_MOUSE	Hdac3	Histone deacetylase 3	4.4229	6.20098	0.272234	-1.22499	-5.44698	1.89083	0.666019
Q9DAA6	Q9DAA6	EXOS1_MOUSE	Exosc1	Exosome complex component CSL4	3.33833	4.23515	0.272903	-1.21286	-2.728	0.934378	0.667217
Q9CQ80	Q9CQ80	VPS25_MOUSE	Vps25	Vacuolar protein-sorting-associated protein 25	21.577	19.6338	0.273358	1.1742	-1.85835	5.74479	0.667888
Q64475	Q64475	H2B1B_MOUSE	H2bc3	Histone H2B type 1-B	12.8901	23.2022	0.273581	-1.2069	-31.3005	10.6763	0.667993
P54726	P54726	RD23A_MOUSE	Rad23a	UV excision repair protein RAD23 homolog A	8.85132	14.6483	0.273927	-1.1627	-17.0208	5.42692	0.66834
P57776	P57776	EF1D_MOUSE	Eef1d	Elongation factor 1-delta	179.606	187.765	0.274252	-1.15683	-23.8771	7.55815	0.66834
Q8K2I4	Q8K2I4	MANBA_MOUSE	Manba	Beta-mannosidase	12.3174	10.0423	0.274265	1.16202	-2.13423	6.68452	0.66834
Q8K245	Q8K245	UVRAG_MOUSE	Uvrag	UV radiation resistance-associated protein	3.3497	5.29403	0.275411	-1.20252	-5.92198	2.03332	0.669883
Q9EQ20	Q9EQ20	MMSA_MOUSE	Aldh6a1	Methylmalonate-semialdehyde dehydrogenase [acylating], mitochondrial	23.436	20.6399	0.27546	1.20043	-2.91131	8.50344	0.669883
B1AZI6	B1AZI6	THOC2_MOUSE	Thoc2	THO complex subunit 2	5.85971	8.99882	0.275761	-1.15312	-9.20736	2.92913	0.669883
P54823	P54823	DDX6_MOUSE	Ddx6	Probable ATP-dependent RNA helicase DDX6	28.7376	25.2284	0.275789	1.15413	-3.28337	10.3017	0.669883
O35639	O35639	ANXA3_MOUSE	Anxa3	Annexin A3	102.639	112.422	0.275802	-1.17448	-29.1799	9.61436	0.669883
Q9R0Q4	Q9R0Q4	MO4L2_MOUSE	Morf4l2	Mortality factor 4-like protein 2	4.24912	6.08534	0.276241	-1.19237	-5.56463	1.89218	0.670247
P31725	P31725	S10A9_MOUSE	S100a9	Protein S100-A9	13.8329	18.3031	0.276566	-1.16577	-13.2786	4.33825	0.670247
P22315	P22315	HEMH_MOUSE	Fech	Ferrochelatase, mitochondrial	19.6415	21.3418	0.27659	-1.15854	-5.02254	1.62198	0.670247
Q920Q4	Q920Q4	VPS16_MOUSE	Vps16	Vacuolar protein sorting-associated protein 16 homolog	22.7995	21.6449	0.276676	1.16715	-1.12561	3.43485	0.670247
P02088	P02088	HBB1_MOUSE	Hbb-b1	Hemoglobin subunit beta-1	13.3349	0	0.277838	1.2172	-14.8269	41.4968	0.672622
P10639	P10639	THIO_MOUSE	Txn	Thioredoxin	215.153	160.712	0.278133	1.1995	-58.2576	167.139	0.672896
Q8BHG2	Q8BHG2	CZIB_MOUSE	Czib	CXXC motif containing zinc binding protein	14.0421	18.4006	0.279082	-1.18006	-13.2168	4.49975	0.674752
P42567	P42567	EPS15_MOUSE	Eps15	Epidermal growth factor receptor substrate 15	7.99305	10.0522	0.279631	-1.18163	-6.26508	2.14679	0.675574
Q8BIG7	Q8BIG7	CMTD1_MOUSE	Comtd1	Catechol O-methyltransferase domain-containing protein 1	30.1666	27.4338	0.279787	1.15679	-2.68727	8.15291	0.675574
Q8BWG8	Q8BWG8	ARRB1_MOUSE	Arrb1	Beta-arrestin-1	25.4486	22.1621	0.280261	1.18565	-3.48364	10.0566	0.676277
Q9QZ88	Q9QZ88	VPS29_MOUSE	Vps29	Vacuolar protein sorting-associated protein 29	94.5524	101.561	0.281133	-1.14307	-20.7788	6.76111	0.67794
Q8VDV3	Q8VDV3	R3GEF_MOUSE	Rab3il1	Guanine nucleotide exchange factor for Rab-3A	31.6365	28.8177	0.281678	1.1631	-2.87341	8.51101	0.678814
P32020	P32020	SCP2_MOUSE	Scp2	Sterol carrier protein 2	84.0065	88.6679	0.282022	-1.14142	-13.8444	4.52148	0.679171
Q9ES56	Q9ES56	TPPC4_MOUSE	Trappc4	Trafficking protein particle complex subunit 4	11.3921	14.2301	0.282202	-1.18722	-8.76093	3.085	0.679171
P17095	P17095	HMGA1_MOUSE	Hmga1	High mobility group protein HMG-I/HMG-Y	20.9065	14.5034	0.282377	1.16407	-6.59259	19.3988	0.679171
Q9CQH3	Q9CQH3	NDUB5_MOUSE	Ndufb5	NADH dehydrogenase [ubiquinone] 1 beta subcomplex subunit 5, mitochondrial	9.61197	13.3472	0.282954	-1.1936	-11.628	4.15761	0.680119
Q8VD75	Q8VD75	HIP1_MOUSE	Hip1	Huntingtin-interacting protein 1	23.2881	22.063	0.283657	1.14761	-1.22824	3.67854	0.681339
Q4FK66	Q4FK66	PR38A_MOUSE	Prpf38a	Pre-mRNA-splicing factor 38A	17.2753	14.7984	0.283937	1.16105	-2.5748	7.52854	0.681339
Q9WUA3	Q9WUA3	PFKAP_MOUSE	Pfkp	ATP-dependent 6-phosphofructokinase, platelet type	61.6789	66.2945	0.284193	-1.15189	-13.935	4.70385	0.681339
P14439	P01904;P04224;P14439	HA23_MOUSE	H2-Ea	H-2 class II histocompatibility antigen, E-U alpha chain	2.17821	4.43614	0.284268	-1.13155	-6.70495	2.1891	0.681339
Q9D6K5	Q9D6K5	SYJ2B_MOUSE	Synj2bp	Synaptojanin-2-binding protein	8.05265	10.3317	0.284491	-1.19042	-7.11879	2.56072	0.681339
Q8VHI3	Q8VHI3	OFUT2_MOUSE	Pofut2	GDP-fucose protein O-fucosyltransferase 2	7.37118	9.36871	0.284838	-1.17437	-6.16184	2.16678	0.681339
Q6KAR6	Q6KAR6	EXOC3_MOUSE	Exoc3	Exocyst complex component 3	11.9693	10.8298	0.285116	1.12961	-1.10935	3.38818	0.681339
Q6PHN9	Q6PHN9	RAB35_MOUSE	Rab35	Ras-related protein Rab-35	138.945	116.288	0.285215	1.17832	-24.9186	70.2333	0.681339
Q3V1L4	Q3V1L4	5NTC_MOUSE	Nt5c2	Cytosolic purine 5'-nucleotidase	8.78181	11.1205	0.28543	-1.16998	-7.20341	2.5261	0.681339
Q6PE15	Q6PE15	ABHDA_MOUSE	Abhd10	Palmitoyl-protein thioesterase ABHD10, mitochondrial	6.18788	8.04997	0.285665	-1.18816	-5.83228	2.10809	0.681339
Q07076	Q07076	ANXA7_MOUSE	Anxa7	Annexin A7	150.006	162.007	0.285676	-1.13752	-35.9924	11.9907	0.681339
P50431	P50431	GLYC_MOUSE	Shmt1	Serine hydroxymethyltransferase, cytosolic	5.3392	8.2517	0.285789	-1.13939	-8.75228	2.92727	0.681339
Q91VZ6	Q91VZ6	SMAP1_MOUSE	Smap1	Stromal membrane-associated protein 1	4.1777	6.87563	0.285853	-1.13097	-8.05257	2.65671	0.681339
Q8R146	Q8R146	APEH_MOUSE	Apeh	Acylamino-acid-releasing enzyme	27.7946	26.0925	0.286185	1.1275	-1.66735	5.07149	0.681559
Q80SY3	Q80SY3	VA0D2_MOUSE	Atp6v0d2	V-type proton ATPase subunit d 2	54.9263	49.7581	0.286313	1.15966	-5.49504	15.8316	0.681559
Q99LC2	Q99LC2	CSTF1_MOUSE	Cstf1	Cleavage stimulation factor subunit 1	16.188	15.5497	0.286672	1.12788	-0.629133	1.90567	0.681676
P22892	P22892	AP1G1_MOUSE	Ap1g1	AP-1 complex subunit gamma-1	25.5354	29.7671	0.286731	-1.17648	-13.1749	4.71142	0.681676
Q9CQ69	Q9CQ69	QCR8_MOUSE	Uqcrq	Cytochrome b-c1 complex subunit 8	71.8327	76.9038	0.286995	-1.13769	-15.2839	5.14167	0.681865
P17809	P17809	GTR1_MOUSE	Slc2a1	Solute carrier family 2, facilitated glucose transporter member 1	26.8372	22.3248	0.287557	1.12447	-4.45157	13.4763	0.682764
P48758	P48758	CBR1_MOUSE	Cbr1	Carbonyl reductase [NADPH] 1	54.4132	61.203	0.287932	-1.12237	-20.2688	6.68936	0.682945
Q7TT50	Q7TT50	MRCKB_MOUSE	Cdc42bpb	Serine/threonine-protein kinase MRCK beta	8.61138	10.7855	0.288134	-1.15626	-6.68637	2.33815	0.682945
P24527	P24527	LKHA4_MOUSE	Lta4h	Leukotriene A-4 hydrolase	48.4754	46.6295	0.288356	1.12357	-1.83253	5.52437	0.682945
O54782	O54782	MA2B2_MOUSE	Man2b2	Epididymis-specific alpha-mannosidase	59.832	54.4531	0.288371	1.14224	-5.59938	16.3573	0.682945
Q99LC3	Q99LC3	NDUAA_MOUSE	Ndufa10	NADH dehydrogenase [ubiquinone] 1 alpha subcomplex subunit 10, mitochondrial	26.3278	27.4308	0.289261	-1.12658	-3.32022	1.11422	0.683157
Q9D8V0	Q9D8V0	HM13_MOUSE	Hm13	Minor histocompatibility antigen H13	31.8886	34.2153	0.28927	-1.13374	-7.04731	2.39381	0.683157
Q8BH69	Q8BH69	SPS1_MOUSE	Sephs1	Selenide, water dikinase 1	13.1202	11.8849	0.289635	1.14403	-1.30959	3.78016	0.683157
Q78IS1	Q78IS1	TMED3_MOUSE	Tmed3	Transmembrane emp24 domain-containing protein 3	5.61794	3.05851	0.289657	1.12294	-2.57248	7.69135	0.683157
Q8BY71	Q8BY71	HAT1_MOUSE	Hat1	Histone acetyltransferase type B catalytic subunit	4.08472	5.80871	0.289661	-1.16225	-5.36176	1.91379	0.683157
P26516	P26516	PSMD7_MOUSE	Psmd7	26S proteasome non-ATPase regulatory subunit 7	44.6095	47.3808	0.289734	-1.13237	-8.39834	2.85561	0.683157
Q9WV80	Q9WV80	SNX1_MOUSE	Snx1	Sorting nexin-1	72.061	75.6734	0.289924	-1.13912	-11.0193	3.79437	0.683157
Q9JKX6	Q9JKX6	NUDT5_MOUSE	Nudt5	ADP-sugar pyrophosphatase	12.4973	13.5648	0.290058	-1.12102	-3.20727	1.07227	0.683157
Q99L04	Q99L04	DHRS1_MOUSE	Dhrs1	Dehydrogenase/reductase SDR family member 1	39.4364	42.6555	0.290125	-1.11998	-9.66547	3.22723	0.683157
Q99L27	Q99L27	GMPR2_MOUSE	Gmpr2	GMP reductase 2	15.0854	16.3312	0.290345	-1.14297	-3.81892	1.32739	0.683157
Q6IFX2	Q6IFX2	K1C42_MOUSE	Krt42	Keratin, type I cytoskeletal 42	118.679	18.8455	0.291001	1.17763	-116.863	316.53	0.683157
Q80X90	Q80X90	FLNB_MOUSE	Flnb	Filamin-B	20.1475	22.2798	0.291053	-1.12056	-6.42684	2.16228	0.683157
Q8R4R6	Q8R4R6	NUP35_MOUSE	Nup35	Nucleoporin NUP35	11.0394	6.83395	0.291147	1.16395	-4.76564	13.1765	0.683157
Q9D0F9	Q9D0F9	PGM1_MOUSE	Pgm1	Phosphoglucomutase-1	35.9378	33.4909	0.291213	1.11711	-2.4637	7.35767	0.683157
Q91YH6	Q91YH6	VATB1_MOUSE	Atp6v1b1	V-type proton ATPase subunit B, kidney isoform	38.8804	51.6737	0.291304	-1.17229	-40.4144	14.8279	0.683157
P51829	P51829	ADCY7_MOUSE	Adcy7	Adenylate cyclase type 7	15.598	11.0692	0.291504	1.12112	-4.62136	13.6789	0.683157
O89013	O89013	OBRG_MOUSE	Leprot	Leptin receptor gene-related protein	0.981683	0.39946	0.291596	1.12994	-0.608335	1.77278	0.683157
Q8VEE0	Q8VEE0	RPE_MOUSE	Rpe	Ribulose-phosphate 3-epimerase	36.7254	41.1457	0.292228	-1.14426	-13.664	4.82337	0.684206
Q9D7H3	Q9D7H3	RTCA_MOUSE	RtcA	RNA 3'-terminal phosphate cyclase	7.57095	10.6357	0.292461	-1.14485	-9.48728	3.35776	0.684296
O09005	O09005	DEGS1_MOUSE	Degs1	Sphingolipid delta(4)-desaturase DES1	29.2137	25.3557	0.292791	1.1309	-4.09349	11.8095	0.684296
O35216	O35216	CENPA_MOUSE	Cenpa	Histone H3-like centromeric protein A	5.72614	7.24626	0.292899	-1.15512	-4.75781	1.71758	0.684296
P62876	P62876	RPAB5_MOUSE	Polr2l	DNA-directed RNA polymerases I, II, and III subunit RPABC5	8.82341	12.2608	0.29318	-1.15904	-10.8094	3.93466	0.684296
Q9DBY1	Q9DBY1	SYVN1_MOUSE	Syvn1	E3 ubiquitin-protein ligase synoviolin	13.13	11.2643	0.293191	1.12841	-1.97552	5.70695	0.684296
Q6VNB8	Q6VNB8	WDFY3_MOUSE	Wdfy3	WD repeat and FYVE domain-containing protein 3	5.38545	3.35269	0.293682	1.10899	-2.05774	6.12327	0.685012
Q9D666	Q9D666	SUN1_MOUSE	Sun1	SUN domain-containing protein 1	4.75812	6.63647	0.294207	-1.14953	-5.87945	2.12276	0.685805
Q07813	Q07813	BAX_MOUSE	Bax	Apoptosis regulator BAX	93.0397	99.2934	0.295058	-1.13226	-19.3321	6.82463	0.687356
Q8BFZ9	Q8BFZ9;Q91X78	ERLN2_MOUSE	Erlin2	Erlin-2	21.0824	18.1978	0.295743	1.13327	-3.17983	8.9491	0.688518
Q8VCM8	Q8VCM8	NCLN_MOUSE	Ncln	Nicalin	47.53	44.2816	0.296239	1.14035	-3.66666	10.1636	0.689109
Q9CR35	Q9CR35	CTRB1_MOUSE	Ctrb1	Chymotrypsinogen B	150.97	9.18943	0.296369	1.16529	-170.799	454.36	0.689109
O35658	O35658	C1QBP_MOUSE	C1qbp	Complement component 1 Q subcomponent-binding protein, mitochondrial	23.8753	19.0079	0.29658	1.14067	-5.51895	15.2537	0.689167
Q9DB60	Q9DB60	PXL2B_MOUSE	Prxl2b	Prostamide/prostaglandin F synthase	27.9524	24.7566	0.297456	1.10376	-3.32267	9.7144	0.690255
Q8CIM3	Q8CIM3	D2HDH_MOUSE	D2hgdh	D-2-hydroxyglutarate dehydrogenase, mitochondrial	5.91415	9.19223	0.297484	-1.14621	-10.3641	3.80792	0.690255
Q9DCC4	Q9DCC4	P5CR3_MOUSE	Pycr3	Pyrroline-5-carboxylate reductase 3	20.1658	22.2518	0.297658	-1.09875	-6.31702	2.14495	0.690255
P61089	P61089	UBE2N_MOUSE	Ube2n	Ubiquitin-conjugating enzyme E2 N	94.7041	76.981	0.297794	1.10424	-18.5166	53.9627	0.690255
Q8R361	Q8R361	RFIP5_MOUSE	Rab11fip5	Rab11 family-interacting protein 5	38.7593	33.4048	0.298488	1.10689	-5.67557	16.3845	0.691431
P27601	P27601	GNA13_MOUSE	Gna13	Guanine nucleotide-binding protein subunit alpha-13	268.635	290.19	0.298855	-1.09629	-65.4146	22.3033	0.69161
Q91WT8	Q91WT8	RBM47_MOUSE	Rbm47	RNA-binding protein 47	14.5201	18.1173	0.298938	-1.14318	-11.4073	4.21298	0.69161
Q7TSI3	Q7TSI3	PP6R1_MOUSE	Ppp6r1	Serine/threonine-protein phosphatase 6 regulatory subunit 1	8.85627	11.133	0.299338	-1.12408	-7.10178	2.54827	0.692103
Q6P5D8	Q6P5D8	SMHD1_MOUSE	Smchd1	Structural maintenance of chromosomes flexible hinge domain-containing protein 1	12.6806	11.2768	0.300295	1.09629	-1.47503	4.28262	0.693035
Q8R3Q0	Q8R3Q0	SARAF_MOUSE	Saraf	Store-operated calcium entry-associated regulatory factor	6.18448	7.8002	0.300716	-1.10249	-4.96525	1.73381	0.693035
P63323	P63323	RS12_MOUSE	Rps12	40S ribosomal protein S12	83.5667	91.2621	0.300786	-1.1039	-23.686	8.2952	0.693035
Q9DCJ5	Q9DCJ5	NDUA8_MOUSE	Ndufa8	NADH dehydrogenase [ubiquinone] 1 alpha subcomplex subunit 8	4.85173	9.59447	0.301016	-1.09063	-14.432	4.94656	0.693035
Q8BKC5	Q8BKC5	IPO5_MOUSE	Ipo5	Importin-5	76.6863	84.3639	0.301198	-1.1147	-23.9097	8.5545	0.693035
Q8K1X1	Q8K1X1	WDR11_MOUSE	Wdr11	WD repeat-containing protein 11	7.85229	10.796	0.30127	-1.14321	-9.42515	3.53771	0.693035
P60670	P60670	NPL4_MOUSE	Nploc4	Nuclear protein localization protein 4 homolog	11.8289	14.8131	0.301449	-1.13909	-9.52343	3.55506	0.693035
Q9D287	Q9D287	SPF27_MOUSE	Bcas2	Pre-mRNA-splicing factor SPF27	13.0453	14.0195	0.301453	-1.09075	-2.96938	1.02108	0.693035
Q3U0J8	Q3U0J8	TBD2B_MOUSE	Tbc1d2b	TBC1 domain family member 2B	8.42366	5.34512	0.301505	1.09249	-3.24373	9.4008	0.693035
Q61781	Q6IFX2;Q61781;Q9QWL7;P19001;Q61414	K1C14_MOUSE	Krt14	Keratin, type I cytoskeletal 14	165.883	34.4841	0.301899	1.14882	-161.351	424.148	0.693035
Q91WU5	Q91WU5	AS3MT_MOUSE	As3mt	Arsenite methyltransferase	9.03798	12.7253	0.301959	-1.14029	-11.806	4.43134	0.693035
Q8BJ48	Q8BJ48	NAGPA_MOUSE	Nagpa	N-acetylglucosamine-1-phosphodiester alpha-N-acetylglucosaminidase	10.5774	13.0969	0.302153	-1.12774	-7.97506	2.93609	0.693035
P97355	P97355	SPSY_MOUSE	Sms	Spermine synthase	16.0081	20.2068	0.302332	-1.12778	-13.3004	4.90301	0.693035
P68369	P68369;P05214	TBA1A_MOUSE	Tuba1a	Tubulin alpha-1A chain	16.433	14.5372	0.302555	1.09577	-2.03801	5.82964	0.693035
Q9DCH4	Q9DCH4	EIF3F_MOUSE	Eif3f	Eukaryotic translation initiation factor 3 subunit F	42.9203	45.2659	0.302699	-1.10422	-7.27424	2.5832	0.693035
Q01149	Q01149	CO1A2_MOUSE	Col1a2	Collagen alpha-2(I) chain	5.12219	2.5582	0.302735	1.11295	-2.89151	8.0195	0.693035
Q5U458	Q5U458	DJC11_MOUSE	Dnajc11	DnaJ homolog subfamily C member 11	7.43245	10.1995	0.302927	-1.13342	-8.83515	3.30104	0.693046
Q8K310	Q8K310	MATR3_MOUSE	Matr3	Matrin-3	32.8958	31.3818	0.303941	1.11143	-1.72292	4.75096	0.694818
Q8VE97	Q8VE97	SRSF4_MOUSE	Srsf4	Serine/arginine-rich splicing factor 4	7.75403	6.25638	0.304077	1.10183	-1.66347	4.65877	0.694818
Q8R4N0	Q8R4N0	CLYBL_MOUSE	Clybl	Citramalyl-CoA lyase, mitochondrial	9.90281	7.55789	0.304371	1.08462	-2.49417	7.18401	0.695062
Q61102	Q61102	ABCB7_MOUSE	Abcb7	Iron-sulfur clusters transporter ABCB7, mitochondrial	4.80953	2.91075	0.305104	1.08466	-2.03568	5.83323	0.695807
P60824	P60824	CIRBP_MOUSE	Cirbp	Cold-inducible RNA-binding protein	2.0002	0.802115	0.305478	1.09821	-1.3379	3.73406	0.695807
Q8BXA5	Q8BXA5	CLP1L_MOUSE	Clptm1l	Cleft lip and palate transmembrane protein 1-like protein	3.04623	4.68285	0.305588	-1.12667	-5.24816	1.97494	0.695807
Q9Z0H4	Q9Z0H4	CELF2_MOUSE	Celf2	CUGBP Elav-like family member 2	34.7089	37.4981	0.30582	-1.11389	-8.83944	3.26107	0.695807
Q9CRD2	Q9CRD2	EMC2_MOUSE	Emc2	ER membrane protein complex subunit 2	19.3122	17.7578	0.306074	1.08654	-1.69256	4.80143	0.695807
Q8C7R4	Q8C7R4	UBA6_MOUSE	Uba6	Ubiquitin-like modifier-activating enzyme 6	26.5074	25.1867	0.306076	1.11222	-1.54148	4.18278	0.695807
Q8BYI6	Q8BYI6	PCAT2_MOUSE	Lpcat2	Lysophosphatidylcholine acyltransferase 2	19.3769	16.7684	0.306099	1.10047	-2.95051	8.16748	0.695807
Q6P549	Q6P549	SHIP2_MOUSE	Inppl1	Phosphatidylinositol 3,4,5-trisphosphate 5-phosphatase 2	37.784	39.314	0.3062	-1.10358	-4.80707	1.74711	0.695807
P84099	P84099	RL19_MOUSE	Rpl19	60S ribosomal protein L19	112.132	98.203	0.306561	1.09666	-15.6719	43.5302	0.695887
Q91VR2	Q91VR2	ATPG_MOUSE	Atp5f1c	ATP synthase subunit gamma, mitochondrial	54.0915	48.3761	0.306611	1.07966	-6.14261	17.5733	0.695887
Q8BGC0	Q8BGC0	HTSF1_MOUSE	Htatsf1	HIV Tat-specific factor 1 homolog	9.2187	12.6398	0.307172	-1.1282	-11.0603	4.21821	0.696469
Q8VCI0	Q8VCI0	PLBL1_MOUSE	Plbd1	Phospholipase B-like 1	55.4437	52.1621	0.307244	1.07711	-3.52618	10.0894	0.696469
E9Q634	E9Q634	MYO1E_MOUSE	Myo1e	Unconventional myosin-Ie	67.1244	72.32	0.307608	-1.09502	-16.2771	5.88587	0.696868
Q3URS9	Q3URS9	MITOK_MOUSE	Ccdc51	Mitochondrial potassium channel	4.0735	5.5807	0.308935	-1.11795	-4.85785	1.84344	0.698272
P46737	P46737	BRCC3_MOUSE	Brcc3	Lys-63-specific deubiquitinase BRCC36	3.92302	5.54246	0.308951	-1.12935	-5.28163	2.04275	0.698272
Q8K0Q5	Q8K0Q5	RHG18_MOUSE	Arhgap18	Rho GTPase-activating protein 18	14.5213	12.9642	0.309033	1.08542	-1.74491	4.85915	0.698272
Q8R0Y6	Q8R0Y6	AL1L1_MOUSE	Aldh1l1	Cytosolic 10-formyltetrahydrofolate dehydrogenase	26.0571	28.5214	0.309095	-1.10042	-7.80791	2.87921	0.698272
Q9CQA9	Q9CQA9	NTPCR_MOUSE	Ntpcr	Cancer-related nucleoside-triphosphatase homolog	12.3685	11.4523	0.30917	1.073	-0.993621	2.82607	0.698272
Q9CY45	Q9CY45	EFMT1_MOUSE	Eef1akmt1	EEF1A lysine methyltransferase 1	5.98022	9.70632	0.309407	-1.07285	-11.5017	4.04949	0.698382
Q60865	Q60865	CAPR1_MOUSE	Caprin1	Caprin-1	57.7305	61.966	0.309706	-1.1046	-13.5097	5.03871	0.698631
O35295	O35295	PURB_MOUSE	Purb	Transcriptional activator protein Pur-beta	29.609	34.7152	0.310572	-1.07264	-15.8279	5.61556	0.699981
Q61598	Q61598	GDIB_MOUSE	Gdi2	Rab GDP dissociation inhibitor beta	344.368	362.527	0.310683	-1.08497	-57.0081	20.6891	0.699981
Q3TRM8	Q3TRM8	HXK3_MOUSE	Hk3	Hexokinase-3	526.258	584.89	0.310979	-1.07447	-182.357	65.0931	0.700224
Q9Z0X1	Q9Z0X1	AIFM1_MOUSE	Aifm1	Apoptosis-inducing factor 1, mitochondrial	32.8884	31.1547	0.311626	1.10607	-2.1147	5.58197	0.700856
P62259	P62259	1433E_MOUSE	Ywhae	14-3-3 protein epsilon	147.276	130.784	0.311654	1.09255	-19.3895	52.3735	0.700856
P17225	P17225	PTBP1_MOUSE	Ptbp1	Polypyrimidine tract-binding protein 1	33.5918	37.9226	0.312097	-1.06505	-13.4013	4.73973	0.700856
Q8C0L0	Q8C0L0	TMX4_MOUSE	Tmx4	Thioredoxin-related transmembrane protein 4	8.8238	6.63529	0.312204	1.08118	-2.50821	6.88522	0.700856
Q9DCT1	Q9DCT1	AKCL2_MOUSE	Akr1e2	1,5-anhydro-D-fructose reductase	279.121	332.319	0.312206	-1.09853	-170.362	63.9663	0.700856
Q62419	Q62420;Q62419	SH3G1_MOUSE	Sh3gl1	Endophilin-A2	45.634	48.9271	0.312574	-1.07139	-10.2736	3.68732	0.701255
P47963	P47963	RL13_MOUSE	Rpl13	60S ribosomal protein L13	370.782	337.349	0.313336	1.07378	-37.9954	104.861	0.701875
Q9CXF4	Q9CXF4	TBC15_MOUSE	Tbc1d15	TBC1 domain family member 15	20.6071	22.3011	0.313364	-1.08769	-5.38984	2.00187	0.701875
Q99J39	Q99J39	DCMC_MOUSE	Mlycd	Malonyl-CoA decarboxylase, mitochondrial	4.6189	6.85805	0.313418	-1.06202	-6.9426	2.46431	0.701875
Q9D6J5	Q9D6J5	NDUB8_MOUSE	Ndufb8	NADH dehydrogenase [ubiquinone] 1 beta subcomplex subunit 8, mitochondrial	27.6517	24.7001	0.31387	1.0907	-3.5367	9.43994	0.702461
Q8VD04	Q8VD04	GRAP1_MOUSE	Gripap1	GRIP1-associated protein 1	14.997	14.2976	0.314576	1.0649	-0.785653	2.18445	0.702791
P97352	P97352	S10AD_MOUSE	S100a13	Protein S100-A13	26.5728	20.3896	0.314647	1.06458	-6.94478	19.3112	0.702791
P97390	P97390	VPS45_MOUSE	Vps45	Vacuolar protein sorting-associated protein 45	13.7492	17.1866	0.314666	-1.11063	-11.2652	4.39035	0.702791
Q9Z0F8	Q9Z0F8	ADA17_MOUSE	Adam17	Disintegrin and metalloproteinase domain-containing protein 17	4.99327	6.8423	0.314906	-1.10125	-6.00539	2.30733	0.702791
Q8VCW8	Q8VCW8	ACSF2_MOUSE	Acsf2	Medium-chain acyl-CoA ligase ACSF2, mitochondrial	13.75	11.3473	0.314966	1.09127	-2.91825	7.72361	0.702791
Q9CW46	Q9CW46	RAVR1_MOUSE	Raver1	Ribonucleoprotein PTB-binding 1	15.4012	20.9397	0.316098	-1.10707	-18.1935	7.11658	0.704697
Q80VJ3	Q80VJ3	DNPH1_MOUSE	Dnph1	2'-deoxynucleoside 5'-phosphate N-hydrolase 1	6.83533	8.73639	0.316275	-1.06695	-5.98958	2.18746	0.704697
P43277	P43277	H13_MOUSE	H1-3	Histone H1.3	12.5401	9.04006	0.316391	1.09205	-4.32719	11.3272	0.704697
Q9DBR7	Q9DBR7	MYPT1_MOUSE	Ppp1r12a	Protein phosphatase 1 regulatory subunit 12A	26.0666	22.4406	0.316677	1.0937	-4.51794	11.7701	0.704878
P82343	P82343	RENBP_MOUSE	Renbp	N-acylglucosamine 2-epimerase	52.0754	47.5171	0.316852	1.07387	-5.38206	14.4988	0.704878
Q91VK1	Q91VK1	5MP1_MOUSE	Bzw2	eIF5-mimic protein 1	7.33669	9.38702	0.317626	-1.09335	-6.67953	2.57888	0.706174
Q9D404	Q9D404	OXSM_MOUSE	Oxsm	3-oxoacyl-[acyl-carrier-protein] synthase, mitochondrial	7.09817	9.61804	0.318243	-1.10128	-8.30247	3.26272	0.707121
Q91YE6	Q91YE6	IPO9_MOUSE	Ipo9	Importin-9	4.10495	6.34388	0.318513	-1.04985	-6.99114	2.51327	0.707298
P10630	P10630	IF4A2_MOUSE	Eif4a2	Eukaryotic initiation factor 4A-II	7.58058	5.14439	0.318836	1.05932	-2.81965	7.69203	0.707591
P29387	P29387	GBB4_MOUSE	Gnb4	Guanine nucleotide-binding protein subunit beta-4	16.7134	19.0031	0.319576	-1.05008	-7.18059	2.60129	0.70872
Q9Z0W3	Q9Z0W3	NU160_MOUSE	Nup160	Nuclear pore complex protein Nup160	3.51565	4.5309	0.319749	-1.06276	-3.22889	1.19839	0.70872
P70404	P70404	IDHG1_MOUSE	Idh3g	Isocitrate dehydrogenase [NAD] subunit gamma 1, mitochondrial	43.7899	48.1239	0.319919	-1.04673	-13.5627	4.89454	0.70872
Q9CZU6	Q9CZU6	CISY_MOUSE	Cs	Citrate synthase, mitochondrial	199.19	213.771	0.32019	-1.04644	-45.6606	16.4996	0.708895
Q9D5V6	Q9D5V6	SYAP1_MOUSE	Syap1	Synapse-associated protein 1	14.7334	18.2035	0.320627	-1.08108	-11.2975	4.35727	0.709355
Q9QX47	Q9QX47	SON_MOUSE	Son	Protein SON	59.464	51.0301	0.32078	1.04603	-9.59316	26.461	0.709355
Q5SXY1	Q5SXY1	CYTSB_MOUSE	Specc1	Cytospin-B	10.1301	12.4191	0.322157	-1.08479	-7.5322	2.9541	0.711976
Q9ER88	Q9ER88	RT29_MOUSE	Dap3	28S ribosomal protein S29, mitochondrial	5.17521	7.05794	0.322682	-1.08483	-6.20954	2.44407	0.712174
Q9WUB0	Q9WUB0	HOIL1_MOUSE	Rbck1	RanBP-type and C3HC4-type zinc finger-containing protein 1	6.32192	8.60286	0.32273	-1.08638	-7.53765	2.97577	0.712174
P24063	P24063	ITAL_MOUSE	Itgal	Integrin alpha-L	11.109	14.4833	0.322824	-1.04132	-10.6182	3.86954	0.712174
Q923T9	P28652;Q923T9	KCC2G_MOUSE	Camk2g	Calcium/calmodulin-dependent protein kinase type II subunit gamma	9.06339	12.1656	0.323418	-1.05306	-9.90901	3.70462	0.713059
P51660	P51660	DHB4_MOUSE	Hsd17b4	Peroxisomal multifunctional enzyme type 2	71.7423	68.6958	0.325014	1.05783	-3.75317	9.8461	0.716153
Q63961	Q63961	EGLN_MOUSE	Eng	Endoglin	9.04153	14.6702	0.325234	-1.0353	-17.7647	6.50726	0.71621
P30416	P30416	FKBP4_MOUSE	Fkbp4	Peptidyl-prolyl cis-trans isomerase FKBP4	22.2989	23.6024	0.326102	-1.04583	-4.17607	1.56894	0.717676
P24547	P24547	IMDH2_MOUSE	Impdh2	Inosine-5'-monophosphate dehydrogenase 2	60.5565	65.157	0.326442	-1.03698	-14.6153	5.41435	0.717676
P99024	Q7TMM9;Q9CWF2;P99024;Q9ERD7	TBB5_MOUSE	Tubb5	Tubulin beta-5 chain	772.722	873.879	0.326481	-1.08083	-337.701	135.387	0.717676
Q7TSQ8	Q7TSQ8	PDPR_MOUSE	Pdpr	Pyruvate dehydrogenase phosphatase regulatory subunit, mitochondrial	7.35147	9.93934	0.327738	-1.07147	-8.59369	3.41794	0.719058
P61924	P61924	COPZ1_MOUSE	Copz1	Coatomer subunit zeta-1	20.4134	15.8414	0.327785	1.05425	-5.74458	14.8886	0.719058
P15626	P15626;Q8R5I6	GSTM2_MOUSE	Gstm2	Glutathione S-transferase Mu 2	1.9507	0.532707	0.327926	1.05394	-1.78278	4.61877	0.719058
Q9D6R2	Q9D6R2	IDH3A_MOUSE	Idh3a	Isocitrate dehydrogenase [NAD] subunit alpha, mitochondrial	75.2583	78.645	0.328078	-1.029	-10.7349	3.96151	0.719058
Q9DC29	Q9DC29;P06795;P21447;P21440	ABCB6_MOUSE	Abcb6	ATP-binding cassette sub-family B member 6	678.77	776.877	0.32808	-1.03931	-314.541	118.328	0.719058
Q9CR89	Q9CR89	ERGI2_MOUSE	Ergic2	Endoplasmic reticulum-Golgi intermediate compartment protein 2	5.0923	2.6737	0.329079	1.02604	-2.83442	7.67162	0.720237
P11247	P11247	PERM_MOUSE	Mpo	Myeloperoxidase	81.3779	120.862	0.329165	-1.03178	-126.083	47.115	0.720237
Q99J93	Q99J93	IFM2_MOUSE	Ifitm2	Interferon-induced transmembrane protein 2	10.1104	6.42439	0.329208	1.02789	-4.3496	11.7216	0.720237
Q3TDQ1	Q3TDQ1	STT3B_MOUSE	Stt3b	Dolichyl-diphosphooligosaccharide--protein glycosyltransferase subunit STT3B	9.16551	7.30745	0.329535	1.04248	-2.29802	6.01415	0.720237
Q9QZ15	Q9QZ15	CLC4A_MOUSE	Clec4a	C-type lectin domain family 4 member A	11.7229	9.51489	0.32959	1.05289	-2.81811	7.23408	0.720237
Q99KR7	Q99KR7	PPIF_MOUSE	Ppif	Peptidyl-prolyl cis-trans isomerase F, mitochondrial	5.8437	8.66051	0.329918	-1.04164	-9.12316	3.48954	0.720528
Q3TFD2	Q3TFD2	PCAT1_MOUSE	Lpcat1	Lysophosphatidylcholine acyltransferase 1	2.75063	3.83666	0.330861	-1.04216	-3.53341	1.36135	0.721973
Q9ES57	Q9ES57	MO2R1_MOUSE	Cd200r1	Cell surface glycoprotein CD200 receptor 1	13.1281	9.27026	0.33112	1.04552	-4.89839	12.6141	0.721973
O35129	O35129	PHB2_MOUSE	Phb2	Prohibitin-2	259.288	271.813	0.331164	-1.06535	-41.9225	16.8741	0.721973
A2AWP8	A2AWP8	ARGAL_MOUSE	Arhgef10l	Rho guanine nucleotide exchange factor 10-like protein	6.79255	9.14068	0.331778	-1.06614	-7.88897	3.19272	0.72211
Q9JLQ0	Q9JLQ0	CD2AP_MOUSE	Cd2ap	CD2-associated protein	16.0065	17.4884	0.332004	-1.02648	-4.75802	1.79429	0.72211
Q8BHT6	Q8BHT6	B3GLT_MOUSE	B3glct	Beta-1,3-glucosyltransferase	3.54203	5.59597	0.332052	-1.02341	-6.5732	2.46532	0.72211
O35218	O35218	CPSF2_MOUSE	Cpsf2	Cleavage and polyadenylation specificity factor subunit 2	6.75908	9.12016	0.332204	-1.07008	-7.98556	3.26341	0.72211
Q8C129	Q8C129	LCAP_MOUSE	Lnpep	Leucyl-cystinyl aminopeptidase	30.4338	31.9018	0.332431	-1.04579	-4.82847	1.8924	0.72211
Q9Z1F9	Q9Z1F9	SAE2_MOUSE	Uba2	SUMO-activating enzyme subunit 2	29.1469	31.4832	0.332643	-1.02249	-7.48697	2.81431	0.72211
P27546	P27546	MAP4_MOUSE	Map4	Microtubule-associated protein 4	46.7307	53.99	0.332908	-1.01946	-23.2076	8.68912	0.72211
P97287	P97287	MCL1_MOUSE	Mcl1	Induced myeloid leukemia cell differentiation protein Mcl-1 homolog	22.1781	25.3967	0.333084	-1.05404	-10.72	4.28302	0.72211
P49586	P49586	PCY1A_MOUSE	Pcyt1a	Choline-phosphate cytidylyltransferase A	49.3077	46.155	0.33363	1.02031	-3.81292	10.1184	0.72211
Q61545	Q61545	EWS_MOUSE	Ewsr1	RNA-binding protein EWS	15.6729	12.6205	0.333946	1.0585	-4.1558	10.2605	0.72211
P58242	P58242	ASM3B_MOUSE	Smpdl3b	Acid sphingomyelinase-like phosphodiesterase 3b	7.61696	11.061	0.334082	-1.01508	-11.0077	4.11953	0.72211
P68254	P68254	1433T_MOUSE	Ywhaq	14-3-3 protein theta	54.5308	57.2608	0.334158	-1.01596	-8.73674	3.27677	0.72211
P58252	P58252	EF2_MOUSE	Eef2	Elongation factor 2	607.149	653.966	0.334295	-1.03542	-153.334	59.699	0.72211
Q8BRN9	Q8BRN9	C2D1B_MOUSE	Cc2d1b	Coiled-coil and C2 domain-containing protein 1B	17.1315	18.0866	0.334335	-1.01434	-3.05307	1.1429	0.72211
Q8R1U1	Q8R1U1	COG4_MOUSE	Cog4	Conserved oligomeric Golgi complex subunit 4	6.52473	7.9621	0.334431	-1.05594	-4.82725	1.95251	0.72211
Q8BJ05	Q8BJ05	ZC3HE_MOUSE	Zc3h14	Zinc finger CCCH domain-containing protein 14	3.97716	5.53317	0.33457	-1.03282	-5.08646	1.97444	0.72211
Q8VBV7	Q8VBV7	CSN8_MOUSE	Cops8	COP9 signalosome complex subunit 8	43.3996	46.3098	0.334606	-1.01637	-9.33479	3.51432	0.72211
Q8BJW6	Q8BJW6	EIF2A_MOUSE	Eif2a	Eukaryotic translation initiation factor 2A	21.3166	20.0363	0.334736	1.02012	-1.56598	4.12654	0.72211
Q9CQC2	Q9CQC2	COL_MOUSE	Clps	Colipase	59.7696	0	0.335064	1.06626	-84.3259	203.865	0.722151
Q8JZN5	Q8JZN5	ACAD9_MOUSE	Acad9	Complex I assembly factor ACAD9, mitochondrial	22.5175	20.4968	0.33517	1.03447	-2.59387	6.63527	0.722151
Q9D773	Q9D773	RM02_MOUSE	Mrpl2	39S ribosomal protein L2, mitochondrial	7.08064	9.54513	0.335364	-1.04977	-8.24927	3.32029	0.722151
Q60692	Q60692	PSB6_MOUSE	Psmb6	Proteasome subunit beta type-6	105.025	112.204	0.335535	-1.01181	-22.9925	8.63463	0.722151
Q9R1C7	Q9R1C7	PR40A_MOUSE	Prpf40a	Pre-mRNA-processing factor 40 homolog A	19.3408	17.3445	0.335736	1.01695	-2.44434	6.43681	0.722164
P54775	P54775	PRS6B_MOUSE	Psmc4	26S proteasome regulatory subunit 6B	88.806	94.3028	0.336247	-1.01158	-17.6509	6.65727	0.722611
Q9D358	Q9D358	PPAC_MOUSE	Acp1	Low molecular weight phosphotyrosine protein phosphatase	62.7936	67.6475	0.336494	-1.00964	-15.5668	5.85912	0.722611
Q5XJY5	Q5XJY5	COPD_MOUSE	Arcn1	Coatomer subunit delta	51.3364	55.8875	0.336529	-1.04755	-15.2715	6.16935	0.722611
P06800	P06800	PTPRC_MOUSE	Ptprc	Receptor-type tyrosine-protein phosphatase C	121.202	126.878	0.336802	-1.03541	-18.7886	7.43755	0.722778
P07310	P07310	KCRM_MOUSE	Ckm	Creatine kinase M-type	442.486	473.19	0.337547	-1.03461	-101.875	40.4673	0.723542
Q8BVA5	Q8BVA5	LDAH_MOUSE	Ldah	Lipid droplet-associated hydrolase	5.79005	3.86944	0.337616	1.01146	-2.35968	6.20091	0.723542
P25976	P25976	UBF1_MOUSE	Ubtf	Nucleolar transcription factor 1	20.1171	13.8651	0.337791	1.05826	-8.87772	21.3818	0.723542
Q9D6W8	Q9D6W8	BORC6_MOUSE	Borcs6	BLOC-1-related complex subunit 6	7.28714	9.80147	0.337975	-1.05575	-8.57929	3.55064	0.723542
Q99KC8	Q99KC8	VMA5A_MOUSE	Vwa5a	von Willebrand factor A domain-containing protein 5A	300.386	329.68	0.338219	-1.00591	-94.1988	35.6098	0.723542
P70302	P70302	STIM1_MOUSE	Stim1	Stromal interaction molecule 1	15.4919	11.8254	0.33833	1.04903	-5.09339	12.4265	0.723542
O70404	O70404	VAMP8_MOUSE	Vamp8	Vesicle-associated membrane protein 8	88.1886	78.1884	0.339175	1.00958	-12.4218	32.4222	0.724931
P11352	P11352	GPX1_MOUSE	Gpx1	Glutathione peroxidase 1	17.4965	15.7134	0.339895	1.01932	-2.30049	5.86676	0.725179
Q9D0R8	Q9D0R8	LSM12_MOUSE	Lsm12	Protein LSM12 homolog	16.2236	17.8491	0.339929	-1.02318	-5.37421	2.12314	0.725179
O89053	O89053	COR1A_MOUSE	Coro1a	Coronin-1A	371.769	414.218	0.339975	-1.03507	-142.442	57.5424	0.725179
Q99KY4	Q99KY4	GAK_MOUSE	Gak	Cyclin-G-associated kinase	20.0716	22.0282	0.340075	-1.01347	-6.39693	2.4838	0.725179
Q99N84	Q99N84	RT18B_MOUSE	Mrps18b	28S ribosomal protein S18b, mitochondrial	2.50595	3.99359	0.340385	-1.00481	-4.81979	1.84451	0.725353
P00493	P00493	HPRT_MOUSE	Hprt1	Hypoxanthine-guanine phosphoribosyltransferase	120.862	128.994	0.340713	-1.01679	-26.7669	10.5026	0.725353
P41242	P41242	MATK_MOUSE	Matk	Megakaryocyte-associated tyrosine-protein kinase	7.26513	10.8644	0.340744	-1.03228	-12.0769	4.87832	0.725353
Q9DB50	Q9DB50	AP1S2_MOUSE	Ap1s2	AP-1 complex subunit sigma-2	19.7503	24.2478	0.341796	-1.03358	-15.1869	6.19183	0.726802
Q3TYX3	Q3TYX3	SMYD5_MOUSE	Smyd5	Histone-lysine N-trimethyltransferase SMYD5	8.96422	12.0579	0.341817	-1.03317	-10.442	4.25466	0.726802
P19973	P19973	LSP1_MOUSE	Lsp1	Lymphocyte-specific protein 1	54.9716	61.609	0.342155	-0.999956	-21.5363	8.26155	0.727104
Q9JJ00	Q9JJ00	PLS1_MOUSE	Plscr1	Phospholipid scramblase 1	7.5645	9.37006	0.342364	-1.00894	-5.92779	2.31669	0.72713
P39688	P39688	FYN_MOUSE	Fyn	Tyrosine-protein kinase Fyn	6.03425	9.14041	0.342791	-1.03757	-10.5898	4.37754	0.72757
P54751	P54751	SIA4A_MOUSE	St3gal1	CMP-N-acetylneuraminate-beta-galactosamide-alpha-2,3-sialyltransferase 1	2.6621	6.08644	0.343159	-1.00787	-11.2656	4.41691	0.72757
Q9CRB9	Q9CRB9	MIC19_MOUSE	Chchd3	MICOS complex subunit Mic19	22.3017	20.4889	0.343312	0.995736	-2.25447	5.88001	0.72757
P16546	P16546	SPTN1_MOUSE	Sptan1	Spectrin alpha chain, non-erythrocytic 1	15.9909	14.6299	0.343357	0.997403	-1.70225	4.42408	0.72757
Q14CH1	Q14CH1	MOCOS_MOUSE	Mocos	Molybdenum cofactor sulfurase	32.1736	28.6351	0.344514	1.03203	-4.99643	12.0734	0.72948
Q9Z2A0	Q9Z2A0	PDPK1_MOUSE	Pdpk1	3-phosphoinositide-dependent protein kinase 1	4.40771	5.51605	0.344655	-1.0179	-3.71626	1.4996	0.72948
Q99PU8	Q99PU8	DHX30_MOUSE	Dhx30	ATP-dependent RNA helicase DHX30	3.68615	5.36869	0.344849	-0.991568	-5.46459	2.0995	0.72948
Q61686	Q61686	CBX5_MOUSE	Cbx5	Chromobox protein homolog 5	4.2785	5.40062	0.34507	-0.993699	-3.65728	1.41303	0.729531
Q91YJ3	Q91YJ3	THYN1_MOUSE	Thyn1	Thymocyte nuclear protein 1	1.98585	3.4677	0.346431	-0.992188	-4.84821	1.8845	0.731991
Q3TCH7	A2A432;Q3TCH7	CUL4A_MOUSE	Cul4a	Cullin-4A	7.74722	10.6765	0.347477	-1.00946	-9.83918	3.98064	0.733783
Q8BRT1	Q8BRT1	CLAP2_MOUSE	Clasp2	CLIP-associating protein 2	9.16168	11.1383	0.347908	-1.0301	-6.83428	2.88111	0.733995
Q99L47	Q99L47	F10A1_MOUSE	St13	Hsc70-interacting protein	91.8597	98.2921	0.347974	-0.995647	-21.275	8.41015	0.733995
Q9DBS5	Q9DBS5	KLC4_MOUSE	Klc4	Kinesin light chain 4	7.66789	9.36655	0.348219	-1.02399	-5.83442	2.43711	0.734094
Q3TIX9	Q3TIX9	SNUT2_MOUSE	Usp39	U4/U6.U5 tri-snRNP-associated protein 2	20	18.6997	0.348425	1.0044	-1.75685	4.35738	0.73411
O35657	O35657	NEUR1_MOUSE	Neu1	Sialidase-1	18.0319	15.9153	0.348973	1.01685	-2.99358	7.22671	0.734676
Q8C570	Q8C570	RAE1L_MOUSE	Rae1	mRNA export factor	12.3792	11.4068	0.34909	0.989025	-1.25984	3.20466	0.734676
O09106	O09106	HDAC1_MOUSE	Hdac1	Histone deacetylase 1	34.5662	32.5891	0.349636	0.993638	-2.61528	6.56962	0.735179
P51807	P51807	DYLT1_MOUSE	Dynlt1	Dynein light chain Tctex-type 1	14.8606	11.8329	0.350203	1.0026	-4.14766	10.2032	0.735179
P62192	P62192	PRS4_MOUSE	Psmc1	26S proteasome regulatory subunit 4	81.4584	84.6275	0.350809	-1.00447	-10.7348	4.39656	0.735179
Q78ZA7	Q78ZA7	NP1L4_MOUSE	Nap1l4	Nucleosome assembly protein 1-like 4	28.7382	24.8248	0.35099	1.00659	-5.47737	13.3043	0.735179
Q3UKJ7	Q3UKJ7	SMU1_MOUSE	Smu1	WD40 repeat-containing protein SMU1	13.0567	11.8999	0.351268	0.987947	-1.5293	3.84305	0.735179
O54825	O54825	BYST_MOUSE	Bysl	Bystin	2.1904	1.26031	0.351288	0.981388	-1.20393	3.06411	0.735179
Q9JI46	Q9JI46	NUDT3_MOUSE	Nudt3	Diphosphoinositol polyphosphate phosphohydrolase 1	17.6401	23.516	0.351587	-1.01733	-20.3213	8.56943	0.735179
Q8VEJ9	Q8VEJ9	VPS4A_MOUSE	Vps4a	Vacuolar protein sorting-associated protein 4A	21.0761	25.8273	0.351852	-1.01874	-16.4832	6.98091	0.735179
Q91YR7	Q91YR7	PRP6_MOUSE	Prpf6	Pre-mRNA-processing factor 6	21.7655	20.404	0.351978	0.994836	-1.85472	4.57775	0.735179
Q569Z5	Q569Z5	DDX46_MOUSE	Ddx46	Probable ATP-dependent RNA helicase DDX46	31.425	30.1781	0.35241	0.976357	-1.60723	4.1011	0.735179
Q8C0L9	Q8C0L9	GPCP1_MOUSE	Gpcpd1	Glycerophosphocholine phosphodiesterase GPCPD1	10.1197	12.3498	0.352707	-1.0068	-7.64353	3.18329	0.735179
O88738	O88738	BIRC6_MOUSE	Birc6	Baculoviral IAP repeat-containing protein 6	14.6193	8.36882	0.352757	1.00756	-8.94896	21.45	0.735179
Q9ERR7	Q9ERR7	SEP15_MOUSE	Selenof	Selenoprotein F	2.53075	4.70661	0.353654	-0.972733	-7.1607	2.80897	0.735179
Q8BMS1	Q8BMS1	ECHA_MOUSE	Hadha	Trifunctional enzyme subunit alpha, mitochondrial	152.668	162.862	0.353749	-0.983161	-34.0185	13.6305	0.735179
Q9CYI0	Q9CYI0	NJMU_MOUSE		Protein Njmu-R1	5.3963	2.2007	0.35428	0.971865	-4.14155	10.5328	0.735179
Q9JM13	Q9JM13	RABX5_MOUSE	Rabgef1	Rab5 GDP/GTP exchange factor	3.51484	5.06137	0.35436	-0.971459	-5.09645	2.00339	0.735179
Q8BMA6	Q8BMA6	SRP68_MOUSE	Srp68	Signal recognition particle subunit SRP68	12.2686	12.9183	0.354413	-0.979361	-2.16344	0.864139	0.735179
Q9Z2N8	Q9Z2N8	ACL6A_MOUSE	Actl6a	Actin-like protein 6A	14.3056	13.4536	0.354514	0.995577	-1.19635	2.90039	0.735179
Q9DBR3	Q9DBR3	ARMC8_MOUSE	Armc8	Armadillo repeat-containing protein 8	11.8797	14.6954	0.354519	-0.998904	-9.62839	3.99699	0.735179
A2ADY9	A2ADY9	DDI2_MOUSE	Ddi2	Protein DDI1 homolog 2	40.1437	42.1995	0.354521	-0.971879	-6.78305	2.67142	0.735179
Q9CZM2	Q9CZM2	RL15_MOUSE	Rpl15	60S ribosomal protein L15	185.947	173.835	0.354934	0.978125	-16.1367	40.3607	0.735179
Q9D0J4	Q9D0J4	ARL2_MOUSE	Arl2	ADP-ribosylation factor-like protein 2	14.3322	17.3556	0.355314	-1.01259	-10.5744	4.52751	0.735179
Q3UHJ0	Q3UHJ0	AAK1_MOUSE	Aak1	AP2-associated protein kinase 1	21.0125	19.0822	0.355449	0.972445	-2.53835	6.39901	0.735179
Q9D0C4	Q9D0C4	TRM5_MOUSE	Trmt5	tRNA (guanine(37)-N1)-methyltransferase	1.99507	3.70389	0.355602	-0.968593	-5.64002	2.2224	0.735179
O35309	O35309	NMI_MOUSE	Nmi	N-myc-interactor	12.7878	16.3574	0.355756	-1.00948	-12.4571	5.31782	0.735179
D3Z6P0	D3Z6P0	PDIA2_MOUSE	Pdia2	Protein disulfide-isomerase A2	21.9391	0.863348	0.355785	1.01671	-32.1555	74.307	0.735179
P35505	P35505	FAAA_MOUSE	Fah	Fumarylacetoacetase	18.919	18.1765	0.355896	0.974857	-0.989024	2.47416	0.735179
Q0VGB7	Q0VGB7	PP4R2_MOUSE	Ppp4r2	Serine/threonine-protein phosphatase 4 regulatory subunit 2	13.4447	18.0448	0.355948	-0.990348	-15.651	6.45079	0.735179
P29341	P29341	PABP1_MOUSE	Pabpc1	Polyadenylate-binding protein 1	86.0477	91.0897	0.356058	-0.979044	-16.9046	6.82066	0.735179
P68368	P68369;P68368;P05213;P68373;Q3UX10	TBA4A_MOUSE	Tuba4a	Tubulin alpha-4A chain	1532.57	1603.05	0.356121	-0.979268	-236.429	95.4754	0.735179
A2A5R2	A2A5R2	BIG2_MOUSE	Arfgef2	Brefeldin A-inhibited guanine nucleotide-exchange protein 2	8.55352	10.8521	0.356834	-1.00503	-8.01302	3.41584	0.735179
P35821	P35821	PTN1_MOUSE	Ptpn1	Tyrosine-protein phosphatase non-receptor type 1	39.2152	36.6751	0.356865	0.967674	-3.33875	8.41902	0.735179
Q99LI7	Q99LI7	CSTF3_MOUSE	Cstf3	Cleavage stimulation factor subunit 3	136.138	113.207	0.356935	0.983686	-31.8035	77.6668	0.735179
A2A8Z1	A2A8Z1	OSBL9_MOUSE	Osbpl9	Oxysterol-binding protein-related protein 9	9.14299	8.12538	0.357769	0.970335	-1.36266	3.39787	0.735179
Q61559	Q61559	FCGRN_MOUSE	Fcgrt	IgG receptor FcRn large subunit p51	3.35384	5.15604	0.357831	-0.969018	-6.0088	2.40439	0.735179
P63325	P63325	RS10_MOUSE	Rps10	40S ribosomal protein S10	65.6365	58.965	0.357985	0.967634	-8.87473	22.2177	0.735179
Q9DBR1	Q9DBR1	XRN2_MOUSE	Xrn2	5'-3' exoribonuclease 2	23.6694	22.2951	0.358062	0.97775	-1.89221	4.64088	0.735179
Q9DB77	Q9DB77	QCR2_MOUSE	Uqcrc2	Cytochrome b-c1 complex subunit 2, mitochondrial	53.0257	55.2361	0.358636	-0.981744	-7.52422	3.10342	0.735179
Q6NSR8	Q6NSR8	PEPL1_MOUSE	Npepl1	Probable aminopeptidase NPEPL1	14.6937	13.1969	0.359498	0.979662	-2.10694	5.10054	0.735179
O55028	O55028	BCKD_MOUSE	Bckdk	[3-methyl-2-oxobutanoate dehydrogenase [lipoamide]] kinase, mitochondrial	13.2319	13.9233	0.359628	-0.961203	-2.29945	0.916485	0.735179
P50446	P50446;Q8BGZ7;Q9Z331	K2C6A_MOUSE	Krt6a	Keratin, type II cytoskeletal 6A	75.9407	5.90002	0.359776	1.00713	-108.338	248.419	0.735179
P62849	P62849	RS24_MOUSE	Rps24	40S ribosomal protein S24	48.8508	54.624	0.360105	-0.975378	-19.6113	8.06488	0.735179
O08915	O08915	AIP_MOUSE	Aip	AH receptor-interacting protein	29.3909	27.2457	0.360174	0.965126	-2.8979	7.18827	0.735179
P62274	P62274	RS29_MOUSE	Rps29	40S ribosomal protein S29	44.0025	52.0934	0.360548	-0.95906	-26.9353	10.7534	0.735179
P28474	P28474	ADHX_MOUSE	Adh5	Alcohol dehydrogenase class-3	50.8156	54.0752	0.360707	-0.967432	-10.9827	4.46339	0.735179
P01915	P01915	HB22_MOUSE		H-2 class II histocompatibility antigen, E-D beta chain	38.2341	53.1139	0.360823	-0.959201	-49.6043	19.8446	0.735179
Q8K1Z0	Q8K1Z0	COQ9_MOUSE	Coq9	Ubiquinone biosynthesis protein COQ9, mitochondrial	1.85245	2.94671	0.36089	-0.957664	-3.64143	1.45291	0.735179
Q2NL51	Q2NL51	GSK3A_MOUSE	Gsk3a	Glycogen synthase kinase-3 alpha	1.57942	3.07992	0.361152	-0.95822	-5.00268	2.00169	0.735179
O35972	O35972	RM23_MOUSE	Mrpl23	39S ribosomal protein L23, mitochondrial	5.97689	7.93836	0.361248	-0.994131	-6.87732	2.95439	0.735179
Q61490	Q61490	CD166_MOUSE	Alcam	CD166 antigen	31.3506	34.4194	0.361585	-0.958476	-10.2541	4.11658	0.735179
P49962	P49962	SRP09_MOUSE	Srp9	Signal recognition particle 9 kDa protein	12.2715	13.6759	0.361592	-0.961444	-4.71151	1.90288	0.735179
Q99JX3	Q99JX3	GORS2_MOUSE	Gorasp2	Golgi reassembly-stacking protein 2	22.6247	25.0181	0.361766	-0.956452	-7.98183	3.19503	0.735179
Q01147	Q01147;P81269	CREB1_MOUSE	Creb1	Cyclic AMP-responsive element-binding protein 1	10.5895	12.9947	0.362027	-0.981353	-8.31198	3.50149	0.735179
P54818	P54818	GALC_MOUSE	Galc	Galactocerebrosidase	19.5256	17.3344	0.362979	0.955904	-2.95825	7.34052	0.735179
O35144	O35144	TERF2_MOUSE	Terf2	Telomeric repeat-binding factor 2	0	0.177448	0.363217	-1	-0.633594	0.278697	0.735179
O88271	O88271	CFDP1_MOUSE	Cfdp1	Craniofacial development protein 1	0	0.79862	0.363217	-1	-2.85154	1.2543	0.735179
O88630	O88630	GOSR1_MOUSE	Gosr1	Golgi SNAP receptor complex member 1	0	0.0266912	0.363217	-1	-0.095303	0.0419207	0.735179
O88653	O88653	LTOR3_MOUSE	Lamtor3	Ragulator complex protein LAMTOR3	0	1.09739	0.363217	-1	-3.91834	1.72355	0.735179
P11679	P11679	K2C8_MOUSE	Krt8	Keratin, type II cytoskeletal 8	8.13498	0	0.363217	1	-12.7767	29.0466	0.735179
P12388	P12388	PAI2_MOUSE	Serpinb2	Plasminogen activator inhibitor 2, macrophage	0	0.964662	0.363217	-1	-3.4444	1.51508	0.735179
P36368;P36369	P36369;P36368	EGFB2_MOUSE;K1B26_MOUSE	Egfbp2;Klk1b26	Epidermal growth factor-binding protein type B	0.972858	0	0.363217	1	-1.52795	3.47367	0.735179
P97493	P97493	THIOM_MOUSE	Txn2	Thioredoxin, mitochondrial	0	1.74742	0.363217	-1	-6.23929	2.74446	0.735179
Q5BKQ4	Q5BKQ4	LIPR1_MOUSE	Pnliprp1	Inactive pancreatic lipase-related protein 1	10.0231	0	0.363217	1	-15.7421	35.7882	0.735179
Q61189	Q61189	ICLN_MOUSE	Clns1a	Methylosome subunit pICln	0	0.814498	0.363217	-1	-2.90823	1.27924	0.735179
Q6PDI6	Q6PDI6	MINY2_MOUSE	Mindy2	Ubiquitin carboxyl-terminal hydrolase MINDY-2	0	0.296965	0.363217	-1	-1.06034	0.466408	0.735179
Q8BHD0	Q8BHD0	RB39A_MOUSE	Rab39a	Ras-related protein Rab-39A	4.06012	0	0.363217	1	-6.37675	14.497	0.735179
Q8CCK0	Q8CCK0	H2AW_MOUSE	Macroh2a2	Core histone macro-H2A.2	0.455715	0	0.363217	1	-0.715738	1.62717	0.735179
Q91YE7	Q91YE7	RBM5_MOUSE	Rbm5	RNA-binding protein 5	0.761983	0	0.363217	1	-1.19676	2.72072	0.735179
Q9QWL7	Q99PS0;Q9QWL7	K1C17_MOUSE	Krt17	Keratin, type I cytoskeletal 17	3.3816	0	0.363217	1	-5.31108	12.0743	0.735179
Q62093	Q62093	SRSF2_MOUSE	Srsf2	Serine/arginine-rich splicing factor 2	76.9537	67.8999	0.363223	0.952657	-12.1218	30.2293	0.735179
Q9CXW4	Q9CXW4	RL11_MOUSE	Rpl11	60S ribosomal protein L11	137.124	150.805	0.363591	-0.957767	-46.0737	18.7117	0.735522
Q8BWT1	Q8BWT1	THIM_MOUSE	Acaa2	3-ketoacyl-CoA thiolase, mitochondrial	48.3482	50.9593	0.363898	-0.963341	-8.87383	3.65163	0.735742
P70387	P70387	HFE_MOUSE	Hfe	Hereditary hemochromatosis protein homolog	4.57297	5.08803	0.364807	-0.951222	-1.72825	0.698129	0.736803
P35831	P35831	PTN12_MOUSE	Ptpn12	Tyrosine-protein phosphatase non-receptor type 12	14.8499	13.4606	0.364821	0.952331	-1.8906	4.66933	0.736803
Q91WG2	Q91WG2	RABE2_MOUSE	Rabep2	Rab GTPase-binding effector protein 2	7.73006	9.49401	0.36529	-0.976034	-6.14337	2.61548	0.737349
Q8BPU7	Q8BPU7	ELMO1_MOUSE	Elmo1	Engulfment and cell motility protein 1	42.6067	40.7456	0.365542	0.950212	-2.53412	6.25642	0.737455
Q922E4	Q922E4	PCY2_MOUSE	Pcyt2	Ethanolamine-phosphate cytidylyltransferase	14.5473	13.1885	0.366068	0.947878	-1.84592	4.56352	0.737785
Q8VI93	Q8VI93	OAS3_MOUSE	Oas3	2'-5'-oligoadenylate synthase 3	49.105	52.7409	0.366252	-0.949283	-12.2449	4.9731	0.737785
Q9JLJ2	Q9JLJ2	AL9A1_MOUSE	Aldh9a1	4-trimethylaminobutyraldehyde dehydrogenase	62.2643	65.5136	0.366303	-0.947299	-10.9152	4.41663	0.737785
Q9EQ32	Q9EQ32	BCAP_MOUSE	Pik3ap1	Phosphoinositide 3-kinase adapter protein 1	18.1073	15.7659	0.366837	0.951474	-3.24739	7.93033	0.738306
Q9CQC9	Q9CQC9	SAR1B_MOUSE	Sar1b	GTP-binding protein SAR1b	47.6458	52.3834	0.367331	-0.944845	-15.9325	6.45732	0.738306
Q8VDK1	Q8VDK1	NIT1_MOUSE	Nit1	Deaminated glutathione amidase	15.095	16.4535	0.367538	-0.94909	-4.60031	1.88318	0.738306
Q9R1Q9	Q9R1Q9	VAS1_MOUSE	Atp6ap1	V-type proton ATPase subunit S1	34.8347	29.6045	0.367589	0.950215	-7.28199	17.7423	0.738306
Q9CSN1	Q9CSN1	SNW1_MOUSE	Snw1	SNW domain-containing protein 1	17.4464	16.2791	0.367645	0.952553	-1.63937	3.97397	0.738306
P63276	P63276	RS17_MOUSE	Rps17	40S ribosomal protein S17	64.4053	72.6045	0.36785	-0.943133	-27.5706	11.1724	0.738306
Q8C147	Q8C147	DOCK8_MOUSE	Dock8	Dedicator of cytokinesis protein 8	16.3865	15.855	0.367957	0.943125	-0.725128	1.78823	0.738306
P63024	P63024;P63044;Q62442	VAMP3_MOUSE	Vamp3	Vesicle-associated membrane protein 3	50.6198	54.7727	0.3686	-0.95635	-14.2773	5.97155	0.738797
Q8CBE3	Q8CBE3	WDR37_MOUSE	Wdr37	WD repeat-containing protein 37	17.8798	19.4545	0.369016	-0.967647	-5.51452	2.36515	0.738797
A2AJI0	A2AJI0	MA7D1_MOUSE	Map7d1	MAP7 domain-containing protein 1	16.1998	14.3906	0.369066	0.951132	-2.56809	6.18639	0.738797
Q1HFZ0	Q1HFZ0	NSUN2_MOUSE	Nsun2	RNA cytosine C(5)-methyltransferase NSUN2	23.108	22.3791	0.369079	0.94976	-1.02983	2.4875	0.738797
Q9CYA6	Q9CYA6	ZCHC8_MOUSE	Zcchc8	Zinc finger CCHC domain-containing protein 8	11.1775	15.702	0.36958	-0.93996	-15.2627	6.21367	0.738797
P51908	P51908	ABEC1_MOUSE	Apobec1	C->U-editing enzyme APOBEC-1	22.6471	20.6539	0.369715	0.950253	-2.8409	6.8272	0.738797
Q9R0Q7	Q9R0Q7	TEBP_MOUSE	Ptges3	Prostaglandin E synthase 3	234.992	257.134	0.369918	-0.941128	-74.9285	30.6442	0.738797
Q91VX2	Q91VX2	UBAP2_MOUSE	Ubap2	Ubiquitin-associated protein 2	5.74614	3.8062	0.369942	0.941534	-2.68933	6.5692	0.738797
Q9Z2K1	Q9Z2K1	K1C16_MOUSE	Krt16	Keratin, type I cytoskeletal 16	48.0183	22.7284	0.370092	0.977077	-39.7191	90.2989	0.738797
O55142	O55142	RL35A_MOUSE	Rpl35a	60S ribosomal protein L35a	267.286	239.829	0.370985	0.938195	-38.0542	92.9685	0.738797
Q8R001	Q8R001	MARE2_MOUSE	Mapre2	Microtubule-associated protein RP/EB family member 2	9.80892	11.9925	0.371166	-0.951456	-7.54295	3.17578	0.738797
P62814	P62814	VATB2_MOUSE	Atp6v1b2	V-type proton ATPase subunit B, brain isoform	353.068	377.648	0.371306	-0.93901	-83.4437	34.2834	0.738797
P28659	P28659	CELF1_MOUSE	Celf1	CUGBP Elav-like family member 1	10.6447	12.8456	0.371605	-0.973541	-7.87545	3.47362	0.738797
Q99KW3	Q99KW3	TARA_MOUSE	Triobp	TRIO and F-actin-binding protein	4.58285	6.14954	0.37169	-0.967221	-5.55464	2.42126	0.738797
P09405	P09405	NUCL_MOUSE	Ncl	Nucleolin	130.156	111.898	0.371737	0.947456	-26.3522	62.8687	0.738797
Q9D1E8	Q9D1E8	PLCE_MOUSE	Agpat5	1-acyl-sn-glycerol-3-phosphate acyltransferase epsilon	7.25739	9.54017	0.371751	-0.978011	-8.23079	3.66523	0.738797
Q62261	Q62261	SPTB2_MOUSE	Sptbn1	Spectrin beta chain, non-erythrocytic 1	20.0392	18.9197	0.372059	0.942018	-1.59104	3.83011	0.738797
Q8VC30	Q8VC30	TKFC_MOUSE	Tkfc	Triokinase/FMN cyclase	4.56876	6.12426	0.372109	-0.975888	-5.60032	2.48931	0.738797
Q6PFE3	Q6PFE3	RA54B_MOUSE	Rad54b	DNA repair and recombination protein RAD54B	2.27921	4.77309	0.372163	-0.941565	-8.53037	3.54262	0.738797
Q9DCG9	Q9DCG9	TR112_MOUSE	Trmt112	Multifunctional methyltransferase subunit TRM112-like protein	37.1782	34.2234	0.37239	0.935205	-4.11515	10.0248	0.738797
O55047;Q8C0V0;Q9WUT3	Q9WUT3;Q8C0V0;O55047	KS6A2_MOUSE;TLK1_MOUSE;TLK2_MOUSE	Rps6ka2;Tlk1;Tlk2	Serine/threonine-protein kinase tousled-like 2	17.5871	14.3185	0.372391	0.935561	-4.55778	11.0948	0.738797
Q69ZN7	Q69ZN7	MYOF_MOUSE	Myof	Myoferlin	77.5238	73.9891	0.372749	0.959179	-5.37516	12.4446	0.73904
Q9JKV1	Q9JKV1	ADRM1_MOUSE	Adrm1	Proteasomal ubiquitin receptor ADRM1	35.0018	41.2988	0.372912	-0.945826	-21.7489	9.15482	0.73904
E9Q912	E9Q912	GDS1_MOUSE	Rap1gds1	Rap1 GTPase-GDP dissociation stimulator 1	12.7739	13.6792	0.37362	-0.944722	-3.13199	1.32138	0.73985
P83887;Q8VCK3	Q8VCK3;P83887	TBG1_MOUSE;TBG2_MOUSE	Tubg1;Tubg2	Tubulin gamma-1 chain	20.4657	24.6062	0.373946	-0.973039	-14.9803	6.69934	0.73985
P18181	P18181	CD48_MOUSE	Cd48	CD48 antigen	21.808	23.2244	0.374016	-0.931563	-4.81488	1.98225	0.73985
Q4KMM3	Q4KMM3	OXR1_MOUSE	Oxr1	Oxidation resistance protein 1	9.53344	7.9549	0.37412	0.941964	-2.29439	5.45147	0.73985
Q61735	Q61735	CD47_MOUSE	Cd47	Leukocyte surface antigen CD47	19.2155	15.6989	0.374806	0.947269	-5.24777	12.2811	0.740812
O54833	O54833	CSK22_MOUSE	Csnk2a2	Casein kinase II subunit alpha'	23.2639	21.3594	0.375114	0.941805	-2.79704	6.60584	0.741025
Q6NZJ6	Q6NZJ6	IF4G1_MOUSE	Eif4g1	Eukaryotic translation initiation factor 4 gamma 1	33.1958	35.112	0.375798	-0.946509	-6.71587	2.88347	0.741825
Q8C0P5	Q8C0P5	COR2A_MOUSE	Coro2a	Coronin-2A	4.1121	5.44276	0.375919	-0.954363	-4.72296	2.06163	0.741825
P70245	P70245	EBP_MOUSE	Ebp	3-beta-hydroxysteroid-Delta(8),Delta(7)-isomerase	3.51246	4.86451	0.37617	-0.956172	-4.81826	2.11418	0.741924
Q80UG5	Q80UG5	SEPT9_MOUSE	Septin9	Septin-9	45.4291	49.0864	0.376454	-0.926846	-12.4842	5.16967	0.742089
Q9QZ06	Q9QZ06	TOLIP_MOUSE	Tollip	Toll-interacting protein	33.6843	35.5185	0.377571	-0.930503	-6.32733	2.65903	0.743895
Q8CDA1	Q8CDA1	SAC2_MOUSE	Inpp5f	Phosphatidylinositide phosphatase SAC2	1.9928	2.90163	0.377782	-0.952961	-3.24847	1.43082	0.743915
Q9JKW0	Q9JKW0	AR6P1_MOUSE	Arl6ip1	ADP-ribosylation factor-like protein 6-interacting protein 1	35.2878	42.1878	0.378421	-0.943002	-24.3594	10.5594	0.744629
Q11136	Q11136	PEPD_MOUSE	Pepd	Xaa-Pro dipeptidase	59.3999	62.0392	0.378604	-0.926719	-9.09663	3.81803	0.744629
Q9D892	Q9D892	ITPA_MOUSE	Itpa	Inosine triphosphate pyrophosphatase	35.8737	37.8046	0.378903	-0.923172	-6.62881	2.76701	0.744629
P62077	P62077	TIM8B_MOUSE	Timm8b	Mitochondrial import inner membrane translocase subunit Tim8 B	10.6805	9.50583	0.378949	0.925574	-1.69868	4.04793	0.744629
Q99LD9	Q99LD9	EI2BB_MOUSE	Eif2b2	Translation initiation factor eIF-2B subunit beta	3.2634	4.98708	0.379609	-0.922966	-5.93479	2.48743	0.745106
Q05512	Q05512	MARK2_MOUSE	Mark2	Serine/threonine-protein kinase MARK2	5.51956	7.26879	0.379778	-0.948713	-6.2728	2.77434	0.745106
Q9DBB8	Q9DBB8	DHDH_MOUSE	Dhdh	Trans-1,2-dihydrobenzene-1,2-diol dehydrogenase	6.59097	8.89066	0.379941	-0.93867	-8.12391	3.52452	0.745106
Q9EPB4	Q9EPB4	ASC_MOUSE	Pycard	Apoptosis-associated speck-like protein containing a CARD	25.0947	22.0984	0.379996	0.925082	-4.37564	10.3683	0.745106
Q9ERS2	Q9ERS2	NDUAD_MOUSE	Ndufa13	NADH dehydrogenase [ubiquinone] 1 alpha subcomplex subunit 13	50.1773	47.8438	0.380211	0.931876	-3.5005	8.16757	0.745133
Q8K199	Q8K199	COXM2_MOUSE	Cmc2	COX assembly mitochondrial protein 2 homolog	8.24797	10.336	0.380683	-0.931781	-7.32379	3.14769	0.745664
Q8VIM9	Q8VIM9	IRGQ_MOUSE	Irgq	Immunity-related GTPase family Q protein	8.39235	6.07319	0.381023	0.923989	-3.41187	8.05018	0.745745
Q9CR68	Q9CR68	UCRI_MOUSE	Uqcrfs1	Cytochrome b-c1 complex subunit Rieske, mitochondrial	57.1493	53.2183	0.381127	0.940649	-6.14918	14.0111	0.745745
P28656	P28656	NP1L1_MOUSE	Nap1l1	Nucleosome assembly protein 1-like 1	43.0336	41.6882	0.381768	0.931323	-2.04947	4.74027	0.746605
Q9DAW6	Q9DAW6	PRP4_MOUSE	Prpf4	U4/U6 small nuclear ribonucleoprotein Prp4	14.3276	17.2926	0.382264	-0.950813	-10.8046	4.87442	0.74718
Q8K3C0	Q8K3C0	RNK_MOUSE	Rnasek	Ribonuclease kappa	6.05915	8.98031	0.382812	-0.937748	-10.4509	4.60855	0.747534
P39061	P39061	COIA1_MOUSE	Col18a1	Collagen alpha-1(XVIII) chain	2.13044	3.29808	0.382872	-0.91569	-4.03648	1.70119	0.747534
P84104	P84104	SRSF3_MOUSE	Srsf3	Serine/arginine-rich splicing factor 3	247.75	281.895	0.383696	-0.929108	-121.014	52.7224	0.747534
O89110	O89110	CASP8_MOUSE	Casp8	Caspase-8	23.3377	25.1222	0.383935	-0.918585	-6.22766	2.6586	0.747534
Q9CPY7	Q9CPY7	AMPL_MOUSE	Lap3	Cytosol aminopeptidase	36.1051	37.5656	0.384271	-0.913415	-5.06422	2.14312	0.747534
O54879	O54879	HMGB3_MOUSE	Hmgb3	High mobility group protein B3	13.3003	11.645	0.384376	0.914797	-2.44403	5.75463	0.747534
Q9D0J8	Q9D0J8	PTMS_MOUSE	Ptms	Parathymosin	44.8758	36.0119	0.384441	0.924631	-13.5769	31.3047	0.747534
P16460	P16460	ASSY_MOUSE	Ass1	Argininosuccinate synthase	26.8083	31.2398	0.384593	-0.919983	-15.5473	6.68442	0.747534
P08508	P08508	FCGR3_MOUSE	Fcgr3	Low affinity immunoglobulin gamma Fc region receptor III	71.531	76.3718	0.384717	-0.918551	-16.9554	7.27375	0.747534
Q3TC46	Q3TC46	PATL1_MOUSE	Patl1	Protein PAT1 homolog 1	2.80007	3.96312	0.384775	-0.908981	-4.01454	1.68844	0.747534
P19157	P46425;P19157	GSTP1_MOUSE	Gstp1	Glutathione S-transferase P 1	32.8394	30.1022	0.385016	0.941185	-4.48358	9.95795	0.747534
O35643	O35643	AP1B1_MOUSE	Ap1b1	AP-1 complex subunit beta-1	98.3397	102.857	0.385131	-0.909537	-15.6314	6.59698	0.747534
Q3TC93	Q3TC93	H1BP3_MOUSE	Hs1bp3	HCLS1-binding protein 3	21.7194	23.5136	0.385319	-0.933617	-6.45683	2.86843	0.747534
O88522	O88522	NEMO_MOUSE	Ikbkg	NF-kappa-B essential modulator	9.82459	9.15964	0.385432	0.924716	-1.03019	2.36007	0.747534
Q8K0P3	Q8K0P3	MEAK7_MOUSE	Meak7	MTOR-associated protein MEAK7	19.229	17.8898	0.385596	0.918935	-2.03486	4.7132	0.747534
P00405	P00405	COX2_MOUSE	Mtco2	Cytochrome c oxidase subunit 2	146.823	157.924	0.385674	-0.929016	-39.7228	17.5205	0.747534
Q64152	Q64152	BTF3_MOUSE	Btf3	Transcription factor BTF3	16.6097	15.0216	0.3863	0.911119	-2.36318	5.53948	0.747977
P61164	Q8R5C5;P61164	ACTZ_MOUSE	Actr1a	Alpha-centractin	65.875	73.0967	0.386441	-0.915098	-25.3651	10.9218	0.747977
Q9R049	Q9R049	AMFR_MOUSE	Amfr	E3 ubiquitin-protein ligase AMFR	6.46884	8.46787	0.386649	-0.941588	-7.33929	3.34124	0.747977
Q91WM3	Q91WM3	U3IP2_MOUSE	Rrp9	U3 small nucleolar RNA-interacting protein 2	5.15806	6.76765	0.386711	-0.938525	-5.8812	2.66202	0.747977
Q8VC04	Q8VC04	T106A_MOUSE	Tmem106a	Transmembrane protein 106A	68.8777	72.1821	0.387045	-0.917883	-11.692	5.08323	0.748234
Q6PGB6	Q6PGB6	NAA50_MOUSE	Naa50	N-alpha-acetyltransferase 50	11.285	13.5012	0.387248	-0.935864	-8.08429	3.65186	0.748235
Q9WUK2	Q9WUK2	IF4H_MOUSE	Eif4h	Eukaryotic translation initiation factor 4H	14.7459	12.0915	0.387816	0.936111	-4.40649	9.71536	0.748683
P70335	P70335	ROCK1_MOUSE	Rock1	Rho-associated protein kinase 1	13.7728	16.5587	0.387884	-0.935845	-10.1957	4.62382	0.748683
Q8BWY3	Q8BWY3	ERF1_MOUSE	Etf1	Eukaryotic peptide chain release factor subunit 1	29.0201	30.7288	0.38827	-0.904394	-5.95205	2.53468	0.749007
Q80XI3	Q80XI3	IF4G3_MOUSE	Eif4g3	Eukaryotic translation initiation factor 4 gamma 3	7.98158	7.35032	0.388567	0.907231	-0.949458	2.21199	0.749007
P46638	P62492;P46638	RB11B_MOUSE	Rab11b	Ras-related protein Rab-11B	230.353	217.755	0.388701	0.906798	-18.9473	44.1453	0.749007
P10107	P10107	ANXA1_MOUSE	Anxa1	Annexin A1	775.23	927.958	0.388861	-0.900882	-530.54	225.084	0.749007
Q99J47	Q99J47	DRS7B_MOUSE	Dhrs7b	Dehydrogenase/reductase SDR family member 7B	11.8851	10.4608	0.389122	0.916979	-2.23515	5.08375	0.74912
Q64735	Q64735	CR1L_MOUSE	Cr1l	Complement component receptor 1-like protein	12.8361	15.7303	0.389456	-0.933019	-10.6283	4.83988	0.749375
Q99JY4	Q99JY4	TRABD_MOUSE	Trabd	TraB domain-containing protein	13.9245	12.2798	0.389949	0.922426	-2.65881	5.94827	0.749814
Q8C1Y8	Q8C1Y8	CCZ1_MOUSE	Ccz1	Vacuolar fusion protein CCZ1 homolog	5.8744	7.81027	0.390089	-0.9247	-7.03293	3.16118	0.749814
Q9QVP9	Q9QVP9	FAK2_MOUSE	Ptk2b	Protein-tyrosine kinase 2-beta	23.3115	23.9794	0.390599	-0.901694	-2.34256	1.00659	0.750405
Q8BHF7	Q8BHF7	PGPS1_MOUSE	Pgs1	CDP-diacylglycerol--glycerol-3-phosphate 3-phosphatidyltransferase, mitochondrial	7.2869	8.74958	0.390885	-0.923209	-5.32222	2.39685	0.750548
Q9D1P0	Q9D1P0	RM13_MOUSE	Mrpl13	39S ribosomal protein L13, mitochondrial	9.04794	11.0257	0.391079	-0.903523	-6.97248	3.0169	0.750548
Q9ET54	Q9ET54	PALLD_MOUSE	Palld	Palladin	17.3598	15.3171	0.391934	0.895803	-3.05583	7.14136	0.7518
P62874	P62874	GBB1_MOUSE	Gnb1	Guanine nucleotide-binding protein G(I)/G(S)/G(T) subunit beta-1	122.442	136.701	0.392537	-0.901932	-50.4942	21.9755	0.752565
O54774	O54774	AP3D1_MOUSE	Ap3d1	AP-3 complex subunit delta-1	22.1633	23.0588	0.393298	-0.89552	-3.14979	1.35865	0.753194
Q8R127	Q8R127	SCPDL_MOUSE	Sccpdh	Saccharopine dehydrogenase-like oxidoreductase	3.13638	1.08911	0.393395	0.903621	-3.20598	7.30051	0.753194
Q9EQC1	Q9EQC1	3BHS7_MOUSE	Hsd3b7	3 beta-hydroxysteroid dehydrogenase type 7	13.0889	9.55257	0.39386	0.898629	-5.46252	12.5352	0.753194
Q63829	Q63829	COMD3_MOUSE	Commd3	COMM domain-containing protein 3	18.4576	20.9172	0.393876	-0.927015	-9.15105	4.23172	0.753194
P70670	P70670;Q60817	NACAM_MOUSE	Naca	Nascent polypeptide-associated complex subunit alpha, muscle-specific form	44.2499	34.91	0.394387	0.90263	-14.7347	33.4145	0.753194
Q8K0Z7	Q8K0Z7	TACO1_MOUSE	Taco1	Translational activator of cytochrome c oxidase 1	3.55696	5.38932	0.394411	-0.892601	-6.44819	2.78348	0.753194
Q62383	Q62383	SPT6H_MOUSE	Supt6h	Transcription elongation factor SPT6	36.1677	27.8481	0.394498	0.921594	-14.123	30.7621	0.753194
Q8K1T1	Q8K1T1	LRC25_MOUSE	Lrrc25	Leucine-rich repeat-containing protein 25	13.8615	17.1634	0.394678	-0.890006	-11.585	4.98132	0.753194
Q9ERI6	Q9ERI6	RDH14_MOUSE	Rdh14	Retinol dehydrogenase 14	12.9243	15.5244	0.394695	-0.911897	-9.4637	4.26366	0.753194
Q922B2	Q922B2	SYDC_MOUSE	Dars1	Aspartate--tRNA ligase, cytoplasmic	127.619	122.606	0.3954	0.891749	-7.67521	17.7022	0.753615
O08638	O08638	MYH11_MOUSE	Myh11	Myosin-11	2.5534	7.63635	0.395737	-0.901323	-18.2673	8.10139	0.753615
B9EJ86	B9EJ86	OSBL8_MOUSE	Osbpl8	Oxysterol-binding protein-related protein 8	101.682	94.9643	0.395744	0.887407	-10.1545	23.5903	0.753615
Q9CRC6	Q9CRC6	BORC7_MOUSE	Borcs7	BLOC-1-related complex subunit 7	10.0346	8.99757	0.3958	0.888493	-1.57493	3.6489	0.753615
P46978	P46978	STT3A_MOUSE	Stt3a	Dolichyl-diphosphooligosaccharide--protein glycosyltransferase subunit STT3A	57.7632	50.6621	0.395991	0.888956	-10.827	25.0292	0.753615
P30681	P30681	HMGB2_MOUSE	Hmgb2	High mobility group protein B2	43.1247	38.6106	0.396136	0.905398	-7.34079	16.3691	0.753615
P06801	P06801	MAOX_MOUSE	Me1	NADP-dependent malic enzyme	12.0062	10.3786	0.396477	0.887325	-2.47948	5.73462	0.753876
Q6P069	Q6P069	SORCN_MOUSE	Sri	Sorcin	85.9611	93.5362	0.396749	-0.906303	-27.5982	12.4478	0.754005
O35841	O35841	API5_MOUSE	Api5	Apoptosis inhibitor 5	33.2486	34.3371	0.397288	-0.884684	-3.83347	1.65644	0.754304
Q9Z2I8	Q9Z2I8	SUCB2_MOUSE	Suclg2	Succinate--CoA ligase [GDP-forming] subunit beta, mitochondrial	17.2639	15.3565	0.397516	0.900239	-3.08896	6.90366	0.754304
Q8BTW3	Q8BTW3	EXOS6_MOUSE	Exosc6	Exosome complex component MTR3	14.5366	13.285	0.397614	0.886006	-1.92136	4.42469	0.754304
Q9ERD7	Q9ERD7	TBB3_MOUSE	Tubb3	Tubulin beta-3 chain	1.73267	4.93065	0.397884	-0.894335	-11.48	5.08401	0.754304
P84078	P61205;P84078	ARF1_MOUSE	Arf1	ADP-ribosylation factor 1	367.951	294.639	0.397924	0.895892	-117.302	263.926	0.754304
Q9QZE5	Q9QZE5	COPG1_MOUSE	Copg1	Coatomer subunit gamma-1	50.8011	52.521	0.398231	-0.891675	-6.15671	2.71695	0.754501
Q9DBP5	Q9DBP5	KCY_MOUSE	Cmpk1	UMP-CMP kinase	76.4369	84.7381	0.398747	-0.895317	-29.979	13.3766	0.754929
P49443	P49443	PPM1A_MOUSE	Ppm1a	Protein phosphatase 1A	23.2172	24.1816	0.398865	-0.886802	-3.43437	1.50571	0.754929
Q921H8	Q8VCH0;Q921H8	THIKA_MOUSE	Acaa1a	3-ketoacyl-CoA thiolase A, peroxisomal	59.0504	62.1726	0.399416	-0.901735	-11.4414	5.19695	0.755587
Q9WTX5	Q9WTX5	SKP1_MOUSE	Skp1	S-phase kinase-associated protein 1	30.2617	28.2824	0.399871	0.884882	-3.1024	7.061	0.756061
P62743	P62743	AP2S1_MOUSE	Ap2s1	AP-2 complex subunit sigma	31.5335	33.4835	0.400939	-0.885259	-6.99788	3.09788	0.756623
Q8K4Z3	Q8K4Z3	NNRE_MOUSE	Naxe	NAD(P)H-hydrate epimerase	60.8976	62.8476	0.401	-0.896378	-7.13696	3.23702	0.756623
Q6PDM2	Q6PDM2	SRSF1_MOUSE	Srsf1	Serine/arginine-rich splicing factor 1	57.655	51.6356	0.401261	0.892428	-9.86934	21.9083	0.756623
Q8BMK4	Q8BMK4	CKAP4_MOUSE	Ckap4	Cytoskeleton-associated protein 4	36.7472	38.175	0.401277	-0.907615	-5.33979	2.48419	0.756623
Q6ZQ73	Q6ZQ73	CAND2_MOUSE	Cand2	Cullin-associated NEDD8-dissociated protein 2	10.1032	12.1982	0.401802	-0.893912	-7.66603	3.47612	0.756623
P35278	Q9CQD1;P61021;P35278	RAB5C_MOUSE	Rab5c	Ras-related protein Rab-5C	202.482	216.48	0.40183	-0.882451	-50.2126	22.2172	0.756623
Q7M6Y3	Q7M6Y3	PICAL_MOUSE	Picalm	Phosphatidylinositol-binding clathrin assembly protein	26.9625	23.597	0.402176	0.879169	-5.29434	12.0254	0.756623
P28843	P28843	DPP4_MOUSE	Dpp4	Dipeptidyl peptidase 4	4.33092	2.22139	0.402794	0.877422	-3.31886	7.5379	0.756623
P63158	P30681;P63158	HMGB1_MOUSE	Hmgb1	High mobility group protein B1	82.7798	88.6625	0.402904	-0.875592	-20.9657	9.2004	0.756623
Q3THJ3	Q3THJ3	EIF1A_MOUSE	Eif1ad	Probable RNA-binding protein EIF1AD	0.872985	1.73418	0.402907	-0.876343	-3.07328	1.3509	0.756623
Q8BYB9	Q8BYB9	PGLT1_MOUSE	Poglut1	Protein O-glucosyltransferase 1	4.9173	7.29591	0.402963	-0.878017	-8.51525	3.75804	0.756623
Q8BP47	Q8BP47	SYNC_MOUSE	NARS1	Asparagine--tRNA ligase, cytoplasmic	73.1023	78.1249	0.403254	-0.873915	-17.8798	7.83455	0.756623
Q6P3A9	Q6P3A9	ARL11_MOUSE	Arl11	ADP-ribosylation factor-like protein 11	2.1114	3.36303	0.403406	-0.872963	-4.45166	1.94839	0.756623
Q8R143	Q8R143	PTTG_MOUSE	Pttg1ip	Pituitary tumor-transforming gene 1 protein-interacting protein	19.6422	17.274	0.403943	0.885125	-3.8903	8.62666	0.756623
Q8BHS3	Q8BHS3	RBM22_MOUSE	Rbm22	Pre-mRNA-splicing factor RBM22	10.57	12.7699	0.404083	-0.907186	-8.34798	3.94819	0.756623
Q9R0N0	Q9R0N0	GALK1_MOUSE	Galk1	Galactokinase	23.7171	22.7689	0.404089	0.872008	-1.48185	3.37832	0.756623
Q8BUM3	Q8BUM3	PTN7_MOUSE	Ptpn7	Tyrosine-protein phosphatase non-receptor type 7	23.0935	24.3392	0.404186	-0.872531	-4.44423	1.95283	0.756623
Q3UFK8	Q3UFK8	FRMD8_MOUSE	Frmd8	FERM domain-containing protein 8	3.17477	4.28854	0.404198	-0.877137	-4.0057	1.77816	0.756623
Q8R326	Q8R326	PSPC1_MOUSE	Pspc1	Paraspeckle component 1	10.4407	13.0093	0.404328	-0.893476	-9.51713	4.37989	0.756623
Q8CG76	Q8CG76	ARK72_MOUSE	Akr7a2	Aflatoxin B1 aldehyde reductase member 2	20.4983	21.3725	0.404416	-0.882029	-3.17449	1.42622	0.756623
Q99K01	Q99K01	PDXD1_MOUSE	Pdxdc1	Pyridoxal-dependent decarboxylase domain-containing protein 1	22.9776	24.095	0.404549	-0.885664	-4.0871	1.85226	0.756623
P70452	P70452	STX4_MOUSE	Stx4	Syntaxin-4	16.7246	15.9211	0.405186	0.869905	-1.26063	2.86757	0.756623
Q61084	Q61084	M3K3_MOUSE	Map3k3	Mitogen-activated protein kinase kinase kinase 3	2.12589	3.98315	0.405207	-0.869032	-6.61924	2.90472	0.756623
Q6PEB6	Q6PEB6	PHOCN_MOUSE	Mob4	MOB-like protein phocein	11.842	14.2807	0.405369	-0.881359	-8.88904	4.01162	0.756623
P27661	Q8BFU2;Q8R1M2;P27661;C0HKE1;C0HKE2;C0HKE3;C0HKE4;Q8CGP5;C0HKE5;Q8CGP6;C0HKE6;Q8CGP7;C0HKE7;C0HKE8;C0HKE9	H2AX_MOUSE	H2ax	Histone H2AX	4529.93	3965.92	0.405562	0.868692	-884.418	2012.44	0.756623
O08582	O08582	GTPB1_MOUSE	Gtpbp1	GTP-binding protein 1	11.411	8.35431	0.405875	0.869615	-4.82765	10.9411	0.756623
Q8K1I7	Q8K1I7	WIPF1_MOUSE	Wipf1	WAS/WASL-interacting protein family member 1	80.6127	74.2156	0.405886	0.868596	-10.0637	22.8578	0.756623
Q8BYZ1	Q8BYZ1	ABI3_MOUSE	Abi3	ABI gene family member 3	25.0328	22.9249	0.405888	0.882255	-3.50043	7.71623	0.756623
Q9D5V5	Q9D5V5	CUL5_MOUSE	Cul5	Cullin-5	16.2013	19.2476	0.406235	-0.900968	-11.5632	5.4706	0.756889
P62264	P62264	RS14_MOUSE	Rps14	40S ribosomal protein S14	97.5724	107.709	0.407338	-0.86715	-36.3904	16.1166	0.758003
Q9Z2E1	Q9Z2E1	MBD2_MOUSE	Mbd2	Methyl-CpG-binding domain protein 2	13.0832	11.4105	0.407547	0.86527	-2.64593	5.99149	0.758003
P63028	P63028	TCTP_MOUSE	Tpt1	Translationally-controlled tumor protein	117.065	126.419	0.407769	-0.883455	-34.6572	15.9485	0.758003
Q9ET30	Q9ET30	TM9S3_MOUSE	Tm9sf3	Transmembrane 9 superfamily member 3	54.946	49.8809	0.407966	0.883326	-8.65075	18.7809	0.758003
Q8VBT9	Q8VBT9	ASPC1_MOUSE	Aspscr1	Tether containing UBX domain for GLUT4	10.527	9.59837	0.408158	0.890519	-1.63602	3.49338	0.758003
P45377	P45377	ALD2_MOUSE	Akr1b8	Aldose reductase-related protein 2	34.1341	37.0714	0.408315	-0.892622	-11.1022	5.22773	0.758003
Q9CR60	Q9CR60	GOT1B_MOUSE	Golt1b	Vesicle transport protein GOT1B	27.3649	33.8228	0.408784	-0.882104	-23.9955	11.0798	0.758003
Q60737	Q60737	CSK21_MOUSE	Csnk2a1	Casein kinase II subunit alpha	23.8103	25.743	0.409012	-0.882865	-7.20011	3.33478	0.758003
P62774	P62774	MTPN_MOUSE	Mtpn	Myotrophin	27.1356	22.8453	0.409022	0.8716	-7.07678	15.6574	0.758003
[truncated: 1,707 more rows]
